# Supplementary material
Source: publisher figshare collection journal article supplement (https://gsapubs.figshare.com/ndownloader/files/36344595)
Supplement: Supplementary file 1 [file 36344595]

## Sheet: Table S1. Figure 4 source
	Location	Type	n	Eigenvalue 1	Trend	Plunge	Eigenvalue 2	Trend	Plunge	Eigenvalue 3	Trend	Plunge
1	Picacho, no Tg	Lineation	90	0.9287	232.1	3.1	0.0506	110.6	84.1	0.0207	322.3	5.1
1.5	Picacho, Barnett Well Tg only	Lineation	19	0.9715	223.7	3.6	0.017	319	56	0.0115	131.3	33.8
	Tortolita W, SW, no Tg	Lineation	399	0.8999	64.2	2.5	0.0607	327.8	68.4	0.0394	155.2	21.4				Spencer, J.E., Richard, S.M., Bykerk-Kauffman, A., Constenius, K.N., and Valencia, V.A., 2022, Structure, chronology, kinematics, and geodynamics of tectonic extension in the greater Catalina metamorphic core complex, southeastern Arizona, USA: Geosphere, v. 18, no. X, p. XXX–XXX, https://doi.org/10.1130/GES02485.1
	Tortolita Tg only (Ttm, Tw)	Lineation	185	0.8877	57.9	5.9	0.0933	298.4	78.1	0.019	149	10.3
	Tortolita - Guild Wash shear zone	Lineation	105	0.7855	67.3	11	0.1294	303.7	70.7	0.085	160.4	15.7
	Tortolita - Carpas Wash shear zone	Lineation	41	0.7676	257.5	18.7	0.1694	81.9	71.3	0.063	347.9	1.4
4	Pusch Peak	Lineation	50	0.9683	247.4	21.2	0.0181	344.5	17.5	0.0137	110.8	61.9
5	Pontotoc (Banks MF-747) lin	Lineation	14	0.9656	241.8	13.8	0.0304	337.1	20.7	0.004	120.5	64.7
6	Babad Do'ag	Lineation	84	0.9658	245.1	5.4	0.0279	18.7	82.2	0.0064	154.5	5.6
7	Sabino Canyon	Lineation	56	0.9905	247.6	13.9	0.0053	353.9	48.6	0.0041	146.4	38.1
8	Soldier Canyon, Lower	Lineation	54	0.9854	246.3	9.1	0.0097	352.4	60	0.0049	151.3	28.3
9	Agua Caliente Hill	Lineation	15	0.9609	245.5	2.6	0.0314	357.3	83.1	0.0076	155.2	6.4
10	Tanque Verde Falls	Lineation	17	0.9235	72.6	3.2	0.0607	197.2	84.3	0.0158	342.3	4.7
11	Tanque Verde Ridge	Lineation	28	0.9675	239.4	16.1	0.0229	130	49	0.0096	341.7	36.4
12	Rincon Valley N	Lineation	62	0.9053	69.8	4.3	0.0629	178.7	77	0.0319	338.9	12.2
13	Rincon Valley SE	Lineation	62	0.9387	247.4	3.9	0.039	360	80	0.0223	156.7	9.2
14	Rincon Peak S	Lineation	45	0.8762	62.2	14.6	0.0875	173	53.8	0.0364	322.7	32.3
16	Suizo Mts	Lineation	98	0.94	65.9	24.3	0.0438	252.9	65.6	0.0162	157.1	2.6
17	Durham Hills Tg only	Lineation	23	0.8848	53	41.6	0.1032	244.1	47.9	0.012	147.9	5.5
			1428
	Eigenvector trend and plunge and eigenvalues calculated using Stereonet 10.0 (Almendinger et al., 2012; Cardozo and Allmendinger et al., 2013)
	Allmendinger, R.W., Cardozo, N., and Fisher, D.M., 2012, Structural geology algorithms: Vectors and tensors: Cambridge, England, Cambridge University Press, 289 p.
	Cardozo, N., and Allmendinger, R.W., 2013, Spherical projections with OSXStereonet: Computers & Geosciences, v. 51, p. 193-205, doi: 10.1016/j.cageo.2012.07.021.

## Sheet: Table S2. Data summary
Location	Type	Location Number	n	Eigenvalue 1	Trend (strike)	Plunge (dip)	Eigenvalue 2	Trend (strike)	Plunge (dip)	Eigenvalue 3	Trend (strike)	Plunge (dip)	Strike from eigenpole	Dip from eigenpole
Agua Caliente Hill	Foliation pole	10	6	0.8633	82.2	72.8	0.1314	343.4	2.7	0.0052	252.6	17	172.2	17.2
Agua Caliente Hill	Lineation	10	15	0.9609	245.5	2.6	0.0314	357.3	83.1	0.0076	155.2	6.4
Agua Caliente Hill NW	Foliation pole	10a	6	0.859	132	61.6	0.1191	271.8	22.4	0.0219	8.8	16.5	222	28.4
Agua Caliente Hill NW	Lineation	10a	6	0.8982	297.4	28	0.0953	35.5	14.8	0.0064	150.1	57.7
Babad Do'ag	Foliation pole	5	37	0.9784	5.1	76.8	0.015	143.9	10	0.0066	235.4	8.5	95.1	13.2
Babad Do'ag	Lineation	5	84	0.9658	245.1	5.4	0.0279	18.7	82.2	0.0064	154.5	5.6
Bellota E	Lineation	9	21	0.9546	15.3	1.6	0.0316	283.6	47.4	0.0138	106.7	42.6
Bellota W	Lineation	8	17	0.9577	26.7	4.7	0.0249	123	52.7	0.0175	293.2	36.9
Desert Peak	Lineation		5	0.9195	64.7	24.6	0.0612	244.5	65.4	0.0192	334.7	0.1
Durham Hills	Lineation		23	0.8848	53	41.6	0.1032	244.1	47.9	0.012	147.9	5.5
Gibbon Mtn	Foliation pole	2	33	0.9654	169.4	84.2	0.0277	351.4	5.8	0.0069	261.4	0.2	259.4	5.8
Gibbon Mtn	Lineation	2	59	0.983	58.4	3.5	0.0136	324.6	47.6	0.0034	151.6	42.2
Molino Basin 2	foliation pole	6	13	0.9745	243.5	73.2	0.0184	142.7	3.2	0.0071	51.8	16.5	333.5	16.8
Molino Basin 2	lineation	6	61	0.9778	44.6	12.9	0.012	302.1	43.3	0.0102	147.3	43.9
Molino Canyon, middle	foliation pole	5a	8	0.9601	215	73.2	0.0378	338.1	9.3	0.0021	70.4	13.8	305	16.8
Molino Canyon, middle	lineation	5a	15	0.9936	60.1	9.1	0.0038	328.7	9	0.0026	194.8	77.2
Picacho	lineation		103	0.9333	231.2	3.3	0.0464	112	83.2	0.0204	321.5	5.9
Prison Camp	Foliation pole	4	22	0.9631	214.5	79.5	0.0321	331.8	4.8	0.0048	62.6	9.3	304.5	10.5
Prison Camp	Lineation	4	89	0.9681	57.3	6.9	0.0252	323.3	30.3	0.0067	158.8	58.8
Pusch Peak	Foliation pole	15	40	0.9493	26.3	63	0.0334	145.1	13.8	0.0173	241	22.8	116.3	27
Pusch Peak	Lineation	15	50	0.9683	247.4	21.2	0.0181	344.5	17.5	0.0137	110.8	61.9
Rincon Peak S	Lineation		45	0.8762	62.2	14.6	0.0875	173	53.8	0.0364	322.7	32.3
Rincon Valley N	Lineation		62	0.9053	69.8	4.3	0.0629	178.7	77	0.0319	338.9	12.2
Rincon Valley SE	Lineation		62	0.9387	247.4	3.9	0.039	360	80	0.0223	156.7	9.2
Sabino	Foliation pole	1	40	0.967	55.3	76.4	0.0187	179.2	7.7	0.0143	270.7	11.1	145.3	13.6
Sabino	Lineation	1	56	0.9905	247.6	13.9	0.0053	353.9	48.6	0.0041	146.4	38.1
Sabino N	Foliation pole	1a	11	0.9634	157.9	78.4	0.0344	350.4	11.3	0.0022	259.9	2.4	247.9	11.6
Sabino N	Lineation	1a	14	0.9869	56	5.9	0.0079	147.7	16.1	0.0052	306.6	72.8
Soldier Canyon, Lower	Foliation pole	3	35	0.9735	7.2	71.3	0.0208	169.3	17.9	0.0057	261	5.4	97.2	18.7
Soldier Canyon, Lower	Lineation	3	54	0.9854	246.3	9.1	0.0097	352.4	60	0.0049	151.3	28.3
Sycamore	Foliation pole	11	18	0.9431	190	72	0.0388	297.8	5.6	0.0182	29.5	16.9	280	18
Sycamore	Lineation	11	30	0.9473	42.8	17.5	0.0395	286.5	54.6	0.0133	143.2	29.7
Suizo Mts - Durham Hills	Foliation pole		128	0.8876	269.2	55.8	0.0779	31.5	20	0.0344	132	26.5	222	63.5
Suizo Mts	Lineation		98	0.94	65.9	24.3	0.0438	252.9	65.6	0.0162	157.1	2.6
Tanque Verde Ridge	Foliation pole	12	16	0.9217	72.9	4	0.0618	210.9	84.6	0.0165	342.6	3.6	162.9	86
Tanque Verde Ridge	Lineation	12	28	0.9675	239.4	16.1	0.0229	130	49	0.0096	341.7	36.4
Tanque Verde Falls	Lineation		17	0.9235	72.6	3.2	0.0607	197.2	84.3	0.0158	342.3	4.7
Tortolita SE	Lineation		94	0.8809	241.5	10.4	0.0785	44.2	79.1	0.0406	150.9	3.2
Tortolita SW	Lineation		260	0.904	59.3	1.7	0.0764	321.1	78.5	0.0195	149.7	11.4
West Spring canyon	Foliation pole	7	9	0.9795	277.1	72.8	0.0186	9.3	0.7	0.0019	99.5	17.2	7.1	17.2
West Spring canyon	Lineation	7	31	0.9752	33	10.8	0.019	138	53.6	0.0058	295.5	34.3
Windy Point N (Barnum - Green)	Lineation	14	15	0.9523	30.6	8.5	0.0383	141.1	66.9	0.0094	297.3	21.3
Windy Point S (Windy - Rose)	Lineation	13	20	0.9899	42.6	3	0.0073	178.2	85.8	0.0028	312.5	3			subset of following row
Windy Point S (Windy - Rose - Lizard)	Lineation	13	30	0.9782	40.3	2.6	0.0115	301.2	73.9	0.0103	131	15.9
			1866												1846 measurements total
Molino Canyon, lower	Foliation pole		19	0.97	5.4	77.9	0.0214	142.2	8.9	0.0086	233.5	8.1	95.4	12.1
Molino Basin (with middle Molino Canyon)	Foliation pole	6	21	0.9646	233	73.7	0.0296	330.9	2.3	0.0059	61.6	16.1	323	16.3
Molino Basin (with middle Molino Canyon)	Lineation	6	78	0.9643	47.5	11.9	0.0253	309.9	32.2	0.0104	155.1	55.2
Windy Point - Barnum Rock	Foliation pole	13, 14	4	0.9483	209.8	70.1	0.0478	352	16	0.0038	85.3	11.6	299.8	19.9
Windy Point - Barnum Rock	Lineation	13, 14	35	0.9615	37.7	5.3	0.0209	245.5	84	0.0176	127.9	2.8
Pontotoc (Banks MF-747) fol	Foliation pole		14	0.9651	8.9	65.4	0.0279	114.8	7.2	0.007	207.9	23.4	98.9	24.6
Pontotoc (Banks MF-747) lin	Lineation		14	0.9656	241.8	13.8	0.0304	337.1	20.7	0.004	120.5	64.7

## Sheet: Table S3. Catalina-Rincon Data
StationId	ID	Lat	Long	UtmN	UtmE	UtmDatum	UtmZone	UTMN 27	UTME 27	DateVisited	area	StationID	Trend (strike)	Plunge (dip)	Type	type 2	Shear sense	Group	CartoObjID
JES-02-189		32.3184	-110.784	3.57575e+06	520298	NAD83	12N			2001-12-29	Bear Canyon	JES-02-189	247	8	mylonitic lineation	trend and plunge		Sabino - Bear
JES-02-190		32.3196	-110.783	3.57588e+06	520443	NAD83	12N			2001-12-29	Bear Canyon	JES-02-190	67	3	mylonitic lineation	trend and plunge		Sabino - Bear
JES-02-191		32.3215	-110.78	3.5761e+06	520698	NAD83	12N			2001-12-29	Bear Canyon	JES-02-191	240	7	mylonitic lineation	trend and plunge		Sabino - Bear
JES-02-192		32.3233	-110.776	3.57629e+06	521066	NAD83	12N			2001-12-29	Bear Canyon	JES-02-192	247	6	mylonitic lineation	trend and plunge		Sabino - Bear
JES-03-581	JES-03-581	32.3613	-110.951	3.58049e+06	504594		12N	3580288	504656		Pusch Peak, S side	JES-03-581	233	8	ml, Mineral lineation, plunging	Footwall, Tgp		Pusch Peak
JES-03-581	JES-03-581	32.3613	-110.951	3.58049e+06	504594		12N	3580288	504656		Pusch Peak, S side	JES-03-581	48	22	my, Mylonitic foliation, mylonite	Footwall, Tgp		Pusch Peak
JES-03-583	JES-03-583	32.3608	-110.95	3.58043e+06	504700		12N	3580234	504762		Pusch Peak, S side	JES-03-583	284	18	ml, Mineral lineation, plunging	Footwall, Tgp		Pusch Peak
JES-03-583	JES-03-583	32.3608	-110.95	3.58043e+06	504700		12N	3580234	504762		Pusch Peak, S side	JES-03-583	84	39	my, Mylonitic foliation, mylonite	Footwall, Tgp		Pusch Peak
JES-03-584	JES-03-584	32.36	-110.949	3.58035e+06	504828		12N	3580149	504890		Pusch Peak, S side	JES-03-584	240	18	ml, Mineral lineation, plunging	Footwall, Tgp		Pusch Peak
JES-03-584	JES-03-584	32.36	-110.949	3.58035e+06	504828		12N	3580149	504890		Pusch Peak, S side	JES-03-584	90	25	my, Mylonitic foliation, mylonite	Footwall, Tgp		Pusch Peak
JES-03-585	JES-03-585	32.361	-110.948	3.58045e+06	504936		12N	3580253	504998		Pusch Peak, S side	JES-03-585	253	28	ml, Mineral lineation, plunging	Footwall, Tgp		Pusch Peak
JES-03-585	JES-03-585	32.361	-110.948	3.58045e+06	504936		12N	3580253	504998		Pusch Peak, S side	JES-03-585	104	38	my, Mylonitic foliation, mylonite	Footwall, Tgp		Pusch Peak
JES-03-586	JES-03-586	32.3619	-110.948	3.58055e+06	504924		12N	3580357	504986		Pusch Peak, S side	JES-03-586	247	20	ml, Mineral lineation, plunging	Footwall, Tgp		Pusch Peak
JES-03-586	JES-03-586	32.3619	-110.948	3.58055e+06	504924		12N	3580357	504986		Pusch Peak, S side	JES-03-586	106	34	my, Mylonitic foliation, mylonite	Footwall, Tgp		Pusch Peak
JES-03-587	JES-03-587	32.361	-110.944	3.58046e+06	505294		12N	3580259	505356		Pusch Peak, S side	JES-03-587	244	32	ml, Mineral lineation, plunging	Footwall, Tgp		Pusch Peak
JES-03-587	JES-03-587	32.361	-110.944	3.58046e+06	505294		12N	3580259	505356		Pusch Peak, S side	JES-03-587	122	36	my, Mylonitic foliation, mylonite	Footwall, Tgp		Pusch Peak
JES-03-588	JES-03-588	32.3599	-110.944	3.58033e+06	505283		12N	3580129	505345		Pusch Peak, S side	JES-03-588	249	18	ml, Mineral lineation, plunging	Footwall, Tgp		Pusch Peak
JES-03-588	JES-03-588	32.3599	-110.944	3.58033e+06	505283		12N	3580129	505345		Pusch Peak, S side	JES-03-588	115	28	my, Mylonitic foliation, mylonite	Footwall, Tgp		Pusch Peak
JES-03-590	JES-03-590	32.3596	-110.943	3.5803e+06	505395		12N	3580105	505457		Pusch Peak, S side	JES-03-590	235	5	ml, Mineral lineation, plunging	shear zone, Tgp		Pusch Peak
JES-03-590	JES-03-590	32.3596	-110.943	3.5803e+06	505395		12N	3580105	505457		Pusch Peak, S side	JES-03-590	88	22	my, Mylonitic foliation, mylonite	shear zone, Tgp		Pusch Peak
JES-03-591	JES-03-591	32.3608	-110.942	3.58044e+06	505433		12N	3580238	505495		Pusch Peak, S side	JES-03-591	234	23	ml, Mineral lineation, plunging	Footwall, Tgp		Pusch Peak
JES-03-591	JES-03-591	32.3608	-110.942	3.58044e+06	505433		12N	3580238	505495		Pusch Peak, S side	JES-03-591	154	23	my, Mylonitic foliation, mylonite	Footwall, Tgp		Pusch Peak
JES-03-592	JES-03-592	32.3613	-110.941	3.58048e+06	505549		12N	3580285	505611		Pusch Peak, S side	JES-03-592	256	6	ml, Mineral lineation, plunging	Footwall, Tgp		Pusch Peak
JES-03-592	JES-03-592	32.3613	-110.941	3.58048e+06	505549		12N	3580285	505611		Pusch Peak, S side	JES-03-592	90	35	my, Mylonitic foliation, mylonite	Footwall, Tgp		Pusch Peak
JES-03-594	JES-03-594	32.361	-110.939	3.58045e+06	505696		12N	3580251	505758		Pusch Peak, S side	JES-03-594	254	17	ml, Mineral lineation, plunging	Footwall, Tgp		Pusch Peak
JES-03-594	JES-03-594	32.361	-110.939	3.58045e+06	505696		12N	3580251	505758		Pusch Peak, S side	JES-03-594	195	28	my, Mylonitic foliation, mylonite	Footwall, Tgp		Pusch Peak
JES-03-595	JES-03-595	32.3607	-110.939	3.58042e+06	505705		12N	3580225	505767		Pusch Peak, S side	JES-03-595	245	16	ml, Mineral lineation, plunging	Footwall, Tgp		Pusch Peak
JES-03-595	JES-03-595	32.3607	-110.939	3.58042e+06	505705		12N	3580225	505767		Pusch Peak, S side	JES-03-595	113	26	my, Mylonitic foliation, mylonite	Footwall, Tgp		Pusch Peak
JES-03-598	JES-03-598	32.3585	-110.94	3.58018e+06	505658		12N	3579983	505720		Pusch Peak, S side	JES-03-598	234	15	ml, Mineral lineation, plunging	Footwall, Tgp		Pusch Peak
JES-03-598	JES-03-598	32.3585	-110.94	3.58018e+06	505658		12N	3579983	505720		Pusch Peak, S side	JES-03-598	130	10	my, Mylonitic foliation, mylonite	Footwall, Tgp		Pusch Peak
JES-03-636	JES-03-636	32.3621	-110.94	3.58058e+06	505615		12N	3580380	505677		Pusch Peak, S side	JES-03-636	243	27	ml, Mineral lineation, plunging	Footwall, Tgp		Pusch Peak
JES-03-636	JES-03-636	32.3621	-110.94	3.58058e+06	505615		12N	3580380	505677		Pusch Peak, S side	JES-03-636	122	35	my, Mylonitic foliation, mylonite	Footwall, Tgp		Pusch Peak
JES-03-637	JES-03-637	32.3628	-110.94	3.58066e+06	505662		12N	3580459	505724		Pusch Peak, S side	JES-03-637	248	16	ml, Mineral lineation, plunging	Footwall, Tgp		Pusch Peak
JES-03-637	JES-03-637	32.3628	-110.94	3.58066e+06	505662		12N	3580459	505724		Pusch Peak, S side	JES-03-637	97	29	my, Mylonitic foliation, mylonite	Footwall, Tgp		Pusch Peak
JES-03-638	JES-03-638	32.3631	-110.939	3.58069e+06	505758		12N	3580490	505820		Pusch Peak, S side	JES-03-638	246	16	ml, Mineral lineation, plunging	Footwall, Tgp		Pusch Peak
JES-03-638	JES-03-638	32.3631	-110.939	3.58069e+06	505758		12N	3580490	505820		Pusch Peak, S side	JES-03-638	101	20	my, Mylonitic foliation, mylonite	Footwall, Tgp		Pusch Peak
JES-03-639	JES-03-639	32.3635	-110.938	3.58073e+06	505813		12N	3580529	505875		Pusch Peak, S side	JES-03-639	243	20	ml, Mineral lineation, plunging	Footwall, Tgp		Pusch Peak
JES-03-639	JES-03-639	32.3635	-110.938	3.58073e+06	505813		12N	3580529	505875		Pusch Peak, S side	JES-03-639	130	25	my, Mylonitic foliation, mylonite	Footwall, Tgp		Pusch Peak
JES-03-640	JES-03-640	32.3637	-110.937	3.58075e+06	505899		12N	3580556	505961		Pusch Peak, S side	JES-03-640	237	23	ml, Mineral lineation, plunging	Footwall, Tgp		Pusch Peak
JES-03-640	JES-03-640	32.3637	-110.937	3.58075e+06	505899		12N	3580556	505961		Pusch Peak, S side	JES-03-640	111	27	my, Mylonitic foliation, mylonite	Footwall, Tgp		Pusch Peak
JES-03-641	JES-03-641	32.3642	-110.937	3.58081e+06	505900		12N	3580609	505962		Pusch Peak, S side	JES-03-641	249	21	ml, Mineral lineation, plunging	Footwall, Tgp		Pusch Peak
JES-03-641	JES-03-641	32.3642	-110.937	3.58081e+06	505900		12N	3580609	505962		Pusch Peak, S side	JES-03-641	103	31	my, Mylonitic foliation, mylonite	Footwall, Tgp		Pusch Peak
JES-03-642	JES-03-642	32.3651	-110.936	3.58091e+06	505980		12N	3580715	506042		Pusch Peak, S side	JES-03-642	245	22	ml, Mineral lineation, plunging	Footwall, Tgp		Pusch Peak
JES-03-642	JES-03-642	32.3651	-110.936	3.58091e+06	505980		12N	3580715	506042		Pusch Peak, S side	JES-03-642	95	41	my, Mylonitic foliation, mylonite	Footwall, Tgp		Pusch Peak
JES-03-643	JES-03-643	32.3655	-110.936	3.58095e+06	506013		12N	3580754	506075		Pusch Peak, S side	JES-03-643	247	32	ml, Mineral lineation, plunging	Footwall, Tgp		Pusch Peak
JES-03-643	JES-03-643	32.3655	-110.936	3.58095e+06	506013		12N	3580754	506075		Pusch Peak, S side	JES-03-643	124	38	my, Mylonitic foliation, mylonite	Footwall, Tgp		Pusch Peak
JES-03-644	JES-03-644	32.3663	-110.935	3.58104e+06	506076		12N	3580839	506138		Pusch Peak, S side	JES-03-644	247	26	ml, Mineral lineation, plunging	Footwall, Tgp		Pusch Peak
JES-03-644	JES-03-644	32.3663	-110.935	3.58104e+06	506076		12N	3580839	506138		Pusch Peak, S side	JES-03-644	111	40	my, Mylonitic foliation, mylonite	Footwall, Tgp		Pusch Peak
JES-03-645	JES-03-645	32.3678	-110.936	3.58121e+06	506021		12N	3581013	506083		Pusch Peak, S side	JES-03-645	249	38	ml, Mineral lineation, plunging	Footwall, Tgp		Pusch Peak
JES-03-645	JES-03-645	32.3678	-110.936	3.58121e+06	506021		12N	3581013	506083		Pusch Peak, S side	JES-03-645	128	41	my, Mylonitic foliation, mylonite	Footwall, Tgp		Pusch Peak
JES-03-646	JES-03-646	32.3687	-110.936	3.58131e+06	505978		12N	3581112	506040		Pusch Peak, S side	JES-03-646	244	22	ml, Mineral lineation, plunging	Footwall, Xp		Pusch Peak
JES-03-646	JES-03-646	32.3687	-110.936	3.58131e+06	505978		12N	3581112	506040		Pusch Peak, S side	JES-03-646	151	20	my, Mylonitic foliation, mylonite	Footwall, Xp		Pusch Peak
JES-03-647	JES-03-647	32.3698	-110.937	3.58143e+06	505921		12N	3581228	505983		Pusch Peak, S side	JES-03-647	242	18	ml, Mineral lineation, plunging	Footwall, Tgp		Pusch Peak
JES-03-648	JES-03-648	32.3705	-110.937	3.58151e+06	505898		12N	3581308	505960		Pusch Peak, S side	JES-03-648	245	23	ml, Mineral lineation, plunging	Footwall, Tgp		Pusch Peak
JES-03-648	JES-03-648	32.3705	-110.937	3.58151e+06	505898		12N	3581308	505960		Pusch Peak, S side	JES-03-648	106	29	myp, Mylonitic foliation, protomylonite	Footwall, Tgp		Pusch Peak
JES-03-649	JES-03-649	32.3713	-110.938	3.5816e+06	505860		12N	3581402	505922		Pusch Peak, S side	JES-03-649	239	18	ml, Mineral lineation, plunging	Footwall, Tgp		Pusch Peak
JES-03-649	JES-03-649	32.3713	-110.938	3.5816e+06	505860		12N	3581402	505922		Pusch Peak, S side	JES-03-649	84	29	myp, Mylonitic foliation, protomylonite	Footwall, Tgp		Pusch Peak
JES-03-650	JES-03-650	32.3719	-110.939	3.58166e+06	505760		12N	3581460	505822		Pusch Peak, S side	JES-03-650	239	15	ml, Mineral lineation, plunging	Footwall, Tgp		Pusch Peak
JES-03-651	JES-03-651	32.3722	-110.939	3.5817e+06	505732		12N	3581501	505794		Pusch Peak, S side	JES-03-651	250	6	ml, Mineral lineation, plunging	Footwall, Xp		Pusch Peak
JES-03-653	JES-03-653	32.3706	-110.943	3.58152e+06	505366		12N	3581324	505428		Pusch Peak, S side	JES-03-653	255	30	ml, Mineral lineation, plunging	Footwall, Tgp		Pusch Peak
JES-03-654	JES-03-654	32.3693	-110.946	3.58137e+06	505046		12N	3581173	505108		Pusch Peak, S side	JES-03-654	251	28	ml, Mineral lineation, plunging	Footwall, Xp		Pusch Peak
JES-03-655	JES-03-655	32.3714	-110.947	3.58161e+06	504959		12N	3581412	505021		Pusch Peak, S side	JES-03-655	237	33	ml, Mineral lineation, plunging	Footwall, Tgp		Pusch Peak
JES-03-676	JES-03-676	32.3588	-110.934	3.58021e+06	506240		12N	3580010	506302		Pusch Peak, S side	JES-03-676	254	28	ml, Mineral lineation, plunging	Footwall, Tgp		Pusch Peak
JES-03-676	JES-03-676	32.3588	-110.934	3.58021e+06	506240		12N	3580010	506302		Pusch Peak, S side	JES-03-676	113	37	my, Mylonitic foliation, mylonite	Footwall, Tgp		Pusch Peak
JES-03-677	JES-03-677	32.3591	-110.933	3.58024e+06	506338		12N	3580047	506400		Pusch Peak, S side	JES-03-677	250	23	ml, Mineral lineation, plunging	Footwall, Tgp		Pusch Peak
JES-03-677	JES-03-677	32.3591	-110.933	3.58024e+06	506338		12N	3580047	506400		Pusch Peak, S side	JES-03-677	135	27	my, Mylonitic foliation, mylonite	Footwall, Tgp		Pusch Peak
JES-03-678	JES-03-678	32.3595	-110.931	3.58028e+06	506521		12N	3580085	506583		Pusch Peak, S side	JES-03-678	247	20	ml, Mineral lineation, plunging	Footwall, Tgp		Pusch Peak
JES-03-678	JES-03-678	32.3595	-110.931	3.58028e+06	506521		12N	3580085	506583		Pusch Peak, S side	JES-03-678	130	22	my, Mylonitic foliation, mylonite	Footwall, Tgp		Pusch Peak
JES-03-679	JES-03-679	32.361	-110.928	3.58045e+06	506731		12N	3580252	506793		Pusch Peak, S side	JES-03-679	250	17	ml, Mineral lineation, plunging	Footwall, Yg		Pusch Peak
JES-03-679	JES-03-679	32.361	-110.928	3.58045e+06	506731		12N	3580252	506793		Pusch Peak, S side	JES-03-679	128	22	my, Mylonitic foliation, mylonite	Footwall, Yg		Pusch Peak
JES-03-680	JES-03-680	32.3618	-110.927	3.58055e+06	506885		12N	3580350	506947		Pusch Peak, S side	JES-03-680	250	18	ml, Mineral lineation, plunging	Footwall, Yg		Pusch Peak
JES-03-681	JES-03-681	32.3631	-110.925	3.58069e+06	507009		12N	3580492	507071		Pusch Peak, S side	JES-03-681	251	20	ml, Mineral lineation, plunging	Footwall, Yg		Pusch Peak
JES-03-682	JES-03-682	32.3639	-110.924	3.58077e+06	507121		12N	3580575	507183		Pusch Peak, S side	JES-03-682	253	18	ml, Mineral lineation, plunging	Footwall, Yg		Pusch Peak
JES-03-683	JES-03-683	32.3653	-110.924	3.58093e+06	507150		12N	3580735	507212		Pusch Peak, S side	JES-03-683	260	18	ml, Mineral lineation, plunging	Footwall, Yg		Pusch Peak
JES-03-683	JES-03-683	32.3653	-110.924	3.58093e+06	507150		12N	3580735	507212		Pusch Peak, S side	JES-03-683	167	18	my, Mylonitic foliation, mylonite	Footwall, Yg		Pusch Peak
JES-03-685	JES-03-685	32.3668	-110.926	3.58109e+06	506929		12N	3580894	506991		Pusch Peak, S side	JES-03-685	241	27	ml, Mineral lineation, plunging	Yg		Pusch Peak
JES-03-686	JES-03-686	32.3672	-110.927	3.58114e+06	506855		12N	3580941	506917		Pusch Peak, S side	JES-03-686	254	21	ml, Mineral lineation, plunging	Footwall, Yg		Pusch Peak
JES-03-686	JES-03-686	32.3672	-110.927	3.58114e+06	506855		12N	3580941	506917		Pusch Peak, S side	JES-03-686	109	34	my, Mylonitic foliation, mylonite	Footwall, Yg		Pusch Peak
JES-03-687	JES-03-687	32.3677	-110.928	3.58119e+06	506794		12N	3580994	506856		Pusch Peak, S side	JES-03-687	256	15	ml, Mineral lineation, plunging	Footwall, Tgp		Pusch Peak
JES-03-687	JES-03-687	32.3677	-110.928	3.58119e+06	506794		12N	3580994	506856		Pusch Peak, S side	JES-03-687	117	22	my, Mylonitic foliation, mylonite	Footwall, Tgp		Pusch Peak
JES-03-688	JES-03-688	32.3674	-110.929	3.58116e+06	506702		12N	3580967	506764		Pusch Peak, S side	JES-03-688	250	25	ml, Mineral lineation, plunging	Footwall, Yg		Pusch Peak
JES-03-688	JES-03-688	32.3674	-110.929	3.58116e+06	506702		12N	3580967	506764		Pusch Peak, S side	JES-03-688	135	30	my, Mylonitic foliation, mylonite	Footwall, Yg		Pusch Peak
JES-03-689	JES-03-689	32.3684	-110.929	3.58127e+06	506679		12N	3581076	506741		Pusch Peak, S side	JES-03-689	253	17	ml, Mineral lineation, plunging	Footwall, Tgp		Pusch Peak
JES-03-689	JES-03-689	32.3684	-110.929	3.58127e+06	506679		12N	3581076	506741		Pusch Peak, S side	JES-03-689	142	27	my, Mylonitic foliation, mylonite	Footwall, Tgp		Pusch Peak
JES-03-690	JES-03-690	32.3696	-110.929	3.5814e+06	506641		12N	3581204	506703		Pusch Peak, S side	JES-03-690	258	23	ml, Mineral lineation, plunging	Footwall, Tgp		Pusch Peak
JES-03-690	JES-03-690	32.3696	-110.929	3.5814e+06	506641		12N	3581204	506703		Pusch Peak, S side	JES-03-690	119	30	my, Mylonitic foliation, mylonite	Footwall, Tgp		Pusch Peak
JES-03-694	JES-03-694	32.3637	-110.929	3.58075e+06	506694		12N	3580553	506756		Pusch Peak, S side	JES-03-694	246	20	ml, Mineral lineation, plunging	Footwall, Yg		Pusch Peak
JES-03-694	JES-03-694	32.3637	-110.929	3.58075e+06	506694		12N	3580553	506756		Pusch Peak, S side	JES-03-694	139	23	my, Mylonitic foliation, mylonite	Footwall, Yg		Pusch Peak
JES-03-695	JES-03-695	32.3625	-110.929	3.58062e+06	506709		12N	3580423	506771		Pusch Peak, S side	JES-03-695	243	22	ml, Mineral lineation, plunging	Footwall, Yg		Pusch Peak
JES-03-695	JES-03-695	32.3625	-110.929	3.58062e+06	506709		12N	3580423	506771		Pusch Peak, S side	JES-03-695	144	23	my, Mylonitic foliation, mylonite	Footwall, Yg		Pusch Peak
JES-03-980	JES-03-980	32.3572	-110.937	3.58003e+06	505965		12N	3579832	506027		Pusch Peak, S side	JES-03-980	247	32.8593	ml, Mineral lineation, plunging	Footwall, Tgp		Pusch Peak
JES-03-980	JES-03-980	32.3572	-110.937	3.58003e+06	505965		12N	3579832	506027		Pusch Peak, S side	JES-03-980	126	37	my, Mylonitic foliation, mylonite	Footwall, Tgp		Pusch Peak
JES-03-981	JES-03-981	32.3572	-110.934	3.58003e+06	506195		12N	3579829	506257		Pusch Peak, S side	JES-03-981	251	26.9787	ml, Mineral lineation, plunging	Footwall, Tgp		Pusch Peak
JES-03-981	JES-03-981	32.3572	-110.934	3.58003e+06	506195		12N	3579829	506257		Pusch Peak, S side	JES-03-981	120	34	my, Mylonitic foliation, mylonite	Footwall, Tgp		Pusch Peak
JES-04-446	JES-04-446	32.2514	-110.665	3.56835e+06	531532	NAD 83	12N	3568155	531593	2004-03-16	Tanque Verde falls	JES-04-446	260	20	mylonitic lineation			Tanque Verde Falls
JES-04-447	JES-04-447	32.2514	-110.665	3.56835e+06	531600	NAD 83	12N	3568153	531661	2004-03-16	Tanque Verde falls	JES-04-447	80	7	mylonitic lineation			Tanque Verde Falls
JES-04-448	JES-04-448	32.2564	-110.654	3.56891e+06	532589	NAD 83	12N	3568709	532650	2004-03-16	Tanque Verde falls	JES-04-448	76	11	mylonitic lineation			Tanque Verde Falls
JES-04-449	JES-04-449	32.2561	-110.654	3.56888e+06	532592	NAD 83	12N	3568680	532653	2004-03-16	Tanque Verde falls	JES-04-449	254	22	mylonitic lineation			Tanque Verde Falls
JES-04-450	JES-04-450	32.2561	-110.654	3.56888e+06	532603	NAD 83	12N	3568682	532664	2004-03-16	Tanque Verde falls	JES-04-450	235	17	mylonitic lineation			Tanque Verde Falls
JES-04-451	JES-04-451	32.2557	-110.655	3.56883e+06	532511	NAD 83	12N	3568631	532572	2004-03-16	Tanque Verde falls	JES-04-451	71	28	mylonitic lineation			Tanque Verde Falls
JES-04-452	JES-04-452	32.2557	-110.655	3.56883e+06	532521	NAD 83	12N	3568629	532582	2004-03-16	Tanque Verde falls	JES-04-452	74	25	mylonitic lineation			Tanque Verde Falls
JES-04-453	JES-04-453	32.26	-110.654	3.56931e+06	532620	NAD 83	12N	3569109	532681	2004-03-16	Tanque Verde falls	JES-04-453	266	6	mylonitic lineation			Tanque Verde Falls
JES-04-454	JES-04-454	32.26	-110.653	3.56931e+06	532673	NAD 83	12N	3569112	532734	2004-03-16	Tanque Verde falls	JES-04-454	83	4	mylonitic lineation			Tanque Verde Falls
JES-04-457	JES-04-457	32.2568	-110.655	3.56896e+06	532476	NAD 83	12N	3568759	532537	2004-03-16	Tanque Verde falls	JES-04-457	69	5	mylonitic lineation			Tanque Verde Falls
JES-04-458	JES-04-458	32.2567	-110.654	3.56895e+06	532580	NAD 83	12N	3568749	532641	2004-03-16	Tanque Verde falls	JES-04-458	69	13	mylonitic lineation			Tanque Verde Falls
JES-04-459	JES-04-459	32.257	-110.653	3.56897e+06	532647	NAD 83	12N	3568778	532708	2004-03-16	Tanque Verde falls	JES-04-459	70	10	mylonitic lineation			Tanque Verde Falls
JES-04-460	JES-04-460	32.257	-110.653	3.56898e+06	532652	NAD 83	12N	3568784	532713	2004-03-16	Tanque Verde falls	JES-04-460	75	15	mylonitic lineation			Tanque Verde Falls
JES-04-461	JES-04-461	32.2545	-110.659	3.56869e+06	532135	NAD 83	12N	3568495	532196	2004-03-16	Tanque Verde falls	JES-04-461	75	14	mylonitic lineation			Tanque Verde Falls
JES-04-462	JES-04-462	32.2541	-110.659	3.56866e+06	532077	NAD 83	12N	3568460	532138	2004-03-16	Tanque Verde falls	JES-04-462	61	2	mylonitic lineation			Tanque Verde Falls
JES-04-463	JES-04-463	32.2553	-110.66	3.56879e+06	532062	NAD 83	12N	3568589	532123	2004-03-16	Tanque Verde falls	JES-04-463	247	10	mylonitic lineation			Tanque Verde Falls
JES-04-464	JES-04-464	32.3369	-110.688	3.57782e+06	529354			3577623	529415	2004-03-18	Molino basin ridge to E	JES-04-464	42	18	ml, Mineral lineation, plunging			Molino-Soldier
JES-04-465	JES-04-465	32.337	-110.687	3.57783e+06	529412			3577635	529473	2004-03-18	Molino basin ridge to E	JES-04-465	39	20	ml, Mineral lineation, plunging			Molino-Soldier
JES-04-466	JES-04-466	32.3371	-110.687	3.57784e+06	529497			3577643	529558	2004-03-18	Molino basin ridge to E	JES-04-466	37	26	ml, Mineral lineation, plunging			Molino-Soldier
JES-04-467	JES-04-467	32.3377	-110.686	3.57792e+06	529571			3577719	529632	2004-03-18	Molino basin ridge to E	JES-04-467	45	15	ml, Mineral lineation, plunging			Molino-Soldier
JES-04-468	JES-04-468	32.3378	-110.685	3.57792e+06	529626			3577722	529687	2004-03-18	Molino basin ridge to E	JES-04-468	223	4	ml, Mineral lineation, plunging			Molino-Soldier
JES-04-469	JES-04-469	32.3373	-110.685	3.57786e+06	529635			3577666	529696	2004-03-18	Molino basin ridge to E	JES-04-469	37	9	ml, Mineral lineation, plunging			Molino-Soldier
JES-04-470	JES-04-470	32.3377	-110.684	3.57791e+06	529742			3577714	529803	2004-03-18	Molino basin ridge to E	JES-04-470	49	19	ml, Mineral lineation, plunging			Molino-Soldier
JES-04-471	JES-04-471	32.3377	-110.684	3.57791e+06	529764			3577711	529825	2004-03-18	Molino basin ridge to E	JES-04-471	48	8	ml, Mineral lineation, plunging			Molino-Soldier
JES-04-472	JES-04-472	32.338	-110.683	3.57794e+06	529811			3577744	529872	2004-03-18	Molino basin ridge to E	JES-04-472	50	3	ml, Mineral lineation, plunging			Molino-Soldier
JES-04-473	JES-04-473	32.3375	-110.683	3.5779e+06	529791			3577698	529852	2004-03-18	Molino basin ridge to E	JES-04-473	45	19	ml, Mineral lineation, plunging			Molino-Soldier
JES-04-474	JES-04-474	32.3375	-110.683	3.57789e+06	529815			3577690	529876	2004-03-18	Molino basin ridge to E	JES-04-474	49	4	ml, Mineral lineation, plunging			Molino-Soldier
JES-04-475	JES-04-475	32.3379	-110.683	3.57793e+06	529833			3577734	529894	2004-03-18	Molino basin ridge to E	JES-04-475	317	6	myg, Mylonitic foliation, generic	parallel to lithologic layering		Molino-Soldier
JES-04-475	JES-04-475	32.3379	-110.683	3.57793e+06	529833			3577734	529894	2004-03-18	Molino basin ridge to E	JES-04-475	43	7	lt, Lineation, generic tectonic			Molino-Soldier
JES-04-476	JES-04-476	32.3377	-110.683	3.57791e+06	529879			3577713	529940	2004-03-18	Molino basin ridge to E	JES-04-476	50	10	ml, Mineral lineation, plunging			Molino-Soldier
JES-04-477	JES-04-477	32.3374	-110.682	3.57788e+06	529917			3577680	529978	2004-03-18	Molino basin ridge to E	JES-04-477	353	10	myg, Mylonitic foliation, generic	parallel to lithologic layering		Molino-Soldier
JES-04-477	JES-04-477	32.3374	-110.682	3.57788e+06	529917			3577680	529978	2004-03-18	Molino basin ridge to E	JES-04-477	44	17	lt, Lineation, generic tectonic			Molino-Soldier
JES-04-478	JES-04-478	32.336	-110.682	3.57772e+06	529952			3577527	530013	2004-03-18	Molino basin ridge to E	JES-04-478	334	20	myg, Mylonitic foliation, generic	parallel to lithologic layering		Molino-Soldier
JES-04-478	JES-04-478	32.336	-110.682	3.57772e+06	529952			3577527	530013	2004-03-18	Molino basin ridge to E	JES-04-478	45	24	lt, Lineation, generic tectonic	Ethan Perry collected two oriented samples here		Molino-Soldier
JES-04-479	JES-04-479	32.3357	-110.681	3.57769e+06	529990			3577491	530051	2004-03-18	Molino basin ridge to E	JES-04-479	39	12	ml, Mineral lineation, plunging			Molino-Soldier
JES-04-480	JES-04-480	32.3352	-110.682	3.57763e+06	529953			3577437	530014	2004-03-18	Molino basin ridge to E	JES-04-480	49	2	ml, Mineral lineation, plunging			Molino-Soldier
JES-04-481	JES-04-481	32.335	-110.682	3.57762e+06	529955			3577419	530016	2004-03-18	Molino basin ridge to E	JES-04-481	45	7	ml, Mineral lineation, plunging			Molino-Soldier
JES-04-482	JES-04-482	32.3354	-110.681	3.57766e+06	530023			3577463	530084	2004-03-18	Molino basin ridge to E	JES-04-482	42	13	ml, Mineral lineation, plunging			Molino-Soldier
JES-04-483	JES-04-483	32.3354	-110.681	3.57766e+06	530036			3577462	530097	2004-03-18	Molino basin ridge to E	JES-04-483	356	12	myg, Mylonitic foliation, generic	parallel to lithologic layering		Molino-Soldier
JES-04-483	JES-04-483	32.3354	-110.681	3.57766e+06	530036			3577462	530097	2004-03-18	Molino basin ridge to E	JES-04-483	44	12	lt, Lineation, generic tectonic			Molino-Soldier
JES-04-484	JES-04-484	32.3357	-110.681	3.57769e+06	530054			3577493	530115	2004-03-18	Molino basin ridge to E	JES-04-484	44	6	ml, Mineral lineation, plunging			Molino-Soldier
JES-04-486	JES-04-486	32.3356	-110.68	3.57768e+06	530090			3577479	530151	2004-03-18	Molino basin ridge to E	JES-04-486	48	11	ml, Mineral lineation, plunging			Molino-Soldier
JES-04-487	JES-04-487	32.3353	-110.68	3.57764e+06	530099			3577446	530160	2004-03-18	Molino basin ridge to E	JES-04-487	52	8	ml, Mineral lineation, plunging			Molino-Soldier
JES-04-488	JES-04-488	32.3352	-110.68	3.57763e+06	530099			3577434	530160	2004-03-18	Molino basin ridge to E	JES-04-488	42	14	ml, Mineral lineation, plunging			Molino-Soldier
JES-04-489	JES-04-489	32.335	-110.68	3.57762e+06	530132			3577420	530193	2004-03-18	Molino basin ridge to E	JES-04-489	41	2	ml, Mineral lineation, plunging			Molino-Soldier
JES-04-490	JES-04-490	32.3343	-110.68	3.57754e+06	530117			3577343	530178	2004-03-18	Molino basin ridge to E	JES-04-490	42	7	ml, Mineral lineation, plunging			Molino-Soldier
JES-04-491	JES-04-491	32.3342	-110.681	3.57752e+06	530066			3577323	530127	2004-03-18	Molino basin ridge to E	JES-04-491	45	18	ml, Mineral lineation, plunging			Molino-Soldier
JES-04-492	JES-04-492	32.3337	-110.681	3.57747e+06	530049			3577273	530110	2004-03-18	Molino basin ridge to E	JES-04-492	47	6	ml, Mineral lineation, plunging			Molino-Soldier
JES-04-493	JES-04-493	32.332	-110.681	3.57728e+06	529980			3577081	530041	2004-03-18	Molino basin ridge to E	JES-04-493	45	12	ml, Mineral lineation, plunging			Molino-Soldier
JES-04-494	JES-04-494	32.3316	-110.682	3.57724e+06	529965			3577042	530026	2004-03-18	Molino basin ridge to E	JES-04-494	47	14	ml, Mineral lineation, plunging			Molino-Soldier
JES-04-495	JES-04-495	32.3313	-110.682	3.57721e+06	529919			3577010	529980	2004-03-18	Molino basin ridge to E	JES-04-495	49	12	ml, Mineral lineation, plunging			Molino-Soldier
JES-04-496	JES-04-496	32.3312	-110.683	3.57719e+06	529853			3576990	529914	2004-03-18	Molino basin ridge to E	JES-04-496	49	8	ml, Mineral lineation, plunging			Molino-Soldier
JES-04-497	JES-04-497	32.3316	-110.685	3.57723e+06	529651			3577037	529712	2004-03-18	Molino basin ridge to E	JES-04-497	51	11	ml, Mineral lineation, plunging			Molino-Soldier
JES-04-498	JES-04-498	32.3317	-110.685	3.57725e+06	529615			3577054	529676	2004-03-18	Molino basin ridge to E	JES-04-498	57	9	ml, Mineral lineation, plunging			Molino-Soldier
JES-04-499	JES-04-499	32.3318	-110.686	3.57726e+06	529551			3577061	529612	2004-03-18	Molino basin ridge to E	JES-04-499	53	9	ml, Mineral lineation, plunging			Molino-Soldier
JES-04-500	JES-04-500	32.3316	-110.688	3.57724e+06	529399			3577042	529460	2004-03-18	Molino basin ridge to E	JES-04-500	49	17	ml, Mineral lineation, plunging			Molino-Soldier
JES-04-501	JES-04-501	32.3313	-110.689	3.5772e+06	529295			3577003	529356	2004-03-18	Molino basin ridge to E	JES-04-501	52	10	ml, Mineral lineation, plunging			Molino-Soldier
JES-04-502	JES-04-502	32.3314	-110.689	3.57721e+06	529287			3577016	529348	2004-03-18	Molino basin ridge to E	JES-04-502	48	8	ml, Mineral lineation, plunging			Molino-Soldier
JES-04-503	JES-04-503	32.3313	-110.689	3.57721e+06	529241			3577009	529302	2004-03-18	Molino basin ridge to E	JES-04-503	54	14	ml, Mineral lineation, plunging			Molino-Soldier
JES-04-504	JES-04-504	32.3314	-110.69	3.57722e+06	529154			3577019	529215	2004-03-18	Molino basin ridge to E	JES-04-504	52	20	ml, Mineral lineation, plunging			Molino-Soldier
JES-04-505	JES-04-505	32.3315	-110.691	3.57723e+06	529064			3577030	529125	2004-03-18	Molino basin ridge to E	JES-04-505	51	15	ml, Mineral lineation, plunging			Molino-Soldier
JES-04-506	JES-04-506	32.3317	-110.691	3.57724e+06	529052			3577046	529113	2004-03-18	Molino basin ridge to E	JES-04-506	51	18	ml, Mineral lineation, plunging			Molino-Soldier
JES-04-507	JES-04-507	32.3324	-110.693	3.57733e+06	528898			3577129	528959	2004-03-18	Molino basin ridge to E	JES-04-507	50	20	ml, Mineral lineation, plunging			Molino-Soldier
JES-04-508	JES-04-508	32.333	-110.695	3.57739e+06	528751			3577188	528812	2004-03-18	Molino basin ridge to E	JES-04-508	306	21	myg, Mylonitic foliation, generic	parallel to lithologic layering		Molino-Soldier
JES-04-508	JES-04-508	32.333	-110.695	3.57739e+06	528751			3577188	528812	2004-03-18	Molino basin ridge to E	JES-04-508	50	18	lt, Lineation, generic tectonic			Molino-Soldier
JES-04-509	JES-04-509	32.3344	-110.695	3.57755e+06	528713			3577348	528774	2004-03-18	Molino basin ridge to E	JES-04-509	44	19	ml, Mineral lineation, plunging			Molino-Soldier
JES-04-510	JES-04-510	32.3354	-110.694	3.57766e+06	528838			3577458	528899	2004-03-18	Molino basin ridge to E	JES-04-510	53	18	ml, Mineral lineation, plunging			Molino-Soldier
JES-04-511	JES-04-511	32.3363	-110.692	3.57775e+06	528949			3577556	529010	2004-03-18	Molino basin ridge to E	JES-04-511	47	20	ml, Mineral lineation, plunging			Molino-Soldier
JES-04-752	JES-04-752	32.34	-110.686	3.57816e+06	529523			3577964	529584	2004-04-19	Molino basin near E	JES-04-752	38	15	ml, Mineral lineation, plunging			Molino-Soldier
JES-04-753	JES-04-753	32.3404	-110.685	3.57821e+06	529621			3578012	529682	2004-04-19	Molino basin near E	JES-04-753	285	22	myg, Mylonitic foliation, generic			Molino-Soldier
JES-04-753	JES-04-753	32.3404	-110.685	3.57821e+06	529621			3578012	529682	2004-04-19	Molino basin near E	JES-04-753	40	20	sld, stretching lineation, directed down-plunge		NE	Molino-Soldier
JES-04-754	JES-04-754	32.3403	-110.684	3.5782e+06	529706			3577999	529767	2004-04-19	Molino basin near E	JES-04-754	292	20	myg, Mylonitic foliation, generic			Molino-Soldier
JES-04-754	JES-04-754	32.3403	-110.684	3.5782e+06	529706			3577999	529767	2004-04-19	Molino basin near E	JES-04-754	39	19	sld, stretching lineation, directed down-plunge		NE	Molino-Soldier
JES-04-755	JES-04-755	32.3411	-110.684	3.57829e+06	529760			3578091	529821	2004-04-19	Molino basin near E	JES-04-755	340	20	myg, Mylonitic foliation, generic			Molino-Soldier
JES-04-755	JES-04-755	32.3411	-110.684	3.57829e+06	529760			3578091	529821	2004-04-19	Molino basin near E	JES-04-755	42	17	lt, Lineation, generic tectonic			Molino-Soldier
JES-04-756	JES-04-756	32.3423	-110.684	3.57842e+06	529769			3578221	529830	2004-04-19	Molino basin near E	JES-04-756	41	26	ml, Mineral lineation, plunging			Molino-Soldier
JES-04-757	JES-04-757	32.3434	-110.684	3.57855e+06	529714			3578350	529775	2004-04-19	Molino basin near E	JES-04-757	340	23	myg, Mylonitic foliation, generic			Molino-Soldier
JES-04-757	JES-04-757	32.3434	-110.684	3.57855e+06	529714			3578350	529775	2004-04-19	Molino basin near E	JES-04-757	35	12	sld, stretching lineation, directed down-plunge		NE	Molino-Soldier
JES-04-758	JES-04-758	32.3445	-110.683	3.57866e+06	529841			3578465	529902	2004-04-19	Molino basin near E	JES-04-758	41	11	ml, Mineral lineation, plunging			Molino-Soldier
JES-04-759	JES-04-759	32.3447	-110.682	3.57868e+06	529916			3578486	529977	2004-04-19	Molino basin near E	JES-04-759	40	8	ml, Mineral lineation, plunging			Molino-Soldier
JES-04-760	JES-04-760	32.3449	-110.681	3.57871e+06	529979			3578513	530040	2004-04-19	Molino basin near E	JES-04-760	25	16	ml, Mineral lineation, plunging			Molino-Soldier
JES-04-761	JES-04-761	32.3458	-110.68	3.57881e+06	530080			3578614	530141	2004-04-19	Molino basin near E	JES-04-761	359	22	myg, Mylonitic foliation, generic	coarse leucogranite.		Molino-Soldier
JES-04-761	JES-04-761	32.3458	-110.68	3.57881e+06	530080			3578614	530141	2004-04-19	Molino basin near E	JES-04-761	30	11	lt, Lineation, generic tectonic			Molino-Soldier
JES-04-762	JES-04-762	32.3457	-110.68	3.5788e+06	530106			3578598	530167	2004-04-19	Molino basin near E	JES-04-762	351	21	myg, Mylonitic foliation, generic	coarse leucogranite.		Molino-Soldier
JES-04-762	JES-04-762	32.3457	-110.68	3.5788e+06	530106			3578598	530167	2004-04-19	Molino basin near E	JES-04-762	34	10	lt, Lineation, generic tectonic			Molino-Soldier
JES-04-763	JES-04-763	32.3464	-110.68	3.57887e+06	530148			3578677	530209	2004-04-19	Molino basin near E	JES-04-763	0	20	myg, Mylonitic foliation, generic	coarse leucogranite.		Molino-Soldier
JES-04-763	JES-04-763	32.3464	-110.68	3.57887e+06	530148			3578677	530209	2004-04-19	Molino basin near E	JES-04-763	37	9	sld, stretching lineation, directed down-plunge		NE	Molino-Soldier
JES-04-764	JES-04-764	32.3479	-110.678	3.57905e+06	530277			3578848	530338	2004-04-19	Molino basin near E	JES-04-764	340	22	myg, Mylonitic foliation, generic			Molino-Soldier
JES-04-764	JES-04-764	32.3479	-110.678	3.57905e+06	530277			3578848	530338	2004-04-19	Molino basin near E	JES-04-764	32	10	lt, Lineation, generic tectonic			Molino-Soldier
JES-04-769	JES-04-769	32.3087	-110.736	3.57469e+06	524832			3574489	524893	2004-04-19	Lower Mt. Lemmon Hwy	JES-04-769	242	18	ml, Mineral lineation, plunging			Molino-Soldier
JES-04-770	JES-04-770	32.3088	-110.737	3.57469e+06	524793			3574496	524854	2004-04-19	Lower Mt. Lemmon Hwy	JES-04-770	106	20	myg, Mylonitic foliation, generic			Molino-Soldier
JES-04-770	JES-04-770	32.3088	-110.737	3.57469e+06	524793			3574496	524854	2004-04-19	Lower Mt. Lemmon Hwy	JES-04-770	249	11	lt, Lineation, generic tectonic			Molino-Soldier
JES-04-771	JES-04-771	32.3088	-110.737	3.57469e+06	524714			3574497	524775	2004-04-19	Lower Mt. Lemmon Hwy	JES-04-771	102	20	myg, Mylonitic foliation, generic			Molino-Soldier
JES-04-771	JES-04-771	32.3088	-110.737	3.57469e+06	524714			3574497	524775	2004-04-19	Lower Mt. Lemmon Hwy	JES-04-771	246	10	sld, stretching lineation, directed down-plunge		SW	Molino-Soldier
JES-04-772	JES-04-772	32.3088	-110.735	3.5747e+06	524967			3574503	525028	2004-04-19	Lower Mt. Lemmon Hwy	JES-04-772	128	22	myg, Mylonitic foliation, generic			Molino-Soldier
JES-04-772	JES-04-772	32.3088	-110.735	3.5747e+06	524967			3574503	525028	2004-04-19	Lower Mt. Lemmon Hwy	JES-04-772	251	19	lt, Lineation, generic tectonic			Molino-Soldier
JES-04-773	JES-04-773	32.3093	-110.739	3.57476e+06	524527			3574558	524588	2004-04-19	Lower Mt. Lemmon Hwy	JES-04-773	245	8	ml, Mineral lineation, plunging			Molino-Soldier
JES-04-774	JES-04-774	32.3086	-110.74	3.57467e+06	524481			3574472	524542	2004-04-19	Lower Mt. Lemmon Hwy	JES-04-774	76	30	myg, Mylonitic foliation, generic			Molino-Soldier
JES-04-774	JES-04-774	32.3086	-110.74	3.57467e+06	524481			3574472	524542	2004-04-19	Lower Mt. Lemmon Hwy	JES-04-774	243	9	sld, stretching lineation, directed down-plunge		SW	Molino-Soldier
JES-04-775	JES-04-775	32.312	-110.742	3.57505e+06	524259			3574850	524320	2004-04-19	Lower Mt. Lemmon Hwy	JES-04-775	243	10	ml, Mineral lineation, plunging			Molino-Soldier
JES-04-776	JES-04-776	32.3118	-110.741	3.57503e+06	524377			3574831	524438	2004-04-19	Lower Mt. Lemmon Hwy	JES-04-776	246	10	ml, Mineral lineation, plunging			Molino-Soldier
JES-04-777	JES-04-777	32.3118	-110.741	3.57502e+06	524374			3574827	524435	2004-04-19	Lower Mt. Lemmon Hwy	JES-04-777	247	9	ml, Mineral lineation, plunging			Molino-Soldier
JES-04-778	JES-04-778	32.3107	-110.741	3.5749e+06	524348			3574705	524409	2004-04-19	Lower Mt. Lemmon Hwy	JES-04-778	258	10	ml, Mineral lineation, plunging			Molino-Soldier
JES-04-779	JES-04-779	32.3088	-110.742	3.5747e+06	524289			3574502	524350	2004-04-19	Lower Mt. Lemmon Hwy	JES-04-779	123	18	myg, Mylonitic foliation, generic			Molino-Soldier
JES-04-779	JES-04-779	32.3088	-110.742	3.5747e+06	524289			3574502	524350	2004-04-19	Lower Mt. Lemmon Hwy	JES-04-779	244	15	lt, Lineation, generic tectonic			Molino-Soldier
JES-04-780	JES-04-780	32.3084	-110.741	3.57465e+06	524335			3574453	524396	2004-04-19	Lower Mt. Lemmon Hwy	JES-04-780	107	23	myg, Mylonitic foliation, generic			Molino-Soldier
JES-04-780	JES-04-780	32.3084	-110.741	3.57465e+06	524335			3574453	524396	2004-04-19	Lower Mt. Lemmon Hwy	JES-04-780	245	12	lt, Lineation, generic tectonic			Molino-Soldier
JES-04-781	JES-04-781	32.3083	-110.741	3.57463e+06	524352			3574437	524413	2004-04-19	Lower Mt. Lemmon Hwy	JES-04-781	96	26	myg, Mylonitic foliation, generic			Molino-Soldier
JES-04-781	JES-04-781	32.3083	-110.741	3.57463e+06	524352			3574437	524413	2004-04-19	Lower Mt. Lemmon Hwy	JES-04-781	248	15	lt, Lineation, generic tectonic			Molino-Soldier
JES-04-782	JES-04-782	32.3055	-110.744	3.57433e+06	524058			3574136	524119	2004-04-19	Lower Mt. Lemmon Hwy	JES-04-782	114	22	myg, Mylonitic foliation, generic			Molino-Soldier
JES-04-782	JES-04-782	32.3055	-110.744	3.57433e+06	524058			3574136	524119	2004-04-19	Lower Mt. Lemmon Hwy	JES-04-782	250	18	sld, stretching lineation, directed down-plunge		SW	Molino-Soldier
JES-04-783	JES-04-783	32.3061	-110.744	3.57439e+06	524072			3574193	524133	2004-04-19	Lower Mt. Lemmon Hwy	JES-04-783	246	17	ml, Mineral lineation, plunging			Molino-Soldier
JES-04-784	JES-04-784	32.3062	-110.744	3.5744e+06	524076			3574207	524137	2004-04-19	Lower Mt. Lemmon Hwy	JES-04-784	97	26	myg, Mylonitic foliation, generic			Molino-Soldier
JES-04-784	JES-04-784	32.3062	-110.744	3.5744e+06	524076			3574207	524137	2004-04-19	Lower Mt. Lemmon Hwy	JES-04-784	247	12	lt, Lineation, generic tectonic			Molino-Soldier
JES-04-785	JES-04-785	32.3076	-110.744	3.57456e+06	524081			3574360	524142	2004-04-19	Lower Mt. Lemmon Hwy	JES-04-785	90	22	myg, Mylonitic foliation, generic			Molino-Soldier
JES-04-785	JES-04-785	32.3076	-110.744	3.57456e+06	524081			3574360	524142	2004-04-19	Lower Mt. Lemmon Hwy	JES-04-785	245	11	lt, Lineation, generic tectonic			Molino-Soldier
JES-04-786	JES-04-786	32.3095	-110.72	3.57477e+06	526334			3574576	526395	2004-04-23	Babad Do'ag - Hwy NE	JES-04-786	93	10	myg, Mylonitic foliation, generic			Molino-Soldier
JES-04-786	JES-04-786	32.3095	-110.72	3.57477e+06	526334			3574576	526395	2004-04-23	Babad Do'ag - Hwy NE	JES-04-786	246	9	lt, Lineation, generic tectonic			Molino-Soldier
JES-04-787	JES-04-787	32.3107	-110.721	3.57491e+06	526293			3574709	526354	2004-04-23	Babad Do'ag - Hwy NE	JES-04-787	125	13	myg, Mylonitic foliation, generic			Molino-Soldier
JES-04-787	JES-04-787	32.3107	-110.721	3.57491e+06	526293			3574709	526354	2004-04-23	Babad Do'ag - Hwy NE	JES-04-787	245	22	sld, stretching lineation, directed down-plunge		SW	Molino-Soldier
JES-04-790	JES-04-790	32.3117	-110.721	3.57502e+06	526276			3574825	526337	2004-04-23	Babad Do'ag - Hwy NE	JES-04-790	104	13	myg, Mylonitic foliation, generic			Molino-Soldier
JES-04-790	JES-04-790	32.3117	-110.721	3.57502e+06	526276			3574825	526337	2004-04-23	Babad Do'ag - Hwy NE	JES-04-790	247	8	lt, Lineation, generic tectonic			Molino-Soldier
JES-04-791	JES-04-791	32.3111	-110.722	3.57495e+06	526154			3574757	526215	2004-04-23	Babad Do'ag - Hwy NE	JES-04-791	250	14	ml, Mineral lineation, plunging			Molino-Soldier
JES-04-792	JES-04-792	32.3109	-110.722	3.57493e+06	526142			3574736	526203	2004-04-23	Babad Do'ag - Hwy NE	JES-04-792	243	18	ml, Mineral lineation, plunging			Molino-Soldier
JES-04-793	JES-04-793	32.3107	-110.723	3.57491e+06	526109			3574712	526170	2004-04-23	Babad Do'ag - Hwy NE	JES-04-793	243	13	ml, Mineral lineation, plunging			Molino-Soldier
JES-04-794	JES-04-794	32.3106	-110.724	3.5749e+06	526000			3574701	526061	2004-04-23	Babad Do'ag - Hwy NE	JES-04-794	245	10	ml, Mineral lineation, plunging			Molino-Soldier
JES-04-795	JES-04-795	32.3107	-110.724	3.57491e+06	525986			3574713	526047	2004-04-23	Babad Do'ag - Hwy NE	JES-04-795	241	12	ml, Mineral lineation, plunging	med-T		Molino-Soldier
JES-04-796	JES-04-796	32.3109	-110.724	3.57493e+06	525965			3574735	526026	2004-04-23	Babad Do'ag - Hwy NE	JES-04-796	247	18	ml, Mineral lineation, plunging	low-T (almost hot slickensides)		Molino-Soldier
JES-04-797	JES-04-797	32.3108	-110.725	3.57492e+06	525864			3574724	525925	2004-04-23	Babad Do'ag - Hwy NE	JES-04-797	84	23	myg, Mylonitic foliation, generic			Molino-Soldier
JES-04-797	JES-04-797	32.3108	-110.725	3.57492e+06	525864			3574724	525925	2004-04-23	Babad Do'ag - Hwy NE	JES-04-797	247	11	sld, stretching lineation, directed down-plunge		SW	Molino-Soldier
JES-04-798	JES-04-798	32.3094	-110.727	3.57476e+06	525732			3574567	525793	2004-04-23	Babad Do'ag - Hwy NE	JES-04-798	243	13	ml, Mineral lineation, plunging			Molino-Soldier
JES-04-801	JES-04-801	32.3094	-110.727	3.57477e+06	525719			3574569	525780	2004-04-23	Babad Do'ag - Hwy NE	JES-04-801	240	7	ml, Mineral lineation, plunging			Molino-Soldier
JES-04-803	JES-04-803	32.3093	-110.719	3.57476e+06	526492			3574561	526553	2004-04-23	Babad Do'ag - Hwy NE	JES-04-803	245	2	ml, Mineral lineation, plunging		SW	Molino-Soldier
JES-04-804	JES-04-804	32.3101	-110.718	3.57484e+06	526566			3574646	526627	2004-04-23	Babad Do'ag - Hwy NE	JES-04-804	245	5	ml, Mineral lineation, plunging			Molino-Soldier
JES-04-805	JES-04-805	32.3113	-110.715	3.57497e+06	526860			3574776	526921	2004-04-23	Babad Do'ag - Hwy NE	JES-04-805	250	10	ml, Mineral lineation, plunging			Molino-Soldier
JES-04-806	JES-04-806	32.3112	-110.714	3.57497e+06	526913			3574774	526974	2004-04-23	Babad Do'ag - Hwy NE	JES-04-806	246	1	ml, Mineral lineation, plunging			Molino-Soldier
JES-04-807	JES-04-807	32.3113	-110.714	3.57498e+06	526947			3574779	527008	2004-04-23	Babad Do'ag - Hwy NE	JES-04-807	247	10	ml, Mineral lineation, plunging			Molino-Soldier
JES-04-809	JES-04-809	32.3121	-110.712	3.57507e+06	527101			3574874	527162	2004-04-23	Babad Do'ag - Hwy NE	JES-04-809	116	11	myg, Mylonitic foliation, generic			Molino-Soldier
JES-04-809	JES-04-809	32.3121	-110.712	3.57507e+06	527101			3574874	527162	2004-04-23	Babad Do'ag - Hwy NE	JES-04-809	250	2	sld, stretching lineation, directed down-plunge	Top-SW shear sense. lineation trend was measured at station 297 (JES-04-808)	SW	Molino-Soldier
JES-04-810	JES-04-810	32.3153	-110.711	3.57543e+06	527172			3575229	527233	2004-04-23	Babad Do'ag - Hwy NE	JES-04-810	241	0	lth, lineation, horizontal			Molino-Soldier
JES-04-811	JES-04-811	32.3158	-110.711	3.57548e+06	527177			3575279	527238	2004-04-23	Babad Do'ag - Hwy NE	JES-04-811	246	12	ml, Mineral lineation, plunging	Top-SW shear sense from road cut 20 m to northeast (not plotted as foliation not measured)	SW	Molino-Soldier
JES-04-812	JES-04-812	32.3157	-110.711	3.57547e+06	527219			3575271	527280	2004-04-23	Babad Do'ag - Hwy NE	JES-04-812	96	12	myg, Mylonitic foliation, generic			Molino-Soldier
JES-04-812	JES-04-812	32.3157	-110.711	3.57547e+06	527219			3575271	527280	2004-04-23	Babad Do'ag - Hwy NE	JES-04-812	246	8	sld, stretching lineation, directed down-plunge		SW	Molino-Soldier
JES-04-813	JES-04-813	32.3164	-110.71	3.57555e+06	527278			3575352	527339	2004-04-23	Babad Do'ag - Hwy NE	JES-04-813	242	7	ml, Mineral lineation, plunging			Molino-Soldier
JES-04-814	JES-04-814	32.3172	-110.709	3.57563e+06	527361			3575435	527422	2004-04-23	Babad Do'ag - Hwy NE	JES-04-814	61	8	ml, Mineral lineation, plunging			Molino-Soldier
JES-04-816	JES-04-816	32.3201	-110.709	3.57596e+06	527435			3575761	527496	2004-04-23	Babad Do'ag - Hwy NE	JES-04-816	54	4	ml, Mineral lineation, plunging			Molino-Soldier
JES-04-817	JES-04-817	32.3203	-110.708	3.57598e+06	527445			3575778	527506	2004-04-23	Babad Do'ag - Hwy NE	JES-04-817	52	1	ml, Mineral lineation, plunging			Molino-Soldier
JES-04-818	JES-04-818	32.3209	-110.708	3.57605e+06	527467			3575851	527528	2004-04-23	Babad Do'ag - Hwy NE	JES-04-818	63	2	ml, Mineral lineation, plunging			Molino-Soldier
JES-04-819	JES-04-819	32.3214	-110.708	3.5761e+06	527509			3575902	527570	2004-04-23	Babad Do'ag - Hwy NE	JES-04-819	240	3	ml, Mineral lineation, plunging			Molino-Soldier
JES-04-821	JES-04-821	32.3228	-110.707	3.57625e+06	527624			3576053	527685	2004-04-23	Babad Do'ag - Hwy NE	JES-04-821	83	7	myg, Mylonitic foliation, generic			Molino-Soldier
JES-04-821	JES-04-821	32.3228	-110.707	3.57625e+06	527624			3576053	527685	2004-04-23	Babad Do'ag - Hwy NE	JES-04-821	57	5	sld, stretching lineation, directed down-plunge		NE	Molino-Soldier
JES-04-822	JES-04-822	32.3231	-110.706	3.57629e+06	527630			3576088	527691	2004-04-23	Babad Do'ag - Hwy NE	JES-04-822	59	13	ml, Mineral lineation, plunging			Molino-Soldier
JES-04-823	JES-04-823	32.3241	-110.706	3.5764e+06	527645			3576204	527706	2004-04-23	Babad Do'ag - Hwy NE	JES-04-823	59	16	ml, Mineral lineation, plunging			Molino-Soldier
JES-04-824	JES-04-824	32.3242	-110.706	3.57641e+06	527643			3576209	527704	2004-04-23	Babad Do'ag - Hwy NE	JES-04-824	66	17	ml, Mineral lineation, plunging	low-T (almost hot slickensides)		Molino-Soldier
JES-04-825	JES-04-825	32.3254	-110.705	3.57654e+06	527780			3576344	527841	2004-04-23	Babad Do'ag - Hwy NE	JES-04-825	63	5	ml, Mineral lineation, plunging			Molino-Soldier
JES-04-826	JES-04-826	32.3258	-110.704	3.57658e+06	527813			3576385	527874	2004-04-23	Babad Do'ag - Hwy NE	JES-04-826	130	22	myg, Mylonitic foliation, generic			Molino-Soldier
JES-04-826	JES-04-826	32.3258	-110.704	3.57658e+06	527813			3576385	527874	2004-04-23	Babad Do'ag - Hwy NE	JES-04-826	62	20	sld, stretching lineation, directed down-plunge		NE	Molino-Soldier
JES-04-829	JES-04-829	32.3251	-110.703	3.57651e+06	527912			3576309	527973	2004-04-28	Molino Canyon - middle	JES-04-829	335	15	myg, Mylonitic foliation, generic			Molino-Soldier
JES-04-829	JES-04-829	32.3251	-110.703	3.57651e+06	527912			3576309	527973	2004-04-28	Molino Canyon - middle	JES-04-829	55	13	sld, stretching lineation, directed down-plunge		NE	Molino-Soldier
JES-04-830	JES-04-830	32.3247	-110.704	3.57647e+06	527891			3576272	527952	2004-04-28	Molino Canyon - middle	JES-04-830	62	6	ml, Mineral lineation, plunging			Molino-Soldier
JES-04-831	JES-04-831	32.3243	-110.705	3.57642e+06	527783			3576222	527844	2004-04-28	Molino Canyon - middle	JES-04-831	58	11	ml, Mineral lineation, plunging			Molino-Soldier
JES-04-832	JES-04-832	32.3241	-110.705	3.5764e+06	527758			3576203	527819	2004-04-28	Molino Canyon - middle	JES-04-832	65	9	ml, Mineral lineation, plunging			Molino-Soldier
JES-04-833	JES-04-833	32.3241	-110.705	3.5764e+06	527748			3576199	527809	2004-04-28	Molino Canyon - middle	JES-04-833	355	11	myg, Mylonitic foliation, generic			Molino-Soldier
JES-04-833	JES-04-833	32.3241	-110.705	3.5764e+06	527748			3576199	527809	2004-04-28	Molino Canyon - middle	JES-04-833	53	10	sld, stretching lineation, directed down-plunge		NE	Molino-Soldier
JES-04-834	JES-04-834	32.3225	-110.706	3.57622e+06	527712			3576024	527773	2004-04-28	Molino Canyon - middle	JES-04-834	242	6	ml, Mineral lineation, plunging			Molino-Soldier
JES-04-835	JES-04-835	32.322	-110.706	3.57617e+06	527674			3575969	527735	2004-04-28	Molino Canyon - middle	JES-04-835	345	11	myg, Mylonitic foliation, generic			Molino-Soldier
JES-04-835	JES-04-835	32.322	-110.706	3.57617e+06	527674			3575969	527735	2004-04-28	Molino Canyon - middle	JES-04-835	56	11	sld, stretching lineation, directed down-plunge		NE	Molino-Soldier
JES-04-836	JES-04-836	32.3211	-110.707	3.57606e+06	527578			3575866	527639	2004-04-28	Molino Canyon - middle	JES-04-836	63	2	ml, Mineral lineation, plunging			Molino-Soldier
JES-04-837	JES-04-837	32.3202	-110.707	3.57597e+06	527566			3575774	527627	2004-04-28	Molino Canyon - middle	JES-04-837	65	9	ml, Mineral lineation, plunging			Molino-Soldier
JES-04-838	JES-04-838	32.3197	-110.707	3.57591e+06	527552			3575717	527613	2004-04-28	Molino Canyon - middle	JES-04-838	53	10	ml, Mineral lineation, plunging			Molino-Soldier
JES-04-839	JES-04-839	32.3176	-110.708	3.57568e+06	527443			3575479	527504	2004-04-28	Molino Canyon - middle	JES-04-839	54	6	ml, Mineral lineation, plunging			Molino-Soldier
JES-04-840	JES-04-840	32.3167	-110.708	3.57558e+06	527528			3575386	527589	2004-04-28	Molino Canyon - middle	JES-04-840	251	14	ml, Mineral lineation, plunging			Molino-Soldier
JES-04-841	JES-04-841	32.3162	-110.708	3.57552e+06	527533			3575324	527594	2004-04-28	Molino Canyon - middle	JES-04-841	239	6	ml, Mineral lineation, plunging			Molino-Soldier
JES-04-842	JES-04-842	32.3281	-110.699	3.57684e+06	528315			3576644	528376	2004-04-28	Molino Canyon - middle	JES-04-842	280	28	myg, Mylonitic foliation, generic			Molino-Soldier
JES-04-842	JES-04-842	32.3281	-110.699	3.57684e+06	528315			3576644	528376	2004-04-28	Molino Canyon - middle	JES-04-842	64	12	sld, stretching lineation, directed down-plunge		NE	Molino-Soldier
JES-04-843	JES-04-843	32.329	-110.697	3.57694e+06	528483			3576744	528544	2004-04-28	Molino Canyon - middle	JES-04-843	340	18	myg, Mylonitic foliation, generic			Molino-Soldier
JES-04-843	JES-04-843	32.329	-110.697	3.57694e+06	528483			3576744	528544	2004-04-28	Molino Canyon - middle	JES-04-843	63	10	sld, stretching lineation, directed down-plunge		NE	Molino-Soldier
JES-04-844	JES-04-844	32.33	-110.696	3.57706e+06	528637			3576863	528698	2004-04-28	Molino Canyon - middle	JES-04-844	308	20	myg, Mylonitic foliation, generic			Molino-Soldier
JES-04-845	JES-04-845	32.3329	-110.695	3.57737e+06	528725			3577175	528786	2004-04-28	Molino Canyon - middle	JES-04-845	45	20	ml, Mineral lineation, plunging			Molino-Soldier
JES-04-846	JES-04-846	32.3332	-110.695	3.57741e+06	528712			3577212	528773	2004-04-28	Molino Canyon - middle	JES-04-846	47	23	ml, Mineral lineation, plunging			Molino-Soldier
JES-04-847	JES-04-847	32.3359	-110.692	3.57771e+06	528966			3577508	529027	2004-04-28	Molino Canyon - middle	JES-04-847	274	30	myg, Mylonitic foliation, generic			Molino-Soldier
JES-04-848	JES-04-848	32.3367	-110.691	3.5778e+06	529039			3577600	529100	2004-04-28	Molino Canyon - middle	JES-04-848	281	21	myg, Mylonitic foliation, generic			Molino-Soldier
JES-04-848	JES-04-848	32.3367	-110.691	3.5778e+06	529039			3577600	529100	2004-04-28	Molino Canyon - middle	JES-04-848	41	15	lt, Lineation, generic tectonic			Molino-Soldier
JES-05-001	JES-05-001	32.3352	-110.721	3.57763e+06	526287		12N	3577429	526348	2004-10-20	Prison Camp E	JES-05-001	260	36	Composite foliation gneissic mylonitic foliation Description				2124
JES-05-001	JES-05-001	32.3352	-110.721	3.57763e+06	526287		12N	3577429	526348	2004-10-20	Prison Camp E	JES-05-001	45	27	lineation mylonitic stretch shape directed Description		NE		4037
JES-05-002	JES-05-002	32.3348	-110.721	3.57758e+06	526299		12N	3577380	526360	2004-10-20	Prison Camp E	JES-05-002	316	14	Composite foliation gneissic mylonitic foliation Description				2124
JES-05-002	JES-05-002	32.3348	-110.721	3.57758e+06	526299		12N	3577380	526360	2004-10-20	Prison Camp E	JES-05-002	54	10	lineation stretch shape mylonitic Description				2149
JES-05-003	JES-05-003	32.3347	-110.72	3.57757e+06	526307		12N	3577377	526368	2004-10-20	Prison Camp E	JES-05-003	48	18	lineation stretch shape mylonitic Description				2161
JES-05-004	JES-05-004	32.3348	-110.72	3.57758e+06	526323		12N	3577386	526384	2004-10-20	Prison Camp E	JES-05-004	53	8	lineation stretch shape mylonitic Description				2161
JES-05-005	JES-05-005	32.3344	-110.72	3.57754e+06	526352		12N	3577341	526413	2004-10-20	Prison Camp E	JES-05-005	338	14	Composite foliation gneissic mylonitic foliation Description				2124
JES-05-005	JES-05-005	32.3344	-110.72	3.57754e+06	526352		12N	3577341	526413	2004-10-20	Prison Camp E	JES-05-005	54	11	lineation mylonitic stretch shape directed Description		NE		4037
JES-05-006	JES-05-006	32.3344	-110.72	3.57754e+06	526358		12N	3577339	526419	2004-10-20	Prison Camp E	JES-05-006	51	13	lineation stretch shape mylonitic Description				2161
JES-05-008	JES-05-008	32.334	-110.718	3.5775e+06	526521		12N	3577298	526582	2004-10-20	Prison Camp E	JES-05-008	49	10	lineation stretch shape mylonitic Description				2161
JES-05-009	JES-05-009	32.3341	-110.718	3.57751e+06	526578		12N	3577310	526639	2004-10-20	Prison Camp E	JES-05-009	51	4	lineation stretch shape mylonitic Description				2161
JES-05-011	JES-05-011	32.334	-110.716	3.57749e+06	526710		12N	3577296	526771	2004-10-20	Prison Camp E	JES-05-011	52	8	lineation stretch shape mylonitic Description				2161
JES-05-012	JES-05-012	32.3348	-110.716	3.57758e+06	526752		12N	3577380	526813	2004-10-20	Prison Camp E	JES-05-012	48	15	lineation stretch shape mylonitic Description				2161
JES-05-013	JES-05-013	32.3352	-110.716	3.57763e+06	526753		12N	3577435	526814	2004-10-20	Prison Camp E	JES-05-013	52	24	lineation stretch shape mylonitic Description				2161
JES-05-014	JES-05-014	32.3356	-110.716	3.57767e+06	526765		12N	3577476	526826	2004-10-20	Prison Camp E	JES-05-014	52	21	lineation stretch shape mylonitic Description				2161
JES-05-015	JES-05-015	32.3378	-110.711	3.57792e+06	527168		12N	3577722	527229	2004-10-20	Prison Camp E	JES-05-015	43	7	lineation stretch shape mylonitic Description				2161
JES-05-016	JES-05-016	32.338	-110.714	3.57794e+06	526955		12N	3577742	527016	2004-10-20	Prison Camp E	JES-05-016	0	12	Composite foliation gneissic mylonitic foliation Description				2124
JES-05-016	JES-05-016	32.338	-110.714	3.57794e+06	526955		12N	3577742	527016	2004-10-20	Prison Camp E	JES-05-016	41	10	lineation stretch shape mylonitic Description				2161
JES-05-017	JES-05-017	32.338	-110.715	3.57794e+06	526818		12N	3577744	526879	2004-10-20	Prison Camp E	JES-05-017	42	6	lineation stretch shape mylonitic Description				2161
JES-05-018	JES-05-018	32.3382	-110.716	3.57796e+06	526745		12N	3577763	526806	2004-10-20	Prison Camp E	JES-05-018	355	14	Composite foliation gneissic mylonitic foliation Description				2124
JES-05-018	JES-05-018	32.3382	-110.716	3.57796e+06	526745		12N	3577763	526806	2004-10-20	Prison Camp E	JES-05-018	42	12	lineation stretch shape mylonitic Description				2149
JES-05-019	JES-05-019	32.3345	-110.723	3.57755e+06	526042		12N	3577350	526103	2004-10-22	Prison Camp S 22 Oct	JES-05-019	333	14	Composite foliation gneissic mylonitic foliation Description				2124
JES-05-019	JES-05-019	32.3345	-110.723	3.57755e+06	526042		12N	3577350	526103	2004-10-22	Prison Camp S 22 Oct	JES-05-019	53	14	lineation stretch shape mylonitic Description				2149
JES-05-020	JES-05-020	32.3338	-110.724	3.57747e+06	525986		12N	3577276	526047	2004-10-22	Prison Camp S 22 Oct	JES-05-020	357	12	Composite foliation gneissic mylonitic foliation Description				2124
JES-05-020	JES-05-020	32.3338	-110.724	3.57747e+06	525986		12N	3577276	526047	2004-10-22	Prison Camp S 22 Oct	JES-05-020	58	11	lineation mylonitic stretch shape directed Description		NE		4037
JES-05-023	JES-05-023	32.333	-110.724	3.57738e+06	525993		12N	3577183	526054	2004-10-22	Prison Camp S 22 Oct	JES-05-023	59	9	lineation stretch shape mylonitic Description		NE		2161
JES-05-024	JES-05-024	32.333	-110.723	3.57739e+06	526043		12N	3577188	526104	2004-10-22	Prison Camp S 22 Oct	JES-05-024	56	10	lineation stretch shape mylonitic Description				2161
JES-05-025	JES-05-025	32.3328	-110.722	3.57736e+06	526140		12N	3577167	526201	2004-10-22	Prison Camp S 22 Oct	JES-05-025	270	8	Composite foliation gneissic mylonitic foliation Description				2124
JES-05-025	JES-05-025	32.3328	-110.722	3.57736e+06	526140		12N	3577167	526201	2004-10-22	Prison Camp S 22 Oct	JES-05-025	55	7	lineation stretch shape mylonitic Description				2149
JES-05-026	JES-05-026	32.3337	-110.722	3.57746e+06	526174		12N	3577261	526235	2004-10-22	Prison Camp S 22 Oct	JES-05-026	57	8	lineation stretch shape mylonitic Description				2161
JES-05-027	JES-05-027	32.3338	-110.721	3.57747e+06	526274		12N	3577276	526335	2004-10-22	Prison Camp S 22 Oct	JES-05-027	51	10	lineation stretch shape mylonitic Description				2161
JES-05-028	JES-05-028	32.333	-110.72	3.57739e+06	526368		12N	3577188	526429	2004-10-22	Prison Camp S 22 Oct	JES-05-028	55	9	lineation stretch shape mylonitic Description		SW		2161
JES-05-030	JES-05-030	32.3321	-110.719	3.57728e+06	526444		12N	3577086	526505	2004-10-22	Prison Camp S 22 Oct	JES-05-030	55	5	lineation stretch shape mylonitic Description				2161
JES-05-031	JES-05-031	32.3324	-110.718	3.57732e+06	526497		12N	3577121	526558	2004-10-22	Prison Camp S 22 Oct	JES-05-031	65	6	lineation stretch shape mylonitic Description		NE		4035
JES-05-032	JES-05-032	32.3322	-110.718	3.57729e+06	526502		12N	3577093	526563	2004-10-22	Prison Camp S 22 Oct	JES-05-032	295	6	Composite foliation gneissic mylonitic foliation Description				2124
JES-05-032	JES-05-032	32.3322	-110.718	3.57729e+06	526502		12N	3577093	526563	2004-10-22	Prison Camp S 22 Oct	JES-05-032	51	5	lineation mylonitic stretch shape directed Description		NE		4037
JES-05-033	JES-05-033	32.331	-110.718	3.57716e+06	526519		12N	3576959	526580	2004-10-22	Prison Camp S 22 Oct	JES-05-033	59	0	lineation stretch shape mylonitic Description		NE		2161
JES-05-034	JES-05-034	32.3307	-110.716	3.57713e+06	526716		12N	3576930	526777	2004-10-22	Prison Camp S 22 Oct	JES-05-034	62	0	lineation stretch shape mylonitic Description				2161
JES-05-035	JES-05-035	32.3296	-110.716	3.57701e+06	526739		12N	3576810	526800	2004-10-22	Prison Camp S 22 Oct	JES-05-035	64	3	lineation stretch shape mylonitic Description				2161
JES-05-036	JES-05-036	32.3279	-110.716	3.57681e+06	526733		12N	3576617	526794	2004-10-22	Prison Camp S 22 Oct	JES-05-036	241	1	lineation mylonitic stretch shape directed Description				4042
JES-05-036	JES-05-036	32.3279	-110.716	3.57681e+06	526733		12N	3576617	526794	2004-10-22	Prison Camp S 22 Oct	JES-05-036	47	13	Composite foliation gneissic mylonitic foliation Description		SW		2124
JES-05-037	JES-05-037	32.3277	-110.717	3.57679e+06	526621		12N	3576594	526682	2004-10-22	Prison Camp S 22 Oct	JES-05-037	65	3	lineation stretch shape mylonitic Description				2161
JES-05-038	JES-05-038	32.328	-110.718	3.57683e+06	526571		12N	3576633	526632	2004-10-22	Prison Camp S 22 Oct	JES-05-038	65	1	lineation stretch shape mylonitic Description				2161
JES-05-039	JES-05-039	32.3299	-110.719	3.57704e+06	526435		12N	3576838	526496	2004-10-22	Prison Camp S 22 Oct	JES-05-039	56	3	lineation stretch shape mylonitic Description				2161
JES-05-040	JES-05-040	32.3304	-110.72	3.5771e+06	526356		12N	3576899	526417	2004-10-22	Prison Camp S 22 Oct	JES-05-040	58	5	lineation stretch shape mylonitic Description				2161
JES-05-041	JES-05-041	32.3305	-110.72	3.5771e+06	526324		12N	3576905	526385	2004-10-22	Prison Camp S 22 Oct	JES-05-041	60	7	lineation stretch shape mylonitic Description				2161
JES-05-042	JES-05-042	32.3326	-110.723	3.57734e+06	526080		12N	3577139	526141	2004-10-22	Prison Camp S 22 Oct	JES-05-042	57	10	lineation stretch shape mylonitic Description				2161
JES-05-043	JES-05-043	32.3349	-110.723	3.57759e+06	526084		12N	3577392	526145	2004-10-22	Prison Camp S 22 Oct	JES-05-043	55	12	lineation stretch shape mylonitic Description				2161
JES-05-044	JES-05-044	32.3361	-110.72	3.57772e+06	526397		12N	3577526	526458	2004-11-05	Prison Camp SE (5 Nov)	JES-05-044	54	5	lineation stretch shape mylonitic Description				2161
JES-05-045	JES-05-045	32.335	-110.718	3.57761e+06	526559		12N	3577408	526620	2004-11-05	Prison Camp SE (5 Nov)	JES-05-045	55	10	lineation stretch shape mylonitic Description				2161
JES-05-046	JES-05-046	32.3337	-110.718	3.57746e+06	526534		12N	3577259	526595	2004-11-05	Prison Camp SE (5 Nov)	JES-05-046	55	9	lineation stretch shape mylonitic Description				2161
JES-05-047	JES-05-047	32.3335	-110.718	3.57744e+06	526552		12N	3577240	526613	2004-11-05	Prison Camp SE (5 Nov)	JES-05-047	57	12	lineation stretch shape mylonitic Description				2161
JES-05-048	JES-05-048	32.3333	-110.718	3.57741e+06	526556		12N	3577215	526617	2004-11-05	Prison Camp SE (5 Nov)	JES-05-048	53	3	lineation stretch shape mylonitic Description				2161
JES-05-049	JES-05-049	32.3332	-110.717	3.5774e+06	526596		12N	3577205	526657	2004-11-05	Prison Camp SE (5 Nov)	JES-05-049	53	5	lineation stretch shape mylonitic Description				2161
JES-05-050	JES-05-050	32.3331	-110.717	3.5774e+06	526637		12N	3577201	526698	2004-11-05	Prison Camp SE (5 Nov)	JES-05-050	54	4	lineation stretch shape mylonitic Description				2161
JES-05-051	JES-05-051	32.3333	-110.716	3.57741e+06	526689		12N	3577217	526750	2004-11-05	Prison Camp SE (5 Nov)	JES-05-051	50	2	lineation stretch shape mylonitic Description				2161
JES-05-052	JES-05-052	32.3333	-110.716	3.57741e+06	526750		12N	3577217	526811	2004-11-05	Prison Camp SE (5 Nov)	JES-05-052	53	3	lineation stretch shape mylonitic Description				2161
JES-05-053	JES-05-053	32.3332	-110.715	3.5774e+06	526840		12N	3577205	526901	2004-11-05	Prison Camp SE (5 Nov)	JES-05-053	52	3	lineation stretch shape mylonitic Description				2161
JES-05-054	JES-05-054	32.3331	-110.714	3.57739e+06	526945		12N	3577197	527006	2004-11-05	Prison Camp SE (5 Nov)	JES-05-054	52	1	lineation stretch shape mylonitic Description				2161
JES-05-055	JES-05-055	32.3325	-110.713	3.57733e+06	526988		12N	3577135	527049	2004-11-05	Prison Camp SE (5 Nov)	JES-05-055	53	3	lineation stretch shape mylonitic Description				2161
JES-05-056	JES-05-056	32.3321	-110.713	3.57729e+06	526994		12N	3577088	527055	2004-11-05	Prison Camp SE (5 Nov)	JES-05-056	57	6	lineation mylonitic stretch shape directed Description		NE		4035
JES-05-057	JES-05-057	32.3312	-110.713	3.57718e+06	526969		12N	3576985	527030	2004-11-05	Prison Camp SE (5 Nov)	JES-05-057	243	7	lineation stretch shape mylonitic Description				2161
JES-05-058	JES-05-058	32.3313	-110.715	3.57719e+06	526860		12N	3576997	526921	2004-11-05	Prison Camp SE (5 Nov)	JES-05-058	55	9	lineation stretch shape mylonitic Description				2161
JES-05-059	JES-05-059	32.3303	-110.715	3.57708e+06	526817		12N	3576885	526878	2004-11-05	Prison Camp SE (5 Nov)	JES-05-059	62	5	lineation stretch shape mylonitic Description				2161
JES-05-061	JES-05-061	32.3288	-110.715	3.57692e+06	526869		12N	3576718	526930	2004-11-05	Prison Camp SE (5 Nov)	JES-05-061	63	8	lineation stretch shape mylonitic Description				2161
JES-05-062	JES-05-062	32.3275	-110.714	3.57677e+06	526938		12N	3576573	526999	2004-11-05	Prison Camp SE (5 Nov)	JES-05-062	65	6	lineation stretch shape mylonitic Description				2161
JES-05-063	JES-05-063	32.3268	-110.717	3.5767e+06	526662		12N	3576500	526723	2004-11-05	Prison Camp SE (5 Nov)	JES-05-063	59	0	lineation stretch shape mylonitic Description				2161
JES-05-064	JES-05-064	32.3268	-110.717	3.5767e+06	526662		12N	3576500	526723	2004-11-05	Prison Camp SE (5 Nov)	JES-05-064	65	0	lineation stretch shape mylonitic Description				2161
JES-05-065	JES-05-065	32.3271	-110.717	3.57673e+06	526589		12N	3576530	526650	2004-11-05	Prison Camp SE (5 Nov)	JES-05-065	67	2	lineation stretch shape mylonitic Description				2161
JES-05-066	JES-05-066	32.3263	-110.718	3.57664e+06	526550		12N	3576440	526611	2004-11-05	Prison Camp SE (5 Nov)	JES-05-066	67	1	lineation stretch shape mylonitic Description				2161
JES-05-067	JES-05-067	32.3258	-110.718	3.57658e+06	526529		12N	3576383	526590	2004-11-05	Prison Camp SE (5 Nov)	JES-05-067	64	2	lineation stretch shape mylonitic Description				2161
JES-05-068	JES-05-068	32.3247	-110.718	3.57646e+06	526517		12N	3576262	526578	2004-11-05	Prison Camp SE (5 Nov)	JES-05-068	245	8	lineation stretch shape mylonitic Description				2161
JES-05-069	JES-05-069	32.3239	-110.718	3.57637e+06	526577		12N	3576172	526638	2004-11-05	Prison Camp SE (5 Nov)	JES-05-069	62	0	lineation stretch shape mylonitic Description				2161
JES-05-070	JES-05-070	32.3225	-110.719	3.57622e+06	526487		12N	3576018	526548	2004-11-05	Prison Camp SE (5 Nov)	JES-05-070	239	9	lineation stretch shape mylonitic Description				2161
JES-05-071	JES-05-071	32.3236	-110.721	3.57634e+06	526303		12N	3576147	526364	2004-11-05	Prison Camp SE (5 Nov)	JES-05-071	245	15	Composite foliation gneissic mylonitic foliation Description				2124
JES-05-071	JES-05-071	32.3236	-110.721	3.57634e+06	526303		12N	3576147	526364	2004-11-05	Prison Camp SE (5 Nov)	JES-05-071	60	4	lineation stretch shape mylonitic Description				2149
JES-05-072	JES-05-072	32.3247	-110.722	3.57646e+06	526173		12N	3576262	526234	2004-11-05	Prison Camp SE (5 Nov)	JES-05-072	65	4	lineation stretch shape mylonitic Description				2161
JES-05-073	JES-05-073	32.3249	-110.722	3.57649e+06	526144		12N	3576288	526205	2004-11-05	Prison Camp SE (5 Nov)	JES-05-073	265	27	Composite foliation gneissic mylonitic foliation Description				2124
JES-05-073	JES-05-073	32.3249	-110.722	3.57649e+06	526144		12N	3576288	526205	2004-11-05	Prison Camp SE (5 Nov)	JES-05-073	63	8	lineation stretch shape mylonitic Description				2149
JES-05-074	JES-05-074	32.3251	-110.723	3.57651e+06	526065		12N	3576308	526126	2004-11-05	Prison Camp SE (5 Nov)	JES-05-074	265	20	Composite foliation gneissic mylonitic foliation Description				2124
JES-05-074	JES-05-074	32.3251	-110.723	3.57651e+06	526065		12N	3576308	526126	2004-11-05	Prison Camp SE (5 Nov)	JES-05-074	68	4	lineation stretch shape mylonitic Description				2149
JES-05-075	JES-05-075	32.3258	-110.723	3.57658e+06	526041		12N	3576386	526102	2004-11-05	Prison Camp SE (5 Nov)	JES-05-075	66	5	lineation stretch shape mylonitic Description				2161
JES-05-076	JES-05-076	32.3267	-110.723	3.57669e+06	526070		12N	3576491	526131	2004-11-05	Prison Camp SE (5 Nov)	JES-05-076	65	1	lineation stretch shape mylonitic Description				2161
JES-05-077	JES-05-077	32.3291	-110.722	3.57695e+06	526140		12N	3576752	526201	2004-11-05	Prison Camp SE (5 Nov)	JES-05-077	56	7	lineation stretch shape mylonitic Description				2161
JES-05-078	JES-05-078	32.3325	-110.723	3.57733e+06	526099		12N	3577130	526160	2004-11-05	Prison Camp SE (5 Nov)	JES-05-078	59	12	lineation stretch shape mylonitic Description				2161
JES-05-079	JES-05-079	32.3349	-110.723	3.57759e+06	526084		12N	3577392	526145	2004-11-05	Prison Camp SE (5 Nov)	JES-05-079	55	12	lineation stretch shape mylonitic Description				2161
JES-05-080	JES-05-080	32.3085	-110.719	3.57467e+06	526434		12N	3574470	526495	2004-11-10	lower Molino Cyn	JES-05-080	244	8	lineation stretch shape mylonitic Description				2161
JES-05-081	JES-05-081	32.3082	-110.717	3.57463e+06	526667		12N	3574433	526728	2004-11-10	lower Molino Cyn	JES-05-081	95	14	Composite foliation gneissic mylonitic foliation Description				2124
JES-05-081	JES-05-081	32.3082	-110.717	3.57463e+06	526667		12N	3574433	526728	2004-11-10	lower Molino Cyn	JES-05-081	248	7	lineation stretch shape mylonitic Description				2149
JES-05-082	JES-05-082	32.3067	-110.717	3.57446e+06	526651		12N	3574266	526712	2004-11-10	lower Molino Cyn	JES-05-082	54	17	Composite foliation gneissic mylonitic foliation Description				2124
JES-05-082	JES-05-082	32.3067	-110.717	3.57446e+06	526651		12N	3574266	526712	2004-11-10	lower Molino Cyn	JES-05-082	67	1	lineation stretch shape mylonitic Description				2149
JES-05-083	JES-05-083	32.3068	-110.714	3.57447e+06	526941		12N	3574277	527002	2004-11-10	lower Molino Cyn	JES-05-083	243	1	lineation stretch shape mylonitic Description				2161
JES-05-084	JES-05-084	32.3067	-110.713	3.57447e+06	526999		12N	3574276	527060	2004-11-10	lower Molino Cyn	JES-05-084	243	8	lineation stretch shape mylonitic Description				2161
JES-05-085	JES-05-085	32.306	-110.714	3.57439e+06	526971		12N	3574197	527032	2004-11-10	lower Molino Cyn	JES-05-085	170	6	Composite foliation gneissic mylonitic foliation Description				2124
JES-05-085	JES-05-085	32.306	-110.714	3.57439e+06	526971		12N	3574197	527032	2004-11-10	lower Molino Cyn	JES-05-085	237	4	lineation mylonitic stretch shape directed Description		SW		4042
JES-05-086	JES-05-086	32.307	-110.713	3.5745e+06	527035		12N	3574303	527096	2004-11-10	lower Molino Cyn	JES-05-086	234	20	lineation stretch shape mylonitic Description				2149
JES-05-086	JES-05-086	32.307	-110.713	3.5745e+06	527035		12N	3574303	527096	2004-11-10	lower Molino Cyn	JES-05-086	102	11	Composite foliation gneissic mylonitic foliation Description				2124
JES-05-087	JES-05-087	32.3082	-110.712	3.57463e+06	527123		12N	3574437	527184	2004-11-10	lower Molino Cyn	JES-05-087	235	8	lineation stretch shape mylonitic Description				2161
JES-05-088	JES-05-088	32.3083	-110.711	3.57465e+06	527246		12N	3574450	527307	2004-11-10	lower Molino Cyn	JES-05-088	136	7	Composite foliation gneissic mylonitic foliation Description				2124
JES-05-088	JES-05-088	32.3083	-110.711	3.57465e+06	527246		12N	3574450	527307	2004-11-10	lower Molino Cyn	JES-05-088	244	7	lineation mylonitic stretch shape directed Description		SW		4042
JES-05-089	JES-05-089	32.3082	-110.711	3.57464e+06	527248		12N	3574439	527309	2004-11-10	lower Molino Cyn	JES-05-089	112	10	Composite foliation gneissic mylonitic foliation Description				2124
JES-05-089	JES-05-089	32.3082	-110.711	3.57464e+06	527248		12N	3574439	527309	2004-11-10	lower Molino Cyn	JES-05-089	243	2	lineation mylonitic stretch shape directed Description		SW		4042
JES-05-090	JES-05-090	32.3085	-110.71	3.57467e+06	527305		12N	3574476	527366	2004-11-10	lower Molino Cyn	JES-05-090	105	15	Composite foliation gneissic mylonitic foliation Description				2124
JES-05-090	JES-05-090	32.3085	-110.71	3.57467e+06	527305		12N	3574476	527366	2004-11-10	lower Molino Cyn	JES-05-090	245	5	lineation stretch shape mylonitic Description				2149
JES-05-091	JES-05-091	32.309	-110.709	3.57473e+06	527352		12N	3574530	527413	2004-11-10	lower Molino Cyn	JES-05-091	246	18	lineation stretch shape mylonitic Description				2161
JES-05-092	JES-05-092	32.3098	-110.71	3.57482e+06	527336		12N	3574620	527397	2004-11-10	lower Molino Cyn	JES-05-092	67	40	Composite foliation gneissic mylonitic foliation Description				2124
JES-05-092	JES-05-092	32.3098	-110.71	3.57482e+06	527336		12N	3574620	527397	2004-11-10	lower Molino Cyn	JES-05-092	67	0	lineation stretch shape mylonitic Description				2149
JES-05-094	JES-05-094	32.3108	-110.71	3.57493e+06	527345		12N	3574729	527406	2004-11-10	lower Molino Cyn	JES-05-094	98	15	Composite foliation gneissic mylonitic foliation Description				2124
JES-05-094	JES-05-094	32.3108	-110.71	3.57493e+06	527345		12N	3574729	527406	2004-11-10	lower Molino Cyn	JES-05-094	249	9	lineation stretch shape mylonitic Description				2149
JES-05-095	JES-05-095	32.3114	-110.71	3.57499e+06	527345		12N	3574792	527406	2004-11-10	lower Molino Cyn	JES-05-095	247	7	lineation stretch shape mylonitic Description
JES-05-096	JES-05-096	32.3121	-110.709	3.57507e+06	527394		12N	3574876	527455	2004-11-10	lower Molino Cyn	JES-05-096	116	18	Composite foliation gneissic mylonitic foliation Description				2124
JES-05-096	JES-05-096	32.3121	-110.709	3.57507e+06	527394		12N	3574876	527455	2004-11-10	lower Molino Cyn	JES-05-096	251	10	lineation stretch shape mylonitic Description		SW		4042
JES-05-097	JES-05-097	32.3121	-110.709	3.57507e+06	527392		12N	3574876	527453	2004-11-10	lower Molino Cyn	JES-05-097	245	6	lineation stretch shape mylonitic Description				2161
JES-05-098	JES-05-098	32.3127	-110.709	3.57513e+06	527394		12N	3574932	527455	2004-11-10	lower Molino Cyn	JES-05-098	79	17	Composite foliation gneissic mylonitic foliation Description				2124
JES-05-098	JES-05-098	32.3127	-110.709	3.57513e+06	527394		12N	3574932	527455	2004-11-10	lower Molino Cyn	JES-05-098	259	2	lineation stretch shape mylonitic Description				2149
JES-05-099	JES-05-099	32.3137	-110.709	3.57524e+06	527369		12N	3575045	527430	2004-11-10	lower Molino Cyn	JES-05-099	50	8	Composite foliation gneissic mylonitic foliation Description				2124
JES-05-099	JES-05-099	32.3137	-110.709	3.57524e+06	527369		12N	3575045	527430	2004-11-10	lower Molino Cyn	JES-05-099	71	3	lineation stretch shape mylonitic Description				2149
JES-05-100	JES-05-100	32.3138	-110.709	3.57526e+06	527384		12N	3575058	527445	2004-11-10	lower Molino Cyn	JES-05-100	20	9	Composite foliation gneissic mylonitic foliation Description				2124
JES-05-100	JES-05-100	32.3138	-110.709	3.57526e+06	527384		12N	3575058	527445	2004-11-10	lower Molino Cyn	JES-05-100	60	8	lineation mylonitic stretch shape directed Description		SW		4042
JES-05-102	JES-05-102	32.3149	-110.709	3.57538e+06	527396		12N	3575180	527457	2004-11-10	lower Molino Cyn	JES-05-102	75	10	Composite foliation gneissic mylonitic foliation Description				2124
JES-05-102	JES-05-102	32.3149	-110.709	3.57538e+06	527396		12N	3575180	527457	2004-11-10	lower Molino Cyn	JES-05-102	245	2	lineation mylonitic stretch shape directed Description		SW		2151
JES-05-103	JES-05-103	32.3163	-110.709	3.57553e+06	527384		12N	3575331	527445	2004-11-10	lower Molino Cyn	JES-05-103	248	6	lineation mylonitic stretch shape directed Description		SW		4042
JES-05-104	JES-05-104	32.3136	-110.712	3.57523e+06	527070		12N	3575035	527131	2004-11-10	lower Molino Cyn	JES-05-104	122	18	Composite foliation gneissic mylonitic foliation Description				2124
JES-05-104	JES-05-104	32.3136	-110.712	3.57523e+06	527070		12N	3575035	527131	2004-11-10	lower Molino Cyn	JES-05-104	255	9	lineation stretch shape mylonitic Description
JES-05-105	JES-05-105	32.3131	-110.714	3.57518e+06	526945		12N	3574984	527006	2004-11-10	lower Molino Cyn	JES-05-105	159	9	Composite foliation gneissic mylonitic foliation Description				2124
JES-05-105	JES-05-105	32.3131	-110.714	3.57518e+06	526945		12N	3574984	527006	2004-11-10	lower Molino Cyn	JES-05-105	254	9	lineation stretch shape mylonitic Description				2149
JES-05-106	JES-05-106	32.313	-110.715	3.57517e+06	526800		12N	3574974	526861	2004-11-10	lower Molino Cyn	JES-05-106	238	0	lineation stretch shape mylonitic Description
JES-05-107	JES-05-107	32.3132	-110.716	3.57519e+06	526731		12N	3574988	526792	2004-11-10	lower Molino Cyn	JES-05-107	83	17	Composite foliation gneissic mylonitic foliation Description				2124
JES-05-107	JES-05-107	32.3132	-110.716	3.57519e+06	526731		12N	3574988	526792	2004-11-10	lower Molino Cyn	JES-05-107	247	4	lineation stretch shape mylonitic Description				2149
JES-05-108	JES-05-108	32.3126	-110.718	3.57512e+06	526592		12N	3574922	526653	2004-11-10	lower Molino Cyn	JES-05-108	120	14	Composite foliation gneissic mylonitic foliation Description				2124
JES-05-108	JES-05-108	32.3126	-110.718	3.57512e+06	526592		12N	3574922	526653	2004-11-10	lower Molino Cyn	JES-05-108	248	10	lineation stretch shape mylonitic Description				2149
JES-05-109	JES-05-109	32.3113	-110.717	3.57498e+06	526669		12N	3574783	526730	2004-11-10	lower Molino Cyn	JES-05-109	125	14	Composite foliation gneissic mylonitic foliation Description				2124
JES-05-109	JES-05-109	32.3113	-110.717	3.57498e+06	526669		12N	3574783	526730	2004-11-10	lower Molino Cyn	JES-05-109	246	12	lineation stretch shape mylonitic Description				2149
JES-05-110	JES-05-110	32.31	-110.719	3.57484e+06	526468		12N	3574640	526529	2004-11-10	lower Molino Cyn	JES-05-110	243	9	lineation stretch shape mylonitic Description				2149
JES-05-111	JES-05-111	32.3322	-110.723	3.57729e+06	526024		12N	3577090	526085	2004-11-24	Middle Soldier Canyon	JES-05-111	313	19	Composite foliation gneissic mylonitic foliation Description				2124
JES-05-111	JES-05-111	32.3322	-110.723	3.57729e+06	526024		12N	3577090	526085	2004-11-24	Middle Soldier Canyon	JES-05-111	59	9	lineation mylonitic stretch shape directed Description		NE		4037
JES-05-113	JES-05-113	32.3324	-110.725	3.57732e+06	525878		12N	3577122	525939	2004-12-13	Middle Soldier Canyon	JES-05-113	294	10	Composite foliation gneissic mylonitic foliation Description				2124
JES-05-113	JES-05-113	32.3324	-110.725	3.57732e+06	525878		12N	3577122	525939	2004-12-13	Middle Soldier Canyon	JES-05-113	50	9	lineation stretch shape mylonitic Description		NE		2149
JES-05-114	JES-05-114	32.3318	-110.725	3.57724e+06	525875		12N	3577046	525936	2004-12-13	Middle Soldier Canyon	JES-05-114	59	11	lineation stretch shape mylonitic Description				2161
JES-05-115	JES-05-115	32.331	-110.725	3.57716e+06	525870		12N	3576964	525931	2004-12-13	Middle Soldier Canyon	JES-05-115	5	10	Composite foliation gneissic mylonitic foliation Description				2124
JES-05-115	JES-05-115	32.331	-110.725	3.57716e+06	525870		12N	3576964	525931	2004-12-13	Middle Soldier Canyon	JES-05-115	59	8	lineation stretch shape mylonitic Description				2149
JES-05-116	JES-05-116	32.3312	-110.728	3.57718e+06	525600		12N	3576982	525661	2004-12-13	Middle Soldier Canyon	JES-05-116	59	14	lineation stretch shape mylonitic Description		NE		2161
JES-05-117	JES-05-117	32.3306	-110.728	3.57711e+06	525638		12N	3576917	525699	2004-12-13	Middle Soldier Canyon	JES-05-117	61	9	lineation stretch shape mylonitic Description		NE		2161
JES-05-118	JES-05-118	32.3306	-110.727	3.57711e+06	525678		12N	3576914	525739	2004-12-13	Middle Soldier Canyon	JES-05-118	58	8	lineation stretch shape mylonitic Description				2161
JES-05-119	JES-05-119	32.3307	-110.727	3.57712e+06	525697		12N	3576926	525758	2004-12-13	Middle Soldier Canyon	JES-05-119	60	9	lineation mylonitic stretch shape directed Description		NE		4037
JES-05-121	JES-05-121	32.3316	-110.728	3.57722e+06	525580		12N	3577022	525641	2004-12-13	Middle Soldier Canyon	JES-05-121	65	14	lineation mylonitic stretch shape directed Description		NE		4037
JES-05-124	JES-05-124	32.3308	-110.729	3.57713e+06	525485		12N	3576937	525546	2004-12-13	Middle Soldier Canyon	JES-05-124	310	11	Composite foliation gneissic mylonitic foliation Description				2124
JES-05-124	JES-05-124	32.3308	-110.729	3.57713e+06	525485		12N	3576937	525546	2004-12-13	Middle Soldier Canyon	JES-05-124	65	10	lineation mylonitic stretch shape directed Description		NE		4037
JES-05-125	JES-05-125	32.3284	-110.73	3.57686e+06	525372		12N	3576667	525433	2004-12-13	Middle Soldier Canyon	JES-05-125	340	8	Composite foliation gneissic mylonitic foliation Description				2124
JES-05-126	JES-05-126	32.3252	-110.732	3.57652e+06	525247		12N	3576322	525308	2004-12-13	Middle Soldier Canyon	JES-05-126	64	1	lineation stretch shape mylonitic Description				2161
JES-05-127	JES-05-127	32.3267	-110.732	3.57668e+06	525197		12N	3576481	525258	2004-12-13	Middle Soldier Canyon	JES-05-127	285	8	Composite foliation gneissic mylonitic foliation Description				2124
JES-05-127	JES-05-127	32.3267	-110.732	3.57668e+06	525197		12N	3576481	525258	2004-12-13	Middle Soldier Canyon	JES-05-127	61	7	lineation stretch shape mylonitic Description				2149
JES-05-128	JES-05-128	32.3274	-110.733	3.57676e+06	525171		12N	3576565	525232	2004-12-13	Middle Soldier Canyon	JES-05-128	325	8	Composite foliation gneissic mylonitic foliation Description				2124
JES-05-128	JES-05-128	32.3274	-110.733	3.57676e+06	525171		12N	3576565	525232	2004-12-13	Middle Soldier Canyon	JES-05-128	58	8	lineation stretch shape mylonitic Description		SW		2149
JES-05-129	JES-05-129	32.3281	-110.73	3.57684e+06	525430		12N	3576641	525491	2004-12-13	Middle Soldier Canyon	JES-05-129	287	10	Composite foliation gneissic mylonitic foliation Description				2124
JES-05-129	JES-05-129	32.3281	-110.73	3.57684e+06	525430		12N	3576641	525491	2004-12-13	Middle Soldier Canyon	JES-05-129	59	9	lineation stretch shape mylonitic Description				2149
JES-05-130	JES-05-130	32.3285	-110.728	3.57689e+06	525609		12N	3576689	525670	2004-12-13	Middle Soldier Canyon	JES-05-130	288	16	Composite foliation gneissic mylonitic foliation Description				2124
JES-05-131	JES-05-131	32.3286	-110.727	3.57689e+06	525676		12N	3576697	525737	2004-12-13	Middle Soldier Canyon	JES-05-131	61	11	lineation stretch shape mylonitic Description				2161
JES-05-132	JES-05-132	32.3288	-110.727	3.57692e+06	525725		12N	3576721	525786	2004-12-13	Middle Soldier Canyon	JES-05-132	63	8	lineation stretch shape mylonitic Description				2161
JES-05-133	JES-05-133	32.3353	-110.724	3.57764e+06	525937		12N	3577441	525998	2004-12-20	Gibbon Mtn E	JES-05-133	269	26	Composite foliation gneissic mylonitic foliation Description				2124
JES-05-133	JES-05-133	32.3353	-110.724	3.57764e+06	525937		12N	3577441	525998	2004-12-20	Gibbon Mtn E	JES-05-133	49	14	lineation mylonitic stretch shape directed Description		NE		4037
JES-05-134	JES-05-134	32.3351	-110.725	3.57761e+06	525834		12N	3577413	525895	2004-12-20	Gibbon Mtn E	JES-05-134	52	11	lineation mylonitic stretch shape directed Description		NE		4035
JES-05-136	JES-05-136	32.3344	-110.727	3.57754e+06	525662		12N	3577338	525723	2004-12-20	Gibbon Mtn E	JES-05-136	54	12	lineation stretch shape mylonitic Description				2161
JES-05-137	JES-05-137	32.335	-110.728	3.5776e+06	525636		12N	3577406	525697	2004-12-20	Gibbon Mtn E	JES-05-137	55	14	lineation mylonitic stretch shape directed Description		NE		4035
JES-05-138	JES-05-138	32.335	-110.729	3.5776e+06	525544		12N	3577407	525605	2004-12-20	Gibbon Mtn E	JES-05-138	63	12	lineation mylonitic stretch shape directed Description		NE		4035
JES-05-139	JES-05-139	32.3355	-110.73	3.57765e+06	525429		12N	3577454	525490	2004-12-20	Gibbon Mtn E	JES-05-139	50	10	lineation stretch shape mylonitic Description				2161
JES-05-140	JES-05-140	32.3356	-110.731	3.57766e+06	525346		12N	3577465	525407	2004-12-20	Gibbon Mtn E	JES-05-140	299	9	Composite foliation gneissic mylonitic foliation Description				2124
JES-05-142	JES-05-142	32.3358	-110.733	3.57768e+06	525164		12N	3577487	525225	2004-12-20	Gibbon Mtn E	JES-05-142	278	12	Composite foliation gneissic mylonitic foliation Description				2124
JES-05-142	JES-05-142	32.3358	-110.733	3.57768e+06	525164		12N	3577487	525225	2004-12-20	Gibbon Mtn E	JES-05-142	59	14	lineation stretch shape mylonitic Description				2161
JES-05-143	JES-05-143	32.3354	-110.733	3.57764e+06	525097		12N	3577442	525158	2004-12-20	Gibbon Mtn E	JES-05-143	251	10	Composite foliation gneissic mylonitic foliation Description				2124
JES-05-143	JES-05-143	32.3354	-110.733	3.57764e+06	525097		12N	3577442	525158	2004-12-20	Gibbon Mtn E	JES-05-143	59	5	lineation stretch shape mylonitic Description		NE		4037
JES-05-144	JES-05-144	32.3348	-110.734	3.57758e+06	525036		12N	3577380	525097	2004-12-20	Gibbon Mtn E	JES-05-144	60	7	lineation stretch shape mylonitic Description				2161
JES-05-145	JES-05-145	32.3346	-110.734	3.57756e+06	525022		12N	3577358	525083	2004-12-20	Gibbon Mtn E	JES-05-145	51	5	lineation mylonitic stretch shape directed Description		NE		4035
JES-05-146	JES-05-146	32.3344	-110.734	3.57753e+06	525002		12N	3577333	525063	2004-12-20	Gibbon Mtn E	JES-05-146	60	5	lineation stretch shape mylonitic Description				2161
JES-05-147	JES-05-147	32.3326	-110.736	3.57733e+06	524841		12N	3577133	524902	2004-12-20	Gibbon Mtn E	JES-05-147	245	1	lineation stretch shape mylonitic Description				2161
JES-05-148	JES-05-148	32.3317	-110.737	3.57723e+06	524759		12N	3577035	524820	2004-12-20	Gibbon Mtn E	JES-05-148	65	2	lineation stretch shape mylonitic Description				2161
JES-05-150	JES-05-150	32.3328	-110.737	3.57736e+06	524795		12N	3577160	524856	2004-12-20	Gibbon Mtn E	JES-05-150	240	11	Composite foliation gneissic mylonitic foliation Description				2124
JES-05-151	JES-05-151	32.3335	-110.736	3.57743e+06	524812		12N	3577233	524873	2004-12-20	Gibbon Mtn E	JES-05-151	58	1	lineation stretch shape mylonitic Description				2161
JES-05-154	JES-05-154	32.3356	-110.737	3.57767e+06	524717		12N	3577471	524778	2004-12-20	Gibbon Mtn E	JES-05-154	54	10	lineation stretch shape mylonitic Description				2161
JES-05-155	JES-05-155	32.3372	-110.738	3.57785e+06	524663		12N	3577648	524724	2004-12-20	Gibbon Mtn E	JES-05-155	50	4	lineation stretch shape mylonitic Description				2161
JES-05-156	JES-05-156	32.3377	-110.739	3.5779e+06	524590		12N	3577698	524651	2004-12-20	Gibbon Mtn E	JES-05-156	49	9	lineation stretch shape mylonitic Description				2161
JES-05-157	JES-05-157	32.3388	-110.74	3.57802e+06	524507		12N	3577827	524568	2004-12-20	Gibbon Mtn E	JES-05-157	51	1	lineation stretch shape mylonitic Description				2161
JES-05-158	JES-05-158	32.3395	-110.741	3.57809e+06	524417		12N	3577897	524478	2004-12-20	Gibbon Mtn E	JES-05-158	231	1	lineation stretch shape mylonitic Description				2161
JES-05-159	JES-05-159	32.3389	-110.744	3.57803e+06	524082		12N	3577829	524143	2004-12-20	Gibbon Mtn E	JES-05-159	51	8	lineation stretch shape mylonitic Description				2161
JES-05-160	JES-05-160	32.339	-110.744	3.57804e+06	524095		12N	3577839	524156	2004-12-20	Gibbon Mtn E	JES-05-160	36	12	Composite foliation gneissic mylonitic foliation Description				2124
JES-05-160	JES-05-160	32.339	-110.744	3.57804e+06	524095		12N	3577839	524156	2004-12-20	Gibbon Mtn E	JES-05-160	55	4	lineation stretch shape mylonitic Description				2149
JES-05-161	JES-05-161	32.3394	-110.743	3.57809e+06	524206		12N	3577894	524267	2004-12-20	Gibbon Mtn E	JES-05-161	52	9	lineation stretch shape mylonitic Description				2161
JES-05-163	JES-05-163	32.3375	-110.727	3.57788e+06	525690		12N	3577683	525751	2004-12-20	Gibbon Mtn E	JES-05-163	48	10	lineation stretch shape mylonitic Description				2161
JES-05-164	JES-05-164	32.337	-110.727	3.57783e+06	525730		12N	3577631	525791	2004-12-20	Gibbon Mtn E	JES-05-164	285	26	Composite foliation gneissic mylonitic foliation Description				2124
JES-05-165	JES-05-165	32.3377	-110.732	3.57791e+06	525211		12N	3577708	525272	2004-12-27	Gibbon Mtn SE	JES-05-165	261	20	Composite foliation gneissic mylonitic foliation Description				2124
JES-05-165	JES-05-165	32.3377	-110.732	3.57791e+06	525211		12N	3577708	525272	2004-12-27	Gibbon Mtn SE	JES-05-165	50	9	lineation stretch shape mylonitic Description				2149
JES-05-166	JES-05-166	32.3337	-110.74	3.57745e+06	524463		12N	3577256	524524	2004-12-27	Gibbon Mtn SE	JES-05-166	249	18	Composite foliation gneissic mylonitic foliation Description				2124
JES-05-166	JES-05-166	32.3337	-110.74	3.57745e+06	524463		12N	3577256	524524	2004-12-27	Gibbon Mtn SE	JES-05-166	56	6	lineation stretch shape mylonitic Description				2149
JES-05-167	JES-05-167	32.3332	-110.743	3.5774e+06	524192		12N	3577200	524253	2004-12-27	Gibbon Mtn SE	JES-05-167	250	10	Composite foliation gneissic mylonitic foliation Description				2124
JES-05-167	JES-05-167	32.3332	-110.743	3.5774e+06	524192		12N	3577200	524253	2004-12-27	Gibbon Mtn SE	JES-05-167	60	3	lineation stretch shape mylonitic Description				2149
JES-05-168	JES-05-168	32.3318	-110.745	3.57724e+06	524042		12N	3577041	524103	2004-12-27	Gibbon Mtn SE	JES-05-168	237	18	Composite foliation gneissic mylonitic foliation Description				2124
JES-05-168	JES-05-168	32.3318	-110.745	3.57724e+06	524042		12N	3577041	524103	2004-12-27	Gibbon Mtn SE	JES-05-168	60	0	lineation mylonitic stretch shape directed Description		NE		4037
JES-05-169	JES-05-169	32.3304	-110.744	3.57709e+06	524053		12N	3576893	524114	2004-12-27	Gibbon Mtn SE	JES-05-169	30	2	Composite foliation gneissic mylonitic foliation Description				2124
JES-05-169	JES-05-169	32.3304	-110.744	3.57709e+06	524053		12N	3576893	524114	2004-12-27	Gibbon Mtn SE	JES-05-169	60	1	lineation mylonitic stretch shape directed Description		NE		4037
JES-05-170	JES-05-170	32.3285	-110.746	3.57688e+06	523923		12N	3576678	523984	2004-12-27	Gibbon Mtn SE	JES-05-170	210	7	Composite foliation gneissic mylonitic foliation Description				2124
JES-05-170	JES-05-170	32.3285	-110.746	3.57688e+06	523923		12N	3576678	523984	2004-12-27	Gibbon Mtn SE	JES-05-170	241	2	lineation stretch shape mylonitic Description				2149
JES-05-171	JES-05-171	32.3262	-110.746	3.57662e+06	523910		12N	3576422	523971	2004-12-27	Gibbon Mtn SE	JES-05-171	42	8	Composite foliation gneissic mylonitic foliation Description				2124
JES-05-171	JES-05-171	32.3262	-110.746	3.57662e+06	523910		12N	3576422	523971	2004-12-27	Gibbon Mtn SE	JES-05-171	65	1	lineation stretch shape mylonitic Description				2149
JES-05-172	JES-05-172	32.3248	-110.746	3.57647e+06	523918		12N	3576271	523979	2004-12-27	Gibbon Mtn SE	JES-05-172	212	8	Composite foliation gneissic mylonitic foliation Description				2124
JES-05-172	JES-05-172	32.3248	-110.746	3.57647e+06	523918		12N	3576271	523979	2004-12-27	Gibbon Mtn SE	JES-05-172	247	7	lineation stretch shape mylonitic Description		SW		2149
JES-05-173	JES-05-173	32.3237	-110.748	3.57634e+06	523739		12N	3576147	523800	2004-12-27	Gibbon Mtn SE	JES-05-173	112	12	Composite foliation gneissic mylonitic foliation Description				2124
JES-05-173	JES-05-173	32.3237	-110.748	3.57634e+06	523739		12N	3576147	523800	2004-12-27	Gibbon Mtn SE	JES-05-173	245	10	lineation stretch shape mylonitic Description				2149
JES-05-174	JES-05-174	32.328	-110.748	3.57683e+06	523710		12N	3576629	523771	2004-12-27	Gibbon Mtn SE	JES-05-174	237	1	lineation stretch shape mylonitic Description
JES-05-175	JES-05-175	32.3284	-110.748	3.57686e+06	523711		12N	3576663	523772	2004-12-27	Gibbon Mtn SE	JES-05-175	243	1	lineation stretch shape mylonitic Description				2161
JES-05-176	JES-05-176	32.3289	-110.746	3.57692e+06	523928		12N	3576722	523989	2004-12-27	Gibbon Mtn SE	JES-05-176	0	0	Composite foliation gneissic mylonitic foliation Description				2124
JES-05-176	JES-05-176	32.3289	-110.746	3.57692e+06	523928		12N	3576722	523989	2004-12-27	Gibbon Mtn SE	JES-05-176	63	0	lineation mylonitic stretch shape directed Description		NE		4037
JES-05-177	JES-05-177	32.3287	-110.746	3.5769e+06	523930		12N	3576703	523991	2004-12-27	Gibbon Mtn SE	JES-05-177	58	1	lineation mylonitic stretch shape directed Description		SW		4039
JES-05-178	JES-05-178	32.3325	-110.744	3.57733e+06	524098		12N	3577128	524159	2004-12-27	Gibbon Mtn SE	JES-05-178	245	17	Composite foliation gneissic mylonitic foliation Description				2124
JES-05-178	JES-05-178	32.3325	-110.744	3.57733e+06	524098		12N	3577128	524159	2004-12-27	Gibbon Mtn SE	JES-05-178	59	2	lineation stretch shape mylonitic Description				2149
JES-05-179	JES-05-179	32.3343	-110.745	3.57752e+06	524044		12N	3577318	524105	2004-12-27	Gibbon Mtn SE	JES-05-179	270	17	Composite foliation gneissic mylonitic foliation Description				2124
JES-05-180	JES-05-180	32.3349	-110.743	3.57759e+06	524170		12N	3577389	524231	2004-12-27	Gibbon Mtn SE	JES-05-180	236	13	Composite foliation gneissic mylonitic foliation Description				2124
JES-05-180	JES-05-180	32.3349	-110.743	3.57759e+06	524170		12N	3577389	524231	2004-12-27	Gibbon Mtn SE	JES-05-180	53	5	lineation stretch shape mylonitic Description				2149
JES-05-181	JES-05-181	32.332	-110.741	3.57727e+06	524385		12N	3577068	524446	2004-12-27	Gibbon Mtn SE	JES-05-181	61	1	lineation stretch shape mylonitic Description				2161
JES-05-182	JES-05-182	32.316	-110.744	3.57549e+06	524139		12N	3575292	524200	2004-12-30	Lower Soldier Cyn	JES-05-182	59	2	lineation stretch shape mylonitic Description				2161
JES-05-183	JES-05-183	32.3174	-110.745	3.57565e+06	523963		12N	3575449	524024	2004-12-30	Lower Soldier Cyn	JES-05-183	240	8	Composite foliation gneissic mylonitic foliation Description				2124
JES-05-183	JES-05-183	32.3174	-110.745	3.57565e+06	523963		12N	3575449	524024	2004-12-30	Lower Soldier Cyn	JES-05-183	255	2	lineation stretch shape mylonitic Description				2149
JES-05-184	JES-05-184	32.3176	-110.746	3.57567e+06	523943		12N	3575474	524004	2004-12-30	Lower Soldier Cyn	JES-05-184		0	Composite foliation gneissic mylonitic foliation Description				3774
JES-05-184	JES-05-184	32.3176	-110.746	3.57567e+06	523943		12N	3575474	524004	2004-12-30	Lower Soldier Cyn	JES-05-184	55	0	lineation stretch shape mylonitic Description				2149
JES-05-185	JES-05-185	32.3167	-110.745	3.57557e+06	523982		12N	3575371	524043	2004-12-30	Lower Soldier Cyn	JES-05-185	94	9	Composite foliation gneissic mylonitic foliation Description				2124
JES-05-185	JES-05-185	32.3167	-110.745	3.57557e+06	523982		12N	3575371	524043	2004-12-30	Lower Soldier Cyn	JES-05-185	67	11	lineation mylonitic stretch shape directed Description				4042
JES-05-186	JES-05-186	32.3179	-110.744	3.5757e+06	524136		12N	3575505	524197	2004-12-30	Lower Soldier Cyn	JES-05-186	306	4	Composite foliation gneissic mylonitic foliation Description				2124
JES-05-186	JES-05-186	32.3179	-110.744	3.5757e+06	524136		12N	3575505	524197	2004-12-30	Lower Soldier Cyn	JES-05-186	66	3	lineation mylonitic stretch shape directed Description
JES-05-188	JES-05-188	32.3167	-110.742	3.57558e+06	524279		12N	3575378	524340	2004-12-30	Lower Soldier Cyn	JES-05-188	237	3	lineation stretch shape mylonitic Description		SW		2161
JES-05-189	JES-05-189	32.3158	-110.743	3.57547e+06	524157		12N	3575273	524218	2004-12-30	Lower Soldier Cyn	JES-05-189	70	8	Composite foliation gneissic mylonitic foliation Description				2124
JES-05-189	JES-05-189	32.3158	-110.743	3.57547e+06	524157		12N	3575273	524218	2004-12-30	Lower Soldier Cyn	JES-05-189	238	1	lineation stretch shape mylonitic Description				2149
JES-05-190	JES-05-190	32.3145	-110.717	3.57534e+06	526602		12N	3575139	526663	2004-12-31	Lower Soldier Cyn	JES-05-190	86	23	Composite foliation gneissic mylonitic foliation Description				2124
JES-05-190	JES-05-190	32.3145	-110.717	3.57534e+06	526602		12N	3575139	526663	2004-12-31	Lower Soldier Cyn	JES-05-190	246	12	lineation stretch shape mylonitic Description		SW		2149
JES-05-207	JES-05-207	32.3343	-110.746	3.57752e+06	523895		12N	3577325	523956	2005-01-20	Gibbon Mtn SW	JES-05-207	56	5	lineation stretch shape mylonitic Description				2161
JES-05-208	JES-05-208	32.3342	-110.747	3.5775e+06	523843		12N	3577307	523904	2005-01-20	Gibbon Mtn SW	JES-05-208	355	3	Composite foliation gneissic mylonitic foliation Description				2124
JES-05-209	JES-05-209	32.334	-110.749	3.57749e+06	523663		12N	3577291	523724	2005-01-20	Gibbon Mtn SW	JES-05-209	60	6	lineation stretch shape mylonitic Description				2161
JES-05-210	JES-05-210	32.334	-110.749	3.57749e+06	523634		12N	3577294	523695	2005-01-20	Gibbon Mtn SW	JES-05-210	275	10	Composite foliation gneissic mylonitic foliation Description				2124
JES-05-211	JES-05-211	32.3335	-110.75	3.57743e+06	523491		12N	3577230	523552	2005-01-20	Gibbon Mtn SW	JES-05-211	273	4	Composite foliation gneissic mylonitic foliation Description				2124
JES-05-212	JES-05-212	32.3332	-110.752	3.5774e+06	523378		12N	3577198	523439	2005-01-20	Gibbon Mtn SW	JES-05-212	271	11	Composite foliation gneissic mylonitic foliation Description				2124
JES-05-212	JES-05-212	32.3332	-110.752	3.5774e+06	523378		12N	3577198	523439	2005-01-20	Gibbon Mtn SW	JES-05-212	55	7	lineation stretch shape mylonitic Description				2149
JES-05-213	JES-05-213	32.3323	-110.753	3.5773e+06	523282		12N	3577099	523343	2005-01-20	Gibbon Mtn SW	JES-05-213	61	0	lineation stretch shape mylonitic Description				2161
JES-05-215	JES-05-215	32.3317	-110.753	3.57723e+06	523231		12N	3577037	523292	2005-01-20	Gibbon Mtn SW	JES-05-215	240	2	lineation stretch shape mylonitic Description				2161
JES-05-216	JES-05-216	32.3306	-110.754	3.57711e+06	523189		12N	3576914	523250	2005-01-20	Gibbon Mtn SW	JES-05-216	61	9	lineation stretch shape mylonitic Description				2161
JES-05-217	JES-05-217	32.3298	-110.754	3.57702e+06	523124		12N	3576823	523185	2005-01-20	Gibbon Mtn SW	JES-05-217	64	2	lineation stretch shape mylonitic Description		SW		2161
JES-05-218	JES-05-218	32.3293	-110.756	3.57697e+06	523010		12N	3576771	523071	2005-01-20	Gibbon Mtn SW	JES-05-218	250	4	Composite foliation gneissic mylonitic foliation Description				2124
JES-05-218	JES-05-218	32.3293	-110.756	3.57697e+06	523010		12N	3576771	523071	2005-01-20	Gibbon Mtn SW	JES-05-218	61	0	lineation stretch shape mylonitic Description				2149
JES-05-219	JES-05-219	32.3283	-110.758	3.57686e+06	522798		12N	3576659	522859	2005-01-20	Gibbon Mtn SW	JES-05-219	67	1	lineation stretch shape mylonitic Description				2161
JES-05-220	JES-05-220	32.3275	-110.759	3.57677e+06	522699		12N	3576569	522760	2005-01-20	Gibbon Mtn SW	JES-05-220	108	3	Composite foliation gneissic mylonitic foliation Description				2124
JES-05-220	JES-05-220	32.3275	-110.759	3.57677e+06	522699		12N	3576569	522760	2005-01-20	Gibbon Mtn SW	JES-05-220	243	2	lineation stretch shape mylonitic Description		SW		2149
JES-05-221	JES-05-221	32.3257	-110.759	3.57657e+06	522672		12N	3576370	522733	2005-01-20	Gibbon Mtn SW	JES-05-221	95	11	Composite foliation gneissic mylonitic foliation Description				2124
JES-05-221	JES-05-221	32.3257	-110.759	3.57657e+06	522672		12N	3576370	522733	2005-01-20	Gibbon Mtn SW	JES-05-221	243	5	lineation stretch shape mylonitic Description				2149
JES-05-222	JES-05-222	32.3257	-110.76	3.57656e+06	522630		12N	3576361	522691	2005-01-20	Gibbon Mtn SW	JES-05-222	143	8	Composite foliation gneissic mylonitic foliation Description				2124
JES-05-222	JES-05-222	32.3257	-110.76	3.57656e+06	522630		12N	3576361	522691	2005-01-20	Gibbon Mtn SW	JES-05-222	245	7	lineation stretch shape mylonitic Description				2149
JES-05-223	JES-05-223	32.3252	-110.759	3.57651e+06	522695		12N	3576311	522756	2005-01-20	Gibbon Mtn SW	JES-05-223	239	3	lineation stretch shape mylonitic Description		SW		2161
JES-05-224	JES-05-224	32.3252	-110.76	3.57651e+06	522636		12N	3576311	522697	2005-01-20	Gibbon Mtn SW	JES-05-224	125	4	Composite foliation gneissic mylonitic foliation Description				2124
JES-05-224	JES-05-224	32.3252	-110.76	3.57651e+06	522636		12N	3576311	522697	2005-01-20	Gibbon Mtn SW	JES-05-224	63	3	lineation stretch shape mylonitic Description		SW		2149
JES-05-225	JES-05-225	32.3302	-110.753	3.57706e+06	523216		12N	3576861	523277	2005-01-20	Gibbon Mtn SW	JES-05-225	65	1	lineation stretch shape mylonitic Description				2161
JES-05-226	JES-05-226	32.3315	-110.751	3.57721e+06	523437		12N	3577008	523498	2005-01-20	Gibbon Mtn SW	JES-05-226	243	4	lineation stretch shape mylonitic Description				2161
JES-05-227	JES-05-227	32.3314	-110.75	3.5772e+06	523497		12N	3577002	523558	2005-01-20	Gibbon Mtn SW	JES-05-227	275	10	Composite foliation gneissic mylonitic foliation Description				2124
JES-05-228	JES-05-228	32.3323	-110.749	3.5773e+06	523596		12N	3577103	523657	2005-01-20	Gibbon Mtn SW	JES-05-228	38	10	Composite foliation gneissic mylonitic foliation Description				2124
JES-05-228	JES-05-228	32.3323	-110.749	3.5773e+06	523596		12N	3577103	523657	2005-01-20	Gibbon Mtn SW	JES-05-228	59	4	lineation stretch shape mylonitic Description				2149
JES-05-229	JES-05-229	32.3328	-110.748	3.57736e+06	523712		12N	3577159	523773	2005-01-20	Gibbon Mtn SW	JES-05-229	200	9	Composite foliation gneissic mylonitic foliation Description				2124
JES-05-230	JES-05-230	32.3328	-110.746	3.57735e+06	523890		12N	3577151	523951	2005-01-20	Gibbon Mtn SW	JES-05-230	61	2	lineation stretch shape mylonitic Description				2161
JES-05-231	JES-05-231	32.3331	-110.745	3.57739e+06	523978		12N	3577190	524039	2005-01-20	Gibbon Mtn SW	JES-05-231	12	7	Composite foliation gneissic mylonitic foliation Description				2124
JES-05-231	JES-05-231	32.3331	-110.745	3.57739e+06	523978		12N	3577190	524039	2005-01-20	Gibbon Mtn SW	JES-05-231	63	5	lineation stretch shape mylonitic Description				2149
JES-05-232	JES-05-232	32.3334	-110.744	3.57742e+06	524088		12N	3577226	524149	2005-01-20	Gibbon Mtn SW	JES-05-232	59	10	lineation stretch shape mylonitic Description				2161
JES-05-236	JES-05-236	32.3101	-110.719	3.57485e+06	526478		12N	3574650	526539	2005-01-25	Babad Do'ag N	JES-05-236	95	17	Composite foliation gneissic mylonitic foliation Description				2124
JES-05-236	JES-05-236	32.3101	-110.719	3.57485e+06	526478		12N	3574650	526539	2005-01-25	Babad Do'ag N	JES-05-236	242	9	lineation mylonitic stretch shape directed Description		SW		4042
JES-05-238	JES-05-238	32.3114	-110.717	3.57499e+06	526664		12N	3574789	526725	2005-01-25	Babad Do'ag N	JES-05-238	241	1	lineation stretch shape mylonitic Description				2161
JES-05-240	JES-05-240	32.3124	-110.718	3.5751e+06	526585		12N	3574900	526646	2005-01-25	Babad Do'ag N	JES-05-240	84	17	Composite foliation gneissic mylonitic foliation Description				2124
JES-05-240	JES-05-240	32.3124	-110.718	3.5751e+06	526585		12N	3574900	526646	2005-01-25	Babad Do'ag N	JES-05-240	245	8	lineation stretch shape mylonitic Description		SW		2149
JES-05-242	JES-05-242	32.3148	-110.718	3.57537e+06	526531		12N	3575173	526592	2005-01-25	Babad Do'ag N	JES-05-242	83	22	Composite foliation gneissic mylonitic foliation Description				2124
JES-05-242	JES-05-242	32.3148	-110.718	3.57537e+06	526531		12N	3575173	526592	2005-01-25	Babad Do'ag N	JES-05-242	246	8	lineation stretch shape mylonitic Description		SW		2149
JES-05-243	JES-05-243	32.3152	-110.717	3.5754e+06	526650		12N	3575207	526711	2005-01-25	Babad Do'ag N	JES-05-243	252	11	lineation mylonitic stretch shape directed Description		SW		4042
JES-05-244	JES-05-244	32.3171	-110.714	3.57562e+06	526890		12N	3575424	526951	2005-01-25	Babad Do'ag N	JES-05-244	249	8	lineation stretch shape mylonitic Description				2161
JES-05-245	JES-05-245	32.3174	-110.714	3.57566e+06	526950		12N	3575461	527011	2005-01-25	Babad Do'ag N	JES-05-245	85	14	Composite foliation gneissic mylonitic foliation Description				2124
JES-05-245	JES-05-245	32.3174	-110.714	3.57566e+06	526950		12N	3575461	527011	2005-01-25	Babad Do'ag N	JES-05-245	249	8	lineation stretch shape mylonitic Description				2149
JES-05-246	JES-05-246	32.3176	-110.714	3.57568e+06	526930		12N	3575483	526991	2005-01-25	Babad Do'ag N	JES-05-246	252	7	lineation stretch shape mylonitic Description		NE		2161
JES-05-247	JES-05-247	32.3176	-110.715	3.57568e+06	526865		12N	3575483	526926	2005-01-25	Babad Do'ag N	JES-05-247	88	20	Composite foliation gneissic mylonitic foliation Description				2124
JES-05-248	JES-05-248	32.3176	-110.715	3.57568e+06	526861		12N	3575482	526922	2005-01-25	Babad Do'ag N	JES-05-248	248	0	lineation stretch shape mylonitic Description		SW		2161
JES-05-249	JES-05-249	32.318	-110.717	3.57572e+06	526685		12N	3575518	526746	2005-01-25	Babad Do'ag N	JES-05-249	253	9	lineation stretch shape mylonitic Description				2161
JES-05-253	JES-05-253	32.3207	-110.713	3.57602e+06	526975		12N	3575827	527036	2005-01-25	Babad Do'ag N	JES-05-253	251	4	lineation stretch shape mylonitic Description				2161
JES-05-254	JES-05-254	32.3211	-110.713	3.57607e+06	527034		12N	3575870	527095	2005-01-25	Babad Do'ag N	JES-05-254	247	8	lineation stretch shape mylonitic Description				2161
JES-05-256	JES-05-256	32.3231	-110.711	3.57629e+06	527156		12N	3576089	527217	2005-01-25	Babad Do'ag N	JES-05-256	241	4	lineation stretch shape mylonitic Description		SW		2161
JES-05-258	JES-05-258	32.322	-110.719	3.57616e+06	526457		12N	3575961	526518	2005-01-25	Babad Do'ag N	JES-05-258	105	8	Composite foliation gneissic mylonitic foliation Description				2124
JES-05-258	JES-05-258	32.322	-110.719	3.57616e+06	526457		12N	3575961	526518	2005-01-25	Babad Do'ag N	JES-05-258	246	6	lineation mylonitic stretch shape directed Description		SW		4042
JES-05-259	JES-05-259	32.321	-110.721	3.57605e+06	526303		12N	3575853	526364	2005-01-25	Babad Do'ag N	JES-05-259	245	4	lineation stretch shape mylonitic Description				2161
JES-05-260	JES-05-260	32.3198	-110.722	3.57592e+06	526201		12N	3575721	526262	2005-01-25	Babad Do'ag N	JES-05-260	108	11	Composite foliation gneissic mylonitic foliation Description				2124
JES-05-260	JES-05-260	32.3198	-110.722	3.57592e+06	526201		12N	3575721	526262	2005-01-25	Babad Do'ag N	JES-05-260	246	7	lineation stretch shape mylonitic Description				2149
JES-05-262	JES-05-262	32.3181	-110.723	3.57573e+06	526082		12N	3575537	526143	2005-01-25	Babad Do'ag N	JES-05-262	249	7	lineation stretch shape mylonitic Description				2161
JES-05-263	JES-05-263	32.3173	-110.723	3.57564e+06	526051		12N	3575442	526112	2005-01-25	Babad Do'ag N	JES-05-263	72	16	Composite foliation gneissic mylonitic foliation Description				2124
JES-05-263	JES-05-263	32.3173	-110.723	3.57564e+06	526051		12N	3575442	526112	2005-01-25	Babad Do'ag N	JES-05-263	246	5	lineation stretch shape mylonitic Description				2149
JES-05-264	JES-05-264	32.3143	-110.722	3.57531e+06	526211		12N	3575109	526272	2005-01-25	Babad Do'ag N	JES-05-264	248	3	lineation stretch shape mylonitic Description				2161
JES-05-265	JES-05-265	32.3134	-110.721	3.57521e+06	526256		12N	3575011	526317	2005-01-25	Babad Do'ag N	JES-05-265	92	12	Composite foliation gneissic mylonitic foliation Description				2124
JES-05-265	JES-05-265	32.3134	-110.721	3.57521e+06	526256		12N	3575011	526317	2005-01-25	Babad Do'ag N	JES-05-265	245	6	lineation stretch shape mylonitic Description				2149
JES-05-266	JES-05-266	32.3124	-110.722	3.5751e+06	526207		12N	3574906	526268	2005-01-25	Babad Do'ag N	JES-05-266	84	20	Composite foliation gneissic mylonitic foliation Description				2124
JES-05-266	JES-05-266	32.3124	-110.722	3.5751e+06	526207		12N	3574906	526268	2005-01-25	Babad Do'ag N	JES-05-266	244	8	lineation stretch shape mylonitic Description				2149
JES-05-268	JES-05-268	32.3053	-110.746	3.5743e+06	523947		12N	3574103	524008	2005-01-28	Soldier Cyn, lower, west ridge	JES-05-268	96	19	Composite foliation gneissic mylonitic foliation Description				2124
JES-05-268	JES-05-268	32.3053	-110.746	3.5743e+06	523947		12N	3574103	524008	2005-01-28	Soldier Cyn, lower, west ridge	JES-05-268	262	14	lineation stretch shape mylonitic Description				2149
JES-05-269	JES-05-269	32.306	-110.747	3.57438e+06	523854		12N	3574183	523915	2005-01-28	Soldier Cyn, lower, west ridge	JES-05-269	251	9	lineation stretch shape mylonitic Description				2161
JES-05-270	JES-05-270	32.3061	-110.748	3.57439e+06	523757		12N	3574195	523818	2005-01-28	Soldier Cyn, lower, west ridge	JES-05-270	80	34	Composite foliation gneissic mylonitic foliation Description				2124
JES-05-270	JES-05-270	32.3061	-110.748	3.57439e+06	523757		12N	3574195	523818	2005-01-28	Soldier Cyn, lower, west ridge	JES-05-270	251	9	lineation stretch shape mylonitic Description				2149
JES-05-271	JES-05-271	32.306	-110.748	3.57438e+06	523732		12N	3574187	523793	2005-01-28	Soldier Cyn, lower, west ridge	JES-05-271	247	10	lineation mylonitic stretch shape directed Description		SW		4039
JES-05-272	JES-05-272	32.3067	-110.749	3.57446e+06	523594		12N	3574267	523655	2005-01-28	Soldier Cyn, lower, west ridge	JES-05-272	90	28	Composite foliation gneissic mylonitic foliation Description				2124
JES-05-272	JES-05-272	32.3067	-110.749	3.57446e+06	523594		12N	3574267	523655	2005-01-28	Soldier Cyn, lower, west ridge	JES-05-272	249	13	lineation stretch shape mylonitic Description				2149
JES-05-273	JES-05-273	32.3075	-110.75	3.57455e+06	523517		12N	3574349	523578	2005-01-28	Soldier Cyn, lower, west ridge	JES-05-273	91	22	Composite foliation gneissic mylonitic foliation Description				2124
JES-05-273	JES-05-273	32.3075	-110.75	3.57455e+06	523517		12N	3574349	523578	2005-01-28	Soldier Cyn, lower, west ridge	JES-05-273	248	13	lineation stretch shape mylonitic Description				2149
JES-05-274	JES-05-274	32.3085	-110.75	3.57466e+06	523523		12N	3574466	523584	2005-01-28	Soldier Cyn, lower, west ridge	JES-05-274	120	20	Composite foliation gneissic mylonitic foliation Description				2124
JES-05-274	JES-05-274	32.3085	-110.75	3.57466e+06	523523		12N	3574466	523584	2005-01-28	Soldier Cyn, lower, west ridge	JES-05-274	240	9	lineation stretch shape mylonitic Description				2149
JES-05-275	JES-05-275	32.3131	-110.747	3.57517e+06	523801		12N	3574969	523862	2005-01-28	Soldier Cyn, lower, west ridge	JES-05-275	250	9	lineation stretch shape mylonitic Description				2161
JES-05-276	JES-05-276	32.3133	-110.747	3.57519e+06	523847		12N	3574995	523908	2005-01-28	Soldier Cyn, lower, west ridge	JES-05-276	109	16	Composite foliation gneissic mylonitic foliation Description				2124
JES-05-276	JES-05-276	32.3133	-110.747	3.57519e+06	523847		12N	3574995	523908	2005-01-28	Soldier Cyn, lower, west ridge	JES-05-276	245	9	lineation stretch shape mylonitic Description				2149
JES-05-277	JES-05-277	32.315	-110.747	3.57539e+06	523816		12N	3575188	523877	2005-01-28	Soldier Cyn, lower, west ridge	JES-05-277	80	22	Composite foliation gneissic mylonitic foliation Description				2124
JES-05-277	JES-05-277	32.315	-110.747	3.57539e+06	523816		12N	3575188	523877	2005-01-28	Soldier Cyn, lower, west ridge	JES-05-277	245	8	lineation stretch shape mylonitic Description				2149
JES-05-278	JES-05-278	32.3154	-110.747	3.57543e+06	523797		12N	3575232	523858	2005-01-28	Soldier Cyn, lower, west ridge	JES-05-278	249	9	lineation stretch shape mylonitic Description				2161
JES-05-279	JES-05-279	32.3167	-110.747	3.57556e+06	523798		12N	3575367	523859	2005-01-28	Soldier Cyn, lower, west ridge	JES-05-279	246	4	lineation stretch shape mylonitic Description				2161
JES-05-280	JES-05-280	32.3184	-110.747	3.57576e+06	523772		12N	3575565	523833	2005-01-28	Soldier Cyn, lower, west ridge	JES-05-280	247	4	lineation stretch shape mylonitic Description				2161
JES-05-281	JES-05-281	32.3194	-110.748	3.57587e+06	523715		12N	3575676	523776	2005-01-28	Soldier Cyn, lower, west ridge	JES-05-281	133	12	Composite foliation gneissic mylonitic foliation Description				2124
JES-05-281	JES-05-281	32.3194	-110.748	3.57587e+06	523715		12N	3575676	523776	2005-01-28	Soldier Cyn, lower, west ridge	JES-05-281	250	5	lineation stretch shape mylonitic Description				2149
JES-05-282	JES-05-282	32.3208	-110.748	3.57602e+06	523737		12N	3575822	523798	2005-01-28	Soldier Cyn, lower, west ridge	JES-05-282	250	6	lineation stretch shape mylonitic Description				2161
JES-05-283	JES-05-283	32.3212	-110.749	3.57607e+06	523584		12N	3575873	523645	2005-01-28	Soldier Cyn, lower, west ridge	JES-05-283	243	7	lineation stretch shape mylonitic Description				2161
JES-05-284	JES-05-284	32.3206	-110.751	3.576e+06	523457		12N	3575798	523518	2005-01-28	Soldier Cyn, lower, west ridge	JES-05-284	112	11	Composite foliation gneissic mylonitic foliation Description				2124
JES-05-284	JES-05-284	32.3206	-110.751	3.576e+06	523457		12N	3575798	523518	2005-01-28	Soldier Cyn, lower, west ridge	JES-05-284	245	9	lineation stretch shape mylonitic Description				2149
JES-05-285	JES-05-285	32.3196	-110.752	3.57589e+06	523349		12N	3575692	523410	2005-01-28	Soldier Cyn, lower, west ridge	JES-05-285	92	13	Composite foliation gneissic mylonitic foliation Description				2124
JES-05-285	JES-05-285	32.3196	-110.752	3.57589e+06	523349		12N	3575692	523410	2005-01-28	Soldier Cyn, lower, west ridge	JES-05-285	247	8	lineation stretch shape mylonitic Description				2149
JES-05-286	JES-05-286	32.3191	-110.752	3.57583e+06	523324		12N	3575632	523385	2005-01-28	Soldier Cyn, lower, west ridge	JES-05-286	95	14	Composite foliation gneissic mylonitic foliation Description				2124
JES-05-286	JES-05-286	32.3191	-110.752	3.57583e+06	523324		12N	3575632	523385	2005-01-28	Soldier Cyn, lower, west ridge	JES-05-286	246	9	lineation stretch shape mylonitic Description				2149
JES-05-287	JES-05-287	32.317	-110.752	3.5756e+06	523306		12N	3575398	523367	2005-01-28	Soldier Cyn, lower, west ridge	JES-05-287	243	8	lineation stretch shape mylonitic Description				2161
JES-05-288	JES-05-288	32.3163	-110.753	3.57552e+06	523254		12N	3575326	523315	2005-01-28	Soldier Cyn, lower, west ridge	JES-05-288	88	22	Composite foliation gneissic mylonitic foliation Description				2124
JES-05-288	JES-05-288	32.3163	-110.753	3.57552e+06	523254		12N	3575326	523315	2005-01-28	Soldier Cyn, lower, west ridge	JES-05-288	243	11	lineation stretch shape mylonitic Description				2149
JES-05-289	JES-05-289	32.3155	-110.754	3.57544e+06	523156		12N	3575241	523217	2005-01-28	Soldier Cyn, lower, west ridge	JES-05-289	97	18	Composite foliation gneissic mylonitic foliation Description				2124
JES-05-289	JES-05-289	32.3155	-110.754	3.57544e+06	523156		12N	3575241	523217	2005-01-28	Soldier Cyn, lower, west ridge	JES-05-289	245	10	lineation stretch shape mylonitic Description				2149
JES-05-290	JES-05-290	32.3139	-110.753	3.57526e+06	523286		12N	3575060	523347	2005-01-28	Soldier Cyn, lower, west ridge	JES-05-290	113	20	Composite foliation gneissic mylonitic foliation Description				2124
JES-05-290	JES-05-290	32.3139	-110.753	3.57526e+06	523286		12N	3575060	523347	2005-01-28	Soldier Cyn, lower, west ridge	JES-05-290	246	10	lineation stretch shape mylonitic Description				2149
JES-05-291	JES-05-291	32.3125	-110.753	3.57511e+06	523280		12N	3574909	523341	2005-01-28	Soldier Cyn, lower, west ridge	JES-05-291	95	19	Composite foliation gneissic mylonitic foliation Description				2124
JES-05-291	JES-05-291	32.3125	-110.753	3.57511e+06	523280		12N	3574909	523341	2005-01-28	Soldier Cyn, lower, west ridge	JES-05-291	243	9	lineation mylonitic stretch shape directed Description		SW		4042
JES-05-292	JES-05-292	32.3094	-110.754	3.57476e+06	523112		12N	3574559	523173	2005-01-28	Soldier Cyn, lower, west ridge	JES-05-292	96	20	Composite foliation gneissic mylonitic foliation Description				2124
JES-05-292	JES-05-292	32.3094	-110.754	3.57476e+06	523112		12N	3574559	523173	2005-01-28	Soldier Cyn, lower, west ridge	JES-05-292	246	15	lineation stretch shape mylonitic Description				2149
JES-05-293	JES-05-293	32.3073	-110.753	3.57453e+06	523275		12N	3574331	523336	2005-01-28	Soldier Cyn, lower, west ridge	JES-05-293	99	20	Composite foliation gneissic mylonitic foliation Description				2124
JES-05-293	JES-05-293	32.3073	-110.753	3.57453e+06	523275		12N	3574331	523336	2005-01-28	Soldier Cyn, lower, west ridge	JES-05-293	244	9	lineation mylonitic stretch shape directed Description		SW		4042
JES-05-294	JES-05-294	32.3067	-110.751	3.57446e+06	523416		12N	3574262	523477	2005-01-28	Soldier Cyn, lower, west ridge	JES-05-294	90	26	Composite foliation gneissic mylonitic foliation Description				2124
JES-05-294	JES-05-294	32.3067	-110.751	3.57446e+06	523416		12N	3574262	523477	2005-01-28	Soldier Cyn, lower, west ridge	JES-05-294	250	13	lineation stretch shape mylonitic Description				2149
JES-05-295	JES-05-295	32.3065	-110.75	3.57443e+06	523555		12N	3574237	523616	2005-01-28	Soldier Cyn, lower, west ridge	JES-05-295	248	11	lineation stretch shape mylonitic Description				2161
JES-05-295	JES-05-295	32.3065	-110.75	3.57443e+06	523555		12N	3574237	523616	2005-01-28	Soldier Cyn, lower, west ridge	JES-05-295			Composite foliation gneissic mylonitic foliation Description
JES-05-296	JES-05-296	32.3054	-110.748	3.57432e+06	523686		12N	3574121	523747	2005-01-28	Soldier Cyn, lower, west ridge	JES-05-296	92	31	Composite foliation gneissic mylonitic foliation Description				2124
JES-05-298	JES-05-298	32.3045	-110.747	3.57421e+06	523852		12N	3574015	523913	2005-01-28	Soldier Cyn, lower, west ridge	JES-05-298	79	23	Composite foliation gneissic mylonitic foliation Description				2124
JES-05-298	JES-05-298	32.3045	-110.747	3.57421e+06	523852		12N	3574015	523913	2005-01-28	Soldier Cyn, lower, west ridge	JES-05-298	245	13	lineation stretch shape mylonitic Description				2149
JES-05-300	JES-05-300	32.344	-110.78	3.57859e+06	520681		12N	3578390	520742	2005-02-03	Sabino Cyn N, phoneline trail	JES-05-300	265	18	Composite foliation gneissic mylonitic foliation Description				2124
JES-05-301	JES-05-301	32.3441	-110.78	3.5786e+06	520724		12N	3578406	520785	2005-02-03	Sabino Cyn N, phoneline trail	JES-05-301	232	9	Composite foliation gneissic mylonitic foliation Description				2124
JES-05-301	JES-05-301	32.3441	-110.78	3.5786e+06	520724		12N	3578406	520785	2005-02-03	Sabino Cyn N, phoneline trail	JES-05-301	49	2	lineation stretch shape mylonitic Description				2149
JES-05-302	JES-05-302	32.3443	-110.779	3.57862e+06	520752		12N	3578421	520813	2005-02-03	Sabino Cyn N, phoneline trail	JES-05-302	253	20	Composite foliation gneissic mylonitic foliation Description				2124
JES-05-302	JES-05-302	32.3443	-110.779	3.57862e+06	520752		12N	3578421	520813	2005-02-03	Sabino Cyn N, phoneline trail	JES-05-302	49	9	lineation stretch shape mylonitic Description				2149
JES-05-303	JES-05-303	32.3444	-110.779	3.57863e+06	520813		12N	3578431	520874	2005-02-03	Sabino Cyn N, phoneline trail	JES-05-303	235	17	Composite foliation gneissic mylonitic foliation Description				2124
JES-05-303	JES-05-303	32.3444	-110.779	3.57863e+06	520813		12N	3578431	520874	2005-02-03	Sabino Cyn N, phoneline trail	JES-05-303	240	1	lineation stretch shape mylonitic Description				2149
JES-05-304	JES-05-304	32.3442	-110.779	3.57861e+06	520829		12N	3578415	520890	2005-02-03	Sabino Cyn N, phoneline trail	JES-05-304	54	5	lineation stretch shape mylonitic Description				2161
JES-05-305	JES-05-305	32.3442	-110.778	3.57861e+06	520897		12N	3578414	520958	2005-02-03	Sabino Cyn N, phoneline trail	JES-05-305	236	15	Composite foliation gneissic mylonitic foliation Description				2122
JES-05-305	JES-05-305	32.3442	-110.778	3.57861e+06	520897		12N	3578414	520958	2005-02-03	Sabino Cyn N, phoneline trail	JES-05-305	47	5	lineation stretch shape mylonitic Description				2149
JES-05-306	JES-05-306	32.3428	-110.779	3.57846e+06	520774		12N	3578259	520835	2005-02-03	Sabino Cyn N, phoneline trail	JES-05-306	256	21	Composite foliation gneissic mylonitic foliation Description				2124
JES-05-306	JES-05-306	32.3428	-110.779	3.57846e+06	520774		12N	3578259	520835	2005-02-03	Sabino Cyn N, phoneline trail	JES-05-306	53	8	lineation stretch shape mylonitic Description				2149
JES-05-307	JES-05-307	32.3425	-110.78	3.57843e+06	520728		12N	3578229	520789	2005-02-03	Sabino Cyn N, phoneline trail	JES-05-307	59	14	lineation stretch shape mylonitic Description				2161
JES-05-308	JES-05-308	32.3409	-110.78	3.57824e+06	520731		12N	3578046	520792	2005-02-03	Sabino Cyn N, phoneline trail	JES-05-308	85	22	Composite foliation gneissic mylonitic foliation Description				2124
JES-05-308	JES-05-308	32.3409	-110.78	3.57824e+06	520731		12N	3578046	520792	2005-02-03	Sabino Cyn N, phoneline trail	JES-05-308	59	13	lineation stretch shape mylonitic Description				2149
JES-05-309	JES-05-309	32.338	-110.781	3.57792e+06	520641		12N	3577722	520702	2005-02-03	Sabino Cyn N, phoneline trail	JES-05-309	65	7	lineation stretch shape mylonitic Description				2161
JES-05-310	JES-05-310	32.3375	-110.782	3.57787e+06	520503		12N	3577673	520564	2005-02-03	Sabino Cyn N, phoneline trail	JES-05-310	57	2	lineation stretch shape mylonitic Description				2161
JES-05-311	JES-05-311	32.3374	-110.782	3.57786e+06	520484		12N	3577658	520545	2005-02-03	Sabino Cyn N, phoneline trail	JES-05-311	270	9	Composite foliation gneissic mylonitic foliation Description				2124
JES-05-312	JES-05-312	32.3367	-110.783	3.57778e+06	520434		12N	3577578	520495	2005-02-03	Sabino Cyn N, phoneline trail	JES-05-312	258	13	Composite foliation gneissic mylonitic foliation Description				2124
JES-05-312	JES-05-312	32.3367	-110.783	3.57778e+06	520434		12N	3577578	520495	2005-02-03	Sabino Cyn N, phoneline trail	JES-05-312	57	5	lineation stretch shape mylonitic Description				2149
JES-05-313	JES-05-313	32.3359	-110.782	3.57769e+06	520491		12N	3577492	520552	2005-02-03	Sabino Cyn N, phoneline trail	JES-05-313	235	10	Composite foliation gneissic mylonitic foliation Description				2124
JES-05-313	JES-05-313	32.3359	-110.782	3.57769e+06	520491		12N	3577492	520552	2005-02-03	Sabino Cyn N, phoneline trail	JES-05-313	55	0	lineation stretch shape mylonitic Description				2149
JES-05-314	JES-05-314	32.3328	-110.785	3.57735e+06	520214		12N	3577150	520275	2005-02-03	Sabino Cyn N, phoneline trail	JES-05-314	57	8	lineation stretch shape mylonitic Description				2161
JES-05-315	JES-05-315	32.3307	-110.787	3.57711e+06	520071		12N	3576917	520132	2005-02-03	Sabino Cyn N, phoneline trail	JES-05-315	254	13	Composite foliation gneissic mylonitic foliation Description				2124
JES-05-315	JES-05-315	32.3307	-110.787	3.57711e+06	520071		12N	3576917	520132	2005-02-03	Sabino Cyn N, phoneline trail	JES-05-315	63	5	lineation stretch shape mylonitic Description				2149
JES-05-316	JES-05-316	32.3285	-110.79	3.57686e+06	519761		12N	3576666	519822	2005-02-03	Sabino Cyn, phoneline trail	JES-05-316	250	10	lineation stretch shape mylonitic Description				2161
JES-05-318	JES-05-318	32.3283	-110.791	3.57684e+06	519658		12N	3576645	519719	2005-02-03	Sabino Cyn, phoneline trail	JES-05-318	173	12	Composite foliation gneissic mylonitic foliation Description				2124
JES-05-319	JES-05-319	32.3282	-110.793	3.57684e+06	519525		12N	3576638	519586	2005-02-03	Sabino Cyn, phoneline trail	JES-05-319	142	7	Composite foliation gneissic mylonitic foliation Description				2124
JES-05-320	JES-05-320	32.3279	-110.793	3.5768e+06	519510		12N	3576599	519571	2005-02-03	Sabino Cyn, phoneline trail	JES-05-320	242	15	lineation stretch shape mylonitic Description				2161
JES-05-322	JES-05-322	32.3265	-110.797	3.57665e+06	519150		12N	3576452	519211	2005-02-03	Sabino Cyn, phoneline trail	JES-05-322	82	20	Composite foliation gneissic mylonitic foliation Description				2124
JES-05-323	JES-05-323	32.3257	-110.798	3.57656e+06	518995		12N	3576363	519056	2005-02-03	Sabino Cyn, phoneline trail	JES-05-323	127	8	Composite foliation gneissic mylonitic foliation Description				2124
JES-05-323	JES-05-323	32.3257	-110.798	3.57656e+06	518995		12N	3576363	519056	2005-02-03	Sabino Cyn, phoneline trail	JES-05-323	249	12	lineation stretch shape mylonitic Description				2149
JES-05-324	JES-05-324	32.3255	-110.799	3.57654e+06	518904		12N	3576339	518965	2005-02-03	Sabino Cyn, phoneline trail	JES-05-324	110	26	Composite foliation gneissic mylonitic foliation Description				2124
JES-05-324	JES-05-324	32.3255	-110.799	3.57654e+06	518904		12N	3576339	518965	2005-02-03	Sabino Cyn, phoneline trail	JES-05-324	246	18	lineation mylonitic stretch shape directed Description		SW		4042
JES-05-325	JES-05-325	32.325	-110.8	3.57648e+06	518861		12N	3576286	518922	2005-02-03	Sabino Cyn, phoneline trail	JES-05-325	240	11	lineation stretch shape mylonitic Description				2161
JES-05-326	JES-05-326	32.323	-110.804	3.57626e+06	518450		12N	3576061	518511	2005-02-03	Sabino Cyn, phoneline trail	JES-05-326	195	10	Composite foliation gneissic mylonitic foliation Description				2124
JES-05-326	JES-05-326	32.323	-110.804	3.57626e+06	518450		12N	3576061	518511	2005-02-03	Sabino Cyn, phoneline trail	JES-05-326	243	8	lineation stretch shape mylonitic Description				2149
JES-05-327	JES-05-327	32.3215	-110.807	3.57609e+06	518208		12N	3575894	518269	2005-02-03	Sabino Cyn, phoneline trail	JES-05-327	122	17	Composite foliation gneissic mylonitic foliation Description				2124
JES-05-327	JES-05-327	32.3215	-110.807	3.57609e+06	518208		12N	3575894	518269	2005-02-03	Sabino Cyn, phoneline trail	JES-05-327	243	14	lineation mylonitic stretch shape directed Description		SW		4042
JES-05-328	JES-05-328	32.3218	-110.806	3.57613e+06	518278		12N	3575930	518339	2005-02-03	Sabino Cyn, phoneline trail	JES-05-328	127	16	Composite foliation gneissic mylonitic foliation Description				2124
JES-05-328	JES-05-328	32.3218	-110.806	3.57613e+06	518278		12N	3575930	518339	2005-02-03	Sabino Cyn, phoneline trail	JES-05-328	251	10	lineation stretch shape mylonitic Description				2149
JES-05-329	JES-05-329	32.3207	-110.807	3.576e+06	518182		12N	3575801	518243	2005-02-03	Sabino Cyn, phoneline trail	JES-05-329	303	24	Composite foliation gneissic mylonitic foliation Description				2124
JES-05-329	JES-05-329	32.3207	-110.807	3.576e+06	518182		12N	3575801	518243	2005-02-03	Sabino Cyn, phoneline trail	JES-05-329	240	18	lineation stretch shape mylonitic Description		SW		2149
JES-05-330	JES-05-330	32.3196	-110.806	3.57588e+06	518214		12N	3575682	518275	2005-02-03	Sabino Cyn, phoneline trail	JES-05-330	250	7	lineation mylonitic stretch shape directed Description				4039
JES-05-331	JES-05-331	32.3185	-110.806	3.57576e+06	518223		12N	3575559	518284	2005-02-03	Sabino Cyn, phoneline trail	JES-05-331	242	6	lineation stretch shape mylonitic Description				2161
JES-05-332	JES-05-332	32.3177	-110.809	3.57566e+06	517997		12N	3575467	518058	2005-02-03	Sabino Cyn, phoneline trail	JES-05-332	245	13	lineation stretch shape mylonitic Description				2161
JES-05-333	JES-05-333	32.3176	-110.808	3.57565e+06	518040		12N	3575456	518101	2005-02-03	Sabino Cyn, phoneline trail	JES-05-333	165	18	Composite foliation gneissic mylonitic foliation Description				2124
JES-05-334	JES-05-334	32.317	-110.808	3.57559e+06	518072		12N	3575393	518133	2005-02-03	Sabino Cyn, phoneline trail	JES-05-334	172	16	Composite foliation gneissic mylonitic foliation Description				2124
JES-05-334	JES-05-334	32.317	-110.808	3.57559e+06	518072		12N	3575393	518133	2005-02-03	Sabino Cyn, phoneline trail	JES-05-334	247	16	lineation stretch shape mylonitic Description				2149
JES-05-335	JES-05-335	32.3157	-110.808	3.57544e+06	518040		12N	3575246	518101	2005-02-03	Sabino Cyn, phoneline trail	JES-05-335	158	13	Composite foliation gneissic mylonitic foliation Description				2124
JES-05-335	JES-05-335	32.3157	-110.808	3.57544e+06	518040		12N	3575246	518101	2005-02-03	Sabino Cyn, phoneline trail	JES-05-335	249	13	lineation stretch shape mylonitic Description				2149
JES-05-336	JES-05-336	32.3146	-110.809	3.57532e+06	518013		12N	3575127	518074	2005-02-03	Sabino Cyn, phoneline trail	JES-05-336	247	18	lineation stretch shape mylonitic Description				2161
JES-05-337	JES-05-337	32.3131	-110.809	3.57515e+06	518006		12N	3574956	518067	2005-02-03	Sabino Cyn, phoneline trail	JES-05-337	162	10	Composite foliation gneissic mylonitic foliation Description				2124
JES-05-337	JES-05-337	32.3131	-110.809	3.57515e+06	518006		12N	3574956	518067	2005-02-03	Sabino Cyn, phoneline trail	JES-05-337	248	10	lineation stretch shape mylonitic Description				2149
JES-05-338	JES-05-338	32.312	-110.808	3.57503e+06	518031		12N	3574833	518092	2005-02-03	Sabino Cyn, phoneline trail	JES-05-338	153	18	Composite foliation gneissic mylonitic foliation Description				2124
JES-05-338	JES-05-338	32.312	-110.808	3.57503e+06	518031		12N	3574833	518092	2005-02-03	Sabino Cyn, phoneline trail	JES-05-338	242	18	lineation stretch shape mylonitic Description				2149
JES-05-339	JES-05-339	32.3112	-110.81	3.57495e+06	517906		12N	3574754	517967	2005-02-03	Sabino Cyn, phoneline trail	JES-05-339	162	12	Composite foliation gneissic mylonitic foliation Description				2124
JES-05-339	JES-05-339	32.3112	-110.81	3.57495e+06	517906		12N	3574754	517967	2005-02-03	Sabino Cyn, phoneline trail	JES-05-339	244	12	lineation stretch shape mylonitic Description				2149
JES-05-340	JES-05-340	32.3114	-110.811	3.57496e+06	517787		12N	3574767	517848	2005-02-03	Sabino Cyn, phoneline trail	JES-05-340	158	21	Composite foliation gneissic mylonitic foliation Description				2124
JES-05-340	JES-05-340	32.3114	-110.811	3.57496e+06	517787		12N	3574767	517848	2005-02-03	Sabino Cyn, phoneline trail	JES-05-340	246	20	lineation stretch shape mylonitic Description				2149
JES-05-341	JES-05-341	32.3107	-110.812	3.57489e+06	517686		12N	3574691	517747	2005-02-03	Sabino Cyn, phoneline trail	JES-05-341	138	24	Composite foliation gneissic mylonitic foliation Description				2124
JES-05-342	JES-05-342	32.3091	-110.813	3.57471e+06	517559		12N	3574514	517620	2005-02-03	Sabino Cyn, phoneline trail	JES-05-342	125	19	Composite foliation gneissic mylonitic foliation Description				2124
JES-05-342	JES-05-342	32.3091	-110.813	3.57471e+06	517559		12N	3574514	517620	2005-02-03	Sabino Cyn, phoneline trail	JES-05-342	250	17	lineation stretch shape mylonitic Description				2149
JES-05-347	JES-05-347	32.3106	-110.817	3.57488e+06	517232		12N	3574681	517293	2005-02-03	Sabino Cyn, phoneline trail	JES-05-347	171	16	Composite foliation gneissic mylonitic foliation Description				2124
JES-05-347	JES-05-347	32.3106	-110.817	3.57488e+06	517232		12N	3574681	517293	2005-02-03	Sabino Cyn, phoneline trail	JES-05-347	254	16	lineation stretch shape mylonitic Description				2149
JES-05-350	JES-05-350	32.3121	-110.819	3.57505e+06	517085		12N	3574851	517146	2005-02-03	Sabino Cyn, phoneline trail	JES-05-350	160	18	Composite foliation gneissic mylonitic foliation Description				2124
JES-05-350	JES-05-350	32.3121	-110.819	3.57505e+06	517085		12N	3574851	517146	2005-02-03	Sabino Cyn, phoneline trail	JES-05-350	257	18	lineation stretch shape mylonitic Description				2149
JES-05-352	JES-05-352	32.3128	-110.818	3.57513e+06	517103		12N	3574930	517164	2005-02-03	Sabino Cyn, phoneline trail	JES-05-352	150	18	Composite foliation gneissic mylonitic foliation Description				2124
JES-05-352	JES-05-352	32.3128	-110.818	3.57513e+06	517103		12N	3574930	517164	2005-02-03	Sabino Cyn, phoneline trail	JES-05-352	251	18	lineation stretch shape mylonitic Description				2149
JES-05-457	JES-05-457	32.327	-110.81	3.5767e+06	517920		12N	3576503	517981	2005-02-27	Sabino Cyn, west side	JES-05-457	54	19	Composite foliation gneissic mylonitic foliation Description				2124
JES-05-457	JES-05-457	32.327	-110.81	3.5767e+06	517920		12N	3576503	517981	2005-02-27	Sabino Cyn, west side	JES-05-457	245	9	lineation stretch shape mylonitic Description				2149
JES-05-458	JES-05-458	32.3281	-110.807	3.57682e+06	518132		12N	3576618	518193	2005-02-27	Sabino Cyn, west side	JES-05-458	96	20	Composite foliation gneissic mylonitic foliation Description				2124
JES-05-458	JES-05-458	32.3281	-110.807	3.57682e+06	518132		12N	3576618	518193	2005-02-27	Sabino Cyn, west side	JES-05-458	247	9	lineation stretch shape mylonitic Description				2149
JES-05-459	JES-05-459	32.3293	-110.805	3.57696e+06	518339		12N	3576760	518400	2005-02-27	Sabino Cyn, west side	JES-05-459	250	19	lineation stretch shape mylonitic Description				2161
JES-05-460	JES-05-460	32.3295	-110.805	3.57697e+06	518380		12N	3576775	518441	2005-02-27	Sabino Cyn, west side	JES-05-460	119	15	Composite foliation gneissic mylonitic foliation Description				2124
JES-05-460	JES-05-460	32.3295	-110.805	3.57697e+06	518380		12N	3576775	518441	2005-02-27	Sabino Cyn, west side	JES-05-460	243	10	lineation stretch shape mylonitic Description				2149
JES-05-461	JES-05-461	32.3304	-110.803	3.57707e+06	518501		12N	3576874	518562	2005-02-27	Sabino Cyn, west side	JES-05-461	243	12	lineation stretch shape mylonitic Description				2161
JES-05-462	JES-05-462	32.3309	-110.802	3.57713e+06	518660		12N	3576937	518721	2005-02-27	Sabino Cyn, west side	JES-05-462	196	16	Composite foliation gneissic mylonitic foliation Description				2124
JES-05-462	JES-05-462	32.3309	-110.802	3.57713e+06	518660		12N	3576937	518721	2005-02-27	Sabino Cyn, west side	JES-05-462	241	10	lineation stretch shape mylonitic Description				2149
JES-05-463	JES-05-463	32.3314	-110.801	3.57718e+06	518719		12N	3576985	518780	2005-02-27	Sabino Cyn, west side	JES-05-463	245	9	lineation mylonitic stretch shape directed Description		SW		4039
JES-05-464	JES-05-464	32.3323	-110.8	3.57729e+06	518792		12N	3577089	518853	2005-02-27	Sabino Cyn, west side	JES-05-464	192	20	Composite foliation gneissic mylonitic foliation Description				2124
JES-05-464	JES-05-464	32.3323	-110.8	3.57729e+06	518792		12N	3577089	518853	2005-02-27	Sabino Cyn, west side	JES-05-464	244	18	lineation stretch shape mylonitic Description				2149
JES-05-466	JES-05-466	32.3251	-110.811	3.57649e+06	517756		12N	3576291	517817	2005-02-27	Sabino Cyn, west side	JES-05-466	129	18	Composite foliation gneissic mylonitic foliation Description				2124
JES-05-466	JES-05-466	32.3251	-110.811	3.57649e+06	517756		12N	3576291	517817	2005-02-27	Sabino Cyn, west side	JES-05-466	238	17	lineation stretch shape mylonitic Description				2149
JES-05-467	JES-05-467	32.3235	-110.814	3.5763e+06	517544		12N	3576107	517605	2005-02-27	Sabino Cyn, west side	JES-05-467	140	22	Composite foliation gneissic mylonitic foliation Description				2124
JES-05-467	JES-05-467	32.3235	-110.814	3.5763e+06	517544		12N	3576107	517605	2005-02-27	Sabino Cyn, west side	JES-05-467	245	22	lineation stretch shape mylonitic Description				2149
JES-05-468	JES-05-468	32.3224	-110.814	3.57619e+06	517552		12N	3575994	517613	2005-02-27	Sabino Cyn, west side	JES-05-468	164	22	Composite foliation gneissic mylonitic foliation Description				2124
JES-05-468	JES-05-468	32.3224	-110.814	3.57619e+06	517552		12N	3575994	517613	2005-02-27	Sabino Cyn, west side	JES-05-468	250	22	lineation stretch shape mylonitic Description				2149
JES-05-469	JES-05-469	32.3197	-110.813	3.57589e+06	517629		12N	3575696	517690	2005-02-27	Sabino Cyn, west side	JES-05-469	162	12	Composite foliation gneissic mylonitic foliation Description				2124
JES-05-469	JES-05-469	32.3197	-110.813	3.57589e+06	517629		12N	3575696	517690	2005-02-27	Sabino Cyn, west side	JES-05-469	249	12	lineation stretch shape mylonitic Description				2149
JES-05-470	JES-05-470	32.3183	-110.814	3.57574e+06	517491		12N	3575539	517552	2005-02-27	Sabino Cyn, west side	JES-05-470	151	11	Composite foliation gneissic mylonitic foliation Description				2124
JES-05-470	JES-05-470	32.3183	-110.814	3.57574e+06	517491		12N	3575539	517552	2005-02-27	Sabino Cyn, west side	JES-05-470	251	11	lineation stretch shape mylonitic Description				2149
JES-05-471	JES-05-471	32.3173	-110.817	3.57563e+06	517263		12N	3575428	517324	2005-02-27	Sabino Cyn, west side	JES-05-471	158	11	Composite foliation gneissic mylonitic foliation Description				2124
JES-05-471	JES-05-471	32.3173	-110.817	3.57563e+06	517263		12N	3575428	517324	2005-02-27	Sabino Cyn, west side	JES-05-471	256	11	lineation stretch shape mylonitic Description				2149
JES-05-472	JES-05-472	32.3166	-110.818	3.57554e+06	517152		12N	3575347	517213	2005-02-27	Sabino Cyn, west side	JES-05-472	149	17	Composite foliation gneissic mylonitic foliation Description				2124
JES-05-472	JES-05-472	32.3166	-110.818	3.57554e+06	517152		12N	3575347	517213	2005-02-27	Sabino Cyn, west side	JES-05-472	255	17	lineation stretch shape mylonitic Description				2149
JES-05-473	JES-05-473	32.3165	-110.818	3.57553e+06	517114		12N	3575336	517175	2005-02-27	Sabino Cyn, west side	JES-05-473	247	9	lineation stretch shape mylonitic Description				2161
JES-05-474	JES-05-474	32.3162	-110.819	3.5755e+06	517035		12N	3575304	517096	2005-02-27	Sabino Cyn, west side	JES-05-474	156	14	Composite foliation gneissic mylonitic foliation Description				2124
JES-05-474	JES-05-474	32.3162	-110.819	3.5755e+06	517035		12N	3575304	517096	2005-02-27	Sabino Cyn, west side	JES-05-474	251	14	lineation stretch shape mylonitic Description				2149
JES-05-475	JES-05-475	32.3073	-110.81	3.57452e+06	517859		12N	3574320	517920	2005-03-04	Sabino Cyn, east side (Blackett)	JES-05-475	119	22	Composite foliation gneissic mylonitic foliation Description				2124
JES-05-475	JES-05-475	32.3073	-110.81	3.57452e+06	517859		12N	3574320	517920	2005-03-04	Sabino Cyn, east side (Blackett)	JES-05-475	249	12	lineation stretch shape mylonitic Description				2149
JES-05-476	JES-05-476	32.3078	-110.811	3.57457e+06	517830		12N	3574376	517891	2005-03-04	Sabino Cyn, east side (Blackett)	JES-05-476	129	22	Composite foliation gneissic mylonitic foliation Description				2124
JES-05-476	JES-05-476	32.3078	-110.811	3.57457e+06	517830		12N	3574376	517891	2005-03-04	Sabino Cyn, east side (Blackett)	JES-05-476	251	20	lineation stretch shape mylonitic Description				2149
JES-05-478	JES-05-478	32.3181	-110.807	3.57571e+06	518147		12N	3575511	518208	2005-03-04	Sabino Cyn, east side (Blackett)	JES-05-478	248	11	lineation stretch shape mylonitic Description				2161
JES-05-479	JES-05-479	32.3176	-110.806	3.57565e+06	518261		12N	3575456	518322	2005-03-04	Sabino Cyn, east side (Blackett)	JES-05-479	249	12	lineation stretch shape mylonitic Description				2161
JES-05-480	JES-05-480	32.3181	-110.806	3.57572e+06	518296		12N	3575519	518357	2005-03-04	Sabino Cyn, east side (Blackett)	JES-05-480	250	18	lineation stretch shape mylonitic Description				2161
JES-05-481	JES-05-481	32.3187	-110.804	3.57578e+06	518407		12N	3575578	518468	2005-03-04	Sabino Cyn, east side (Blackett)	JES-05-481	249	18	lineation stretch shape mylonitic Description				2161
JES-05-482	JES-05-482	32.3197	-110.804	3.57589e+06	518446		12N	3575693	518507	2005-03-04	Sabino Cyn, east side (Blackett)	JES-05-482	247	17	lineation stretch shape mylonitic Description				2161
JES-05-483	JES-05-483	32.3213	-110.803	3.57606e+06	518528		12N	3575865	518589	2005-03-04	Sabino Cyn, east side (Blackett)	JES-05-483	253	14	lineation stretch shape mylonitic Description				2161
JES-05-484	JES-05-484	32.3215	-110.802	3.57609e+06	518609		12N	3575890	518670	2005-03-04	Sabino Cyn, east side (Blackett)	JES-05-484	250	13	lineation stretch shape mylonitic Description				2161
JES-05-485	JES-05-485	32.3217	-110.802	3.57611e+06	518670		12N	3575915	518731	2005-03-04	Sabino Cyn, east side (Blackett)	JES-05-485	156	15	Composite foliation gneissic mylonitic foliation Description				2124
JES-05-485	JES-05-485	32.3217	-110.802	3.57611e+06	518670		12N	3575915	518731	2005-03-04	Sabino Cyn, east side (Blackett)	JES-05-485	248	15	lineation stretch shape mylonitic Description				2149
JES-05-486	JES-05-486	32.3223	-110.801	3.57618e+06	518749		12N	3575982	518810	2005-03-04	Sabino Cyn, east side (Blackett)	JES-05-486	162	17	Composite foliation gneissic mylonitic foliation Description				2124
JES-05-486	JES-05-486	32.3223	-110.801	3.57618e+06	518749		12N	3575982	518810	2005-03-04	Sabino Cyn, east side (Blackett)	JES-05-486	247	17	lineation stretch shape mylonitic Description				2149
JES-05-487	JES-05-487	32.3238	-110.797	3.57635e+06	519081		12N	3576149	519142	2005-03-04	Sabino Cyn, east side (Blackett)	JES-05-487	251	19	lineation stretch shape mylonitic Description				2161
JES-05-488	JES-05-488	32.3243	-110.796	3.5764e+06	519239		12N	3576202	519300	2005-03-04	Sabino Cyn, east side (Blackett)	JES-05-488	133	10	Composite foliation gneissic mylonitic foliation Description				2124
JES-05-488	JES-05-488	32.3243	-110.796	3.5764e+06	519239		12N	3576202	519300	2005-03-04	Sabino Cyn, east side (Blackett)	JES-05-488	247	9	lineation stretch shape mylonitic Description				2149
JES-05-489	JES-05-489	32.3244	-110.793	3.57642e+06	519450		12N	3576219	519511	2005-03-04	Sabino Cyn, east side (Blackett)	JES-05-489	170	11	Composite foliation gneissic mylonitic foliation Description				2124
JES-05-489	JES-05-489	32.3244	-110.793	3.57642e+06	519450		12N	3576219	519511	2005-03-04	Sabino Cyn, east side (Blackett)	JES-05-489	251	11	lineation stretch shape mylonitic Description				2149
JES-05-490	JES-05-490	32.3248	-110.793	3.57646e+06	519529		12N	3576264	519590	2005-03-04	Sabino Cyn, east side (Blackett)	JES-05-490	250	10	lineation stretch shape mylonitic Description				2161
JES-05-491	JES-05-491	32.3254	-110.791	3.57653e+06	519680		12N	3576330	519741	2005-03-04	Sabino Cyn, east side (Blackett)	JES-05-491	248	12	lineation stretch shape mylonitic Description				2161
JES-05-581		32.3444	-110.78	3.57863e+06	520730		12N	3578431	520791	2005-03-18	Sabino Cyn, upper	JES-05-581	46	7	mylonitic lineation		NE
JES-05-581		32.3444	-110.78	3.57863e+06	520730		12N	3578431	520791	2005-03-18	Sabino Cyn, upper	JES-05-581	244	22	mylonitic foliation
JES-05-582		32.3491	-110.78	3.57915e+06	520722		12N	3578951	520783	2005-03-18	Sabino Cyn, upper	JES-05-582	233	0	mylonitic lineation
JES-05-582		32.3491	-110.78	3.57915e+06	520722		12N	3578951	520783	2005-03-18	Sabino Cyn, upper	JES-05-582	233	22	mylonitic foliation
JES-05-583		32.3511	-110.779	3.57937e+06	520827		12N	3579177	520888	2005-03-18	Sabino Cyn, upper	JES-05-583	63	2	mylonitic lineation
JES-05-583		32.3511	-110.779	3.57937e+06	520827		12N	3579177	520888	2005-03-18	Sabino Cyn, upper	JES-05-583	245	32	mylonitic foliation
JES-05-584		32.3553	-110.775	3.57984e+06	521124		12N	3579640	521185	2005-03-18	Sabino Cyn, upper	JES-05-584	51	12	mylonitic lineation
JES-05-584		32.3553	-110.775	3.57984e+06	521124		12N	3579640	521185	2005-03-18	Sabino Cyn, upper	JES-05-584	8	24	mylonitic foliation
JES-05-666	JES-05-666	32.3707	-110.712	3.58156e+06	527122		12N	3581363	527183	2005-04-29	Windy Point	JES-05-666	40	7	mylonitic lineation	trend and plunge		Windy Point
JES-05-667	JES-05-667	32.3707	-110.712	3.58157e+06	527090		12N	3581368	527151	2005-04-29	Windy Point	JES-05-667	40	5	mylonitic lineation	trend and plunge		Windy Point
JES-05-668	JES-05-668	32.3697	-110.713	3.58145e+06	526958		12N	3581251	527019	2005-04-29	Windy Point	JES-05-668	43	2	mylonitic lineation	trend and plunge		Windy Point
JES-05-669	JES-05-669	32.3697	-110.714	3.58146e+06	526928		12N	3581258	526989	2005-04-29	Windy Point	JES-05-669	44	8	mylonitic lineation	trend and plunge		Windy Point
JES-05-670	JES-05-670	32.3693	-110.714	3.58141e+06	526861		12N	3581215	526922	2005-04-29	Windy Point	JES-05-670	43	1	mylonitic lineation	trend and plunge	SW	Windy Point
JES-05-671	JES-05-671	32.3686	-110.714	3.58133e+06	526897		12N	3581137	526958	2005-04-29	Windy Point	JES-05-671	38	2	mylonitic lineation	trend and plunge		Windy Point
JES-05-672	JES-05-672	32.3682	-110.715	3.58128e+06	526777		12N	3581083	526838	2005-04-29	Windy Point	JES-05-672	43	2	mylonitic lineation	trend and plunge		Windy Point
JES-05-673	JES-05-673	32.3684	-110.716	3.58131e+06	526749		12N	3581112	526810	2005-04-29	Windy Point	JES-05-673	44	2	mylonitic lineation	trend and plunge	SW	Windy Point
JES-05-674	JES-05-674	32.3686	-110.716	3.58133e+06	526734		12N	3581133	526795	2005-04-29	Windy Point	JES-05-674	44	4	mylonitic lineation	trend and plunge		Windy Point
JES-05-676	JES-05-676	32.3728	-110.71	3.58179e+06	527318		12N	3581594	527379	2005-04-29	Windy Point	JES-05-676	45	3	mylonitic lineation	trend and plunge		Windy Point
JES-05-677	JES-05-677	32.3733	-110.709	3.58185e+06	527346		12N	3581654	527407	2005-04-29	Windy Point	JES-05-677	42	6	mylonitic lineation	trend and plunge		Windy Point
JES-05-677	JES-05-677	32.3733	-110.709	3.58185e+06	527346		12N	3581654	527407	2005-04-29	Windy Point	JES-05-677	16	10	mylonitic foliation			Windy Point
JES-06-467		32.3312	-110.675	3.57719e+06	530619	NAD83	12N			2006-04-15	E Molino Basin (W Spr Cyn)	JES-06-467	40	14	mylonitic lineation, down-dip arrow	trend and plunge	NE	Molino-Soldier
JES-06-468		32.3315	-110.674	3.57723e+06	530685	NAD83	12N			2006-04-15	E Molino Basin (W Spr Cyn)	JES-06-468	49	20	mylonitic lineation	trend and plunge		Molino-Soldier
JES-06-469		32.3317	-110.673	3.57725e+06	530758	NAD83	12N			2006-04-15	E Molino Basin (W Spr Cyn)	JES-06-469	348	17	mylonitic foliation			Molino-Soldier
JES-06-469		32.3317	-110.673	3.57725e+06	530758	NAD83	12N			2006-04-15	E Molino Basin (W Spr Cyn)	JES-06-469	48	12	mylonitic lineation, down-dip arrow	trend and plunge	NE	Molino-Soldier
JES-06-470		32.332	-110.672	3.57728e+06	530829	NAD83	12N			2006-04-15	E Molino Basin (W Spr Cyn)	JES-06-470	39	14	mylonitic lineation, down-dip arrow	trend and plunge	NE	Molino-Soldier
JES-06-471		32.3325	-110.672	3.57733e+06	530861	NAD83	12N			2006-04-15	E Molino Basin (W Spr Cyn)	JES-06-471	39	19	mylonitic lineation	trend and plunge		Molino-Soldier
JES-06-472		32.3334	-110.671	3.57744e+06	530953	NAD83	12N			2006-04-15	E Molino Basin (W Spr Cyn)	JES-06-472	38	16	mylonitic lineation	trend and plunge		Molino-Soldier
JES-06-473		32.3347	-110.67	3.57758e+06	531022	NAD83	12N			2006-04-15	E Molino Basin (W Spr Cyn)	JES-06-473	335	20	mylonitic foliation			Molino-Soldier
JES-06-473		32.3347	-110.67	3.57758e+06	531022	NAD83	12N			2006-04-15	E Molino Basin (W Spr Cyn)	JES-06-473	41	19	mylonitic lineation, down-dip arrow	trend and plunge	NE	Molino-Soldier
JES-06-474		32.3356	-110.669	3.57768e+06	531106	NAD83	12N			2006-04-15	E Molino Basin (W Spr Cyn)	JES-06-474	36	12	mylonitic lineation, down-dip arrow	trend and plunge	NE	Molino-Soldier
JES-06-475		32.3367	-110.669	3.57781e+06	531128	NAD83	12N			2006-04-15	E Molino Basin (W Spr Cyn)	JES-06-475	38	23	mylonitic lineation	trend and plunge		Molino-Soldier
JES-06-476		32.3386	-110.667	3.57802e+06	531296	NAD83	12N			2006-04-15	E Molino Basin (W Spr Cyn)	JES-06-476	33	12	mylonitic lineation	trend and plunge		Molino-Soldier
JES-06-477		32.339	-110.667	3.57806e+06	531323	NAD83	12N			2006-04-15	E Molino Basin (W Spr Cyn)	JES-06-477	31	19	mylonitic lineation	trend and plunge		Molino-Soldier
JES-06-478		32.3394	-110.667	3.57811e+06	531349	NAD83	12N			2006-04-15	E Molino Basin (W Spr Cyn)	JES-06-478	341	17	mylonitic foliation			Molino-Soldier
JES-06-478		32.3394	-110.667	3.57811e+06	531349	NAD83	12N			2006-04-15	E Molino Basin (W Spr Cyn)	JES-06-478	27	14	mylonitic lineation	trend and plunge		Molino-Soldier
JES-06-479		32.3399	-110.667	3.57816e+06	531368	NAD83	12N			2006-04-15	E Molino Basin (W Spr Cyn)	JES-06-479	34	18	mylonitic lineation	trend and plunge		Molino-Soldier
JES-06-480		32.3402	-110.666	3.5782e+06	531474	NAD83	12N			2006-04-24	E Molino Basin (W Spr Cyn)	JES-06-480	352	20	mylonitic foliation			Molino-Soldier
JES-06-480		32.3402	-110.666	3.5782e+06	531474	NAD83	12N			2006-04-24	E Molino Basin (W Spr Cyn)	JES-06-480	38	16	mylonitic lineation	trend and plunge		Molino-Soldier
JES-06-481		32.3404	-110.665	3.57822e+06	531527	NAD83	12N			2006-04-24	E Molino Basin (W Spr Cyn)	JES-06-481	27	9	mylonitic lineation	trend and plunge		Molino-Soldier
JES-06-482		32.3407	-110.665	3.57825e+06	531567	NAD83	12N			2006-04-24	E Molino Basin (W Spr Cyn)	JES-06-482	31	10	mylonitic lineation	trend and plunge		Molino-Soldier
JES-06-483		32.3415	-110.664	3.57834e+06	531637	NAD83	12N			2006-04-24	E Molino Basin (W Spr Cyn)	JES-06-483	31	4	mylonitic lineation	trend and plunge		Molino-Soldier
JES-06-484		32.3422	-110.663	3.57842e+06	531746	NAD83	12N			2006-04-24	E Molino Basin (W Spr Cyn)	JES-06-484	27	4	mylonitic lineation	trend and plunge		Molino-Soldier
JES-06-485		32.3427	-110.662	3.57847e+06	531774	NAD83	12N			2006-04-24	E Molino Basin (W Spr Cyn)	JES-06-485	50	19	mylonitic foliation			Molino-Soldier
JES-06-485		32.3427	-110.662	3.57847e+06	531774	NAD83	12N			2006-04-24	E Molino Basin (W Spr Cyn)	JES-06-485	29	3	mylonitic lineation	trend and plunge		Molino-Soldier
JES-06-486		32.3432	-110.662	3.57853e+06	531825	NAD83	12N			2006-04-24	E Molino Basin (W Spr Cyn)	JES-06-486	26	13	mylonitic lineation	trend and plunge		Molino-Soldier
JES-06-487		32.3437	-110.661	3.57858e+06	531894	NAD83	12N			2006-04-24	E Molino Basin (W Spr Cyn)	JES-06-487	29	8	mylonitic lineation	trend and plunge		Molino-Soldier
JES-06-488		32.3429	-110.658	3.57849e+06	532159	NAD83	12N			2006-04-24	E Molino Basin (W Spr Cyn)	JES-06-488	211	2	mylonitic lineation	trend and plunge		Molino-Soldier
JES-06-489		32.3426	-110.658	3.57846e+06	532182	NAD83	12N			2006-04-24	E Molino Basin (W Spr Cyn)	JES-06-489	45	21	mylonitic foliation			Molino-Soldier
JES-06-489		32.3426	-110.658	3.57846e+06	532182	NAD83	12N			2006-04-24	E Molino Basin (W Spr Cyn)	JES-06-489	212	5	mylonitic lineation	trend and plunge		Molino-Soldier
JES-06-490		32.3424	-110.658	3.57844e+06	532181	NAD83	12N			2006-04-24	E Molino Basin (W Spr Cyn)	JES-06-490	208	5	mylonitic lineation	trend and plunge		Molino-Soldier
JES-06-491		32.342	-110.657	3.57839e+06	532287	NAD83	12N			2006-04-24	E Molino Basin (W Spr Cyn)	JES-06-491	27	12	mylonitic lineation	trend and plunge		Molino-Soldier
JES-06-492		32.3417	-110.656	3.57836e+06	532348	NAD83	12N			2006-04-24	E Molino Basin (W Spr Cyn)	JES-06-492	6	14	mylonitic foliation			Molino-Soldier
JES-06-492		32.3417	-110.656	3.57836e+06	532348	NAD83	12N			2006-04-24	E Molino Basin (W Spr Cyn)	JES-06-492	28	7	mylonitic lineation	trend and plunge		Molino-Soldier
JES-06-493		32.3429	-110.655	3.5785e+06	532447	NAD83	12N			2006-04-24	E Molino Basin (W Spr Cyn)	JES-06-493	29	7	mylonitic lineation	trend and plunge		Molino-Soldier
JES-06-494		32.3442	-110.654	3.57864e+06	532538	NAD83	12N			2006-04-24	E Molino Basin (W Spr Cyn)	JES-06-494	33	9	mylonitic lineation	trend and plunge		Molino-Soldier
JES-06-495		32.3445	-110.654	3.57868e+06	532514	NAD83	12N			2006-04-24	E Molino Basin (W Spr Cyn)	JES-06-495	15	20	mylonitic foliation			Molino-Soldier
JES-06-495		32.3445	-110.654	3.57868e+06	532514	NAD83	12N			2006-04-24	E Molino Basin (W Spr Cyn)	JES-06-495	26	14	mylonitic lineation	trend and plunge		Molino-Soldier
JES-06-496		32.3454	-110.653	3.57877e+06	532642	NAD83	12N			2006-04-24	E Molino Basin (W Spr Cyn)	JES-06-496	31	12	mylonitic lineation	trend and plunge		Molino-Soldier
JES-06-497		32.3463	-110.656	3.57888e+06	532372	NAD83	12N			2006-04-24	E Molino Basin (W Spr Cyn)	JES-06-497	10	22	mylonitic foliation			Molino-Soldier
JES-06-497		32.3463	-110.656	3.57888e+06	532372	NAD83	12N			2006-04-24	E Molino Basin (W Spr Cyn)	JES-06-497	30	4	mylonitic lineation	trend and plunge		Molino-Soldier
JES-07-001		32.3824	-110.719	3.58286e+06	526461	NAD83	12N			2006-07-01	Rose Peak area	JES-07-001	230	8	mylonitic lineation	trend and plunge		Windy Point
JES-07-002		32.3819	-110.719	3.5828e+06	526445	NAD83	12N			2006-07-01	Rose Peak area	JES-07-002	44	4	mylonitic lineation	trend and plunge		Windy Point
JES-07-003		32.3816	-110.719	3.58277e+06	526420	NAD83	12N			2006-07-01	Rose Peak area	JES-07-003	49	18	mylonitic lineation	trend and plunge		Windy Point
JES-07-004		32.3813	-110.72	3.58273e+06	526381	NAD83	12N			2006-07-01	Rose Peak area	JES-07-004	223	5	mylonitic lineation	trend and plunge		Windy Point
JES-07-005		32.3819	-110.72	3.5828e+06	526325	NAD83	12N			2006-07-01	Rose Peak area	JES-07-005	41	4	mylonitic lineation	trend and plunge		Windy Point
JES-08-001		32.3982	-110.688	3.58462e+06	529368	NAD83	12N			2007-08-26	Green Mtn trail	JES-08-001	33	3	mylonitic lineation	trend and plunge		Windy Point
JES-08-002		32.3978	-110.687	3.58458e+06	529412	NAD83	12N			2007-08-26	Green Mtn trail	JES-08-002	24	1	mylonitic lineation	trend and plunge		Windy Point
JES-08-003		32.3973	-110.687	3.58452e+06	529438	NAD83	12N			2007-08-26	Green Mtn trail	JES-08-003	192	12	mylonitic lineation	trend and plunge		Windy Point
JES-08-004		32.3972	-110.687	3.58451e+06	529473	NAD83	12N			2007-08-26	Green Mtn trail	JES-08-004	24	6	mylonitic lineation	trend and plunge		Windy Point
JES-08-005		32.4056	-110.699	3.58543e+06	528327	NAD83	12N			2007-09-02	Barnum Rock area	JES-08-005	279	33	mylonitic foliation			Windy Point
JES-08-005		32.4056	-110.699	3.58543e+06	528327	NAD83	12N			2007-09-02	Barnum Rock area	JES-08-005	37	33	mylonitic lineation	trend and plunge		Windy Point
JES-08-006		32.4029	-110.698	3.58514e+06	528395	NAD83	12N			2007-09-02	Barnum Rock area	JES-08-006	27	18	mylonitic lineation	trend and plunge		Windy Point
JES-08-007		32.4022	-110.699	3.58506e+06	528329	NAD83	12N			2007-09-02	Barnum Rock area	JES-08-007	312	24	mylonitic foliation			Windy Point
JES-08-007		32.4022	-110.699	3.58506e+06	528329	NAD83	12N			2007-09-02	Barnum Rock area	JES-08-007	33	17	mylonitic lineation	trend and plunge		Windy Point
JES-08-008		32.4033	-110.697	3.58518e+06	528534	NAD83	12N			2007-09-02	Barnum Rock area	JES-08-008	27	8	mylonitic lineation	trend and plunge		Windy Point
JES-08-009		32.4074	-110.697	3.58564e+06	528451	NAD83	12N			2007-09-02	Barnum Rock area	JES-08-009	30	17	mylonitic lineation	trend and plunge		Windy Point
JES-08-010		32.4082	-110.697	3.58572e+06	528512	NAD83	12N			2007-09-02	Barnum Rock area	JES-08-010	215	4	mylonitic lineation	trend and plunge		Windy Point
JES-08-011		32.4088	-110.698	3.58579e+06	528445	NAD83	12N			2007-09-02	Barnum Rock area	JES-08-011	29	2	mylonitic lineation	trend and plunge		Windy Point
JES-08-012		32.4089	-110.699	3.5858e+06	528277	NAD83	12N			2007-09-02	Barnum Rock area	JES-08-012	37	8	mylonitic lineation	trend and plunge		Windy Point
JES-08-395		32.409	-110.7	3.58581e+06	528166	NAD83	12N			2008-08-17	Barnum Rock area	JES-08-395	291	22	mylonitic foliation			Windy Point
JES-08-395		32.409	-110.7	3.58581e+06	528166	NAD83	12N			2008-08-17	Barnum Rock area	JES-08-395	37	22	mylonitic lineation	trend and plunge		Windy Point
JES-11-001		32.3684	-110.717	3.58131e+06	526593	NAD83	12N			2010-07-24	Windy Point	JES-11-001	40	1	mylonitic lineation	trend and plunge		Windy Point
JES-11-002		32.3681	-110.718	3.58128e+06	526525	NAD83	12N			2010-07-24	Windy Point	JES-11-002	40	1	mylonitic lineation, up-dip arrow	trend and plunge	SW	Windy Point
JES-11-003		32.3679	-110.718	3.58125e+06	526505	NAD83	12N			2010-07-24	Windy Point	JES-11-003	43	2	mylonitic lineation, up-dip arrow	trend and plunge	SW	Windy Point
JES-11-004		32.3676	-110.718	3.58121e+06	526492	NAD83	12N			2010-07-24	Windy Point	JES-11-004	37	2	mylonitic lineation	trend and plunge		Windy Point
JES-11-005		32.3348	-110.726	3577585	525764	NAD83	12N			2010-07-25	Windy Point	JES-11-005	55	11	lineation	trend and plunge	NE	Windy Point
JES-11-007		32.386	-110.691	3.58326e+06	529076	NAD83	12N			2010-08-08	S Green Mtn	JES-11-007	35	5	mylonitic lineation	trend and plunge		Windy Point
JES-11-008		32.385	-110.693	3.58316e+06	528834	NAD83	12N			2010-08-08	S Green Mtn	JES-11-008	39	3	mylonitic lineation	trend and plunge		Windy Point
JES-13-279		32.2846	-110.722	3.57202e+06	526182	NAD 83	12N			2012-12-26	Agua Caliente Hill	JES-13-279	227	37	mylonitic foliation			Agua Caliente Hill
JES-13-279		32.2846	-110.722	3.57202e+06	526182	NAD 83	12N			2012-12-26	Agua Caliente Hill	JES-13-279	285	27	mylonitic lineation	trend and plunge		Agua Caliente Hill
JES-13-280		32.2839	-110.721	3.57194e+06	526253	NAD 83	12N			2012-12-26	Agua Caliente Hill	JES-13-280	187	25	mylonitic foliation			Agua Caliente Hill
JES-13-280		32.2839	-110.721	3.57194e+06	526253	NAD 83	12N			2012-12-26	Agua Caliente Hill	JES-13-280	300	24	mylonitic lineation	trend and plunge		Agua Caliente Hill
JES-13-281		32.2845	-110.72	3.572e+06	526331	NAD 83	12N			2012-12-26	Agua Caliente Hill	JES-13-281	240	24	mylonitic foliation			Agua Caliente Hill
JES-13-281		32.2845	-110.72	3.572e+06	526331	NAD 83	12N			2012-12-26	Agua Caliente Hill	JES-13-281	295	20	mylonitic lineation	trend and plunge		Agua Caliente Hill
JES-13-282		32.2857	-110.719	3.57214e+06	526481	NAD 83	12N			2012-12-26	Agua Caliente Hill	JES-13-282	335	27	mylonitic foliation			Agua Caliente Hill
JES-13-282		32.2857	-110.719	3.57214e+06	526481	NAD 83	12N			2012-12-26	Agua Caliente Hill	JES-13-282	267	22	mylonitic lineation	trend and plunge		Agua Caliente Hill
JES-13-284		32.2861	-110.717	3.57218e+06	526640	NAD 83	12N			2012-12-26	Agua Caliente Hill	JES-13-284	198	46	mylonitic foliation			Agua Caliente Hill
JES-13-284		32.2861	-110.717	3.57218e+06	526640	NAD 83	12N			2012-12-26	Agua Caliente Hill	JES-13-284	311	31	mylonitic lineation	trend and plunge		Agua Caliente Hill
JES-13-285		32.2863	-110.716	3.57221e+06	526734	NAD 83	12N			2012-12-26	Agua Caliente Hill	JES-13-285	225	43	mylonitic foliation			Agua Caliente Hill
JES-13-285		32.2863	-110.716	3.57221e+06	526734	NAD 83	12N			2012-12-26	Agua Caliente Hill	JES-13-285	334	37	mylonitic lineation	trend and plunge		Agua Caliente Hill
JES-13-729		32.2765	-110.706	3.57112e+06	527667	NAD 83	12N			2013-03-29	Agua Caliente Hill	JES-13-729	107	25	mylonitic foliation			Agua Caliente Hill
JES-13-729		32.2765	-110.706	3.57112e+06	527667	NAD 83	12N			2013-03-29	Agua Caliente Hill	JES-13-729	256	14	mylonitic lineation	trend and plunge		Agua Caliente Hill
JES-13-730		32.2765	-110.705	3.57113e+06	527774	NAD 83	12N			2013-03-29	Agua Caliente Hill	JES-13-730	249	12	mylonitic lineation			Agua Caliente Hill
JES-13-731		32.2777	-110.704	3.57126e+06	527851	NAD 83	12N			2013-03-29	Agua Caliente Hill	JES-13-731	253	9	mylonitic lineation			Agua Caliente Hill
JES-13-732		32.2796	-110.703	3.57146e+06	527957	NAD 83	12N			2013-03-29	Agua Caliente Hill	JES-13-732	243	4	mylonitic lineation			Agua Caliente Hill
JES-13-733		32.2879	-110.695	3.57239e+06	528708	NAD 83	12N			2013-03-29	Agua Caliente Hill	JES-13-733	58	1	mylonitic lineation			Agua Caliente Hill
JES-13-734		32.289	-110.693	3.57251e+06	528935	NAD 83	12N			2013-03-29	Agua Caliente Hill	JES-13-734	230	40	mylonitic foliation			Agua Caliente Hill
JES-13-734		32.289	-110.693	3.57251e+06	528935	NAD 83	12N			2013-03-29	Agua Caliente Hill	JES-13-734	70	20	mylonitic lineation	trend and plunge		Agua Caliente Hill
JES-13-737		32.2927	-110.693	3.57292e+06	528860	NAD 83	12N			2013-03-29	Agua Caliente Hill	JES-13-737	66	9	mylonitic lineation	trend and plunge		Agua Caliente Hill
JES-13-738		32.2922	-110.697	3.57287e+06	528488	NAD 83	12N			2013-03-29	Agua Caliente Hill	JES-13-738	218	33	mylonitic foliation			Agua Caliente Hill
JES-13-738		32.2922	-110.697	3.57287e+06	528488	NAD 83	12N			2013-03-29	Agua Caliente Hill	JES-13-738	251	1	mylonitic lineation	trend and plunge		Agua Caliente Hill
JES-13-740		32.2901	-110.701	3.57263e+06	528147	NAD 83	12N			2013-03-29	Agua Caliente Hill	JES-13-740	62	12	mylonitic lineation	trend and plunge		Agua Caliente Hill
JES-13-741		32.2885	-110.705	3.57246e+06	527787	NAD 83	12N			2013-03-29	Agua Caliente Hill	JES-13-741	238	6	mylonitic lineation	trend and plunge		Agua Caliente Hill
JES-13-742		32.2877	-110.706	3.57236e+06	527679	NAD 83	12N			2013-03-29	Agua Caliente Hill	JES-13-742	60	2	mylonitic lineation	trend and plunge		Agua Caliente Hill
JES-14-001		32.2765	-110.706	3.57112e+06	527671	NAD 83	12N			2013-11-13	Agua Caliente Hill	JES-14-001	128	28	mylonitic foliation			Agua Caliente Hill
JES-14-001		32.2765	-110.706	3.57112e+06	527671	NAD 83	12N			2013-11-13	Agua Caliente Hill	JES-14-001	65	4	mylonitic lineation	trend and plunge		Agua Caliente Hill
JES-14-002		32.2766	-110.705	3.57113e+06	527778	NAD 83	12N			2013-11-13	Agua Caliente Hill	JES-14-002	244	16	mylonitic lineation	trend and plunge		Agua Caliente Hill
JES-14-003		32.2768	-110.704	3.57116e+06	527863	NAD 83	12N			2013-11-13	Agua Caliente Hill	JES-14-003	127	20	mylonitic foliation	parallel gneissic layering		Agua Caliente Hill
JES-14-003		32.2768	-110.704	3.57116e+06	527863	NAD 83	12N			2013-11-13	Agua Caliente Hill	JES-14-003	246	15	mylonitic lineation	trend and plunge		Agua Caliente Hill
JES-14-004		32.2795	-110.703	3.57146e+06	527957	NAD 83	12N			2013-11-13	Agua Caliente Hill	JES-14-004	197	12	mylonitic foliation			Agua Caliente Hill
JES-14-004		32.2795	-110.703	3.57146e+06	527957	NAD 83	12N			2013-11-13	Agua Caliente Hill	JES-14-004	242	8	mylonitic lineation	trend and plunge		Agua Caliente Hill
JES-19-031		32.3363	-110.634	3.57757e+06	534510	NAD83	12S			2018-12-10	Bellota W	JES-19-031	40	7	mylo lineation		SW	Bellota W	1204
JES-19-032		32.3369	-110.635	3.57764e+06	534455	NAD83	12S			2018-12-10	Bellota W	JES-19-032	35	9	mylo lineation			Bellota W	1221
JES-19-033		32.3377	-110.639	3.57772e+06	533989	NAD83	12S			2018-12-10	Bellota W	JES-19-033	28	9	mylo lineation			Bellota W	1229
JES-19-034		32.3387	-110.64	3.57784e+06	533904	NAD83	12S			2018-12-10	Bellota W	JES-19-034	27	2	mylo lineation			Bellota W	1269
JES-19-036		32.3385	-110.644	3.57781e+06	533585	NAD83	12S			2018-12-10	Bellota W	JES-19-036	31	5	mylo lineation			Bellota W	1265
JES-19-037		32.3411	-110.647	3.5781e+06	533315	NAD83	12S			2018-12-10	Bellota W	JES-19-037	201	6	mylo lineation			Bellota W	1308
JES-19-038		32.3422	-110.649	3.57823e+06	533087	NAD83	12S			2018-12-10	Bellota W	JES-19-038	27	5	mylo lineation			Bellota W	1344
JES-19-040		32.3436	-110.648	3.57838e+06	533166	NAD83	12S			2018-12-10	Bellota W	JES-19-040	31	17	mylo lineation			Bellota W	1321
JES-19-043		32.3454	-110.648	3.57858e+06	533139	NAD83	12S			2018-12-10	Bellota W	JES-19-043	201	19	mylo lineation			Bellota W	1270
JES-19-044		32.3435	-110.643	3.57837e+06	533700	NAD83	12S			2018-12-10	Bellota W	JES-19-044	5	5	mylo lineation			Bellota W	1240
JES-19-045		32.34	-110.639	3.57798e+06	533997	NAD83	12S			2018-12-10	Bellota W	JES-19-045	19	10	mylo lineation			Bellota W	1227
JES-19-046		32.3387	-110.634	3.57784e+06	534461	NAD83	12S			2018-12-10	Bellota W	JES-19-046	15	15	mylo lineation			Bellota W	1226
JES-19-047		32.3364	-110.635	3.57759e+06	534446	NAD83	12S			2019-01-17	Bellota W	JES-19-047	34	18	mylo lineation			Bellota W	1216
JES-19-048		32.3361	-110.636	3.57755e+06	534310	NAD83	12S			2019-01-17	Bellota W	JES-19-048	32	2	mylo lineation		SW	Bellota W	1217
JES-19-050		32.3371	-110.633	3.57767e+06	534596	NAD83	12S			2019-01-17	Bellota W	JES-19-050	35	1	mylo lineation		SW	Bellota W	1211
JES-19-051		32.3346	-110.631	3.57739e+06	534764	NAD83	12S			2019-01-17	Bellota W	JES-19-051	208	1	mylo lineation			Bellota W	1218
JES-19-052		32.3346	-110.632	3.57739e+06	534648	NAD83	12S			2019-01-17	Bellota W	JES-19-052	203	1	mylo lineation			Bellota W	1223
JES-19-053		32.3348	-110.606	3.57742e+06	537106	NAD83	12S			2019-01-27	Bellota E	JES-19-053	212	4	mylo lineation			Bellota E	1192
JES-19-054		32.3362	-110.606	3.57757e+06	537137	NAD83	12S			2019-01-27	Bellota E	JES-19-054	207	4	mylo lineation		SW	Bellota E	1189
JES-19-055		32.3371	-110.605	3.57767e+06	537247	NAD83	12S			2019-01-27	Bellota E	JES-19-055	207	12	mylo lineation		SW	Bellota E	1184
JES-19-056		32.3377	-110.604	3.57774e+06	537348	NAD83	12S			2019-01-27	Bellota E	JES-19-056	3	2	mylo lineation			Bellota E	1182
JES-19-057		32.338	-110.604	3.57778e+06	537372	NAD83	12S			2019-01-27	Bellota E	JES-19-057	10	11	mylo lineation			Bellota E	1178
JES-19-058		32.3385	-110.603	3.57783e+06	537388	NAD83	12S			2019-01-27	Bellota E	JES-19-058	13	12	mylo lineation			Bellota E	1180
JES-19-059		32.3402	-110.603	3.57802e+06	537458	NAD83	12S			2019-01-27	Bellota E	JES-19-059	11	6	mylo lineation			Bellota E	1171
JES-19-059.5		32.3416	-110.601	3578175	537612	NAD83	12S			2019-01-27	Bellota E	JES-19-059.5	181	3	mylo lineation		NE	Bellota E
JES-19-060		32.3429	-110.599	3.57832e+06	537841	NAD83	12S			2019-01-27	Bellota E	JES-19-060	5	11	mylo lineation			Bellota E	1160
JES-19-062		32.3424	-110.601	3.57826e+06	537579	NAD83	12S			2019-01-27	Bellota E	JES-19-062	8	10	mylo lineation			Bellota E	1171
JES-19-063		32.3424	-110.604	3.57827e+06	537327	NAD83	12S			2019-01-27	Bellota E	JES-19-063	190	2	mylo lineation			Bellota E	1183
JES-19-064		32.3415	-110.605	3.57816e+06	537201	NAD83	12S			2019-01-27	Bellota E	JES-19-064	25	5	mylo lineation			Bellota E	1230
JES-19-065		32.341	-110.607	3.57811e+06	537033	NAD83	12S			2019-01-27	Bellota E	JES-19-065	199	11	mylo lineation			Bellota E	1236
JES-19-066		32.3382	-110.611	3.57779e+06	536629	NAD83	12S			2019-01-27	Bellota E	JES-19-066	196	11	mylo lineation			Bellota E	1248
JES-19-067		32.3367	-110.612	3.57763e+06	536602	NAD83	12S			2019-01-27	Bellota E	JES-19-067	29	6	mylo lineation			Bellota E	1228
JES-19-075		32.3367	-110.587	3.57763e+06	538888	NAD83	12S			2019-02-28	Bellota E	JES-19-075	12	14	mylo lineation		NE	Bellota E	1185
JES-19-075		32.3367	-110.587	3.57763e+06	538888	NAD83	12S			2019-02-28	Bellota E	JES-19-075	238	18	mylo foliation		NE	Bellota E	1185
JES-19-079		32.3447	-110.586	3.57852e+06	538984	NAD83	12S			2019-02-28	Bellota E	JES-19-079	193	11	mylo lineation			Bellota E	1187
JES-19-080		32.3437	-110.587	3.57841e+06	538899	NAD83	12S			2019-02-28	Bellota E	JES-19-080	9	17	mylo lineation			Bellota E	1215
JES-19-081		32.3423	-110.59	3.57826e+06	538673	NAD83	12S			2019-02-28	Bellota E	JES-19-081	11	5	mylo lineation			Bellota E	1223
JES-19-082		32.3407	-110.592	3.57807e+06	538471	NAD83	12S			2019-02-28	Bellota E	JES-19-082	200	4	mylo lineation			Bellota E	1253
JES-19-083		32.3403	-110.592	3.57804e+06	538446	NAD83	12S			2019-02-28	Bellota E	JES-19-083	200	5	mylo lineation		SW	Bellota E	1254
JES-98-001		32.165	-110.724	3.55875e+06	525990	NAD83	12N			1998-12-10	Tanque Verde Ridge	JES-98-001	240	10	mylonitic lineation			Tanque Verde Ridge
JES-98-002		32.1635	-110.724	3.55859e+06	525980	NAD83	12N			1998-12-10	Tanque Verde Ridge	JES-98-002	240	8	mylonitic lineation			Tanque Verde Ridge
JES-98-003		32.1623	-110.724	3.55846e+06	526039	NAD83	12N			1998-12-10	Tanque Verde Ridge	JES-98-003	237	12	mylonitic lineation			Tanque Verde Ridge
JES-98-004		32.1605	-110.722	3.55826e+06	526171	NAD83	12N			1998-12-10	Tanque Verde Ridge	JES-98-004	236	17	mylonitic lineation			Tanque Verde Ridge
JES-98-005		32.1592	-110.722	3.55812e+06	526256	NAD83	12N			1998-12-10	Tanque Verde Ridge	JES-98-005	234	27	mylonitic lineation			Tanque Verde Ridge
JES-98-006		32.1577	-110.72	3.55795e+06	526376	NAD83	12N			1998-12-10	Tanque Verde Ridge	JES-98-006	240	10	mylonitic lineation			Tanque Verde Ridge
JES-98-007		32.157	-110.718	3.55787e+06	526545	NAD83	12N			1998-12-10	Tanque Verde Ridge	JES-98-007	235	12	mylonitic lineation			Tanque Verde Ridge
JES-98-008		32.1561	-110.719	3.55777e+06	526500	NAD83	12N			1998-12-10	Tanque Verde Ridge	JES-98-008	220	15	mylonitic lineation			Tanque Verde Ridge
JES-98-009		32.1563	-110.719	3.5578e+06	526484	NAD83	12N			1998-12-10	Tanque Verde Ridge	JES-98-009	228	24	mylonitic lineation			Tanque Verde Ridge
JES-98-010		32.1557	-110.72	3.55773e+06	526410	NAD83	12N			1998-12-10	Tanque Verde Ridge	JES-98-010	224	30	mylonitic lineation			Tanque Verde Ridge
JES-98-011		32.1551	-110.721	3.55767e+06	526343	NAD83	12N			1998-12-10	Tanque Verde Ridge	JES-98-011	234	28	mylonitic lineation			Tanque Verde Ridge
JES-98-012		32.1548	-110.722	3.55762e+06	526240	NAD83	12N			1998-12-10	Tanque Verde Ridge	JES-98-012	234	18	mylonitic lineation			Tanque Verde Ridge
JES-98-013		32.1564	-110.718	3.55781e+06	526565	NAD83	12N			1998-12-10	Tanque Verde Ridge	JES-98-013	233	28	mylonitic lineation			Tanque Verde Ridge
JES-98-014		32.1572	-110.717	3.55789e+06	526683	NAD83	12N			1998-12-10	Tanque Verde Ridge	JES-98-014	234	21	mylonitic lineation			Tanque Verde Ridge
JES-98-015		32.1579	-110.716	3.55797e+06	526756	NAD83	12N			1998-12-10	Tanque Verde Ridge	JES-98-015	242	21	mylonitic lineation			Tanque Verde Ridge
JES-98-016		32.1591	-110.716	3.5581e+06	526794	NAD83	12N			1998-12-10	Tanque Verde Ridge	JES-98-016	239	25	mylonitic lineation			Tanque Verde Ridge
JES-98-017		32.1603	-110.715	3.55824e+06	526886	NAD83	12N			1998-12-10	Tanque Verde Ridge	JES-98-017	244	2	mylonitic lineation			Tanque Verde Ridge
JES-98-018		32.1613	-110.714	3.55836e+06	526937	NAD83	12N			1998-12-10	Tanque Verde Ridge	JES-98-018	248	17	mylonitic lineation			Tanque Verde Ridge
JES-98-019		32.1616	-110.713	3.55838e+06	527075	NAD83	12N			1998-12-10	Tanque Verde Ridge	JES-98-019	250	14	mylonitic lineation			Tanque Verde Ridge
JES-98-020		32.1624	-110.711	3.55847e+06	527235	NAD83	12N			1998-12-10	Tanque Verde Ridge	JES-98-020	248	14	mylonitic lineation			Tanque Verde Ridge
JES-98-021		32.1632	-110.71	3.55856e+06	527361	NAD83	12N			1998-12-10	Tanque Verde Ridge	JES-98-021	253	24	mylonitic lineation			Tanque Verde Ridge
JES-98-022		32.1638	-110.709	3.55863e+06	527430	NAD83	12N			1998-12-10	Tanque Verde Ridge	JES-98-022	240	4	mylonitic lineation			Tanque Verde Ridge
JES-98-023		32.1638	-110.709	3.55863e+06	527467	NAD83	12N			1998-12-10	Tanque Verde Ridge	JES-98-023	247	11	mylonitic lineation			Tanque Verde Ridge
JES-98-024		32.1654	-110.707	3.55881e+06	527640	NAD83	12N			1998-12-10	Tanque Verde Ridge	JES-98-024	245	9	mylonitic lineation			Tanque Verde Ridge
JES-98-025		32.1663	-110.705	3.55891e+06	527857	NAD83	12N			1998-12-10	Tanque Verde Ridge	JES-98-025	243	18	mylonitic lineation			Tanque Verde Ridge
JES-98-026		32.1673	-110.704	3.55902e+06	527930	NAD83	12N			1998-12-10	Tanque Verde Ridge	JES-98-026	245	13	mylonitic lineation			Tanque Verde Ridge
JES-98-027		32.1681	-110.703	3.55911e+06	528014	NAD83	12N			1998-12-10	Tanque Verde Ridge	JES-98-027	243	4	mylonitic lineation			Tanque Verde Ridge
JES-98-028		32.1677	-110.701	3.55906e+06	528199	NAD83	12N			1998-12-10	Tanque Verde Ridge	JES-98-028	242	12	mylonitic lineation			Tanque Verde Ridge
JES-98-101		32.3359	-110.724	3.57771e+06	525931	NAD83	12N			1998-08-28	Prison Camp west 98	JES-98-101	352	14	mylonitic foliation			Sabino - Bear
JES-98-101		32.3359	-110.724	3.57771e+06	525931	NAD83	12N			1998-08-28	Prison Camp west 98	JES-98-101	52	12.1244	mylonitic lineation	trend and plunge		Sabino - Bear
JES-98-102		32.3397	-110.729	3.57812e+06	525539	NAD83	12N			1998-08-28	Prison Camp west 98	JES-98-102	330	18	mylonitic foliation			Sabino - Bear
JES-98-102		32.3397	-110.729	3.57812e+06	525539	NAD83	12N			1998-08-28	Prison Camp west 98	JES-98-102	55	17.9315	mylonitic lineation	trend and plunge		Sabino - Bear
JES-98-103		32.3406	-110.732	3.57822e+06	525246	NAD83	12N			1998-08-28	Prison Camp west 98	JES-98-103	325	18	mylonitic foliation			Sabino - Bear
JES-98-103		32.3406	-110.732	3.57822e+06	525246	NAD83	12N			1998-08-28	Prison Camp west 98	JES-98-103	44	17.6693	mylonitic lineation	trend and plunge		Sabino - Bear
JES-98-104		32.3411	-110.732	3.57827e+06	525203	NAD83	12N			1998-08-28	Prison Camp west 98	JES-98-104	340	34	mylonitic foliation			Sabino - Bear
JES-98-104		32.3411	-110.732	3.57827e+06	525203	NAD83	12N			1998-08-28	Prison Camp west 98	JES-98-104	47	31.2972	mylonitic lineation	trend and plunge		Sabino - Bear
JES-98-105		32.3507	-110.743	3.57933e+06	524224	NAD83	12N			1998-08-28	Prison Camp west 98	JES-98-105	54	1	mylonitic lineation	trend and plunge		Sabino - Bear
JES-98-106		32.345	-110.741	3.57871e+06	524382	NAD83	12N			1998-08-28	Prison Camp west 98	JES-98-106	42	32	mylonitic lineation	trend and plunge		Sabino - Bear
JES-98-107		32.3434	-110.739	3.57853e+06	524602	NAD83	12N			1998-08-28	Prison Camp west 98	JES-98-107	40	44	mylonitic lineation	trend and plunge		Sabino - Bear
JES-98-108		32.3421	-110.735	3.57839e+06	524953	NAD83	12N			1998-08-28	Prison Camp west 98	JES-98-108	34	26	mylonitic lineation	trend and plunge		Sabino - Bear
JES-98-109		32.3416	-110.733	3.57833e+06	525132	NAD83	12N			1998-08-28	Prison Camp west 98	JES-98-109	30	20	mylonitic lineation	trend and plunge		Sabino - Bear
SMR-04-0628		32.3398	-110.729	3.57813e+06	525529	NAD83	12_NAD27	3.57793e+06	525590		Sycamore Reservoir area	SMR-04-0628	43	5	lin	lineation stretch shape mylonitic Description
SMR-04-0629		32.3406	-110.731	3.57822e+06	525298	NAD83	12_NAD27	3.57802e+06	525359		Sycamore Reservoir area	SMR-04-0629	40	10	lin	lineation stretch shape mylonitic Description
SMR-04-0630		32.3418	-110.733	3.57836e+06	525099	NAD83	12_NAD27	3.57816e+06	525160		Sycamore Reservoir area	SMR-04-0630	45	5	lin	lineation stretch shape mylonitic Description
SMR-04-0632		32.3418	-110.734	3.57835e+06	525013	NAD83	12_NAD27	3.57815e+06	525074		Sycamore Reservoir area	SMR-04-0632	48	11	lin	lineation mylonitic stretch shape directed Description	SW
SMR-04-0633		32.3422	-110.735	3.57839e+06	524930	NAD83	12_NAD27	3.5782e+06	524991		Sycamore Reservoir area	SMR-04-0633	270	20	fol	Mylonitic foliation protomylonite Description
SMR-04-0633		32.3422	-110.735	3.57839e+06	524930	NAD83	12_NAD27	3.5782e+06	524991		Sycamore Reservoir area	SMR-04-0633	26	18	lin	lineation stretch shape mylonitic Description
SMR-04-0634		32.3423	-110.736	3.57841e+06	524801	NAD83	12_NAD27	3.57822e+06	524862		Sycamore Reservoir area	SMR-04-0634	49	10	lin	lineation stretch shape mylonitic Description
SMR-04-0635		32.3441	-110.739	3.5786e+06	524578	NAD83	12_NAD27	3.5784e+06	524639		Sycamore Reservoir area	SMR-04-0635	264	26	fol	Mylonitic foliation weak grain shape fabric Description
SMR-04-0635		32.3441	-110.739	3.5786e+06	524578	NAD83	12_NAD27	3.5784e+06	524639		Sycamore Reservoir area	SMR-04-0635	32	23	lin	lineation stretch shape mylonitic Description
SMR-04-0637		32.3449	-110.741	3.5787e+06	524351	NAD83	12_NAD27	3.5785e+06	524412		Sycamore Reservoir area	SMR-04-0637	264	35	fol	Mylonitic foliation protomylonite Description
SMR-04-0637		32.3449	-110.741	3.5787e+06	524351	NAD83	12_NAD27	3.5785e+06	524412		Sycamore Reservoir area	SMR-04-0637	37	27	lin	lineation mylonitic stretch shape directed Description
SMR-04-0638		32.3474	-110.744	3.57897e+06	524118	NAD83	12_NAD27	3.57877e+06	524179		Sycamore Reservoir area	SMR-04-0638	38	27	lin	lineation stretch shape mylonitic Description
SMR-04-0640		32.349	-110.745	3.57915e+06	524000	NAD83	12_NAD27	3.57895e+06	524061		Sycamore Reservoir area	SMR-04-0640	247	17	fol	Mylonitic foliation protomylonite Description
SMR-04-0640		32.349	-110.745	3.57915e+06	524000	NAD83	12_NAD27	3.57895e+06	524061		Sycamore Reservoir area	SMR-04-0640	38	5	lin	lineation stretch shape mylonitic Description
SMR-04-0641		32.3497	-110.745	3.57922e+06	523990	NAD83	12_NAD27	3.57903e+06	524051		Sycamore Reservoir area	SMR-04-0641	293	25	fol	Mylonitic foliation protomylonite Description	NE
SMR-04-0641		32.3497	-110.745	3.57922e+06	523990	NAD83	12_NAD27	3.57903e+06	524051		Sycamore Reservoir area	SMR-04-0641	13	35	lin	lineation mylonitic stretch shape directed Description	NE
SMR-04-0642		32.3504	-110.746	3.5793e+06	523936	NAD83	12_NAD27	3.5791e+06	523997		Sycamore Reservoir area	SMR-04-0642	256	34	fol	Mylonitic foliation protomylonite Description
SMR-04-0642		32.3504	-110.746	3.5793e+06	523936	NAD83	12_NAD27	3.5791e+06	523997		Sycamore Reservoir area	SMR-04-0642	44	30	lin	lineation stretch shape mylonitic Description	NE
SMR-04-0643		32.349	-110.747	3.57914e+06	523842	NAD83	12_NAD27	3.57895e+06	523903		Sycamore Reservoir area	SMR-04-0643	289	33	fol	Mylonitic foliation protomylonite Description
SMR-04-0643		32.349	-110.747	3.57914e+06	523842	NAD83	12_NAD27	3.57895e+06	523903		Sycamore Reservoir area	SMR-04-0643	43	16	lin	lineation stretch shape mylonitic Description
SMR-04-0644		32.3501	-110.748	3.57928e+06	523700	NAD83	12_NAD27	3.57908e+06	523761		Sycamore Reservoir area	SMR-04-0644	287	17	fol	Mylonitic foliation protomylonite Description
SMR-04-0644		32.3501	-110.748	3.57928e+06	523700	NAD83	12_NAD27	3.57908e+06	523761		Sycamore Reservoir area	SMR-04-0644	36	12	lin	lineation stretch shape mylonitic Description
SMR-04-0645		32.3493	-110.748	3.57918e+06	523683	NAD83	12_NAD27	3.57899e+06	523744		Sycamore Reservoir area	SMR-04-0645	248	18	fol	Mylonitic foliation protomylonite Description
SMR-04-0645		32.3493	-110.748	3.57918e+06	523683	NAD83	12_NAD27	3.57899e+06	523744		Sycamore Reservoir area	SMR-04-0645	47	8	lin	lineation mylonitic stretch shape directed Description	NE
SMR-04-0647		32.3492	-110.749	3.57918e+06	523607	NAD83	12_NAD27	3.57898e+06	523668		Sycamore Reservoir area	SMR-04-0647	45	22	lin	lineation stretch shape mylonitic Description
SMR-04-0648		32.349	-110.75	3.57915e+06	523540	NAD83	12_NAD27	3.57895e+06	523601		Sycamore Reservoir area	SMR-04-0648	239	19	fol	Mylonitic foliation protomylonite Description
SMR-04-0650		32.3501	-110.751	3.57927e+06	523391	NAD83	12_NAD27	3.57907e+06	523452		Sycamore Reservoir area	SMR-04-0650	260	10	fol	Mylonitic foliation protomylonite Description
SMR-04-0651		32.3509	-110.752	3.57936e+06	523299	NAD83	12_NAD27	3.57916e+06	523360		Sycamore Reservoir area	SMR-04-0651	249	18	fol	Mylonitic foliation weak grain shape fabric Description
SMR-04-0652		32.3507	-110.754	3.57933e+06	523106	NAD83	12_NAD27	3.57914e+06	523167		Sycamore Reservoir area	SMR-04-0652	43	7	lin	lineation stretch shape mylonitic Description
SMR-04-0653		32.3501	-110.755	3.57927e+06	523067	NAD83	12_NAD27	3.57907e+06	523128		Sycamore Reservoir area	SMR-04-0653	234	10	fol	Mylonitic foliation weak grain shape fabric Description
SMR-04-0654		32.3489	-110.755	3.57913e+06	523045	NAD83	12_NAD27	3.57893e+06	523106		Sycamore Reservoir area	SMR-04-0654	53	5	lin	lineation stretch shape mylonitic Description
SMR-04-0657		32.3492	-110.756	3.57917e+06	522972	NAD83	12_NAD27	3.57897e+06	523033		Sycamore Reservoir area	SMR-04-0657	47	20	lin	lineation stretch shape mylonitic Description
SMR-04-0659		32.3507	-110.755	3.57933e+06	523037	NAD83	12_NAD27	3.57913e+06	523098		Sycamore Reservoir area	SMR-04-0659	51	12	lin	lineation mylonitic stretch shape directed Description	NE
SMR-04-0660		32.3508	-110.755	3.57935e+06	523022	NAD83	12_NAD27	3.57915e+06	523083		Sycamore Reservoir area	SMR-04-0660	307	15	fol	Mylonitic foliation protomylonite Description
SMR-04-0660		32.3508	-110.755	3.57935e+06	523022	NAD83	12_NAD27	3.57915e+06	523083		Sycamore Reservoir area	SMR-04-0660	56	14	lin	lineation stretch shape mylonitic Description
JES-19-084		32.3775	-110.703	3582324	527954	NAD83					Lizard Rock	JES-19-084	218.7	3	mylonitic lineation	trend and plunge
JES-19-085				3582307	527909	NAD83					Lizard Rock	JES-19-085	223	3	mylonitic lineation	trend and plunge
JES-19-086				3582232	527882	NAD83					Lizard Rock	JES-19-086	38	1	mylonitic lineation	trend and plunge
JES-19-087				3582171	527863	NAD83					Lizard Rock	JES-19-087	219	4	mylonitic lineation	trend and plunge
JES-19-087.5				3582602	528410	NAD83					Lizard Rock	JES-19-087.5	30.75	2	mylonitic lineation	trend and plunge
JES-19-088				3582552	528410	NAD83					Lizard Rock	JES-19-088	212	15	mylonitic lineation	trend and plunge
JES-19-089				3582563	528484	NAD83					Lizard Rock	JES-19-089	40.5	12	mylonitic lineation	trend and plunge
JES-19-090				3583477	527485	NAD83					Rose Canyon Lake	JES-19-090	36	11	mylonitic lineation	trend and plunge
JES-19-091				3583522	527368	NAD83					Rose Canyon Lake	JES-19-091	39	6.6	mylonitic lineation	trend and plunge

## Sheet: Table S4. Suizo-Durham data
AREA	STRUCTMEAS	STATION	UTME	UTMN	TYPEID	STRUCTTYPE	STRUCTUREN	AZIMUTH	DIP	TRACKINGNA	NOTES	CARTOOBJID	CARTOOBJDS	ROTATE	LABEL
DurhamNE	79	SMR-02-0148	486406	3.62336e+06	3387	lineation, mylonitic (stretch/shape), directed		62	10	SMRFieldNoteDataEntry	deflection of foliation into mylonite zones (Ramsay-Graham geometry)	2150	21	28	10
DurhamNE	81	SMR-02-0150	486385	3.62324e+06	3387	lineation, mylonitic (stretch/shape), directed		51	69	SMRFieldNoteDataEntry		2150	21	39	69
DurhamSW	1143	SMR-02-0289	486879	3619769	3387	lineation, mylonitic (stretch/shape), directed	stretch in mylonitic foliation	240	-58	SMRFieldNoteDataEntry	good top to southwest asymmetric feldspar and sc fabric	2150	21	-150	-58
Suizo	1419	SMR-02-0630	487577	3611670	3387	lineation, mylonitic (stretch/shape), directed	stretch in mylonitic foliation	257	-38	SMRFieldNoteDataEntry	quartz stretch in transposed quartz vein in speckled granodiorite. Good top to southwest s-c fabric.	2150	21	-167	-38
Suizo	33014	SMR-02-1177	488329	3.61535e+06	3387	lineation, mylonitic (stretch/shape), directed	stretching lineation, directed	65	-18	SMRChiefButteStructureData	good top to SW sc & Ramsay-Graham geometry	2151	21	25	18
DurhamNE	74	SMR-02-0140	486736	3.62298e+06	574	lineation, stretch/shape (mylonitic)		68	30	SMRFieldNoteDataEntry	stretch in quartz in granitoid vein in diorite-granodiorite unit; lineation not present in diorite.	2149	21	22	30
DurhamNE	95	SMR-02-0163	486748	3622601	574	lineation, stretch/shape (mylonitic)		65	236	SMRFieldNoteDataEntry	mylonitic folliation in aplite dike; sense of shear from s-c fabric	2149	21	25	236
DurhamSW	2	SMR-02-0002	486416	3.62113e+06	574	lineation, stretch/shape (mylonitic)		28	44	SMRFieldNoteDataEntry	none	2149	21	62	44
DurhamSW	99	SMR-02-0257	486134	3.62001e+06	574	lineation, stretch/shape (mylonitic)	stretch in mylonitic foliation	44	48	SMRFieldNoteDataEntry	none	2149	21	46	48
DurhamSW	1096	SMR-02-0236	486030	3.62046e+06	574	lineation, stretch/shape (mylonitic)	stretch in mylonitic foliation	43	45	SMRFieldNoteDataEntry	none	2149	21	47	45
DurhamSW	1111	SMR-02-0249	486558	3620256	574	lineation, stretch/shape (mylonitic)	stretch in mylonitic foliation	53	39	SMRFieldNoteDataEntry	none	2149	21	37	39
DurhamSW	1127	SMR-02-0275	486896	3.62e+06	574	lineation, stretch/shape (mylonitic)	stretch in mylonitic foliation	69	43	SMRFieldNoteDataEntry	none	2149	21	21	43
DurhamSW	1129	SMR-02-0276	486842	3.62016e+06	574	lineation, stretch/shape (mylonitic)	stretch in mylonitic foliation	50	58	SMRFieldNoteDataEntry	none	2149	21	40	58
DurhamSW	1133	SMR-02-0277	486820	3620158	574	lineation, stretch/shape (mylonitic)	stretch in mylonitic foliation	46	51	SMRFieldNoteDataEntry	none	2149	21	44	51
DurhamSW	1137	SMR-02-0281	486719	3620182	574	lineation, stretch/shape (mylonitic)	stretch in mylonitic foliation	42	53	SMRFieldNoteDataEntry	none	2149	21	48	53
DurhamSW	1161	SMR-02-0348	486037	3.61903e+06	574	lineation, stretch/shape (mylonitic)	stretch in mylonitic foliation	59	30	SMRFieldNoteDataEntry	l>s fabric	2149	21	31	30
DurhamSW	1221	SMR-02-0509	485624	3.61767e+06	574	lineation, stretch/shape (mylonitic)	stretch in mylonitic foliation	48	25	SMRFieldNoteDataEntry	none	2149	21	42	25
DurhamSW	1224	SMR-02-0510	485629	3.61758e+06	574	lineation, stretch/shape (mylonitic)		49	32	SMRFieldNoteDataEntry	none	2149	21	41	32
DurhamSW	1230	SMR-02-0513	485528	3.61747e+06	574	lineation, stretch/shape (mylonitic)	stretch in mylonitic foliation	55	7	SMRFieldNoteDataEntry	none	2149	21	35	7
DurhamSW	1255	SMR-02-0525	484875	3617160	574	lineation, stretch/shape (mylonitic)	stretch in mylonitic foliation	56	31	SMRFieldNoteDataEntry	1-meter thick mylonite zone in mostly non-mylontic rock.	2149	21	34	31
DurhamSW	1260	SMR-02-0526	484809	3.61718e+06	574	lineation, stretch/shape (mylonitic)		51	47	SMRFieldNoteDataEntry	none	2149	21	39	47
DurhamSW	1270	SMR-02-0528	484869	3.61732e+06	574	lineation, stretch/shape (mylonitic)	stretch in mylonitic foliation	55	57	SMRFieldNoteDataEntry	in mylonitic ledge about 15 meter thick	2149	21	35	57
DurhamSW	1273	SMR-02-0533	484999	3.61775e+06	574	lineation, stretch/shape (mylonitic)		58	41	SMRFieldNoteDataEntry	1.5 meter thick band.	2149	21	32	41
DurhamSW	1280	SMR-02-0538	485411	3.61804e+06	574	lineation, stretch/shape (mylonitic)	stretch in mylonitic foliation	59	31	SMRFieldNoteDataEntry		2149	21	31	31
DurhamSW	2506	JES-02-0092	485937	3618536	574	lineation, stretch/shape (mylonitic)		47	41	SMRenterJESstructureData	none	0	21	-317
Suizo	63	SMR-02-0101	489606	3614393	574	lineation, stretch/shape (mylonitic)		21	65	SMRFieldNoteDataEntry		2149	21	69	65
Suizo	1412	SMR-02-0621	487758	3611895	574	lineation, stretch/shape (mylonitic)	stretch in mylonitic foliation	72	31	SMR_fieldData0618	lineation is quartz stretch in transposed quartz veins. Rock quite micaceous, little apparent TRIG. Dominant foliation clearly transposes old cm-scale laminated differentiated foliation	2149	21	18	31
Suizo	1421	SMR-02-0631	487429	3.61164e+06	574	lineation, stretch/shape (mylonitic)	stretch in mylonitic foliation	67	23	SMRFieldNoteDataEntry		2149	21	23	23
Suizo	1425	SMR-02-0632	487242	3.61157e+06	574	lineation, stretch/shape (mylonitic)	stretch in mylonitic foliation	77	18	SMR_fieldData0618	foliation is curviplanar.	2149	21	13	18
Suizo	1431	SMR-02-0641	487122	3611695	574	lineation, stretch/shape (mylonitic)	stretch in mylonitic foliation	73	27	SMRFieldNoteDataEntry	mylonitic foliation in Pinal schist sheed in leucogranite/pegmatite. Fabric domainal, weak to strong.	2149	21	17	27
Suizo	1435	SMR-02-0643	487219	3.61197e+06	574	lineation, stretch/shape (mylonitic)	stretch in mylonitic foliation	81	22	SMR_fieldData0618	quartz stretch	2149	21	9	22
Suizo	1445	SMR-02-0645	487365	3.61232e+06	574	lineation, stretch/shape (mylonitic)	stretch in mylonitic foliation	80	9	SMR_fieldData0618		2149	21	10	9
Suizo	1448	SMR-02-0646	487467	3612514	574	lineation, stretch/shape (mylonitic)	stretch in mylonitic foliation	66	27	SMR_fieldData0618		2149	21	24	27
Suizo	1455	SMR-02-0663	487763	3613437	574	lineation, stretch/shape (mylonitic)	stretch in mylonitic foliation	68	6	SMR_fieldData0618	lineation only visible in transposed quartz veins. A subparallel lineation in schist may be either stretch or intersection with transposed laminated differentiated foliation.	2149	21	22	6
Suizo	1460	SMR-02-0666	487894	3.61338e+06	574	lineation, stretch/shape (mylonitic)	stretch in mylonitic foliation	70	15	SMR_fieldData0618		2149	21	20	15
Suizo	1465	SMR-02-0668	487991	3613429	574	lineation, stretch/shape (mylonitic)	stretch in mylonitic foliation	66	16	SMRFieldNoteDataEntry	l>s fabric.	2149	21	24	16
Suizo	1469	SMR-02-0669	488040	3.61333e+06	574	lineation, stretch/shape (mylonitic)	stretch in mylonitic foliation	67	4	SMRFieldNoteDataEntry		2149	21	23	4
Suizo	1473	SMR-02-0671	487760	3.61311e+06	574	lineation, stretch/shape (mylonitic)	stretch in mylonitic foliation	70	9	SMRFieldNoteDataEntry		2149	21	20	9
Suizo	1475	SMR-02-0676	489223	3.61743e+06	574	lineation, stretch/shape (mylonitic)	stretch in mylonitic foliation	62	27	SMR_fieldNotes0619	quartz stretch	2149	21	28	27
Suizo	1483	SMR-02-0680	489135	3.61759e+06	574	lineation, stretch/shape (mylonitic)	stretch in mylonitic foliation	37	25	SMR_fieldNotes0619	none	2149	21	53	25
Suizo	1484	SMR-02-0693	488931	3.61747e+06	574	lineation, stretch/shape (mylonitic)		61	30	SMR_fieldNotes0619	none	2149	21	29	30
Suizo	1487	SMR-02-0695	489028	3.61741e+06	574	lineation, stretch/shape (mylonitic)	stretch in mylonitic foliation	65	21	SMR_fieldNotes0619	none	2149	21	25	21
Suizo	1490	SMR-02-0696	489091	3.61734e+06	574	lineation, stretch/shape (mylonitic)	stretch in mylonitic foliation	63	31	SMRFieldNoteDataEntry	none	2149	21	27	31
Suizo	1523	SMR-02-0720	488765	3.61664e+06	574	lineation, stretch/shape (mylonitic)	stretch in mylonitic foliation	70	39	SMR_fieldNotes0619	none	2149	21	20	39
Suizo	2174	SMR-02-0803	490331	3.61537e+06	574	lineation, stretch/shape (mylonitic)	quartz stretch	60	22	SMRFieldNoteDataEntry	quartz streaking on quartz vein; in schistose rock lineation appears to be intersection with older cm-scale compositional layering.	2149	21	30	22
Suizo	2177	SMR-02-0804	490135	3.61541e+06	574	lineation, stretch/shape (mylonitic)	quartz stretch	59	14	SMRFieldNoteDataEntry	lineation is intersection-like streaking, apparently parallel to quartz stretch.	2149	21	31	14
Suizo	2182	SMR-02-0807	490042	3.61583e+06	574	lineation, stretch/shape (mylonitic)	quartz stretch parallel to intersection	69	17	SMRFieldNoteDataEntry	lineation is quartz stretch parallel to intersection.	2149	21	21	17
Suizo	2187	SMR-02-0810	490050	3.6159e+06	574	lineation, stretch/shape (mylonitic)	quartz stretch parallel to intersection	58	19	SMRFieldNoteDataEntry	none	2149	21	32	19
Suizo	2227	SMR-02-0836	489687	3.61678e+06	574	lineation, stretch/shape (mylonitic)		58	16	SMRFieldNoteDataEntry	none	2149	21	32	16
Suizo	2285	SMR-02-0854	489180	3616040	574	lineation, stretch/shape (mylonitic)	quartz stretch	76	61	SMRFieldNoteDataEntry	none	2149	21	14	61
Suizo	2289	SMR-02-0861	488777	3.61574e+06	574	lineation, stretch/shape (mylonitic)	quartz stretch	59	10	SMRFieldNoteDataEntry	not necessarily in weak shape foliation.	2149	21	31	10
Suizo	2291	SMR-02-0862	488793	3615636	574	lineation, stretch/shape (mylonitic)	quartz stretch	67	36	SMRFieldNoteDataEntry	none	2149	21	23	36
Suizo	2293	SMR-02-0863	488864	3.61554e+06	574	lineation, stretch/shape (mylonitic)	quartz stretch	80	35	SMRFieldNoteDataEntry	none	2149	21	10	35
Suizo	2295	SMR-02-0864	488991	3.61551e+06	574	lineation, stretch/shape (mylonitic)	quartz stretch	65	23	SMRFieldNoteDataEntry	none	2149	21	25	23
Suizo	2297	SMR-02-0865	489115	3.61542e+06	574	lineation, stretch/shape (mylonitic)	quartz stretch parallel to intersection	74	30	SMRFieldNoteDataEntry	none	2149	21	16	30
Suizo	2299	SMR-02-0867	489392	3615425	574	lineation, stretch/shape (mylonitic)	quartz stretch parallel to intersection	69	20	SMRFieldNoteDataEntry	none	2149	21	21	20
Suizo	2301	SMR-02-0869	489645	3615273	574	lineation, stretch/shape (mylonitic)	quartz stretch parallel to intersection	66	41	SMRFieldNoteDataEntry	none	2149	21	24	41
Suizo	2311	SMR-02-0872	490108	3.61509e+06	574	lineation, stretch/shape (mylonitic)	quartz stretch parallel to intersection	59	20	SMRFieldNoteDataEntry	none	2149	21	31	20
Suizo	2521	JES-02-0511	487569	3612472	574	lineation, stretch/shape (mylonitic)		79	30		none	0	21	-349
Suizo	2527	JES-02-0513	487921	3612548	574	lineation, stretch/shape (mylonitic)		77	14	SMRenterJESstructureData	none	0	21	-347
Suizo	2534	JES-02-0514	487888	3612641	574	lineation, stretch/shape (mylonitic)		70	17		none	0	21	-340
Suizo	2541	JES-02-0516	488020	3612691	574	lineation, stretch/shape (mylonitic)		65	19	SMRenterJESstructureData	none	0	21	-335
Suizo	2546	JES-02-0518	487986	3612971	574	lineation, stretch/shape (mylonitic)		69	7	SMRenterJESstructureData	none	0	21	-339
Suizo	2549	JES-02-0519	487902	3613012	574	lineation, stretch/shape (mylonitic)		77	16	SMRenterJESstructureData	none	0	21	-347
Suizo	2554	JES-02-0521	487876	3613185	574	lineation, stretch/shape (mylonitic)		73	23	SMRenterJESstructureData	none	0	21	-343
Suizo	2558	JES-02-0522	487928	3613351	574	lineation, stretch/shape (mylonitic)		72	7	SMRenterJESstructureData	none	0	21	-342
Suizo	2562	JES-02-0523	488008	3613476	574	lineation, stretch/shape (mylonitic)		66	10	SMRenterJESstructureData	none	0	21	-336
Suizo	2565	JES-02-0524	488037	3613607	574	lineation, stretch/shape (mylonitic)		61	25	SMRenterJESstructureData	none	0	21	-331
Suizo	2569	JES-02-0525	488151	3613440	574	lineation, stretch/shape (mylonitic)		69	13	SMRenterJESstructureData	none	0	21	-339
Suizo	2573	JES-02-0526	488194	3613318	574	lineation, stretch/shape (mylonitic)		66	25	SMRenterJESstructureData	none	0	21	-336
Suizo	2576	JES-02-0527	488273	3613180	574	lineation, stretch/shape (mylonitic)		65	18	SMRenterJESstructureData	none	0	21	-335
Suizo	2579	JES-02-0528	488319	3613029	574	lineation, stretch/shape (mylonitic)		67	17	SMRenterJESstructureData	none	0	21	-337
Suizo	2583	JES-02-0529	488251	3612906	574	lineation, stretch/shape (mylonitic)		67	19	SMRenterJESstructureData	none	0	21	-337
Suizo	2586	JES-02-0530	488200	3612768	574	lineation, stretch/shape (mylonitic)		69	8	SMRenterJESstructureData	none	0	21	-339
Suizo	2589	JES-02-0531	487863	3612354	574	lineation, stretch/shape (mylonitic)		72	18	SMRenterJESstructureData	none	0	21	-342
Suizo	2593	JES-02-0532	489273	3617339	574	lineation, stretch/shape (mylonitic)		65	29	SMRenterJESstructureData	none	0	21	-335
Suizo	2596	JES-02-0533	489452	3616964	574	lineation, stretch/shape (mylonitic)		67	47	SMRenterJESstructureData	none	0	21	-337
Suizo	2599	JES-02-0534	489500	3616732	574	lineation, stretch/shape (mylonitic)		73	33	SMRenterJESstructureData	none	0	21	-343
Suizo	2603	JES-02-0536	489716	3616924	574	lineation, stretch/shape (mylonitic)		59	38	SMRenterJESstructureData	none	0	21	-329
Suizo	2607	JES-02-0540	489675	3616769	574	lineation, stretch/shape (mylonitic)		54	29	SMRenterJESstructureData	none	0	21	-324
Suizo	2611	JES-02-0541	489447	3616627	574	lineation, stretch/shape (mylonitic)		64	38	SMRenterJESstructureData	none	0	21	-334
Suizo	2615	JES-02-0542	489304	3616518	574	lineation, stretch/shape (mylonitic)		68	22	SMRenterJESstructureData	none	0	21	-338
Suizo	2618	JES-02-0543	489108	3616349	574	lineation, stretch/shape (mylonitic)		68	32	SMRenterJESstructureData	none	0	21	-338
Suizo	2621	JES-02-0544	489018	3616463	574	lineation, stretch/shape (mylonitic)		64	41	SMRenterJESstructureData	none	0	21	-334
Suizo	2631	JES-02-0545	488910	3616492	574	lineation, stretch/shape (mylonitic)		80	41	SMRenterJESstructureData	none	0	21	-350
Suizo	2634	JES-02-0546	488940	3616650	574	lineation, stretch/shape (mylonitic)		80	49	SMRenterJESstructureData	none	0	21	-350
Suizo	2637	JES-02-0547	489106	3616792	574	lineation, stretch/shape (mylonitic)		53	14	SMRenterJESstructureData	none	0	21	-323
Suizo	2640	JES-02-0548	489154	3616870	574	lineation, stretch/shape (mylonitic)		75	40	SMRenterJESstructureData	none	0	21	-345
Suizo	2646	JES-02-0549	488981	3616881	574	lineation, stretch/shape (mylonitic)		67	30	SMRenterJESstructureData	none	0	21	-337
Suizo	2651	JES-02-0551	489339	3616887	574	lineation, stretch/shape (mylonitic)		72	27	SMRenterJESstructureData	none	0	21	-342
Suizo	2654	JES-02-0552	489527	3617047	574	lineation, stretch/shape (mylonitic)		55	18	SMRenterJESstructureData	none	0	21	-325
Suizo	2660	JES-02-0722	487842	3613945	574	lineation, stretch/shape (mylonitic)		83	17	SMRenterJESstructureData	none	0	21	-353
Suizo	2666	JES-02-0726	488156	3613935	574	lineation, stretch/shape (mylonitic)		63	34	SMRenterJESstructureData	none	0	21	-333
Suizo	2669	JES-02-0727	488354	3613904	574	lineation, stretch/shape (mylonitic)		75	20	SMRenterJESstructureData	none	0	21	-345
Suizo	2672	JES-02-0728	488465	3613832	574	lineation, stretch/shape (mylonitic)		68	19	SMRenterJESstructureData	none	0	21	-338
Suizo	2676	JES-02-0730	488356	3613721	574	lineation, stretch/shape (mylonitic)		55	31	SMRenterJESstructureData	none	0	21	-325
Suizo	2681	JES-02-0732	488340	3613500	574	lineation, stretch/shape (mylonitic)		62	20	SMRenterJESstructureData	none	0	21	-332
Suizo	2684	JES-02-0733	488482	3613540	574	lineation, stretch/shape (mylonitic)		56	17	SMRenterJESstructureData	none	0	21	-326
Suizo	2687	JES-02-0734	488703	3613740	574	lineation, stretch/shape (mylonitic)		60	24	SMRenterJESstructureData	none	0	21	-330
Suizo	2690	JES-02-0735	488788	3613558	574	lineation, stretch/shape (mylonitic)		56	18	SMRenterJESstructureData	none	0	21	-326
Suizo	2693	JES-02-0736	488935	3613817	574	lineation, stretch/shape (mylonitic)		72	30	SMRenterJESstructureData	none	0	21	-342
Suizo	2696	JES-02-0737	488899	3613969	574	lineation, stretch/shape (mylonitic)		58	26	SMRenterJESstructureData	none	0	21	-328
Suizo	2699	JES-02-0738	488739	3613950	574	lineation, stretch/shape (mylonitic)		59	19	SMRenterJESstructureData	none	0	21	-329
Suizo	2702	JES-02-0739	488591	3614130	574	lineation, stretch/shape (mylonitic)		66	32	SMRenterJESstructureData	none	0	21	-336
Suizo	2705	JES-02-0740	488447	3614348	574	lineation, stretch/shape (mylonitic)		70	27	SMRenterJESstructureData	none	0	21	-340
Suizo	2708	JES-02-0741	488328	3614360	574	lineation, stretch/shape (mylonitic)		61	22	SMRenterJESstructureData	none	0	21	-331
Suizo	2711	JES-02-0742	488256	3614336	574	lineation, stretch/shape (mylonitic)		60	14	SMRenterJESstructureData	none	0	21	-330
Suizo	2714	JES-02-0743	488151	3614314	574	lineation, stretch/shape (mylonitic)		47	10	SMRenterJESstructureData	none	0	21	-317
Suizo	33009	SMR-02-1168	487873	3.61539e+06	574	lineation, stretch/shape (mylonitic)	stretching lineation	49	8	SMRChiefButteStructureData	l>>s tectonite	2150	21	-41	8
Suizo	33016	SMR-02-1179	488382	3.61529e+06	574	lineation, stretch/shape (mylonitic)	stretching lineation	66	30	SMRChiefButteStructureData	q stretch	2149	21	-24	30
Suizo	33018	SMR-02-1180	488489	3615097	574	lineation, stretch/shape (mylonitic)	stretching lineation	68	28	SMRChiefButteStructureData	quartz stretch	2149	21	-22	28
Suizo	33020	SMR-02-1182	488538	3614883	574	lineation, stretch/shape (mylonitic)	stretching lineation	67	26	SMRChiefButteStructureData		2149	21	-23	26
Suizo	33022	SMR-02-1185	488652	3614671	574	lineation, stretch/shape (mylonitic)	stretching lineation	71	27	SMRChiefButteStructureData	q stretch	2149	21	-19	27
Suizo	33024	SMR-02-1189	488921	3614763	574	lineation, stretch/shape (mylonitic)	stretching lineation	69	31	SMRChiefButteStructureData	q stretch	2149	21	-21	31
Suizo	33025	SMR-02-1211	489708	3.61484e+06	574	lineation, stretch/shape (mylonitic)	stretching lineation	50	41	SMRChiefButteStructureData	stretch on ptygmatically folded quartz vein	2150	21	-40	41
Suizo	33027	SMR-02-1212	489606	3.61476e+06	574	lineation, stretch/shape (mylonitic)	stretching lineation	61	27	SMRChiefButteStructureData	quartz stretch	2149	21	-29	27
Suizo	33029	SMR-02-1219	489135	3614406	574	lineation, stretch/shape (mylonitic)	stretching lineation	59	18	SMRChiefButteStructureData		2149	21	-31	18
Suizo	33031	SMR-02-1223	488674	3614513	574	lineation, stretch/shape (mylonitic)	stretching lineation	75	25	SMRChiefButteStructureData		2149	21	-15	25
Suizo	33033	SMR-02-1226	488373	3.6145e+06	574	lineation, stretch/shape (mylonitic)	stretching lineation	73	33	SMRChiefButteStructureData		2149	21	-17	33
Suizo	33062	SMR-02-1389	489936	3.61805e+06	574	lineation, stretch/shape (mylonitic)	stretching lineation	61	38	SMRChiefButteStructureData	streaking of feldspar, sparse quartz stretch.	2149	21	-29	38
Suizo	33064	SMR-02-1419	489751	3.61795e+06	574	lineation, stretch/shape (mylonitic)	stretching lineation	58	30	SMRChiefButteStructureData	strong stretching lineation	2149	21	-32	30
DurhamSW	2505	JES-02-0092	485937	3618536	320	Mylonitic foliation, generic	Mylonite, JES	338	43	SMRenterJESstructureData	none	0	21	-248	43
Suizo	2512	JES-02-0510	487468	3612268	320	Mylonitic foliation, generic	Mylonite, JES	49	30	SMRenterJESstructureData	none	0	21	-319	30
Suizo	2520	JES-02-0511	487569	3612472	320	Mylonitic foliation, generic		42	44	SMRenterJESstructureData	none	0	21	-312	44
Suizo	2526	JES-02-0513	487921	3612548	320	Mylonitic foliation, generic	Mylonite, JES	28	18	SMRenterJESstructureData	none	0	21	-298	18
Suizo	2533	JES-02-0514	487888	3612641	320	Mylonitic foliation, generic		328	17		none	0	21	-238	17
Suizo	2540	JES-02-0516	488020	3612691	320	Mylonitic foliation, generic	Mylonite, JES	353	20	SMRenterJESstructureData	none	0	21	-263	20
Suizo	2545	JES-02-0518	487986	3612971	320	Mylonitic foliation, generic	Mylonite, JES	56	28	SMRenterJESstructureData	none	0	21	-326	28
Suizo	2548	JES-02-0519	487902	3613012	320	Mylonitic foliation, generic	Mylonite, JES	8	17	SMRenterJESstructureData	none	0	21	-278	17
Suizo	2553	JES-02-0521	487876	3613185	320	Mylonitic foliation, generic	Mylonite, JES	3	24	SMRenterJESstructureData	none	0	21	-273	24
Suizo	2557	JES-02-0522	487928	3613351	320	Mylonitic foliation, generic	Mylonite, JES	50	19	SMRenterJESstructureData	none	0	21	-320	19
Suizo	2561	JES-02-0523	488008	3613476	320	Mylonitic foliation, generic	Mylonite, JES	47	29	SMRenterJESstructureData	none	0	21	-317	29
Suizo	2564	JES-02-0524	488037	3613607	320	Mylonitic foliation, generic	Mylonite, JES	7	30	SMRenterJESstructureData	none	0	21	-277	30
Suizo	2568	JES-02-0525	488151	3613440	320	Mylonitic foliation, generic	Mylonite, JES	31	21	SMRenterJESstructureData	none	0	21	-301	21
Suizo	2572	JES-02-0526	488194	3613318	320	Mylonitic foliation, generic	Mylonite, JES	14	31	SMRenterJESstructureData	none	0	21	-284	31
Suizo	2575	JES-02-0527	488273	3613180	320	Mylonitic foliation, generic	Mylonite, JES	0	20	SMRenterJESstructureData	none	0	21	270	20
Suizo	2578	JES-02-0528	488319	3613029	320	Mylonitic foliation, generic	Mylonite, JES	7	20	SMRenterJESstructureData	none	0	21	-277	20
Suizo	2582	JES-02-0529	488251	3612906	320	Mylonitic foliation, generic	Mylonite, JES	21	26	SMRenterJESstructureData	none	0	21	-291	26
Suizo	2585	JES-02-0530	488200	3612768	320	Mylonitic foliation, generic	Mylonite, JES	27	12	SMRenterJESstructureData	none	0	21	-297	12
Suizo	2588	JES-02-0531	487863	3612354	320	Mylonitic foliation, generic	Mylonite, JES	37	29	SMRenterJESstructureData	none	0	21	-307	29
Suizo	2592	JES-02-0532	489273	3617339	320	Mylonitic foliation, generic	Mylonite, JES	319	30	SMRenterJESstructureData	none	0	21	-229	30
Suizo	2595	JES-02-0533	489452	3616964	320	Mylonitic foliation, generic	Mylonite, JES	327	47	SMRenterJESstructureData	none	0	21	-237	47
Suizo	2598	JES-02-0534	489500	3616732	320	Mylonitic foliation, generic	Mylonite, JES	10	36	SMRenterJESstructureData	none	0	21	-280	36
Suizo	2602	JES-02-0536	489716	3616924	320	Mylonitic foliation, generic	Mylonite, JES	1	43	SMRenterJESstructureData	none	0	21	-271	43
Suizo	2606	JES-02-0540	489675	3616769	320	Mylonitic foliation, generic	Mylonite, JES	343	30	SMRenterJESstructureData	none	0	21	-253	30
Suizo	2610	JES-02-0541	489447	3616627	320	Mylonitic foliation, generic	Mylonite, JES	4	42	SMRenterJESstructureData	none	0	21	-274	42
Suizo	2614	JES-02-0542	489304	3616518	320	Mylonitic foliation, generic	Mylonite, JES	356	23	SMRenterJESstructureData	none	0	21	-266	23
Suizo	2617	JES-02-0543	489108	3616349	320	Mylonitic foliation, generic	Mylonite, JES	3	35	SMRenterJESstructureData	none	0	21	-273	35
Suizo	2620	JES-02-0544	489018	3616463	320	Mylonitic foliation, generic	Mylonite, JES	352	42	SMRenterJESstructureData	none	0	21	-262	42
Suizo	2630	JES-02-0545	488910	3616492	320	Mylonitic foliation, generic	Mylonite, JES	6	42	SMRenterJESstructureData	none	0	21	-276	42
Suizo	2633	JES-02-0546	488940	3616650	320	Mylonitic foliation, generic	Mylonite, JES	23	54	SMRenterJESstructureData	none	0	21	-293	54
Suizo	2636	JES-02-0547	489106	3616792	320	Mylonitic foliation, generic	Mylonite, JES	40	48	SMRenterJESstructureData	none	0	21	-310	48
Suizo	2639	JES-02-0548	489154	3616870	320	Mylonitic foliation, generic	Mylonite, JES	13	44	SMRenterJESstructureData	none	0	21	-283	44
Suizo	2645	JES-02-0549	488981	3616881	320	Mylonitic foliation, generic	Mylonite, JES	323	31	SMRenterJESstructureData	none	0	21	-233	31
Suizo	2648	JES-02-0550	489171	3617041	320	Mylonitic foliation, generic	Mylonite, JES	337	36	SMRenterJESstructureData	none	0	21	-247	36
Suizo	2650	JES-02-0551	489339	3616887	320	Mylonitic foliation, generic	Mylonite, JES	345	27	SMRenterJESstructureData	none	0	21	-255	27
Suizo	2653	JES-02-0552	489527	3617047	320	Mylonitic foliation, generic	Mylonite, JES	349	20	SMRenterJESstructureData	none	0	21	-259	20
Suizo	2659	JES-02-0722	487842	3613945	320	Mylonitic foliation, generic	Mylonite, JES	348	17	SMRenterJESstructureData	none	0	21	-258	17
Suizo	2665	JES-02-0726	488156	3613935	320	Mylonitic foliation, generic	Mylonite, JES	0	37	SMRenterJESstructureData	none	0	21	270	37
Suizo	2668	JES-02-0727	488354	3613904	320	Mylonitic foliation, generic	Mylonite, JES	25	26	SMRenterJESstructureData	none	0	21	-295	26
Suizo	2671	JES-02-0728	488465	3613832	320	Mylonitic foliation, generic	Mylonite, JES	29	28	SMRenterJESstructureData	none	0	21	-299	28
Suizo	2675	JES-02-0730	488356	3613721	320	Mylonitic foliation, generic	Mylonite, JES	3	37	SMRenterJESstructureData	none	0	21	-273	37
Suizo	2680	JES-02-0732	488340	3613500	320	Mylonitic foliation, generic	Mylonite, JES	15	26	SMRenterJESstructureData	none	0	21	-285	26
Suizo	2683	JES-02-0733	488482	3613540	320	Mylonitic foliation, generic	Mylonite, JES	29	34	SMRenterJESstructureData	none	0	21	-299	34
Suizo	2686	JES-02-0734	488703	3613740	320	Mylonitic foliation, generic	Mylonite, JES	16	33	SMRenterJESstructureData	none	0	21	-286	33
Suizo	2689	JES-02-0735	488788	3613558	320	Mylonitic foliation, generic	Mylonite, JES	32	38	SMRenterJESstructureData	none	0	21	-302	38
Suizo	2692	JES-02-0736	488935	3613817	320	Mylonitic foliation, generic	Mylonite, JES	4	32	SMRenterJESstructureData	none	0	21	-274	32
Suizo	2695	JES-02-0737	488899	3613969	320	Mylonitic foliation, generic	Mylonite, JES	18	37	SMRenterJESstructureData	none	0	21	-288	37
Suizo	2698	JES-02-0738	488739	3613950	320	Mylonitic foliation, generic	Mylonite, JES	343	20	SMRenterJESstructureData	none	0	21	-253	20
Suizo	2701	JES-02-0739	488591	3614130	320	Mylonitic foliation, generic	Mylonite, JES	354	33	SMRenterJESstructureData	none	0	21	-264	33
Suizo	2704	JES-02-0740	488447	3614348	320	Mylonitic foliation, generic	Mylonite, JES	357	28	SMRenterJESstructureData	none	0	21	-267	28
Suizo	2707	JES-02-0741	488328	3614360	320	Mylonitic foliation, generic	Mylonite, JES	10	28	SMRenterJESstructureData	none	0	21	-280	28
Suizo	2710	JES-02-0742	488256	3614336	320	Mylonitic foliation, generic	Mylonite, JES	32	28	SMRenterJESstructureData	none	0	21	-302	28
Suizo	2713	JES-02-0743	488151	3614314	320	Mylonitic foliation, generic	Mylonite, JES	29	30	SMRenterJESstructureData	none	0	21	-299	30
DurhamNE	77	SMR-02-0147	486459	3.62345e+06	561	Mylonitic foliation, mylonite		307	85	SMRFieldNoteDataEntry	20 cm thick medium greenish gray mylonite to ultramylonite shear band.	2122	21	323	85
DurhamNE	78	SMR-02-0148	486406	3.62336e+06	561	Mylonitic foliation, mylonite		321	68	SMRFieldNoteDataEntry	deflection of foliation into mylonite zones (Ramsay-Graham geometry)	2122	21	309	68
DurhamNE	80	SMR-02-0150	486385	3.62324e+06	561	Mylonitic foliation, mylonite		350	52	SMRFieldNoteDataEntry	0.5 m thick mylonite band in equigranular medium fine-graind dio/gd	2122	21	280	52
DurhamNE	94	SMR-02-0163	486748	3622601	561	Mylonitic foliation, mylonite		331	65	SMRFieldNoteDataEntry	mylonitic folliation in aplite dike; sense of shear from s-c fabric	2122	21	299	65
DurhamSW	11	SMR-02-0003	486317	3.62115e+06	561	Mylonitic foliation, mylonite		340	65	SMRFieldNoteDataEntry	none	2122	21	290	65
DurhamSW	98	SMR-02-0257	486134	3.62001e+06	561	Mylonitic foliation, mylonite	mylonitic foliation in aplite	344	52	SMRFieldNoteDataEntry	mylonitic foliation in aplite dike	2122	21	286	52
DurhamSW	1095	SMR-02-0236	486030	3.62046e+06	561	Mylonitic foliation, mylonite	mylonitic foliation in aplite	348	51	SMRFieldNoteDataEntry	none	2122	21	282	51
DurhamSW	1126	SMR-02-0275	486896	3.62e+06	561	Mylonitic foliation, mylonite		336	43	SMRFieldNoteDataEntry	none	2122	21	294	43
DurhamSW	1128	SMR-02-0276	486842	3.62016e+06	561	Mylonitic foliation, mylonite		327	58	SMRFieldNoteDataEntry	none	2122	21	303	58
DurhamSW	1136	SMR-02-0281	486719	3620182	561	Mylonitic foliation, mylonite		334	55	SMRFieldNoteDataEntry	none	2122	21	296	55
DurhamSW	1142	SMR-02-0289	486879	3619769	561	Mylonitic foliation, mylonite		344	59	SMRFieldNoteDataEntry	none	2122	21	286	59
DurhamSW	1254	SMR-02-0525	484875	3617160	561	Mylonitic foliation, mylonite		358	35	SMRFieldNoteDataEntry	none	2122	21	272	35
DurhamSW	1272	SMR-02-0533	484999	3.61775e+06	561	Mylonitic foliation, mylonite		8	49	SMRFieldNoteDataEntry	1.5 meter thick band.	2122	21	262	49
Suizo	1420	SMR-02-0631	487429	3.61164e+06	561	Mylonitic foliation, mylonite	transposed laminated diff in Pinal	335	23	SMR_fieldData0618		2122	21	295	23
Suizo	1424	SMR-02-0632	487242	3.61157e+06	561	Mylonitic foliation, mylonite		27	23	SMR_fieldData0618	foliation is curviplanar. Measure in transposed quartz vein or quartz-rich leucogranite.	2122	21	243	23
Suizo	1430	SMR-02-0641	487122	3611695	561	Mylonitic foliation, mylonite		3	28	SMRFieldNoteDataEntry	mylonitic foliation in Pinal schist sheed in leucogranite/pegmatite. Fabric domainal, weak to strong.	2122	21	267	28
Suizo	1434	SMR-02-0643	487219	3.61197e+06	561	Mylonitic foliation, mylonite	transposed laminated diff in Pinal	345	22	SMR_fieldData0618	isoclinally folded laminated differentiated foliation in Pinal Schist, mylonitic fol is axial surface to folds.	2122	21	285	22
Suizo	1444	SMR-02-0645	487365	3.61232e+06	561	Mylonitic foliation, mylonite	transposed laminated diff in Pinal	40	14	SMR_fieldData0618		2122	21	230	14
Suizo	1447	SMR-02-0646	487467	3612514	561	Mylonitic foliation, mylonite	transposed laminated diff in Pinal	24	37	SMR_fieldData0618	long limbs in transposed compositional laminated in Pinal schist. Leucogranite mostly weakly foliated.	2122	21	246	37
Suizo	1454	SMR-02-0663	487763	3613437	561	Mylonitic foliation, mylonite	transposed laminated diff in Pinal	41	12	SMRFieldNoteDataEntry	leucogranite layers have same mylonitic foliation.	2122	21	229	12
Suizo	1459	SMR-02-0666	487894	3.61338e+06	561	Mylonitic foliation, mylonite		40	29	SMR_fieldData0618		2122	21	230	29
Suizo	1474	SMR-02-0676	489223	3.61743e+06	561	Mylonitic foliation, mylonite		336	27	SMR_fieldNotes0619	none	2122	21	294	27
Suizo	1482	SMR-02-0680	489135	3.61759e+06	561	Mylonitic foliation, mylonite		27	70	SMR_fieldNotes0619	none	2122	21	243	70
Suizo	1486	SMR-02-0695	489028	3.61741e+06	561	Mylonitic foliation, mylonite		25	31	SMR_fieldNotes0619	none	2122	21	245	31
Suizo	1502	SMR-02-0698	488996	3.6172e+06	561	Mylonitic foliation, mylonite		358	29	SMR_fieldNotes0619	curviplanar	2122	21	272	29
Suizo	2226	SMR-02-0836	489687	3.61678e+06	561	Mylonitic foliation, mylonite		334	16	SMRFieldNoteDataEntry	none	2122	21	296	16
Suizo	2294	SMR-02-0864	488991	3.61551e+06	561	Mylonitic foliation, mylonite	mylonite	25	34	SMRFieldNoteDataEntry	none	2122	21	245	34
Suizo	2296	SMR-02-0865	489115	3.61542e+06	561	Mylonitic foliation, mylonite	transposed laminated diff in Pinal	31	40	SMRFieldNoteDataEntry	none	2122	21	239	40
Suizo	33061	SMR-02-1389	489936	3.61805e+06	561	Mylonitic foliation, mylonite	mylonite	339	38	SMRChiefButteStructureData		2122	21	111	38
Suizo	33063	SMR-02-1419	489751	3.61795e+06	561	Mylonitic foliation, mylonite	mylonite	334	30	SMRChiefButteStructureData	mylonitic Pinal(?), gray, dull, very fine-grained.	2122	21	116	30
DurhamNE	84	SMR-02-0157	486559	3622957	560	Mylonitic foliation, protomylonite		359	54	SMRFieldNoteDataEntry	moderate to weak protomylonite	2120	21	271	54
DurhamNE	85	SMR-02-0158	486643	3622883	560	Mylonitic foliation, protomylonite		334	45	SMRFieldNoteDataEntry	weak to moderate protomylonite in pgd; flattened medium gray (d/gd?) enclaves, aligned K-feldspar phenocrysts; K-feldspar phenocrysts are cracked; flattened quartz grains. Measures about 10 m from d/gd contact.	2120	21	296	45
DurhamSW	1132	SMR-02-0277	486820	3620158	560	Mylonitic foliation, protomylonite		335	53	SMRFieldNoteDataEntry	none	2120	21	295	53
DurhamNE	65	SMR-02-0137	487368	3.62204e+06	824	Mylonitic foliation, weak grain shape fabric		345	63	SMRFieldNoteDataEntry	aligned biotite clots, slightly flattened Quartz, aligned K-feldspar	2122	21	285	63
DurhamNE	1036	SMR-02-0192	487045	3621582	824	Mylonitic foliation, weak grain shape fabric		350	43	SMRFieldNoteDataEntry	Ksp alignment, quartz slightly flattened, quasi penetrative	2122	21	280	43
DurhamNE	1038	SMR-02-0196	487185	3.62183e+06	824	Mylonitic foliation, weak grain shape fabric		342	41	SMRFieldNoteDataEntry	none	2122	21	288	41
DurhamSW	13	SMR-02-0004	486150	3.62114e+06	824	Mylonitic foliation, weak grain shape fabric		346	53	SMRFieldNoteDataEntry	none	2122	21	284	53
DurhamSW	15	SMR-02-0007	486004	3.62106e+06	824	Mylonitic foliation, weak grain shape fabric		355	47	SMRFieldNoteDataEntry	Aligned K-feldspar, quartz shape	2122	21	275	47
DurhamSW	26	SMR-02-0014	485817	3.62104e+06	824	Mylonitic foliation, weak grain shape fabric		358	45	SMRFieldNoteDataEntry	schistosity, weak flattening of quartz, schistosity component of discrete s-c developed in granitoid	2122	21	272	45
DurhamSW	36	SMR-02-0026	485391	3.62125e+06	824	Mylonitic foliation, weak grain shape fabric		312	33	SMRFieldNoteDataEntry	none	2122	21	318	33
DurhamSW	39	SMR-02-0029	485332	3.62119e+06	824	Mylonitic foliation, weak grain shape fabric		336	31	SMRFieldNoteDataEntry	k-feldspar alignment, flattened enclaves.	2122	21	294	31
DurhamSW	1058	SMR-02-0200	485690	3.61949e+06	824	Mylonitic foliation, weak grain shape fabric		312	45	SMRFieldNoteDataEntry	approximate measurement, flattened enclaves, aligned potassium feldspar phenocrysts, at contact with diorite-granodiorite unit	2122	21	318	45
DurhamSW	1082	SMR-02-0222	485390	3620233	824	Mylonitic foliation, weak grain shape fabric		337	70	SMRFieldNoteDataEntry	none	2122	21	293	70
DurhamSW	1087	SMR-02-0228	485856	3620333	824	Mylonitic foliation, weak grain shape fabric		352	38	SMRFieldNoteDataEntry	porphyritic granodiorite ranges from non foliated to sparse, 20 cm thick moderately foliated zones.	2122	21	278	38
DurhamSW	1103	SMR-02-0242	486328	3620538	824	Mylonitic foliation, weak grain shape fabric	weak shape	346	55	SMRFieldNoteDataEntry	aligned potassium feldspar, aligned biotite clots, slightly flattened quartz.	2122	21	284	55
DurhamSW	1107	SMR-02-0249	486558	3620256	824	Mylonitic foliation, weak grain shape fabric	weak-moderate protomylonite	352	40	SMRFieldNoteDataEntry	none	2122	21	278	40
DurhamSW	1110	SMR-02-0249	486558	3620256	824	Mylonitic foliation, weak grain shape fabric		340	40	SMRFieldNoteDataEntry	none	2122	21	290	40
DurhamSW	1117	SMR-02-0256	486182	3.61999e+06	824	Mylonitic foliation, weak grain shape fabric	weak shape	2	46	SMRFieldNoteDataEntry	none	2122	21	268	46
DurhamSW	1149	SMR-02-0299	486485	3.61963e+06	824	Mylonitic foliation, weak grain shape fabric	weak shape	0	50	SMRFieldNoteDataEntry	aligned potassium feldspar, weak quartz shape.	2122	21	270	50
DurhamSW	1160	SMR-02-0348	486037	3.61903e+06	824	Mylonitic foliation, weak grain shape fabric		10	37	SMRFieldNoteDataEntry	none	2122	21	260	37
DurhamSW	1279	SMR-02-0538	485411	3.61804e+06	824	Mylonitic foliation, weak grain shape fabric	weak to moderate shape	350	33	SMRFieldNoteDataEntry	weak to moderate protomylonite, in 1 meter thick band.	2122	21	280	33
Suizo	2287	SMR-02-0860	488723	3.61582e+06	824	Mylonitic foliation, weak grain shape fabric	weak shape	47	57	SMRFieldNoteDataEntry	surface defined by flattened quartz in moderate protomylonitic leucogranite. Foliation is domainal, very weak to moderate.	2122	21	223	57
DurhamNE	75	SMR-02-0146	486465	3.62359e+06	559	Mylonitic foliation, well developed s-tectonite foliation		330	60	SMRFieldNoteDataEntry	zone 1 m thick in granodiorite	2120	21	300	60
DurhamNE	83	SMR-02-0156	486584	3.62296e+06	559	Mylonitic foliation, well developed s-tectonite foliation		326	65	SMRFieldNoteDataEntry		2120	21	304	65
DurhamSW	1	SMR-02-0002	486416	3.62113e+06	559	Mylonitic foliation, well developed s-tectonite foliation		354	35	SMRFieldNoteDataEntry	none	2120	21	276	35
DurhamSW	27	SMR-02-0018	485816	3621102	559	Mylonitic foliation, well developed s-tectonite foliation		328	51	SMRFieldNoteDataEntry	measurement in top of spgd dike (see station 17), at contact with biotite granodiorite, zone of intensified fabric.	2120	21	302	51
DurhamSW	1220	SMR-02-0509	485624	3.61767e+06	559	Mylonitic foliation, well developed s-tectonite foliation		11	38	SMRFieldNoteDataEntry	none	2120	21	259	38
DurhamSW	1223	SMR-02-0510	485629	3.61758e+06	559	Mylonitic foliation, well developed s-tectonite foliation		10	45	SMRFieldNoteDataEntry	none	2120	21	260	45
DurhamSW	1229	SMR-02-0513	485528	3.61747e+06	559	Mylonitic foliation, well developed s-tectonite foliation		50	55	SMRFieldNoteDataEntry	none	2120	21	220	55
DurhamSW	1259	SMR-02-0526	484809	3.61718e+06	559	Mylonitic foliation, well developed s-tectonite foliation		336	48	SMRFieldNoteDataEntry	none	2120	21	294	48
DurhamSW	1269	SMR-02-0528	484869	3.61732e+06	559	Mylonitic foliation, well developed s-tectonite foliation		352	60	SMRFieldNoteDataEntry	in mylonitic ledge about 15 meter thick	2120	21	278	60
Suizo	62	SMR-02-0101	489606	3614393	559	Mylonitic foliation, well developed s-tectonite foliation		23	30	SMRFieldNoteDataEntry	quartz has Tertiary mylonite greasy look	2120	21	247	30
Suizo	1405	SMR-02-0618	487879	3611955	559	Mylonitic foliation, well developed s-tectonite foliation	transposed laminated diff in Pinal	9	40	SMR_fieldData0618	fabric appears to be Tertiary mylonite based on greasy-looking quartz, can not see lineation clearly because rock has too much mica	2120	21	261	40
Suizo	1411	SMR-02-0621	487758	3611895	559	Mylonitic foliation, well developed s-tectonite foliation	transposed laminated diff in Pinal	356	32	SMR_fieldData0618	lineation is quartz stretch in transposed quartz veins. Rock quite micaceous, little apparent TRIG. Dominant foliation clearly transposes old cm-scale laminated differentiated foliation	2120	21	274	32
Suizo	1418	SMR-02-0630	487577	3611670	559	Mylonitic foliation, well developed s-tectonite foliation		357	38	SMRFieldNoteDataEntry	quartz stretch in transposed quartz vein in speckled granodiorite.	2120	21	273	38
Suizo	1438	SMR-02-0639	486996	3.61148e+06	559	Mylonitic foliation, well developed s-tectonite foliation	moderate protomylonitie	346	38	SMR_fieldData0618	none	2120	21	284	38
Suizo	1464	SMR-02-0668	487991	3613429	559	Mylonitic foliation, well developed s-tectonite foliation	moderate protomylonitie	334	16	SMR_fieldData0618	Thin mylonitic shears cut across this fabric with strong 068 stretch lineation.	2120	21	296	16
Suizo	1468	SMR-02-0669	488040	3.61333e+06	559	Mylonitic foliation, well developed s-tectonite foliation	moderate protomylonitie	57	24	SMRFieldNoteDataEntry		2120	21	213	24
Suizo	1472	SMR-02-0671	487760	3.61311e+06	559	Mylonitic foliation, well developed s-tectonite foliation	moderate protomylonitie	29	14	SMRFieldNoteDataEntry		2120	21	241	14
Suizo	2173	SMR-02-0803	490331	3.61537e+06	559	Mylonitic foliation, well developed s-tectonite foliation	strong protomylonite band	34	43	SMRFieldNoteDataEntry	schistosity is parallel to mylonitic foliation.	2120	21	236	43
Suizo	2176	SMR-02-0804	490135	3.61541e+06	559	Mylonitic foliation, well developed s-tectonite foliation		15	20	SMRFieldNoteDataEntry	none	2120	21	255	20
Suizo	2290	SMR-02-0862	488793	3615636	559	Mylonitic foliation, well developed s-tectonite foliation	moderate to strong protomylonite	14	42	SMRFieldNoteDataEntry	none	2120	21	256	42
Suizo	33017	SMR-02-1180	488489	3615097	559	Mylonitic foliation, well developed s-tectonite foliation	mod-strong pr my	8	32	SMRChiefButteStructureData	in leucogranite layer in Xp/lg	2120	21	82	32
Suizo	33019	SMR-02-1182	488538	3614883	559	Mylonitic foliation, well developed s-tectonite foliation	mod-strong pr my	353	27	SMRChiefButteStructureData	in leucogranite/pegmatite	2120	21	97	27
Suizo	33032	SMR-02-1226	488373	3.6145e+06	559	Mylonitic foliation, well developed s-tectonite foliation	mod-strong pr my	5	35	SMRChiefButteStructureData	in medium-fine grained leucogranite; leucogranite>Pinal schist	2120	21	85	35

## Sheet: Table S5. SE Catalina lin
StationId	ID	Lat	Long	UtmN	UtmE	UtmDatum	DateVisited	area	StationID	Trend (strike)	Trend normalized to NE quadrant	Plunge (dip)	plunge mod	Type	type 2	Shear sense	distance from arch axis (m)
JES-05-271	JES-05-271	32.306	-110.748	3.57438e+06	523732		2005-01-28	Soldier Cyn, lower, west ridge	JES-05-271	247	67	10	10	lineation mylonitic stretch shape directed Description		SW	-2190.75
JES-04-782	JES-04-782	32.3055	-110.744	3.57433e+06	524058		2004-04-19	Lower Mt. Lemmon Hwy	JES-04-782	250	70	18	18	sld, stretching lineation, directed down-plunge		SW	-2187.05
JES-05-293	JES-05-293	32.3073	-110.753	3.57453e+06	523275		2005-01-28	Soldier Cyn, lower, west ridge	JES-05-293	244	64	9	9	lineation mylonitic stretch shape directed Description		SW	-2123.44
JES-04-774	JES-04-774	32.3086	-110.74	3.57467e+06	524481		2004-04-19	Lower Mt. Lemmon Hwy	JES-04-774	243	63	9	9	sld, stretching lineation, directed down-plunge		SW	-1780.08
JES-04-771	JES-04-771	32.3088	-110.737	3.57469e+06	524714		2004-04-19	Lower Mt. Lemmon Hwy	JES-04-771	246	66	10	10	sld, stretching lineation, directed down-plunge		SW	-1715.98
JES-05-085	JES-05-085	32.306	-110.714	3.57439e+06	526971		2004-11-10	lower Molino Cyn	JES-05-085	237	57	4	4	lineation mylonitic stretch shape directed Description		SW	-1637.28
JES-05-291	JES-05-291	32.3125	-110.753	3.57511e+06	523280		2005-01-28	Soldier Cyn, lower, west ridge	JES-05-291	243	63	9	9	lineation mylonitic stretch shape directed Description		SW	-1544.6
JES-05-329	JES-05-329	32.3207	-110.807	3.576e+06	518182		2005-02-03	Sabino Cyn, phoneline trail	JES-05-329	240	60	18	18	lineation stretch shape mylonitic Description		SW	-1508.01
JES-05-327	JES-05-327	32.3215	-110.807	3.57609e+06	518208		2005-02-03	Sabino Cyn, phoneline trail	JES-05-327	243	63	14	14	lineation mylonitic stretch shape directed Description		SW	-1410.65
JES-04-803	JES-04-803	32.3093	-110.719	3.57476e+06	526492		2004-04-23	Babad Do'ag - Hwy NE	JES-04-803	245	65	2	2	ml, Mineral lineation, plunging		SW	-1353.65
JES-05-089	JES-05-089	32.3082	-110.711	3.57464e+06	527248		2004-11-10	lower Molino Cyn	JES-05-089	243	63	2	2	lineation mylonitic stretch shape directed Description		SW	-1348.8
JES-05-088	JES-05-088	32.3083	-110.711	3.57465e+06	527246		2004-11-10	lower Molino Cyn	JES-05-088	244	64	7	7	lineation mylonitic stretch shape directed Description		SW	-1338.13
JES-04-797	JES-04-797	32.3108	-110.725	3.57492e+06	525864		2004-04-23	Babad Do'ag - Hwy NE	JES-04-797	247	67	11	11	sld, stretching lineation, directed down-plunge		SW	-1296.02
JES-05-236	JES-05-236	32.3101	-110.719	3.57485e+06	526478		2005-01-25	Babad Do'ag N	JES-05-236	242	62	9	9	lineation mylonitic stretch shape directed Description		SW	-1267
JES-04-787	JES-04-787	32.3107	-110.721	3.57491e+06	526293		2004-04-23	Babad Do'ag - Hwy NE	JES-04-787	245	65	22	22	sld, stretching lineation, directed down-plunge		SW	-1239.04
JES-05-240	JES-05-240	32.3124	-110.718	3.5751e+06	526585		2005-01-25	Babad Do'ag N	JES-05-240	245	65	8	8	lineation stretch shape mylonitic Description		SW	-999.041
JES-04-809	JES-04-809	32.3121	-110.712	3.57507e+06	527101		2004-04-23	Babad Do'ag - Hwy NE	JES-04-809	250	70	2	2	sld, stretching lineation, directed down-plunge	Top-SW shear sense. lineation trend was measured at station 297 (JES-04-808)	SW	-938.461
JES-05-188	JES-05-188	32.3167	-110.742	3.57558e+06	524279		2004-12-30	Lower Soldier Cyn	JES-05-188	237	57	3	3	lineation stretch shape mylonitic Description		SW	-907.969
JES-05-096	JES-05-096	32.3121	-110.709	3.57507e+06	527394		2004-11-10	lower Molino Cyn	JES-05-096	251	71	10	10	lineation stretch shape mylonitic Description		SW	-887.298
JES-05-324	JES-05-324	32.3255	-110.799	3.57654e+06	518904		2005-02-03	Sabino Cyn, phoneline trail	JES-05-324	246	66	18	18	lineation mylonitic stretch shape directed Description		SW	-848.869
JES-05-190	JES-05-190	32.3145	-110.717	3.57534e+06	526602		2004-12-31	Lower Soldier Cyn	JES-05-190	246	66	12	12	lineation stretch shape mylonitic Description		SW	-757.187
JES-05-242	JES-05-242	32.3148	-110.718	3.57537e+06	526531		2005-01-25	Babad Do'ag N	JES-05-242	246	66	8	8	lineation stretch shape mylonitic Description		SW	-735.1
JES-05-100	JES-05-100	32.3138	-110.709	3.57526e+06	527384		2004-11-10	lower Molino Cyn	JES-05-100	60	60	8	-8	lineation mylonitic stretch shape directed Description		SW	-706.975
JES-05-243	JES-05-243	32.3152	-110.717	3.5754e+06	526650		2005-01-25	Babad Do'ag N	JES-05-243	252	72	11	11	lineation mylonitic stretch shape directed Description		SW	-681.133
JES-05-102	JES-05-102	32.3149	-110.709	3.57538e+06	527396		2004-11-10	lower Molino Cyn	JES-05-102	245	65	2	2	lineation mylonitic stretch shape directed Description		SW	-582.96
JES-04-812	JES-04-812	32.3157	-110.711	3.57547e+06	527219		2004-04-23	Babad Do'ag - Hwy NE	JES-04-812	246	66	8	8	sld, stretching lineation, directed down-plunge		SW	-521.659
JES-04-811	JES-04-811	32.3158	-110.711	3.57548e+06	527177		2004-04-23	Babad Do'ag - Hwy NE	JES-04-811	246	66	12	12	ml, Mineral lineation, plunging	Top-SW shear sense from road cut 20 m to northeast (not plotted as foliation not measured)	SW	-520.707
JES-05-103	JES-05-103	32.3163	-110.709	3.57553e+06	527384		2004-11-10	lower Molino Cyn	JES-05-103	248	68	6	6	lineation mylonitic stretch shape directed Description		SW	-433.974
JES-05-248	JES-05-248	32.3176	-110.715	3.57568e+06	526861		2005-01-25	Babad Do'ag N	JES-05-248	248	68	0	0	lineation stretch shape mylonitic Description		SW	-370.728
JES-05-246	JES-05-246	32.3176	-110.714	3.57568e+06	526930		2005-01-25	Babad Do'ag N	JES-05-246	252	72	7	7	lineation stretch shape mylonitic Description		NE	-358.15
JES-05-224	JES-05-224	32.3252	-110.76	3.57651e+06	522636		2005-01-20	Gibbon Mtn SW	JES-05-224	63	63	3	-3	lineation stretch shape mylonitic Description		SW	-250.661
JES-05-223	JES-05-223	32.3252	-110.759	3.57651e+06	522695		2005-01-20	Gibbon Mtn SW	JES-05-223	239	59	3	3	lineation stretch shape mylonitic Description		SW	-240.761
JES-05-463	JES-05-463	32.3314	-110.801	3.57718e+06	518719		2005-02-27	Sabino Cyn, west side	JES-05-463	245	65	9	9	lineation mylonitic stretch shape directed Description		SW	-233.908
JES-05-172	JES-05-172	32.3248	-110.746	3.57647e+06	523918		2004-12-27	Gibbon Mtn SE	JES-05-172	247	67	7	7	lineation stretch shape mylonitic Description		SW	-75.5427
JES-05-220	JES-05-220	32.3275	-110.759	3.57677e+06	522699		2005-01-20	Gibbon Mtn SW	JES-05-220	243	63	2	2	lineation stretch shape mylonitic Description		SW	17.9088	53 shear-sense indicators north of Forerange Arch axis
JES-05-258	JES-05-258	32.322	-110.719	3.57616e+06	526457		2005-01-25	Babad Do'ag N	JES-05-258	246	66	6	6	lineation mylonitic stretch shape directed Description		SW	40.4859
JES-04-835	JES-04-835	32.322	-110.706	3.57617e+06	527674		2004-04-28	Molino Canyon - middle	JES-04-835	56	56	11	-11	sld, stretching lineation, directed down-plunge		NE	252.69
JES-05-256	JES-05-256	32.3231	-110.711	3.57629e+06	527156		2005-01-25	Babad Do'ag N	JES-05-256	241	61	4	4	lineation stretch shape mylonitic Description		SW	285.774
JES-04-821	JES-04-821	32.3228	-110.707	3.57625e+06	527624		2004-04-23	Babad Do'ag - Hwy NE	JES-04-821	57	57	5	-5	sld, stretching lineation, directed down-plunge		NE	328.301
JES-05-217	JES-05-217	32.3298	-110.754	3.57702e+06	523124		2005-01-20	Gibbon Mtn SW	JES-05-217	64	64	2	-2	lineation stretch shape mylonitic Description		SW	343.222
JES-05-177	JES-05-177	32.3287	-110.746	3.5769e+06	523930		2004-12-27	Gibbon Mtn SE	JES-05-177	58	58	1	-1	lineation mylonitic stretch shape directed Description		SW	358.464
JES-05-176	JES-05-176	32.3289	-110.746	3.57692e+06	523928		2004-12-27	Gibbon Mtn SE	JES-05-176	63	63	0	0	lineation mylonitic stretch shape directed Description		NE	377.128
JES-05-128	JES-05-128	32.3274	-110.733	3.57676e+06	525171		2004-12-13	Middle Soldier Canyon	JES-05-128	58	58	8	-8	lineation stretch shape mylonitic Description		SW	428.697
JES-04-833	JES-04-833	32.3241	-110.705	3.5764e+06	527748		2004-04-28	Molino Canyon - middle	JES-04-833	53	53	10	-10	sld, stretching lineation, directed down-plunge		NE	495.108
JES-05-169	JES-05-169	32.3304	-110.744	3.57709e+06	524053		2004-12-27	Gibbon Mtn SE	JES-05-169	60	60	1	-1	lineation mylonitic stretch shape directed Description		NE	569.103	43 indicators more than 500m north of arch axis, two of which are top SW
JES-04-829	JES-04-829	32.3251	-110.703	3.57651e+06	527912		2004-04-28	Molino Canyon - middle	JES-04-829	55	55	13	-13	sld, stretching lineation, directed down-plunge		NE	632.621
JES-04-826	JES-04-826	32.3258	-110.704	3.57658e+06	527813		2004-04-23	Babad Do'ag - Hwy NE	JES-04-826	62	62	20	-20	sld, stretching lineation, directed down-plunge		NE	692.009
JES-05-168	JES-05-168	32.3318	-110.745	3.57724e+06	524042		2004-12-27	Gibbon Mtn SE	JES-05-168	60	60	0	0	lineation mylonitic stretch shape directed Description		NE	715.256
JES-05-124	JES-05-124	32.3308	-110.729	3.57713e+06	525485		2004-12-13	Middle Soldier Canyon	JES-05-124	65	65	10	-10	lineation mylonitic stretch shape directed Description		NE	853.385
JES-05-117	JES-05-117	32.3306	-110.728	3.57711e+06	525638		2004-12-13	Middle Soldier Canyon	JES-05-117	61	61	9	-9	lineation stretch shape mylonitic Description		NE	859.057
JES-05-119	JES-05-119	32.3307	-110.727	3.57712e+06	525697		2004-12-13	Middle Soldier Canyon	JES-05-119	60	60	9	-9	lineation mylonitic stretch shape directed Description		NE	877.957
JES-05-116	JES-05-116	32.3312	-110.728	3.57718e+06	525600		2004-12-13	Middle Soldier Canyon	JES-05-116	59	59	14	-14	lineation stretch shape mylonitic Description		NE	917.681
JES-05-121	JES-05-121	32.3316	-110.728	3.57722e+06	525580		2004-12-13	Middle Soldier Canyon	JES-05-121	65	65	14	-14	lineation mylonitic stretch shape directed Description		NE	954.325
JES-04-842	JES-04-842	32.3281	-110.699	3.57684e+06	528315		2004-04-28	Molino Canyon - middle	JES-04-842	64	64	12	-12	sld, stretching lineation, directed down-plunge		NE	1035.24
JES-05-033	JES-05-033	32.331	-110.718	3.57716e+06	526519		2004-10-22	Prison Camp S 22 Oct	JES-05-033	59	59	0	0	lineation stretch shape mylonitic Description		NE	1048.89
JES-05-111	JES-05-111	32.3322	-110.723	3.57729e+06	526024		2004-11-24	Middle Soldier Canyon	JES-05-111	59	59	9	-9	lineation mylonitic stretch shape directed Description		NE	1096.83
JES-05-113	JES-05-113	32.3324	-110.725	3.57732e+06	525878		2004-12-13	Middle Soldier Canyon	JES-05-113	50	50	9	-9	lineation stretch shape mylonitic Description		NE	1104.33
JES-04-843	JES-04-843	32.329	-110.697	3.57694e+06	528483		2004-04-28	Molino Canyon - middle	JES-04-843	63	63	10	-10	sld, stretching lineation, directed down-plunge		NE	1163.43
JES-05-032	JES-05-032	32.3322	-110.718	3.57729e+06	526502		2004-10-22	Prison Camp S 22 Oct	JES-05-032	51	51	5	-5	lineation mylonitic stretch shape directed Description		NE	1180.04
JES-05-023	JES-05-023	32.333	-110.724	3.57738e+06	525993		2004-10-22	Prison Camp S 22 Oct	JES-05-023	59	59	9	-9	lineation stretch shape mylonitic Description		NE	1184.63
JES-05-145	JES-05-145	32.3346	-110.734	3.57756e+06	525022		2004-12-20	Gibbon Mtn E	JES-05-145	51	51	5	-5	lineation mylonitic stretch shape directed Description		NE	1196.7
JES-05-031	JES-05-031	32.3324	-110.718	3.57732e+06	526497		2004-10-22	Prison Camp S 22 Oct	JES-05-031	65	65	6	-6	lineation stretch shape mylonitic Description		NE	1207.2
JES-05-028	JES-05-028	32.333	-110.72	3.57739e+06	526368		2004-10-22	Prison Camp S 22 Oct	JES-05-028	55	55	9	-9	lineation stretch shape mylonitic Description		SW	1252.55
JES-05-056	JES-05-056	32.3321	-110.713	3.57729e+06	526994		2004-11-05	Prison Camp SE (5 Nov)	JES-05-056	57	57	6	-6	lineation mylonitic stretch shape directed Description		NE	1257.59
JES-05-020	JES-05-020	32.3338	-110.724	3.57747e+06	525986		2004-10-22	Prison Camp S 22 Oct	JES-05-020	58	58	11	-11	lineation mylonitic stretch shape directed Description		NE	1276.45
JES-05-143	JES-05-143	32.3354	-110.733	3.57764e+06	525097		2004-12-20	Gibbon Mtn E	JES-05-143	59	59	5	-5	lineation stretch shape mylonitic Description		NE	1293.28
JES-05-138	JES-05-138	32.335	-110.729	3.5776e+06	525544		2004-12-20	Gibbon Mtn E	JES-05-138	63	63	12	-12	lineation mylonitic stretch shape directed Description		NE	1333.28
JES-05-137	JES-05-137	32.335	-110.728	3.5776e+06	525636		2004-12-20	Gibbon Mtn E	JES-05-137	55	55	14	-14	lineation mylonitic stretch shape directed Description		NE	1347.72
JES-11-005		32.3348	-110.726	3577585	525764	NAD83	2010-07-25	Windy Point	JES-11-005	55	55	11	-11	lineation	trend and plunge	NE	1351.21
JES-05-134	JES-05-134	32.3351	-110.725	3.57761e+06	525834		2004-12-20	Gibbon Mtn E	JES-05-134	52	52	11	-11	lineation mylonitic stretch shape directed Description		NE	1387.94
JES-05-005	JES-05-005	32.3344	-110.72	3.57754e+06	526352		2004-10-20	Prison Camp E	JES-05-005	54	54	11	-11	lineation mylonitic stretch shape directed Description		NE	1402.87
JES-05-133	JES-05-133	32.3353	-110.724	3.57764e+06	525937		2004-12-20	Gibbon Mtn E	JES-05-133	49	49	14	-14	lineation mylonitic stretch shape directed Description		NE	1433.23
JES-05-001	JES-05-001	32.3352	-110.721	3.57763e+06	526287		2004-10-20	Prison Camp E	JES-05-001	45	45	27	-27	lineation mylonitic stretch shape directed Description		NE	1479.96
JES-05-581		32.3444	-110.78	3.57863e+06	520730		2005-03-18	Sabino Cyn, upper	JES-05-581	46	46	7	-7	mylonitic lineation		NE	1549.52
JES-06-467		32.3312	-110.675	3.57719e+06	530619	NAD83	2006-04-15	E Molino Basin (W Spr Cyn)	JES-06-467	40	40	14	-14	mylonitic lineation, down-dip arrow	trend and plunge	NE	1774.69
JES-06-469		32.3317	-110.673	3.57725e+06	530758	NAD83	2006-04-15	E Molino Basin (W Spr Cyn)	JES-06-469	48	48	12	-12	mylonitic lineation, down-dip arrow	trend and plunge	NE	1852.08
JES-06-470		32.332	-110.672	3.57728e+06	530829	NAD83	2006-04-15	E Molino Basin (W Spr Cyn)	JES-06-470	39	39	14	-14	mylonitic lineation, down-dip arrow	trend and plunge	NE	1899.22
SMR-04-0632		32.3418	-110.734	3.57835e+06	525013	NAD83		Sycamore Reservoir area	SMR-04-0632	48	48	11	-11	lin	lineation mylonitic stretch shape directed Description	SW	1990.18
JES-06-473		32.3347	-110.67	3.57758e+06	531022	NAD83	2006-04-15	E Molino Basin (W Spr Cyn)	JES-06-473	41	41	19	-19	mylonitic lineation, down-dip arrow	trend and plunge	NE	2227.81
JES-06-474		32.3356	-110.669	3.57768e+06	531106	NAD83	2006-04-15	E Molino Basin (W Spr Cyn)	JES-06-474	36	36	12	-12	mylonitic lineation, down-dip arrow	trend and plunge	NE	2342.07
SMR-04-0645		32.3493	-110.748	3.57918e+06	523683	NAD83		Sycamore Reservoir area	SMR-04-0645	47	47	8	-8	lin	lineation mylonitic stretch shape directed Description	NE	2601.01
JES-04-753	JES-04-753	32.3404	-110.685	3.57821e+06	529621		2004-04-19	Molino basin near E	JES-04-753	40	40	20	-20	sld, stretching lineation, directed down-plunge		NE	2622.39
JES-04-754	JES-04-754	32.3403	-110.684	3.5782e+06	529706		2004-04-19	Molino basin near E	JES-04-754	39	39	19	-19	sld, stretching lineation, directed down-plunge		NE	2623.65
SMR-04-0659		32.3507	-110.755	3.57933e+06	523037	NAD83		Sycamore Reservoir area	SMR-04-0659	51	51	12	-12	lin	lineation mylonitic stretch shape directed Description	NE	2639.62
SMR-04-0641		32.3497	-110.745	3.57922e+06	523990	NAD83		Sycamore Reservoir area	SMR-04-0641	13		35	-35	lin	lineation mylonitic stretch shape directed Description	NE	2691.53
SMR-04-0642		32.3504	-110.746	3.5793e+06	523936	NAD83		Sycamore Reservoir area	SMR-04-0642	44	44	30	-30	lin	lineation stretch shape mylonitic Description	NE	2759.47
JES-04-757	JES-04-757	32.3434	-110.684	3.57855e+06	529714		2004-04-19	Molino basin near E	JES-04-757	35	35	12	-12	sld, stretching lineation, directed down-plunge		NE	2976
JES-04-763	JES-04-763	32.3464	-110.68	3.57887e+06	530148		2004-04-19	Molino basin near E	JES-04-763	37	37	9	-9	sld, stretching lineation, directed down-plunge		NE	3375.83
JES-11-003		32.3679	-110.718	3.58125e+06	526505	NAD83	2010-07-24	Windy Point	JES-11-003	43	43	2	-2	mylonitic lineation, up-dip arrow	trend and plunge	SW	5136.07
JES-11-002		32.3681	-110.718	3.58128e+06	526525	NAD83	2010-07-24	Windy Point	JES-11-002	40	40	1	-1	mylonitic lineation, up-dip arrow	trend and plunge	SW	5169.55
JES-05-673	JES-05-673	32.3684	-110.716	3.58131e+06	526749		2005-04-29	Windy Point	JES-05-673	44	44	2	-2	mylonitic lineation	trend and plunge	SW	5240.5
JES-05-670	JES-05-670	32.3693	-110.714	3.58141e+06	526861		2005-04-29	Windy Point	JES-05-670	43	43	1	-1	mylonitic lineation	trend and plunge	SW	5362.3
JES-08-002		32.3978	-110.687	3.58458e+06	529412	NAD83	2007-08-26	Green Mtn trail	JES-08-002	24	24	1	-1	mylonitic lineation	trend and plunge		8955.28
JES-08-004		32.3972	-110.687	3.58451e+06	529473	NAD83	2007-08-26	Green Mtn trail	JES-08-004	24	24	6	-6	mylonitic lineation	trend and plunge		8898.63
JES-04-760	JES-04-760	32.3449	-110.681	3.57871e+06	529979		2004-04-19	Molino basin near E	JES-04-760	25	25	16	-16	ml, Mineral lineation, plunging			3183.47
JES-06-486		32.3432	-110.662	3.57853e+06	531825	NAD83	2006-04-24	E Molino Basin (W Spr Cyn)	JES-06-486	26	26	13	-13	mylonitic lineation	trend and plunge		3313.48
JES-06-495		32.3445	-110.654	3.57868e+06	532514	NAD83	2006-04-24	E Molino Basin (W Spr Cyn)	JES-06-495	26	26	14	-14	mylonitic lineation	trend and plunge		3577
SMR-04-0633		32.3422	-110.735	3.57839e+06	524930	NAD83		Sycamore Reservoir area	SMR-04-0633	26	26	18	-18	lin	lineation stretch shape mylonitic Description		2019.26
JES-08-006		32.4029	-110.698	3.58514e+06	528395	NAD83	2007-09-02	Barnum Rock area	JES-08-006	27	27	18	-18	mylonitic lineation	trend and plunge		9345.58
JES-08-008		32.4033	-110.697	3.58518e+06	528534	NAD83	2007-09-02	Barnum Rock area	JES-08-008	27	27	8	-8	mylonitic lineation	trend and plunge		9408.4
JES-06-478		32.3394	-110.667	3.57811e+06	531349	NAD83	2006-04-15	E Molino Basin (W Spr Cyn)	JES-06-478	27	27	14	-14	mylonitic lineation	trend and plunge		2814.12
JES-06-481		32.3404	-110.665	3.57822e+06	531527	NAD83	2006-04-24	E Molino Basin (W Spr Cyn)	JES-06-481	27	27	9	-9	mylonitic lineation	trend and plunge		2951.56
JES-06-484		32.3422	-110.663	3.57842e+06	531746	NAD83	2006-04-24	E Molino Basin (W Spr Cyn)	JES-06-484	27	27	4	-4	mylonitic lineation	trend and plunge		3191.77
JES-06-491		32.342	-110.657	3.57839e+06	532287	NAD83	2006-04-24	E Molino Basin (W Spr Cyn)	JES-06-491	27	27	12	-12	mylonitic lineation	trend and plunge		3252.71
JES-06-492		32.3417	-110.656	3.57836e+06	532348	NAD83	2006-04-24	E Molino Basin (W Spr Cyn)	JES-06-492	28	28	7	-7	mylonitic lineation	trend and plunge		3231.65
JES-08-011		32.4088	-110.698	3.58579e+06	528445	NAD83	2007-09-02	Barnum Rock area	JES-08-011	29	29	2	-2	mylonitic lineation	trend and plunge		10009.9
JES-06-485		32.3427	-110.662	3.57847e+06	531774	NAD83	2006-04-24	E Molino Basin (W Spr Cyn)	JES-06-485	29	29	3	-3	mylonitic lineation	trend and plunge		3245.84
JES-06-487		32.3437	-110.661	3.57858e+06	531894	NAD83	2006-04-24	E Molino Basin (W Spr Cyn)	JES-06-487	29	29	8	-8	mylonitic lineation	trend and plunge		3373.45
JES-06-493		32.3429	-110.655	3.5785e+06	532447	NAD83	2006-04-24	E Molino Basin (W Spr Cyn)	JES-06-493	29	29	7	-7	mylonitic lineation	trend and plunge		3383.48
JES-08-009		32.4074	-110.697	3.58564e+06	528451	NAD83	2007-09-02	Barnum Rock area	JES-08-009	30	30	17	-17	mylonitic lineation	trend and plunge		9855.68
JES-06-497		32.3463	-110.656	3.57888e+06	532372	NAD83	2006-04-24	E Molino Basin (W Spr Cyn)	JES-06-497	30	30	4	-4	mylonitic lineation	trend and plunge		3751.84
JES-04-761	JES-04-761	32.3458	-110.68	3.57881e+06	530080		2004-04-19	Molino basin near E	JES-04-761	30	30	11	-11	lt, Lineation, generic tectonic			3301.42
JES-98-109		32.3416	-110.733	3.57833e+06	525132	NAD83	1998-08-28	Prison Camp west 98	JES-98-109	30	30	20	-20	mylonitic lineation	trend and plunge		1988.22
JES-06-477		32.339	-110.667	3.57806e+06	531323	NAD83	2006-04-15	E Molino Basin (W Spr Cyn)	JES-06-477	31	31	19	-19	mylonitic lineation	trend and plunge		2763.87
JES-06-482		32.3407	-110.665	3.57825e+06	531567	NAD83	2006-04-24	E Molino Basin (W Spr Cyn)	JES-06-482	31	31	10	-10	mylonitic lineation	trend and plunge		2988.01
JES-06-483		32.3415	-110.664	3.57834e+06	531637	NAD83	2006-04-24	E Molino Basin (W Spr Cyn)	JES-06-483	31	31	4	-4	mylonitic lineation	trend and plunge		3090.51
JES-06-496		32.3454	-110.653	3.57877e+06	532642	NAD83	2006-04-24	E Molino Basin (W Spr Cyn)	JES-06-496	31	31	12	-12	mylonitic lineation	trend and plunge		3693.94
JES-04-764	JES-04-764	32.3479	-110.678	3.57905e+06	530277		2004-04-19	Molino basin near E	JES-04-764	32	32	10	-10	lt, Lineation, generic tectonic			3568.47
SMR-04-0635		32.3441	-110.739	3.5786e+06	524578	NAD83		Sycamore Reservoir area	SMR-04-0635	32	32	23	-23	lin	lineation stretch shape mylonitic Description		2169.19
JES-08-007		32.4022	-110.699	3.58506e+06	528329	NAD83	2007-09-02	Barnum Rock area	JES-08-007	33	33	17	-17	mylonitic lineation	trend and plunge		9255.08
JES-06-476		32.3386	-110.667	3.57802e+06	531296	NAD83	2006-04-15	E Molino Basin (W Spr Cyn)	JES-06-476	33	33	12	-12	mylonitic lineation	trend and plunge		2714.05
JES-06-494		32.3442	-110.654	3.57864e+06	532538	NAD83	2006-04-24	E Molino Basin (W Spr Cyn)	JES-06-494	33	33	9	-9	mylonitic lineation	trend and plunge		3539.37
JES-08-001		32.3982	-110.688	3.58462e+06	529368	NAD83	2007-08-26	Green Mtn trail	JES-08-001	33	33	3	-3	mylonitic lineation	trend and plunge		8993.05
JES-06-479		32.3399	-110.667	3.57816e+06	531368	NAD83	2006-04-15	E Molino Basin (W Spr Cyn)	JES-06-479	34	34	18	-18	mylonitic lineation	trend and plunge		2867.33
JES-04-762	JES-04-762	32.3457	-110.68	3.5788e+06	530106		2004-04-19	Molino basin near E	JES-04-762	34	34	10	-10	lt, Lineation, generic tectonic			3289.78
JES-98-108		32.3421	-110.735	3.57839e+06	524953	NAD83	1998-08-28	Prison Camp west 98	JES-98-108	34	34	26	-26	mylonitic lineation	trend and plunge		2015.18
JES-11-007		32.386	-110.691	3.58326e+06	529076	NAD83	2010-08-08	S Green Mtn	JES-11-007	35	35	5	-5	mylonitic lineation	trend and plunge		7586.25
SMR-04-0644		32.3501	-110.748	3.57928e+06	523700	NAD83		Sycamore Reservoir area	SMR-04-0644	36	36	12	-12	lin	lineation stretch shape mylonitic Description		2694.87
JES-08-005		32.4056	-110.699	3.58543e+06	528327	NAD83	2007-09-02	Barnum Rock area	JES-08-005	37	37	33	-33	mylonitic lineation	trend and plunge		9628.26
JES-08-012		32.4089	-110.699	3.5858e+06	528277	NAD83	2007-09-02	Barnum Rock area	JES-08-012	37	37	8	-8	mylonitic lineation	trend and plunge		9988.33
JES-08-395		32.409	-110.7	3.58581e+06	528166	NAD83	2008-08-17	Barnum Rock area	JES-08-395	37	37	22	-22	mylonitic lineation	trend and plunge		9977.21
JES-04-466	JES-04-466	32.3371	-110.687	3.57784e+06	529497		2004-03-18	Molino basin ridge to E	JES-04-466	37	37	26	-26	ml, Mineral lineation, plunging			2232.58
JES-04-469	JES-04-469	32.3373	-110.685	3.57786e+06	529635		2004-03-18	Molino basin ridge to E	JES-04-469	37	37	9	-9	ml, Mineral lineation, plunging			2278.74
SMR-04-0637		32.3449	-110.741	3.5787e+06	524351	NAD83		Sycamore Reservoir area	SMR-04-0637	37	37	27	-27	lin	lineation mylonitic stretch shape directed Description		2225.1
JES-11-004		32.3676	-110.718	3.58121e+06	526492	NAD83	2010-07-24	Windy Point	JES-11-004	37	37	2	-2	mylonitic lineation	trend and plunge		5101.08
JES-06-472		32.3334	-110.671	3.57744e+06	530953	NAD83	2006-04-15	E Molino Basin (W Spr Cyn)	JES-06-472	38	38	16	-16	mylonitic lineation	trend and plunge		2079.13
JES-06-475		32.3367	-110.669	3.57781e+06	531128	NAD83	2006-04-15	E Molino Basin (W Spr Cyn)	JES-06-475	38	38	23	-23	mylonitic lineation	trend and plunge		2477.21
JES-06-480		32.3402	-110.666	3.5782e+06	531474	NAD83	2006-04-24	E Molino Basin (W Spr Cyn)	JES-06-480	38	38	16	-16	mylonitic lineation	trend and plunge		2924.08
JES-04-752	JES-04-752	32.34	-110.686	3.57816e+06	529523		2004-04-19	Molino basin near E	JES-04-752	38	38	15	-15	ml, Mineral lineation, plunging			2557.95
SMR-04-0638		32.3474	-110.744	3.57897e+06	524118	NAD83		Sycamore Reservoir area	SMR-04-0638	38	38	27	-27	lin	lineation stretch shape mylonitic Description		2462.01
SMR-04-0640		32.349	-110.745	3.57915e+06	524000	NAD83		Sycamore Reservoir area	SMR-04-0640	38	38	5	-5	lin	lineation stretch shape mylonitic Description		2617.21
JES-05-671	JES-05-671	32.3686	-110.714	3.58133e+06	526897		2005-04-29	Windy Point	JES-05-671	38	38	2	-2	mylonitic lineation	trend and plunge		5290.34
JES-06-471		32.3325	-110.672	3.57733e+06	530861	NAD83	2006-04-15	E Molino Basin (W Spr Cyn)	JES-06-471	39	39	19	-19	mylonitic lineation	trend and plunge		1955.85
JES-04-465	JES-04-465	32.337	-110.687	3.57783e+06	529412		2004-03-18	Molino basin ridge to E	JES-04-465	39	39	20	-20	ml, Mineral lineation, plunging			2210.32
JES-04-479	JES-04-479	32.3357	-110.681	3.57769e+06	529990		2004-03-18	Molino basin ridge to E	JES-04-479	39	39	12	-12	ml, Mineral lineation, plunging			2163.3
JES-11-008		32.385	-110.693	3.58316e+06	528834	NAD83	2010-08-08	S Green Mtn	JES-11-008	39	39	3	-3	mylonitic lineation	trend and plunge		7437.06
JES-04-759	JES-04-759	32.3447	-110.682	3.57868e+06	529916		2004-04-19	Molino basin near E	JES-04-759	40	40	8	-8	ml, Mineral lineation, plunging			3145.9
JES-98-107		32.3434	-110.739	3.57853e+06	524602	NAD83	1998-08-28	Prison Camp west 98	JES-98-107	40	40	44	-44	mylonitic lineation	trend and plunge		2098.3
SMR-04-0629		32.3406	-110.731	3.57822e+06	525298	NAD83		Sycamore Reservoir area	SMR-04-0629	40	40	10	-10	lin	lineation stretch shape mylonitic Description		1904.01
JES-05-666	JES-05-666	32.3707	-110.712	3.58156e+06	527122		2005-04-29	Windy Point	JES-05-666	40	40	7	-7	mylonitic lineation	trend and plunge		5554.1
JES-05-667	JES-05-667	32.3707	-110.712	3.58157e+06	527090		2005-04-29	Windy Point	JES-05-667	40	40	5	-5	mylonitic lineation	trend and plunge		5553.73
JES-11-001		32.3684	-110.717	3.58131e+06	526593	NAD83	2010-07-24	Windy Point	JES-11-001	40	40	1	-1	mylonitic lineation	trend and plunge		5215.43
JES-04-756	JES-04-756	32.3423	-110.684	3.57842e+06	529769		2004-04-19	Molino basin near E	JES-04-756	41	41	26	-26	ml, Mineral lineation, plunging			2856.23
JES-04-758	JES-04-758	32.3445	-110.683	3.57866e+06	529841		2004-04-19	Molino basin near E	JES-04-758	41	41	11	-11	ml, Mineral lineation, plunging			3112.31
JES-04-489	JES-04-489	32.335	-110.68	3.57762e+06	530132		2004-03-18	Molino basin ridge to E	JES-04-489	41	41	2	-2	ml, Mineral lineation, plunging			2116.13
JES-04-848	JES-04-848	32.3367	-110.691	3.5778e+06	529039		2004-04-28	Molino Canyon - middle	JES-04-848	41	41	15	-15	lt, Lineation, generic tectonic			2112.73
JES-05-016	JES-05-016	32.338	-110.714	3.57794e+06	526955		2004-10-20	Prison Camp E	JES-05-016	41	41	10	-10	lineation stretch shape mylonitic Description			1905.05
JES-07-005		32.3819	-110.72	3.5828e+06	526325	NAD83	2006-07-01	Rose Peak area	JES-07-005	41	41	4	-4	mylonitic lineation	trend and plunge		6662.12
JES-04-755	JES-04-755	32.3411	-110.684	3.57829e+06	529760		2004-04-19	Molino basin near E	JES-04-755	42	42	17	-17	lt, Lineation, generic tectonic			2724.72
JES-04-464	JES-04-464	32.3369	-110.688	3.57782e+06	529354		2004-03-18	Molino basin ridge to E	JES-04-464	42	42	18	-18	ml, Mineral lineation, plunging			2188.59
JES-04-482	JES-04-482	32.3354	-110.681	3.57766e+06	530023		2004-03-18	Molino basin ridge to E	JES-04-482	42	42	13	-13	ml, Mineral lineation, plunging			2140.84
JES-04-488	JES-04-488	32.3352	-110.68	3.57763e+06	530099		2004-03-18	Molino basin ridge to E	JES-04-488	42	42	14	-14	ml, Mineral lineation, plunging			2124.59
JES-04-490	JES-04-490	32.3343	-110.68	3.57754e+06	530117		2004-03-18	Molino basin ridge to E	JES-04-490	42	42	7	-7	ml, Mineral lineation, plunging			2036.61
JES-05-017	JES-05-017	32.338	-110.715	3.57794e+06	526818		2004-10-20	Prison Camp E	JES-05-017	42	42	6	-6	lineation stretch shape mylonitic Description			1884.06
JES-05-018	JES-05-018	32.3382	-110.716	3.57796e+06	526745		2004-10-20	Prison Camp E	JES-05-018	42	42	12	-12	lineation stretch shape mylonitic Description			1890.81
JES-98-106		32.345	-110.741	3.57871e+06	524382	NAD83	1998-08-28	Prison Camp west 98	JES-98-106	42	42	32	-32	mylonitic lineation	trend and plunge		2244.39
JES-05-677	JES-05-677	32.3733	-110.709	3.58185e+06	527346		2005-04-29	Windy Point	JES-05-677	42	42	6	-6	mylonitic lineation	trend and plunge		5882.68
JES-04-475	JES-04-475	32.3379	-110.683	3.57793e+06	529833		2004-03-18	Molino basin ridge to E	JES-04-475	43	43	7	-7	lt, Lineation, generic tectonic			2379.96
JES-05-015	JES-05-015	32.3378	-110.711	3.57792e+06	527168		2004-10-20	Prison Camp E	JES-05-015	43	43	7	-7	lineation stretch shape mylonitic Description			1920.79
SMR-04-0628		32.3398	-110.729	3.57813e+06	525529	NAD83		Sycamore Reservoir area	SMR-04-0628	43	43	5	-5	lin	lineation stretch shape mylonitic Description		1857.77
SMR-04-0643		32.349	-110.747	3.57914e+06	523842	NAD83		Sycamore Reservoir area	SMR-04-0643	43	43	16	-16	lin	lineation stretch shape mylonitic Description		2587.69
SMR-04-0652		32.3507	-110.754	3.57933e+06	523106	NAD83		Sycamore Reservoir area	SMR-04-0652	43	43	7	-7	lin	lineation stretch shape mylonitic Description		2653.2
JES-05-668	JES-05-668	32.3697	-110.713	3.58145e+06	526958		2005-04-29	Windy Point	JES-05-668	43	43	2	-2	mylonitic lineation	trend and plunge		5414.57
JES-05-672	JES-05-672	32.3682	-110.715	3.58128e+06	526777		2005-04-29	Windy Point	JES-05-672	43	43	2	-2	mylonitic lineation	trend and plunge		5216.2
JES-04-477	JES-04-477	32.3374	-110.682	3.57788e+06	529917		2004-03-18	Molino basin ridge to E	JES-04-477	44	44	17	-17	lt, Lineation, generic tectonic			2340.06
JES-04-483	JES-04-483	32.3354	-110.681	3.57766e+06	530036		2004-03-18	Molino basin ridge to E	JES-04-483	44	44	12	-12	lt, Lineation, generic tectonic			2142.02
JES-04-484	JES-04-484	32.3357	-110.681	3.57769e+06	530054		2004-03-18	Molino basin ridge to E	JES-04-484	44	44	6	-6	ml, Mineral lineation, plunging			2176.04
JES-04-509	JES-04-509	32.3344	-110.695	3.57755e+06	528713		2004-03-18	Molino basin ridge to E	JES-04-509	44	44	19	-19	ml, Mineral lineation, plunging			1806.03
JES-98-103		32.3406	-110.732	3.57822e+06	525246	NAD83	1998-08-28	Prison Camp west 98	JES-98-103	44	44	17.6693	-17.6693	mylonitic lineation	trend and plunge		1895.34
JES-07-002		32.3819	-110.719	3.5828e+06	526445	NAD83	2006-07-01	Rose Peak area	JES-07-002	44	44	4	-4	mylonitic lineation	trend and plunge		6680.71
JES-05-669	JES-05-669	32.3697	-110.714	3.58146e+06	526928		2005-04-29	Windy Point	JES-05-669	44	44	8	-8	mylonitic lineation	trend and plunge		5416.54
JES-05-674	JES-05-674	32.3686	-110.716	3.58133e+06	526734		2005-04-29	Windy Point	JES-05-674	44	44	4	-4	mylonitic lineation	trend and plunge		5258.99
JES-04-478	JES-04-478	32.336	-110.682	3.57772e+06	529952		2004-03-18	Molino basin ridge to E	JES-04-478	45	45	24	-24	lt, Lineation, generic tectonic	Ethan Perry collected two oriented samples here		2192.93
JES-04-467	JES-04-467	32.3377	-110.686	3.57792e+06	529571		2004-03-18	Molino basin ridge to E	JES-04-467	45	45	15	-15	ml, Mineral lineation, plunging			2321
JES-04-473	JES-04-473	32.3375	-110.683	3.5779e+06	529791		2004-03-18	Molino basin ridge to E	JES-04-473	45	45	19	-19	ml, Mineral lineation, plunging			2336.91
JES-04-481	JES-04-481	32.335	-110.682	3.57762e+06	529955		2004-03-18	Molino basin ridge to E	JES-04-481	45	45	7	-7	ml, Mineral lineation, plunging			2085.43
JES-04-491	JES-04-491	32.3342	-110.681	3.57752e+06	530066		2004-03-18	Molino basin ridge to E	JES-04-491	45	45	18	-18	ml, Mineral lineation, plunging			2008.05
JES-04-493	JES-04-493	32.332	-110.681	3.57728e+06	529980		2004-03-18	Molino basin ridge to E	JES-04-493	45	45	12	-12	ml, Mineral lineation, plunging			1751.62
JES-04-845	JES-04-845	32.3329	-110.695	3.57737e+06	528725		2004-04-28	Molino Canyon - middle	JES-04-845	45	45	20	-20	ml, Mineral lineation, plunging			1635.04
SMR-04-0630		32.3418	-110.733	3.57836e+06	525099	NAD83		Sycamore Reservoir area	SMR-04-0630	45	45	5	-5	lin	lineation stretch shape mylonitic Description		2010.62
SMR-04-0647		32.3492	-110.749	3.57918e+06	523607	NAD83		Sycamore Reservoir area	SMR-04-0647	45	45	22	-22	lin	lineation stretch shape mylonitic Description		2580.26
JES-05-676	JES-05-676	32.3728	-110.71	3.58179e+06	527318		2005-04-29	Windy Point	JES-05-676	45	45	3	-3	mylonitic lineation	trend and plunge		5817.99
JES-04-492	JES-04-492	32.3337	-110.681	3.57747e+06	530049		2004-03-18	Molino basin ridge to E	JES-04-492	47	47	6	-6	ml, Mineral lineation, plunging			1955.2
JES-04-494	JES-04-494	32.3316	-110.682	3.57724e+06	529965		2004-03-18	Molino basin ridge to E	JES-04-494	47	47	14	-14	ml, Mineral lineation, plunging			1710.11
JES-04-511	JES-04-511	32.3363	-110.692	3.57775e+06	528949		2004-03-18	Molino basin ridge to E	JES-04-511	47	47	20	-20	ml, Mineral lineation, plunging			2053.63
JES-04-846	JES-04-846	32.3332	-110.695	3.57741e+06	528712		2004-04-28	Molino Canyon - middle	JES-04-846	47	47	23	-23	ml, Mineral lineation, plunging			1669.86
JES-98-104		32.3411	-110.732	3.57827e+06	525203	NAD83	1998-08-28	Prison Camp west 98	JES-98-104	47	47	31.2972	-31.2972	mylonitic lineation	trend and plunge		1945.13
JES-05-305	JES-05-305	32.3442	-110.778	3.57861e+06	520897		2005-02-03	Sabino Cyn N, phoneline trail	JES-05-305	47	47	5	-5	lineation stretch shape mylonitic Description			1560.55
SMR-04-0657		32.3492	-110.756	3.57917e+06	522972	NAD83		Sycamore Reservoir area	SMR-04-0657	47	47	20	-20	lin	lineation stretch shape mylonitic Description		2462.71
JES-05-163	JES-05-163	32.3375	-110.727	3.57788e+06	525690		2004-12-20	Gibbon Mtn E	JES-05-163	48	48	10	-10	lineation stretch shape mylonitic Description			1633.78
JES-04-471	JES-04-471	32.3377	-110.684	3.57791e+06	529764		2004-03-18	Molino basin ridge to E	JES-04-471	48	48	8	-8	ml, Mineral lineation, plunging			2345.38
JES-04-486	JES-04-486	32.3356	-110.68	3.57768e+06	530090		2004-03-18	Molino basin ridge to E	JES-04-486	48	48	11	-11	ml, Mineral lineation, plunging			2168.08
JES-04-502	JES-04-502	32.3314	-110.689	3.57721e+06	529287		2004-03-18	Molino basin ridge to E	JES-04-502	48	48	8	-8	ml, Mineral lineation, plunging			1570.34
JES-05-003	JES-05-003	32.3347	-110.72	3.57757e+06	526307		2004-10-20	Prison Camp E	JES-05-003	48	48	18	-18	lineation stretch shape mylonitic Description			1431.32
JES-05-012	JES-05-012	32.3348	-110.716	3.57758e+06	526752		2004-10-20	Prison Camp E	JES-05-012	48	48	15	-15	lineation stretch shape mylonitic Description			1508.98
JES-06-468		32.3315	-110.674	3.57723e+06	530685	NAD83	2006-04-15	E Molino Basin (W Spr Cyn)	JES-06-468	49	49	20	-20	mylonitic lineation	trend and plunge		1824.11
JES-05-156	JES-05-156	32.3377	-110.739	3.5779e+06	524590		2004-12-20	Gibbon Mtn E	JES-05-156	49	49	9	-9	lineation stretch shape mylonitic Description			1464.21
JES-04-470	JES-04-470	32.3377	-110.684	3.57791e+06	529742		2004-03-18	Molino basin ridge to E	JES-04-470	49	49	19	-19	ml, Mineral lineation, plunging			2344.69
JES-04-474	JES-04-474	32.3375	-110.683	3.57789e+06	529815		2004-03-18	Molino basin ridge to E	JES-04-474	49	49	4	-4	ml, Mineral lineation, plunging			2332.94
JES-04-480	JES-04-480	32.3352	-110.682	3.57763e+06	529953		2004-03-18	Molino basin ridge to E	JES-04-480	49	49	2	-2	ml, Mineral lineation, plunging			2103.09
JES-04-495	JES-04-495	32.3313	-110.682	3.57721e+06	529919		2004-03-18	Molino basin ridge to E	JES-04-495	49	49	12	-12	ml, Mineral lineation, plunging			1670.39
JES-04-496	JES-04-496	32.3312	-110.683	3.57719e+06	529853		2004-03-18	Molino basin ridge to E	JES-04-496	49	49	8	-8	ml, Mineral lineation, plunging			1639.31
JES-04-500	JES-04-500	32.3316	-110.688	3.57724e+06	529399		2004-03-18	Molino basin ridge to E	JES-04-500	49	49	17	-17	ml, Mineral lineation, plunging			1615.13
JES-05-008	JES-05-008	32.334	-110.718	3.5775e+06	526521		2004-10-20	Prison Camp E	JES-05-008	49	49	10	-10	lineation stretch shape mylonitic Description			1388.22
JES-07-003		32.3816	-110.719	3.58277e+06	526420	NAD83	2006-07-01	Rose Peak area	JES-07-003	49	49	18	-18	mylonitic lineation	trend and plunge		6649.07
JES-05-301	JES-05-301	32.3441	-110.78	3.5786e+06	520724		2005-02-03	Sabino Cyn N, phoneline trail	JES-05-301	49	49	2	-2	lineation stretch shape mylonitic Description			1523.52
JES-05-302	JES-05-302	32.3443	-110.779	3.57862e+06	520752		2005-02-03	Sabino Cyn N, phoneline trail	JES-05-302	49	49	9	-9	lineation stretch shape mylonitic Description			1543.22
SMR-04-0634		32.3423	-110.736	3.57841e+06	524801	NAD83		Sycamore Reservoir area	SMR-04-0634	49	49	10	-10	lin	lineation stretch shape mylonitic Description		2016.61
JES-05-139	JES-05-139	32.3355	-110.73	3.57765e+06	525429		2004-12-20	Gibbon Mtn E	JES-05-139	50	50	10	-10	lineation stretch shape mylonitic Description			1360.99
JES-05-155	JES-05-155	32.3372	-110.738	3.57785e+06	524663		2004-12-20	Gibbon Mtn E	JES-05-155	50	50	4	-4	lineation stretch shape mylonitic Description			1426.46
JES-05-165	JES-05-165	32.3377	-110.732	3.57791e+06	525211		2004-12-27	Gibbon Mtn SE	JES-05-165	50	50	9	-9	lineation stretch shape mylonitic Description			1578.41
JES-04-508	JES-04-508	32.333	-110.695	3.57739e+06	528751		2004-03-18	Molino basin ridge to E	JES-04-508	50	50	18	-18	lt, Lineation, generic tectonic			1652.4
JES-04-472	JES-04-472	32.338	-110.683	3.57794e+06	529811		2004-03-18	Molino basin ridge to E	JES-04-472	50	50	3	-3	ml, Mineral lineation, plunging			2386.27
JES-04-476	JES-04-476	32.3377	-110.683	3.57791e+06	529879		2004-03-18	Molino basin ridge to E	JES-04-476	50	50	10	-10	ml, Mineral lineation, plunging			2366.68
JES-04-507	JES-04-507	32.3324	-110.693	3.57733e+06	528898		2004-03-18	Molino basin ridge to E	JES-04-507	50	50	20	-20	ml, Mineral lineation, plunging			1618.07
JES-05-051	JES-05-051	32.3333	-110.716	3.57741e+06	526689		2004-11-05	Prison Camp SE (5 Nov)	JES-05-051	50	50	2	-2	lineation stretch shape mylonitic Description			1335.41
JES-05-157	JES-05-157	32.3388	-110.74	3.57802e+06	524507		2004-12-20	Gibbon Mtn E	JES-05-157	51	51	1	-1	lineation stretch shape mylonitic Description			1579.28
JES-05-159	JES-05-159	32.3389	-110.744	3.57803e+06	524082		2004-12-20	Gibbon Mtn E	JES-05-159	51	51	8	-8	lineation stretch shape mylonitic Description			1509.97
JES-04-497	JES-04-497	32.3316	-110.685	3.57723e+06	529651		2004-03-18	Molino basin ridge to E	JES-04-497	51	51	11	-11	ml, Mineral lineation, plunging			1652.42
JES-04-505	JES-04-505	32.3315	-110.691	3.57723e+06	529064		2004-03-18	Molino basin ridge to E	JES-04-505	51	51	15	-15	ml, Mineral lineation, plunging			1546.92
JES-04-506	JES-04-506	32.3317	-110.691	3.57724e+06	529052		2004-03-18	Molino basin ridge to E	JES-04-506	51	51	18	-18	ml, Mineral lineation, plunging			1560.91
JES-05-006	JES-05-006	32.3344	-110.72	3.57754e+06	526358		2004-10-20	Prison Camp E	JES-05-006	51	51	13	-13	lineation stretch shape mylonitic Description			1401.87
JES-05-009	JES-05-009	32.3341	-110.718	3.57751e+06	526578		2004-10-20	Prison Camp E	JES-05-009	51	51	4	-4	lineation stretch shape mylonitic Description			1409.79
JES-05-027	JES-05-027	32.3338	-110.721	3.57747e+06	526274		2004-10-22	Prison Camp S 22 Oct	JES-05-027	51	51	10	-10	lineation stretch shape mylonitic Description			1324.78
JES-05-584		32.3553	-110.775	3.57984e+06	521124		2005-03-18	Sabino Cyn, upper	JES-05-584	51	51	12	-12	mylonitic lineation			2824.64
JES-04-817	JES-04-817	32.3203	-110.708	3.57598e+06	527445		2004-04-23	Babad Do'ag - Hwy NE	JES-04-817	52	52	1	-1	ml, Mineral lineation, plunging			23.2645
JES-05-161	JES-05-161	32.3394	-110.743	3.57809e+06	524206		2004-12-20	Gibbon Mtn E	JES-05-161	52	52	9	-9	lineation stretch shape mylonitic Description			1595.77
JES-04-487	JES-04-487	32.3353	-110.68	3.57764e+06	530099		2004-03-18	Molino basin ridge to E	JES-04-487	52	52	8	-8	ml, Mineral lineation, plunging			2136.59
JES-04-501	JES-04-501	32.3313	-110.689	3.5772e+06	529295		2004-03-18	Molino basin ridge to E	JES-04-501	52	52	10	-10	ml, Mineral lineation, plunging			1558.68
JES-04-504	JES-04-504	32.3314	-110.69	3.57722e+06	529154		2004-03-18	Molino basin ridge to E	JES-04-504	52	52	20	-20	ml, Mineral lineation, plunging			1551.02
JES-05-011	JES-05-011	32.334	-110.716	3.57749e+06	526710		2004-10-20	Prison Camp E	JES-05-011	52	52	8	-8	lineation stretch shape mylonitic Description			1417.94
JES-05-013	JES-05-013	32.3352	-110.716	3.57763e+06	526753		2004-10-20	Prison Camp E	JES-05-013	52	52	24	-24	lineation stretch shape mylonitic Description			1564.15
JES-05-014	JES-05-014	32.3356	-110.716	3.57767e+06	526765		2004-10-20	Prison Camp E	JES-05-014	52	52	21	-21	lineation stretch shape mylonitic Description			1607.17
JES-05-053	JES-05-053	32.3332	-110.715	3.5774e+06	526840		2004-11-05	Prison Camp SE (5 Nov)	JES-05-053	52	52	3	-3	lineation stretch shape mylonitic Description			1348.75
JES-05-054	JES-05-054	32.3331	-110.714	3.57739e+06	526945		2004-11-05	Prison Camp SE (5 Nov)	JES-05-054	52	52	1	-1	lineation stretch shape mylonitic Description			1358.37
JES-98-101		32.3359	-110.724	3.57771e+06	525931	NAD83	1998-08-28	Prison Camp west 98	JES-98-101	52	52	12.1244	-12.1244	mylonitic lineation	trend and plunge		1500.26
JES-05-180	JES-05-180	32.3349	-110.743	3.57759e+06	524170		2004-12-27	Gibbon Mtn SE	JES-05-180	53	53	5	-5	lineation stretch shape mylonitic Description			1084.73
JES-04-499	JES-04-499	32.3318	-110.686	3.57726e+06	529551		2004-03-18	Molino basin ridge to E	JES-04-499	53	53	9	-9	ml, Mineral lineation, plunging			1659.64
JES-04-510	JES-04-510	32.3354	-110.694	3.57766e+06	528838		2004-03-18	Molino basin ridge to E	JES-04-510	53	53	18	-18	ml, Mineral lineation, plunging			1937
JES-04-838	JES-04-838	32.3197	-110.707	3.57591e+06	527552		2004-04-28	Molino Canyon - middle	JES-04-838	53	53	10	-10	ml, Mineral lineation, plunging			-19.7824
JES-05-004	JES-05-004	32.3348	-110.72	3.57758e+06	526323		2004-10-20	Prison Camp E	JES-05-004	53	53	8	-8	lineation stretch shape mylonitic Description			1443
JES-05-019	JES-05-019	32.3345	-110.723	3.57755e+06	526042		2004-10-22	Prison Camp S 22 Oct	JES-05-019	53	53	14	-14	lineation stretch shape mylonitic Description			1359.85
JES-05-048	JES-05-048	32.3333	-110.718	3.57741e+06	526556		2004-11-05	Prison Camp SE (5 Nov)	JES-05-048	53	53	3	-3	lineation stretch shape mylonitic Description			1311.1
JES-05-049	JES-05-049	32.3332	-110.717	3.5774e+06	526596		2004-11-05	Prison Camp SE (5 Nov)	JES-05-049	53	53	5	-5	lineation stretch shape mylonitic Description			1307.81
JES-05-052	JES-05-052	32.3333	-110.716	3.57741e+06	526750		2004-11-05	Prison Camp SE (5 Nov)	JES-05-052	53	53	3	-3	lineation stretch shape mylonitic Description			1345.65
JES-05-055	JES-05-055	32.3325	-110.713	3.57733e+06	526988		2004-11-05	Prison Camp SE (5 Nov)	JES-05-055	53	53	3	-3	lineation stretch shape mylonitic Description			1303.58
JES-05-306	JES-05-306	32.3428	-110.779	3.57846e+06	520774		2005-02-03	Sabino Cyn N, phoneline trail	JES-05-306	53	53	8	-8	lineation stretch shape mylonitic Description			1384.91
SMR-04-0654		32.3489	-110.755	3.57913e+06	523045	NAD83		Sycamore Reservoir area	SMR-04-0654	53	53	5	-5	lin	lineation stretch shape mylonitic Description		2440.96
JES-04-816	JES-04-816	32.3201	-110.709	3.57596e+06	527435		2004-04-23	Babad Do'ag - Hwy NE	JES-04-816	54	54	4	-4	ml, Mineral lineation, plunging			4.58666
JES-05-136	JES-05-136	32.3344	-110.727	3.57754e+06	525662		2004-12-20	Gibbon Mtn E	JES-05-136	54	54	12	-12	lineation stretch shape mylonitic Description			1284.08
JES-05-154	JES-05-154	32.3356	-110.737	3.57767e+06	524717		2004-12-20	Gibbon Mtn E	JES-05-154	54	54	10	-10	lineation stretch shape mylonitic Description			1258.52
JES-04-503	JES-04-503	32.3313	-110.689	3.57721e+06	529241		2004-03-18	Molino basin ridge to E	JES-04-503	54	54	14	-14	ml, Mineral lineation, plunging			1555.62
JES-04-839	JES-04-839	32.3176	-110.708	3.57568e+06	527443		2004-04-28	Molino Canyon - middle	JES-04-839	54	54	6	-6	ml, Mineral lineation, plunging			-276.073
JES-05-002	JES-05-002	32.3348	-110.721	3.57758e+06	526299		2004-10-20	Prison Camp E	JES-05-002	54	54	10	-10	lineation stretch shape mylonitic Description			1432.97
JES-05-044	JES-05-044	32.3361	-110.72	3.57772e+06	526397		2004-11-05	Prison Camp SE (5 Nov)	JES-05-044	54	54	5	-5	lineation stretch shape mylonitic Description			1595.42
JES-05-050	JES-05-050	32.3331	-110.717	3.5774e+06	526637		2004-11-05	Prison Camp SE (5 Nov)	JES-05-050	54	54	4	-4	lineation stretch shape mylonitic Description			1310.69
JES-98-105		32.3507	-110.743	3.57933e+06	524224	NAD83	1998-08-28	Prison Camp west 98	JES-98-105	54	54	1	-1	mylonitic lineation	trend and plunge		2841.9
JES-05-304	JES-05-304	32.3442	-110.779	3.57861e+06	520829		2005-02-03	Sabino Cyn N, phoneline trail	JES-05-304	54	54	5	-5	lineation stretch shape mylonitic Description			1550.14
JES-05-160	JES-05-160	32.339	-110.744	3.57804e+06	524095		2004-12-20	Gibbon Mtn E	JES-05-160	55	55	4	-4	lineation stretch shape mylonitic Description			1522.15
JES-05-212	JES-05-212	32.3332	-110.752	3.5774e+06	523378		2005-01-20	Gibbon Mtn SW	JES-05-212	55	55	7	-7	lineation stretch shape mylonitic Description			760.84
JES-05-184	JES-05-184	32.3176	-110.746	3.57567e+06	523943		2004-12-30	Lower Soldier Cyn	JES-05-184	55	55	0	0	lineation stretch shape mylonitic Description			-868.348
JES-05-025	JES-05-025	32.3328	-110.722	3.57736e+06	526140		2004-10-22	Prison Camp S 22 Oct	JES-05-025	55	55	7	-7	lineation stretch shape mylonitic Description			1193.29
JES-05-030	JES-05-030	32.3321	-110.719	3.57728e+06	526444		2004-10-22	Prison Camp S 22 Oct	JES-05-030	55	55	5	-5	lineation stretch shape mylonitic Description			1163.3
JES-05-043	JES-05-043	32.3349	-110.723	3.57759e+06	526084		2004-10-22	Prison Camp S 22 Oct	JES-05-043	55	55	12	-12	lineation stretch shape mylonitic Description			1408.9
JES-05-045	JES-05-045	32.335	-110.718	3.57761e+06	526559		2004-11-05	Prison Camp SE (5 Nov)	JES-05-045	55	55	10	-10	lineation stretch shape mylonitic Description			1504.6
JES-05-046	JES-05-046	32.3337	-110.718	3.57746e+06	526534		2004-11-05	Prison Camp SE (5 Nov)	JES-05-046	55	55	9	-9	lineation stretch shape mylonitic Description			1351.41
JES-05-058	JES-05-058	32.3313	-110.715	3.57719e+06	526860		2004-11-05	Prison Camp SE (5 Nov)	JES-05-058	55	55	9	-9	lineation stretch shape mylonitic Description			1144.1
JES-05-079	JES-05-079	32.3349	-110.723	3.57759e+06	526084		2004-11-05	Prison Camp SE (5 Nov)	JES-05-079	55	55	12	-12	lineation stretch shape mylonitic Description			1408.9
JES-98-102		32.3397	-110.729	3.57812e+06	525539	NAD83	1998-08-28	Prison Camp west 98	JES-98-102	55	55	17.9315	-17.9315	mylonitic lineation	trend and plunge		1851.5
JES-05-313	JES-05-313	32.3359	-110.782	3.57769e+06	520491		2005-02-03	Sabino Cyn N, phoneline trail	JES-05-313	55	55	0	0	lineation stretch shape mylonitic Description			570.421
JES-05-166	JES-05-166	32.3337	-110.74	3.57745e+06	524463		2004-12-27	Gibbon Mtn SE	JES-05-166	56	56	6	-6	lineation stretch shape mylonitic Description			1000.9
JES-05-207	JES-05-207	32.3343	-110.746	3.57752e+06	523895		2005-01-20	Gibbon Mtn SW	JES-05-207	56	56	5	-5	lineation stretch shape mylonitic Description			974.59
JES-05-024	JES-05-024	32.333	-110.723	3.57739e+06	526043		2004-10-22	Prison Camp S 22 Oct	JES-05-024	56	56	10	-10	lineation stretch shape mylonitic Description			1198.02
JES-05-039	JES-05-039	32.3299	-110.719	3.57704e+06	526435		2004-10-22	Prison Camp S 22 Oct	JES-05-039	56	56	3	-3	lineation stretch shape mylonitic Description			913.792
JES-05-077	JES-05-077	32.3291	-110.722	3.57695e+06	526140		2004-11-05	Prison Camp SE (5 Nov)	JES-05-077	56	56	7	-7	lineation stretch shape mylonitic Description			778.292
SMR-04-0660		32.3508	-110.755	3.57935e+06	523022	NAD83		Sycamore Reservoir area	SMR-04-0660	56	56	14	-14	lin	lineation stretch shape mylonitic Description		2655.1
JES-04-498	JES-04-498	32.3317	-110.685	3.57725e+06	529615		2004-03-18	Molino basin ridge to E	JES-04-498	57	57	9	-9	ml, Mineral lineation, plunging			1663.38
JES-05-026	JES-05-026	32.3337	-110.722	3.57746e+06	526174		2004-10-22	Prison Camp S 22 Oct	JES-05-026	57	57	8	-8	lineation stretch shape mylonitic Description			1293
JES-05-042	JES-05-042	32.3326	-110.723	3.57734e+06	526080		2004-10-22	Prison Camp S 22 Oct	JES-05-042	57	57	10	-10	lineation stretch shape mylonitic Description			1155.23
JES-05-047	JES-05-047	32.3335	-110.718	3.57744e+06	526552		2004-11-05	Prison Camp SE (5 Nov)	JES-05-047	57	57	12	-12	lineation stretch shape mylonitic Description			1335.43
JES-05-310	JES-05-310	32.3375	-110.782	3.57787e+06	520503		2005-02-03	Sabino Cyn N, phoneline trail	JES-05-310	57	57	2	-2	lineation stretch shape mylonitic Description			753.435
JES-05-312	JES-05-312	32.3367	-110.783	3.57778e+06	520434		2005-02-03	Sabino Cyn N, phoneline trail	JES-05-312	57	57	5	-5	lineation stretch shape mylonitic Description			646.857
JES-05-314	JES-05-314	32.3328	-110.785	3.57735e+06	520214		2005-02-03	Sabino Cyn N, phoneline trail	JES-05-314	57	57	8	-8	lineation stretch shape mylonitic Description			181.942
JES-05-151	JES-05-151	32.3335	-110.736	3.57743e+06	524812		2004-12-20	Gibbon Mtn E	JES-05-151	58	58	1	-1	lineation stretch shape mylonitic Description			1036.46
JES-05-118	JES-05-118	32.3306	-110.727	3.57711e+06	525678		2004-12-13	Middle Soldier Canyon	JES-05-118	58	58	8	-8	lineation stretch shape mylonitic Description			862.769
JES-04-831	JES-04-831	32.3243	-110.705	3.57642e+06	527783		2004-04-28	Molino Canyon - middle	JES-04-831	58	58	11	-11	ml, Mineral lineation, plunging			523.981
JES-05-040	JES-05-040	32.3304	-110.72	3.5771e+06	526356		2004-10-22	Prison Camp S 22 Oct	JES-05-040	58	58	5	-5	lineation stretch shape mylonitic Description			961.536
JES-04-822	JES-04-822	32.3231	-110.706	3.57629e+06	527630		2004-04-23	Babad Do'ag - Hwy NE	JES-04-822	59	59	13	-13	ml, Mineral lineation, plunging			364.308
JES-04-823	JES-04-823	32.3241	-110.706	3.5764e+06	527645		2004-04-23	Babad Do'ag - Hwy NE	JES-04-823	59	59	16	-16	ml, Mineral lineation, plunging			482.825
JES-05-142	JES-05-142	32.3358	-110.733	3.57768e+06	525164		2004-12-20	Gibbon Mtn E	JES-05-142	59	59	14	-14	lineation stretch shape mylonitic Description			1349.52
JES-05-178	JES-05-178	32.3325	-110.744	3.57733e+06	524098		2004-12-27	Gibbon Mtn SE	JES-05-178	59	59	2	-2	lineation stretch shape mylonitic Description			811.653
JES-05-228	JES-05-228	32.3323	-110.749	3.5773e+06	523596		2005-01-20	Gibbon Mtn SW	JES-05-228	59	59	4	-4	lineation stretch shape mylonitic Description			702.42
JES-05-232	JES-05-232	32.3334	-110.744	3.57742e+06	524088		2005-01-20	Gibbon Mtn SW	JES-05-232	59	59	10	-10	lineation stretch shape mylonitic Description			907.975
JES-05-182	JES-05-182	32.316	-110.744	3.57549e+06	524139		2004-12-30	Lower Soldier Cyn	JES-05-182	59	59	2	-2	lineation stretch shape mylonitic Description			-1017.46
JES-05-114	JES-05-114	32.3318	-110.725	3.57724e+06	525875		2004-12-13	Middle Soldier Canyon	JES-05-114	59	59	11	-11	lineation stretch shape mylonitic Description			1027.82
JES-05-115	JES-05-115	32.331	-110.725	3.57716e+06	525870		2004-12-13	Middle Soldier Canyon	JES-05-115	59	59	8	-8	lineation stretch shape mylonitic Description			944.986
JES-05-129	JES-05-129	32.3281	-110.73	3.57684e+06	525430		2004-12-13	Middle Soldier Canyon	JES-05-129	59	59	9	-9	lineation stretch shape mylonitic Description			548.156
JES-05-063	JES-05-063	32.3268	-110.717	3.5767e+06	526662		2004-11-05	Prison Camp SE (5 Nov)	JES-05-063	59	59	0	0	lineation stretch shape mylonitic Description			613.88
JES-05-078	JES-05-078	32.3325	-110.723	3.57733e+06	526099		2004-11-05	Prison Camp SE (5 Nov)	JES-05-078	59	59	12	-12	lineation stretch shape mylonitic Description			1149.41
JES-05-307	JES-05-307	32.3425	-110.78	3.57843e+06	520728		2005-02-03	Sabino Cyn N, phoneline trail	JES-05-307	59	59	14	-14	lineation stretch shape mylonitic Description			1347.19
JES-05-308	JES-05-308	32.3409	-110.78	3.57824e+06	520731		2005-02-03	Sabino Cyn N, phoneline trail	JES-05-308	59	59	13	-13	lineation stretch shape mylonitic Description			1164.69
JES-05-144	JES-05-144	32.3348	-110.734	3.57758e+06	525036		2004-12-20	Gibbon Mtn E	JES-05-144	60	60	7	-7	lineation stretch shape mylonitic Description			1221.04
JES-05-146	JES-05-146	32.3344	-110.734	3.57753e+06	525002		2004-12-20	Gibbon Mtn E	JES-05-146	60	60	5	-5	lineation stretch shape mylonitic Description			1168.34
JES-05-167	JES-05-167	32.3332	-110.743	3.5774e+06	524192		2004-12-27	Gibbon Mtn SE	JES-05-167	60	60	3	-3	lineation stretch shape mylonitic Description			899.426
JES-05-209	JES-05-209	32.334	-110.749	3.57749e+06	523663		2005-01-20	Gibbon Mtn SW	JES-05-209	60	60	6	-6	lineation stretch shape mylonitic Description			901.662
JES-05-041	JES-05-041	32.3305	-110.72	3.5771e+06	526324		2004-10-22	Prison Camp S 22 Oct	JES-05-041	60	60	7	-7	lineation stretch shape mylonitic Description			962.167
JES-05-071	JES-05-071	32.3236	-110.721	3.57634e+06	526303		2004-11-05	Prison Camp SE (5 Nov)	JES-05-071	60	60	4	-4	lineation stretch shape mylonitic Description			200.647
JES-04-814	JES-04-814	32.3172	-110.709	3.57563e+06	527361		2004-04-23	Babad Do'ag - Hwy NE	JES-04-814	61	61	8	-8	ml, Mineral lineation, plunging			-333.831
JES-05-181	JES-05-181	32.332	-110.741	3.57727e+06	524385		2004-12-27	Gibbon Mtn SE	JES-05-181	61	61	1	-1	lineation stretch shape mylonitic Description			799.81
JES-05-213	JES-05-213	32.3323	-110.753	3.5773e+06	523282		2005-01-20	Gibbon Mtn SW	JES-05-213	61	61	0	0	lineation stretch shape mylonitic Description			645.733
JES-05-216	JES-05-216	32.3306	-110.754	3.57711e+06	523189		2005-01-20	Gibbon Mtn SW	JES-05-216	61	61	9	-9	lineation stretch shape mylonitic Description			445.128
JES-05-218	JES-05-218	32.3293	-110.756	3.57697e+06	523010		2005-01-20	Gibbon Mtn SW	JES-05-218	61	61	0	0	lineation stretch shape mylonitic Description			272.093
JES-05-230	JES-05-230	32.3328	-110.746	3.57735e+06	523890		2005-01-20	Gibbon Mtn SW	JES-05-230	61	61	2	-2	lineation stretch shape mylonitic Description			799.752
JES-05-127	JES-05-127	32.3267	-110.732	3.57668e+06	525197		2004-12-13	Middle Soldier Canyon	JES-05-127	61	61	7	-7	lineation stretch shape mylonitic Description			349.06
JES-05-131	JES-05-131	32.3286	-110.727	3.57689e+06	525676		2004-12-13	Middle Soldier Canyon	JES-05-131	61	61	11	-11	lineation stretch shape mylonitic Description			645.433
JES-04-830	JES-04-830	32.3247	-110.704	3.57647e+06	527891		2004-04-28	Molino Canyon - middle	JES-04-830	62	62	6	-6	ml, Mineral lineation, plunging			592.102
JES-05-034	JES-05-034	32.3307	-110.716	3.57713e+06	526716		2004-10-22	Prison Camp S 22 Oct	JES-05-034	62	62	0	0	lineation stretch shape mylonitic Description			1052.94
JES-05-059	JES-05-059	32.3303	-110.715	3.57708e+06	526817		2004-11-05	Prison Camp SE (5 Nov)	JES-05-059	62	62	5	-5	lineation stretch shape mylonitic Description			1024.89
JES-05-069	JES-05-069	32.3239	-110.718	3.57637e+06	526577		2004-11-05	Prison Camp SE (5 Nov)	JES-05-069	62	62	0	0	lineation stretch shape mylonitic Description			271.622
JES-04-818	JES-04-818	32.3209	-110.708	3.57605e+06	527467		2004-04-23	Babad Do'ag - Hwy NE	JES-04-818	63	63	2	-2	ml, Mineral lineation, plunging			99.956
JES-04-825	JES-04-825	32.3254	-110.705	3.57654e+06	527780		2004-04-23	Babad Do'ag - Hwy NE	JES-04-825	63	63	5	-5	ml, Mineral lineation, plunging			645.472
JES-05-231	JES-05-231	32.3331	-110.745	3.57739e+06	523978		2005-01-20	Gibbon Mtn SW	JES-05-231	63	63	5	-5	lineation stretch shape mylonitic Description			853.517
JES-05-132	JES-05-132	32.3288	-110.727	3.57692e+06	525725		2004-12-13	Middle Soldier Canyon	JES-05-132	63	63	8	-8	lineation stretch shape mylonitic Description			677.655
JES-04-836	JES-04-836	32.3211	-110.707	3.57606e+06	527578		2004-04-28	Molino Canyon - middle	JES-04-836	63	63	2	-2	ml, Mineral lineation, plunging			133.582
JES-05-061	JES-05-061	32.3288	-110.715	3.57692e+06	526869		2004-11-05	Prison Camp SE (5 Nov)	JES-05-061	63	63	8	-8	lineation stretch shape mylonitic Description			866.614
JES-05-073	JES-05-073	32.3249	-110.722	3.57649e+06	526144		2004-11-05	Prison Camp SE (5 Nov)	JES-05-073	63	63	8	-8	lineation stretch shape mylonitic Description			314.967
JES-05-315	JES-05-315	32.3307	-110.787	3.57711e+06	520071		2005-02-03	Sabino Cyn N, phoneline trail	JES-05-315	63	63	5	-5	lineation stretch shape mylonitic Description			-75.0527
JES-05-583		32.3511	-110.779	3.57937e+06	520827		2005-03-18	Sabino Cyn, upper	JES-05-583	63	63	2	-2	mylonitic lineation			2311.8
JES-05-126	JES-05-126	32.3252	-110.732	3.57652e+06	525247		2004-12-13	Middle Soldier Canyon	JES-05-126	64	64	1	-1	lineation stretch shape mylonitic Description			198.449
JES-05-035	JES-05-035	32.3296	-110.716	3.57701e+06	526739		2004-10-22	Prison Camp S 22 Oct	JES-05-035	64	64	3	-3	lineation stretch shape mylonitic Description			936.801
JES-05-067	JES-05-067	32.3258	-110.718	3.57658e+06	526529		2004-11-05	Prison Camp SE (5 Nov)	JES-05-067	64	64	2	-2	lineation stretch shape mylonitic Description			474.563
JES-05-148	JES-05-148	32.3317	-110.737	3.57723e+06	524759		2004-12-20	Gibbon Mtn E	JES-05-148	65	65	2	-2	lineation stretch shape mylonitic Description			829.565
JES-05-171	JES-05-171	32.3262	-110.746	3.57662e+06	523910		2004-12-27	Gibbon Mtn SE	JES-05-171	65	65	1	-1	lineation stretch shape mylonitic Description			74.1081
JES-05-225	JES-05-225	32.3302	-110.753	3.57706e+06	523216		2005-01-20	Gibbon Mtn SW	JES-05-225	65	65	1	-1	lineation stretch shape mylonitic Description			396.658
JES-04-832	JES-04-832	32.3241	-110.705	3.5764e+06	527758		2004-04-28	Molino Canyon - middle	JES-04-832	65	65	9	-9	ml, Mineral lineation, plunging			500.786
JES-04-837	JES-04-837	32.3202	-110.707	3.57597e+06	527566		2004-04-28	Molino Canyon - middle	JES-04-837	65	65	9	-9	ml, Mineral lineation, plunging			39.5676
JES-05-037	JES-05-037	32.3277	-110.717	3.57679e+06	526621		2004-10-22	Prison Camp S 22 Oct	JES-05-037	65	65	3	-3	lineation stretch shape mylonitic Description			701.001
JES-05-038	JES-05-038	32.328	-110.718	3.57683e+06	526571		2004-10-22	Prison Camp S 22 Oct	JES-05-038	65	65	1	-1	lineation stretch shape mylonitic Description			731.611
JES-05-062	JES-05-062	32.3275	-110.714	3.57677e+06	526938		2004-11-05	Prison Camp SE (5 Nov)	JES-05-062	65	65	6	-6	lineation stretch shape mylonitic Description			733.191
JES-05-064	JES-05-064	32.3268	-110.717	3.5767e+06	526662		2004-11-05	Prison Camp SE (5 Nov)	JES-05-064	65	65	0	0	lineation stretch shape mylonitic Description			613.88
JES-05-072	JES-05-072	32.3247	-110.722	3.57646e+06	526173		2004-11-05	Prison Camp SE (5 Nov)	JES-05-072	65	65	4	-4	lineation stretch shape mylonitic Description			293.834
JES-05-076	JES-05-076	32.3267	-110.723	3.57669e+06	526070		2004-11-05	Prison Camp SE (5 Nov)	JES-05-076	65	65	1	-1	lineation stretch shape mylonitic Description			505.545
JES-05-309	JES-05-309	32.338	-110.781	3.57792e+06	520641		2005-02-03	Sabino Cyn N, phoneline trail	JES-05-309	65	65	7	-7	lineation stretch shape mylonitic Description			825.59
JES-04-824	JES-04-824	32.3242	-110.706	3.57641e+06	527643		2004-04-23	Babad Do'ag - Hwy NE	JES-04-824	66	66	17	-17	ml, Mineral lineation, plunging	low-T (almost hot slickensides)		487.49
JES-05-186	JES-05-186	32.3179	-110.744	3.5757e+06	524136		2004-12-30	Lower Soldier Cyn	JES-05-186	66	66	3	-3	lineation mylonitic stretch shape directed Description			-804.963
JES-05-075	JES-05-075	32.3258	-110.723	3.57658e+06	526041		2004-11-05	Prison Camp SE (5 Nov)	JES-05-075	66	66	5	-5	lineation stretch shape mylonitic Description			395.679
JES-02-190		32.3196	-110.783	3.57588e+06	520443	NAD83	2001-12-29	Bear Canyon	JES-02-190	67	67	3	-3	mylonitic lineation	trend and plunge		-1247.64
JES-05-219	JES-05-219	32.3283	-110.758	3.57686e+06	522798		2005-01-20	Gibbon Mtn SW	JES-05-219	67	67	1	-1	lineation stretch shape mylonitic Description			124.521
JES-05-082	JES-05-082	32.3067	-110.717	3.57446e+06	526651		2004-11-10	lower Molino Cyn	JES-05-082	67	67	1	-1	lineation stretch shape mylonitic Description			-1621.97
JES-05-092	JES-05-092	32.3098	-110.71	3.57482e+06	527336		2004-11-10	lower Molino Cyn	JES-05-092	67	67	0	0	lineation stretch shape mylonitic Description			-1153.03
JES-05-185	JES-05-185	32.3167	-110.745	3.57557e+06	523982		2004-12-30	Lower Soldier Cyn	JES-05-185	67	67	11	-11	lineation mylonitic stretch shape directed Description			-964.804
JES-05-065	JES-05-065	32.3271	-110.717	3.57673e+06	526589		2004-11-05	Prison Camp SE (5 Nov)	JES-05-065	67	67	2	-2	lineation stretch shape mylonitic Description			631.63
JES-05-066	JES-05-066	32.3263	-110.718	3.57664e+06	526550		2004-11-05	Prison Camp SE (5 Nov)	JES-05-066	67	67	1	-1	lineation stretch shape mylonitic Description			535.087
JES-05-074	JES-05-074	32.3251	-110.723	3.57651e+06	526065		2004-11-05	Prison Camp SE (5 Nov)	JES-05-074	68	68	4	-4	lineation stretch shape mylonitic Description			321.706
JES-05-099	JES-05-099	32.3137	-110.709	3.57524e+06	527369		2004-11-10	lower Molino Cyn	JES-05-099	71	71	3	-3	lineation stretch shape mylonitic Description			-722.492
JES-08-003		32.3973	-110.687	3.58452e+06	529438	NAD83	2007-08-26	Green Mtn trail	JES-08-003	192	12	12	12	mylonitic lineation	trend and plunge		8900.24
JES-06-490		32.3424	-110.658	3.57844e+06	532181	NAD83	2006-04-24	E Molino Basin (W Spr Cyn)	JES-06-490	208	28	5	5	mylonitic lineation	trend and plunge		3280.43
JES-06-488		32.3429	-110.658	3.57849e+06	532159	NAD83	2006-04-24	E Molino Basin (W Spr Cyn)	JES-06-488	211	31	2	2	mylonitic lineation	trend and plunge		3332.5
JES-06-489		32.3426	-110.658	3.57846e+06	532182	NAD83	2006-04-24	E Molino Basin (W Spr Cyn)	JES-06-489	212	32	5	5	mylonitic lineation	trend and plunge		3307.26
JES-08-010		32.4082	-110.697	3.58572e+06	528512	NAD83	2007-09-02	Barnum Rock area	JES-08-010	215	35	4	4	mylonitic lineation	trend and plunge		9946.42
JES-04-468	JES-04-468	32.3378	-110.685	3.57792e+06	529626		2004-03-18	Molino basin ridge to E	JES-04-468	223	43	4	4	ml, Mineral lineation, plunging			2333.23
JES-07-004		32.3813	-110.72	3.58273e+06	526381	NAD83	2006-07-01	Rose Peak area	JES-07-004	223	43	5	5	mylonitic lineation	trend and plunge		6604.5
JES-07-001		32.3824	-110.719	3.58286e+06	526461	NAD83	2006-07-01	Rose Peak area	JES-07-001	230	50	8	8	mylonitic lineation	trend and plunge		6740.02
JES-05-158	JES-05-158	32.3395	-110.741	3.57809e+06	524417		2004-12-20	Gibbon Mtn E	JES-05-158	231	51	1	1	lineation stretch shape mylonitic Description			1634.18
JES-05-582		32.3491	-110.78	3.57915e+06	520722		2005-03-18	Sabino Cyn, upper	JES-05-582	233	53	0	0	mylonitic lineation			2068.18
JES-05-086	JES-05-086	32.307	-110.713	3.5745e+06	527035		2004-11-10	lower Molino Cyn	JES-05-086	234	54	20	20	lineation stretch shape mylonitic Description			-1520.54
JES-05-087	JES-05-087	32.3082	-110.712	3.57463e+06	527123		2004-11-10	lower Molino Cyn	JES-05-087	235	55	8	8	lineation stretch shape mylonitic Description			-1371.77
JES-05-174	JES-05-174	32.328	-110.748	3.57683e+06	523710		2004-12-27	Gibbon Mtn SE	JES-05-174	237	57	1	1	lineation stretch shape mylonitic Description			247.55
JES-05-106	JES-05-106	32.313	-110.715	3.57517e+06	526800		2004-11-10	lower Molino Cyn	JES-05-106	238	58	0	0	lineation stretch shape mylonitic Description			-888.966
JES-05-189	JES-05-189	32.3158	-110.743	3.57547e+06	524157		2004-12-30	Lower Soldier Cyn	JES-05-189	238	58	1	1	lineation stretch shape mylonitic Description			-1033.44
JES-05-466	JES-05-466	32.3251	-110.811	3.57649e+06	517756		2005-02-27	Sabino Cyn, west side	JES-05-466	238	58	17	17	lineation stretch shape mylonitic Description			-1089.5
JES-04-841	JES-04-841	32.3162	-110.708	3.57552e+06	527533		2004-04-28	Molino Canyon - middle	JES-04-841	239	59	6	6	ml, Mineral lineation, plunging			-415.972
JES-05-070	JES-05-070	32.3225	-110.719	3.57622e+06	526487		2004-11-05	Prison Camp SE (5 Nov)	JES-05-070	239	59	9	9	lineation stretch shape mylonitic Description			102.52
JES-04-801	JES-04-801	32.3094	-110.727	3.57477e+06	525719		2004-04-23	Babad Do'ag - Hwy NE	JES-04-801	240	60	7	7	ml, Mineral lineation, plunging			-1475.35
JES-04-819	JES-04-819	32.3214	-110.708	3.5761e+06	527509		2004-04-23	Babad Do'ag - Hwy NE	JES-04-819	240	60	3	3	ml, Mineral lineation, plunging			158.004
JES-02-191		32.3215	-110.78	3.5761e+06	520698	NAD83	2001-12-29	Bear Canyon	JES-02-191	240	60	7	7	mylonitic lineation	trend and plunge		-987.848
JES-05-215	JES-05-215	32.3317	-110.753	3.57723e+06	523231		2005-01-20	Gibbon Mtn SW	JES-05-215	240	60	2	2	lineation stretch shape mylonitic Description			575.175
JES-05-303	JES-05-303	32.3444	-110.779	3.57863e+06	520813		2005-02-03	Sabino Cyn N, phoneline trail	JES-05-303	240	60	1	1	lineation stretch shape mylonitic Description			1563.45
JES-05-325	JES-05-325	32.325	-110.8	3.57648e+06	518861		2005-02-03	Sabino Cyn, phoneline trail	JES-05-325	240	60	11	11	lineation stretch shape mylonitic Description			-909.084
JES-05-274	JES-05-274	32.3085	-110.75	3.57466e+06	523523		2005-01-28	Soldier Cyn, lower, west ridge	JES-05-274	240	60	9	9	lineation stretch shape mylonitic Description			-1946.82
JES-04-810	JES-04-810	32.3153	-110.711	3.57543e+06	527172		2004-04-23	Babad Do'ag - Hwy NE	JES-04-810	241	61	0	0	lth, lineation, horizontal			-571.545
JES-04-795	JES-04-795	32.3107	-110.724	3.57491e+06	525986		2004-04-23	Babad Do'ag - Hwy NE	JES-04-795	241	61	12	12	ml, Mineral lineation, plunging	med-T		-1286.55
JES-05-238	JES-05-238	32.3114	-110.717	3.57499e+06	526664		2005-01-25	Babad Do'ag N	JES-05-238	241	61	1	1	lineation stretch shape mylonitic Description			-1096.79
JES-05-170	JES-05-170	32.3285	-110.746	3.57688e+06	523923		2004-12-27	Gibbon Mtn SE	JES-05-170	241	61	2	2	lineation stretch shape mylonitic Description			332.289
JES-05-036	JES-05-036	32.3279	-110.716	3.57681e+06	526733		2004-10-22	Prison Camp S 22 Oct	JES-05-036	241	61	1	1	lineation mylonitic stretch shape directed Description			742.794
JES-05-462	JES-05-462	32.3309	-110.802	3.57713e+06	518660		2005-02-27	Sabino Cyn, west side	JES-05-462	241	61	10	10	lineation stretch shape mylonitic Description			-291.808
JES-04-813	JES-04-813	32.3164	-110.71	3.57555e+06	527278		2004-04-23	Babad Do'ag - Hwy NE	JES-04-813	242	62	7	7	ml, Mineral lineation, plunging			-430.759
JES-04-769	JES-04-769	32.3087	-110.736	3.57469e+06	524832		2004-04-19	Lower Mt. Lemmon Hwy	JES-04-769	242	62	18	18	ml, Mineral lineation, plunging			-1704.18
JES-04-834	JES-04-834	32.3225	-110.706	3.57622e+06	527712		2004-04-28	Molino Canyon - middle	JES-04-834	242	62	6	6	ml, Mineral lineation, plunging			314.067
JES-05-320	JES-05-320	32.3279	-110.793	3.5768e+06	519510		2005-02-03	Sabino Cyn, phoneline trail	JES-05-320	242	62	15	15	lineation stretch shape mylonitic Description			-487.186
JES-05-331	JES-05-331	32.3185	-110.806	3.57576e+06	518223		2005-02-03	Sabino Cyn, phoneline trail	JES-05-331	242	62	6	6	lineation stretch shape mylonitic Description			-1743.14
JES-05-338	JES-05-338	32.312	-110.808	3.57503e+06	518031		2005-02-03	Sabino Cyn, phoneline trail	JES-05-338	242	62	18	18	lineation stretch shape mylonitic Description			-2501.36
JES-04-792	JES-04-792	32.3109	-110.722	3.57493e+06	526142		2004-04-23	Babad Do'ag - Hwy NE	JES-04-792	243	63	18	18	ml, Mineral lineation, plunging			-1237.37
JES-04-793	JES-04-793	32.3107	-110.723	3.57491e+06	526109		2004-04-23	Babad Do'ag - Hwy NE	JES-04-793	243	63	13	13	ml, Mineral lineation, plunging			-1266.91
JES-04-798	JES-04-798	32.3094	-110.727	3.57476e+06	525732		2004-04-23	Babad Do'ag - Hwy NE	JES-04-798	243	63	13	13	ml, Mineral lineation, plunging			-1475.17
JES-05-175	JES-05-175	32.3284	-110.748	3.57686e+06	523711		2004-12-27	Gibbon Mtn SE	JES-05-175	243	63	1	1	lineation stretch shape mylonitic Description			281.717
JES-05-221	JES-05-221	32.3257	-110.759	3.57657e+06	522672		2005-01-20	Gibbon Mtn SW	JES-05-221	243	63	5	5	lineation stretch shape mylonitic Description			-185.621
JES-05-226	JES-05-226	32.3315	-110.751	3.57721e+06	523437		2005-01-20	Gibbon Mtn SW	JES-05-226	243	63	4	4	lineation stretch shape mylonitic Description			580.741
JES-05-083	JES-05-083	32.3068	-110.714	3.57447e+06	526941		2004-11-10	lower Molino Cyn	JES-05-083	243	63	1	1	lineation stretch shape mylonitic Description			-1562.31
JES-05-084	JES-05-084	32.3067	-110.713	3.57447e+06	526999		2004-11-10	lower Molino Cyn	JES-05-084	243	63	8	8	lineation stretch shape mylonitic Description			-1553.58
JES-05-110	JES-05-110	32.31	-110.719	3.57484e+06	526468		2004-11-10	lower Molino Cyn	JES-05-110	243	63	9	9	lineation stretch shape mylonitic Description			-1278.67
JES-04-775	JES-04-775	32.312	-110.742	3.57505e+06	524259		2004-04-19	Lower Mt. Lemmon Hwy	JES-04-775	243	63	10	10	ml, Mineral lineation, plunging			-1439.33
JES-05-057	JES-05-057	32.3312	-110.713	3.57718e+06	526969		2004-11-05	Prison Camp SE (5 Nov)	JES-05-057	243	63	7	7	lineation stretch shape mylonitic Description			1150.39
JES-05-326	JES-05-326	32.323	-110.804	3.57626e+06	518450		2005-02-03	Sabino Cyn, phoneline trail	JES-05-326	243	63	8	8	lineation stretch shape mylonitic Description			-1203.04
JES-05-460	JES-05-460	32.3295	-110.805	3.57697e+06	518380		2005-02-27	Sabino Cyn, west side	JES-05-460	243	63	10	10	lineation stretch shape mylonitic Description			-500.791
JES-05-461	JES-05-461	32.3304	-110.803	3.57707e+06	518501		2005-02-27	Sabino Cyn, west side	JES-05-461	243	63	12	12	lineation stretch shape mylonitic Description			-381.488
JES-05-283	JES-05-283	32.3212	-110.749	3.57607e+06	523584		2005-01-28	Soldier Cyn, lower, west ridge	JES-05-283	243	63	7	7	lineation stretch shape mylonitic Description			-529.586
JES-05-287	JES-05-287	32.317	-110.752	3.5756e+06	523306		2005-01-28	Soldier Cyn, lower, west ridge	JES-05-287	243	63	8	8	lineation stretch shape mylonitic Description			-1051.23
JES-05-288	JES-05-288	32.3163	-110.753	3.57552e+06	523254		2005-01-28	Soldier Cyn, lower, west ridge	JES-05-288	243	63	11	11	lineation stretch shape mylonitic Description			-1131.96
JES-05-266	JES-05-266	32.3124	-110.722	3.5751e+06	526207		2005-01-25	Babad Do'ag N	JES-05-266	244	64	8	8	lineation stretch shape mylonitic Description			-1056.47
JES-05-080	JES-05-080	32.3085	-110.719	3.57467e+06	526434		2004-11-10	lower Molino Cyn	JES-05-080	244	64	8	8	lineation stretch shape mylonitic Description			-1454.38
JES-04-779	JES-04-779	32.3088	-110.742	3.5747e+06	524289		2004-04-19	Lower Mt. Lemmon Hwy	JES-04-779	244	64	15	15	lt, Lineation, generic tectonic			-1782.29
JES-05-339	JES-05-339	32.3112	-110.81	3.57495e+06	517906		2005-02-03	Sabino Cyn, phoneline trail	JES-05-339	244	64	12	12	lineation stretch shape mylonitic Description			-2601.33
JES-05-464	JES-05-464	32.3323	-110.8	3.57729e+06	518792		2005-02-27	Sabino Cyn, west side	JES-05-464	244	64	18	18	lineation stretch shape mylonitic Description			-117.659
JES-04-794	JES-04-794	32.3106	-110.724	3.5749e+06	526000		2004-04-23	Babad Do'ag - Hwy NE	JES-04-794	245	65	10	10	ml, Mineral lineation, plunging			-1296.2
JES-04-804	JES-04-804	32.3101	-110.718	3.57484e+06	526566		2004-04-23	Babad Do'ag - Hwy NE	JES-04-804	245	65	5	5	ml, Mineral lineation, plunging			-1256.23
JES-05-259	JES-05-259	32.321	-110.721	3.57605e+06	526303		2005-01-25	Babad Do'ag N	JES-05-259	245	65	4	4	lineation stretch shape mylonitic Description			-93.3541
JES-05-265	JES-05-265	32.3134	-110.721	3.57521e+06	526256		2005-01-25	Babad Do'ag N	JES-05-265	245	65	6	6	lineation stretch shape mylonitic Description			-943.244
JES-05-147	JES-05-147	32.3326	-110.736	3.57733e+06	524841		2004-12-20	Gibbon Mtn E	JES-05-147	245	65	1	1	lineation stretch shape mylonitic Description			941.324
JES-05-173	JES-05-173	32.3237	-110.748	3.57634e+06	523739		2004-12-27	Gibbon Mtn SE	JES-05-173	245	65	10	10	lineation stretch shape mylonitic Description			-229.578
JES-05-222	JES-05-222	32.3257	-110.76	3.57656e+06	522630		2005-01-20	Gibbon Mtn SW	JES-05-222	245	65	7	7	lineation stretch shape mylonitic Description			-201.668
JES-05-090	JES-05-090	32.3085	-110.71	3.57467e+06	527305		2004-11-10	lower Molino Cyn	JES-05-090	245	65	5	5	lineation stretch shape mylonitic Description			-1302.23
JES-05-097	JES-05-097	32.3121	-110.709	3.57507e+06	527392		2004-11-10	lower Molino Cyn	JES-05-097	245	65	6	6	lineation stretch shape mylonitic Description			-887.633
JES-04-780	JES-04-780	32.3084	-110.741	3.57465e+06	524335		2004-04-19	Lower Mt. Lemmon Hwy	JES-04-780	245	65	12	12	lt, Lineation, generic tectonic			-1823.57
JES-04-785	JES-04-785	32.3076	-110.744	3.57456e+06	524081		2004-04-19	Lower Mt. Lemmon Hwy	JES-04-785	245	65	11	11	lt, Lineation, generic tectonic			-1959.19
JES-04-773	JES-04-773	32.3093	-110.739	3.57476e+06	524527		2004-04-19	Lower Mt. Lemmon Hwy	JES-04-773	245	65	8	8	ml, Mineral lineation, plunging			-1686.36
JES-05-068	JES-05-068	32.3247	-110.718	3.57646e+06	526517		2004-11-05	Prison Camp SE (5 Nov)	JES-05-068	245	65	8	8	lineation stretch shape mylonitic Description			351.555
JES-05-332	JES-05-332	32.3177	-110.809	3.57566e+06	517997		2005-02-03	Sabino Cyn, phoneline trail	JES-05-332	245	65	13	13	lineation stretch shape mylonitic Description			-1873.06
JES-05-457	JES-05-457	32.327	-110.81	3.5767e+06	517920		2005-02-27	Sabino Cyn, west side	JES-05-457	245	65	9	9	lineation stretch shape mylonitic Description			-849.977
JES-05-467	JES-05-467	32.3235	-110.814	3.5763e+06	517544		2005-02-27	Sabino Cyn, west side	JES-05-467	245	65	22	22	lineation stretch shape mylonitic Description			-1309.07
JES-05-276	JES-05-276	32.3133	-110.747	3.57519e+06	523847		2005-01-28	Soldier Cyn, lower, west ridge	JES-05-276	245	65	9	9	lineation stretch shape mylonitic Description			-1363.46
JES-05-277	JES-05-277	32.315	-110.747	3.57539e+06	523816		2005-01-28	Soldier Cyn, lower, west ridge	JES-05-277	245	65	8	8	lineation stretch shape mylonitic Description			-1175.66
JES-05-284	JES-05-284	32.3206	-110.751	3.576e+06	523457		2005-01-28	Soldier Cyn, lower, west ridge	JES-05-284	245	65	9	9	lineation stretch shape mylonitic Description			-625.895
JES-05-289	JES-05-289	32.3155	-110.754	3.57544e+06	523156		2005-01-28	Soldier Cyn, lower, west ridge	JES-05-289	245	65	10	10	lineation stretch shape mylonitic Description			-1233.4
JES-05-298	JES-05-298	32.3045	-110.747	3.57421e+06	523852		2005-01-28	Soldier Cyn, lower, west ridge	JES-05-298	245	65	13	13	lineation stretch shape mylonitic Description			-2342.62
JES-04-786	JES-04-786	32.3095	-110.72	3.57477e+06	526334		2004-04-23	Babad Do'ag - Hwy NE	JES-04-786	246	66	9	9	lt, Lineation, generic tectonic			-1365.16
JES-04-806	JES-04-806	32.3112	-110.714	3.57497e+06	526913		2004-04-23	Babad Do'ag - Hwy NE	JES-04-806	246	66	1	1	ml, Mineral lineation, plunging			-1070.01
JES-05-260	JES-05-260	32.3198	-110.722	3.57592e+06	526201		2005-01-25	Babad Do'ag N	JES-05-260	246	66	7	7	lineation stretch shape mylonitic Description			-242.47
JES-05-263	JES-05-263	32.3173	-110.723	3.57564e+06	526051		2005-01-25	Babad Do'ag N	JES-05-263	246	66	5	5	lineation stretch shape mylonitic Description			-546.64
JES-05-091	JES-05-091	32.309	-110.709	3.57473e+06	527352		2004-11-10	lower Molino Cyn	JES-05-091	246	66	18	18	lineation stretch shape mylonitic Description			-1240.35
JES-05-109	JES-05-109	32.3113	-110.717	3.57498e+06	526669		2004-11-10	lower Molino Cyn	JES-05-109	246	66	12	12	lineation stretch shape mylonitic Description			-1101.95
JES-04-776	JES-04-776	32.3118	-110.741	3.57503e+06	524377		2004-04-19	Lower Mt. Lemmon Hwy	JES-04-776	246	66	10	10	ml, Mineral lineation, plunging			-1438.53
JES-04-783	JES-04-783	32.3061	-110.744	3.57439e+06	524072		2004-04-19	Lower Mt. Lemmon Hwy	JES-04-783	246	66	17	17	ml, Mineral lineation, plunging			-2127.71
JES-05-340	JES-05-340	32.3114	-110.811	3.57496e+06	517787		2005-02-03	Sabino Cyn, phoneline trail	JES-05-340	246	66	20	20	lineation stretch shape mylonitic Description			-2608.3
JES-05-279	JES-05-279	32.3167	-110.747	3.57556e+06	523798		2005-01-28	Soldier Cyn, lower, west ridge	JES-05-279	246	66	4	4	lineation stretch shape mylonitic Description			-999.678
JES-05-286	JES-05-286	32.3191	-110.752	3.57583e+06	523324		2005-01-28	Soldier Cyn, lower, west ridge	JES-05-286	246	66	9	9	lineation stretch shape mylonitic Description			-814.212
JES-05-290	JES-05-290	32.3139	-110.753	3.57526e+06	523286		2005-01-28	Soldier Cyn, lower, west ridge	JES-05-290	246	66	10	10	lineation stretch shape mylonitic Description			-1392.59
JES-05-292	JES-05-292	32.3094	-110.754	3.57476e+06	523112		2005-01-28	Soldier Cyn, lower, west ridge	JES-05-292	246	66	15	15	lineation stretch shape mylonitic Description			-1922.79
JES-04-790	JES-04-790	32.3117	-110.721	3.57502e+06	526276		2004-04-23	Babad Do'ag - Hwy NE	JES-04-790	247	67	8	8	lt, Lineation, generic tectonic			-1125.89
JES-04-796	JES-04-796	32.3109	-110.724	3.57493e+06	525965		2004-04-23	Babad Do'ag - Hwy NE	JES-04-796	247	67	18	18	ml, Mineral lineation, plunging	low-T (almost hot slickensides)		-1268.07
JES-04-807	JES-04-807	32.3113	-110.714	3.57498e+06	526947		2004-04-23	Babad Do'ag - Hwy NE	JES-04-807	247	67	10	10	ml, Mineral lineation, plunging			-1059.3
JES-05-254	JES-05-254	32.3211	-110.713	3.57607e+06	527034		2005-01-25	Babad Do'ag N	JES-05-254	247	67	8	8	lineation stretch shape mylonitic Description			46.3024
JES-02-189		32.3184	-110.784	3.57575e+06	520298	NAD83	2001-12-29	Bear Canyon	JES-02-189	247	67	8	8	mylonitic lineation	trend and plunge		-1401.98
JES-02-192		32.3233	-110.776	3.57629e+06	521066	NAD83	2001-12-29	Bear Canyon	JES-02-192	247	67	6	6	mylonitic lineation	trend and plunge		-732.091
JES-05-095	JES-05-095	32.3114	-110.71	3.57499e+06	527345		2004-11-10	lower Molino Cyn	JES-05-095	247	67	7	7	lineation stretch shape mylonitic Description			-979.52
JES-05-107	JES-05-107	32.3132	-110.716	3.57519e+06	526731		2004-11-10	lower Molino Cyn	JES-05-107	247	67	4	4	lineation stretch shape mylonitic Description			-886.543
JES-04-784	JES-04-784	32.3062	-110.744	3.5744e+06	524076		2004-04-19	Lower Mt. Lemmon Hwy	JES-04-784	247	67	12	12	lt, Lineation, generic tectonic			-2113.03
JES-04-777	JES-04-777	32.3118	-110.741	3.57502e+06	524374		2004-04-19	Lower Mt. Lemmon Hwy	JES-04-777	247	67	9	9	ml, Mineral lineation, plunging			-1443.03
JES-05-482	JES-05-482	32.3197	-110.804	3.57589e+06	518446		2005-03-04	Sabino Cyn, east side (Blackett)	JES-05-482	247	67	17	17	lineation stretch shape mylonitic Description			-1571.72
JES-05-486	JES-05-486	32.3223	-110.801	3.57618e+06	518749		2005-03-04	Sabino Cyn, east side (Blackett)	JES-05-486	247	67	17	17	lineation stretch shape mylonitic Description			-1231.87
JES-05-488	JES-05-488	32.3243	-110.796	3.5764e+06	519239		2005-03-04	Sabino Cyn, east side (Blackett)	JES-05-488	247	67	9	9	lineation stretch shape mylonitic Description			-929.655
JES-05-334	JES-05-334	32.317	-110.808	3.57559e+06	518072		2005-02-03	Sabino Cyn, phoneline trail	JES-05-334	247	67	16	16	lineation stretch shape mylonitic Description			-1934.47
JES-05-336	JES-05-336	32.3146	-110.809	3.57532e+06	518013		2005-02-03	Sabino Cyn, phoneline trail	JES-05-336	247	67	18	18	lineation stretch shape mylonitic Description			-2210.37
JES-05-458	JES-05-458	32.3281	-110.807	3.57682e+06	518132		2005-02-27	Sabino Cyn, west side	JES-05-458	247	67	9	9	lineation stretch shape mylonitic Description			-699.404
JES-05-473	JES-05-473	32.3165	-110.818	3.57553e+06	517114		2005-02-27	Sabino Cyn, west side	JES-05-473	247	67	9	9	lineation stretch shape mylonitic Description			-2152.22
JES-05-280	JES-05-280	32.3184	-110.747	3.57576e+06	523772		2005-01-28	Soldier Cyn, lower, west ridge	JES-05-280	247	67	4	4	lineation stretch shape mylonitic Description			-806.041
JES-05-285	JES-05-285	32.3196	-110.752	3.57589e+06	523349		2005-01-28	Soldier Cyn, lower, west ridge	JES-05-285	247	67	8	8	lineation stretch shape mylonitic Description			-750.018
JES-05-264	JES-05-264	32.3143	-110.722	3.57531e+06	526211		2005-01-25	Babad Do'ag N	JES-05-264	248	68	3	3	lineation stretch shape mylonitic Description			-852.795
JES-05-081	JES-05-081	32.3082	-110.717	3.57463e+06	526667		2004-11-10	lower Molino Cyn	JES-05-081	248	68	7	7	lineation stretch shape mylonitic Description			-1452.29
JES-05-108	JES-05-108	32.3126	-110.718	3.57512e+06	526592		2004-11-10	lower Molino Cyn	JES-05-108	248	68	10	10	lineation stretch shape mylonitic Description			-975.866
JES-04-781	JES-04-781	32.3083	-110.741	3.57463e+06	524352		2004-04-19	Lower Mt. Lemmon Hwy	JES-04-781	248	68	15	15	lt, Lineation, generic tectonic			-1836.72
JES-05-478	JES-05-478	32.3181	-110.807	3.57571e+06	518147		2005-03-04	Sabino Cyn, east side (Blackett)	JES-05-478	248	68	11	11	lineation stretch shape mylonitic Description			-1803.89
JES-05-485	JES-05-485	32.3217	-110.802	3.57611e+06	518670		2005-03-04	Sabino Cyn, east side (Blackett)	JES-05-485	248	68	15	15	lineation stretch shape mylonitic Description			-1312.13
JES-05-491	JES-05-491	32.3254	-110.791	3.57653e+06	519680		2005-03-04	Sabino Cyn, east side (Blackett)	JES-05-491	248	68	12	12	lineation stretch shape mylonitic Description			-727.661
JES-05-337	JES-05-337	32.3131	-110.809	3.57515e+06	518006		2005-02-03	Sabino Cyn, phoneline trail	JES-05-337	248	68	10	10	lineation stretch shape mylonitic Description			-2382.55
JES-05-273	JES-05-273	32.3075	-110.75	3.57455e+06	523517		2005-01-28	Soldier Cyn, lower, west ridge	JES-05-273	248	68	13	13	lineation stretch shape mylonitic Description			-2064.83
JES-05-295	JES-05-295	32.3065	-110.75	3.57443e+06	523555		2005-01-28	Soldier Cyn, lower, west ridge	JES-05-295	248	68	11	11	lineation stretch shape mylonitic Description			-2170.45
JES-05-244	JES-05-244	32.3171	-110.714	3.57562e+06	526890		2005-01-25	Babad Do'ag N	JES-05-244	249	69	8	8	lineation stretch shape mylonitic Description			-423.862
JES-05-245	JES-05-245	32.3174	-110.714	3.57566e+06	526950		2005-01-25	Babad Do'ag N	JES-05-245	249	69	8	8	lineation stretch shape mylonitic Description			-376.794
JES-05-262	JES-05-262	32.3181	-110.723	3.57573e+06	526082		2005-01-25	Babad Do'ag N	JES-05-262	249	69	7	7	lineation stretch shape mylonitic Description			-446.438
JES-05-094	JES-05-094	32.3108	-110.71	3.57493e+06	527345		2004-11-10	lower Molino Cyn	JES-05-094	249	69	9	9	lineation stretch shape mylonitic Description			-1042.52
JES-04-770	JES-04-770	32.3088	-110.737	3.57469e+06	524793		2004-04-19	Lower Mt. Lemmon Hwy	JES-04-770	249	69	11	11	lt, Lineation, generic tectonic			-1703.72
JES-05-475	JES-05-475	32.3073	-110.81	3.57452e+06	517859		2005-03-04	Sabino Cyn, east side (Blackett)	JES-05-475	249	69	12	12	lineation stretch shape mylonitic Description			-3043.22
JES-05-479	JES-05-479	32.3176	-110.806	3.57565e+06	518261		2005-03-04	Sabino Cyn, east side (Blackett)	JES-05-479	249	69	12	12	lineation stretch shape mylonitic Description			-1839.76
JES-05-481	JES-05-481	32.3187	-110.804	3.57578e+06	518407		2005-03-04	Sabino Cyn, east side (Blackett)	JES-05-481	249	69	18	18	lineation stretch shape mylonitic Description			-1693.26
JES-05-323	JES-05-323	32.3257	-110.798	3.57656e+06	518995		2005-02-03	Sabino Cyn, phoneline trail	JES-05-323	249	69	12	12	lineation stretch shape mylonitic Description			-809.6
JES-05-335	JES-05-335	32.3157	-110.808	3.57544e+06	518040		2005-02-03	Sabino Cyn, phoneline trail	JES-05-335	249	69	13	13	lineation stretch shape mylonitic Description			-2086.84
JES-05-469	JES-05-469	32.3197	-110.813	3.57589e+06	517629		2005-02-27	Sabino Cyn, west side	JES-05-469	249	69	12	12	lineation stretch shape mylonitic Description			-1705.81
JES-05-272	JES-05-272	32.3067	-110.749	3.57446e+06	523594		2005-01-28	Soldier Cyn, lower, west ridge	JES-05-272	249	69	13	13	lineation stretch shape mylonitic Description			-2133.91
JES-05-278	JES-05-278	32.3154	-110.747	3.57543e+06	523797		2005-01-28	Soldier Cyn, lower, west ridge	JES-05-278	249	69	9	9	lineation stretch shape mylonitic Description			-1134.85
JES-04-791	JES-04-791	32.3111	-110.722	3.57495e+06	526154		2004-04-23	Babad Do'ag - Hwy NE	JES-04-791	250	70	14	14	ml, Mineral lineation, plunging			-1214.36
JES-04-805	JES-04-805	32.3113	-110.715	3.57497e+06	526860		2004-04-23	Babad Do'ag - Hwy NE	JES-04-805	250	70	10	10	ml, Mineral lineation, plunging			-1076.9
JES-05-480	JES-05-480	32.3181	-110.806	3.57572e+06	518296		2005-03-04	Sabino Cyn, east side (Blackett)	JES-05-480	250	70	18	18	lineation stretch shape mylonitic Description			-1770.89
JES-05-484	JES-05-484	32.3215	-110.802	3.57609e+06	518609		2005-03-04	Sabino Cyn, east side (Blackett)	JES-05-484	250	70	13	13	lineation stretch shape mylonitic Description			-1347.37
JES-05-490	JES-05-490	32.3248	-110.793	3.57646e+06	519529		2005-03-04	Sabino Cyn, east side (Blackett)	JES-05-490	250	70	10	10	lineation stretch shape mylonitic Description			-818.994
JES-05-330	JES-05-330	32.3196	-110.806	3.57588e+06	518214		2005-02-03	Sabino Cyn, phoneline trail	JES-05-330	250	70	7	7	lineation mylonitic stretch shape directed Description			-1621.65
JES-05-316	JES-05-316	32.3285	-110.79	3.57686e+06	519761		2005-02-03	Sabino Cyn, phoneline trail	JES-05-316	250	70	10	10	lineation stretch shape mylonitic Description			-378.069
JES-05-342	JES-05-342	32.3091	-110.813	3.57471e+06	517559		2005-02-03	Sabino Cyn, phoneline trail	JES-05-342	250	70	17	17	lineation stretch shape mylonitic Description			-2899.56
JES-05-459	JES-05-459	32.3293	-110.805	3.57696e+06	518339		2005-02-27	Sabino Cyn, west side	JES-05-459	250	70	19	19	lineation stretch shape mylonitic Description			-522.671
JES-05-468	JES-05-468	32.3224	-110.814	3.57619e+06	517552		2005-02-27	Sabino Cyn, west side	JES-05-468	250	70	22	22	lineation stretch shape mylonitic Description			-1420.72
JES-05-275	JES-05-275	32.3131	-110.747	3.57517e+06	523801		2005-01-28	Soldier Cyn, lower, west ridge	JES-05-275	250	70	9	9	lineation stretch shape mylonitic Description			-1397.17
JES-05-281	JES-05-281	32.3194	-110.748	3.57587e+06	523715		2005-01-28	Soldier Cyn, lower, west ridge	JES-05-281	250	70	5	5	lineation stretch shape mylonitic Description			-704.605
JES-05-282	JES-05-282	32.3208	-110.748	3.57602e+06	523737		2005-01-28	Soldier Cyn, lower, west ridge	JES-05-282	250	70	6	6	lineation stretch shape mylonitic Description			-554.914
JES-05-294	JES-05-294	32.3067	-110.751	3.57446e+06	523416		2005-01-28	Soldier Cyn, lower, west ridge	JES-05-294	250	70	13	13	lineation stretch shape mylonitic Description			-2168.78
JES-05-253	JES-05-253	32.3207	-110.713	3.57602e+06	526975		2005-01-25	Babad Do'ag N	JES-05-253	251	71	4	4	lineation stretch shape mylonitic Description			-6.59773
JES-04-772	JES-04-772	32.3088	-110.735	3.5747e+06	524967		2004-04-19	Lower Mt. Lemmon Hwy	JES-04-772	251	71	19	19	lt, Lineation, generic tectonic			-1667.53
JES-04-840	JES-04-840	32.3167	-110.708	3.57558e+06	527528		2004-04-28	Molino Canyon - middle	JES-04-840	251	71	14	14	ml, Mineral lineation, plunging			-354.81
JES-05-476	JES-05-476	32.3078	-110.811	3.57457e+06	517830		2005-03-04	Sabino Cyn, east side (Blackett)	JES-05-476	251	71	20	20	lineation stretch shape mylonitic Description			-2992.09
JES-05-487	JES-05-487	32.3238	-110.797	3.57635e+06	519081		2005-03-04	Sabino Cyn, east side (Blackett)	JES-05-487	251	71	19	19	lineation stretch shape mylonitic Description			-1009.17
JES-05-489	JES-05-489	32.3244	-110.793	3.57642e+06	519450		2005-03-04	Sabino Cyn, east side (Blackett)	JES-05-489	251	71	11	11	lineation stretch shape mylonitic Description			-877.25
JES-05-328	JES-05-328	32.3218	-110.806	3.57613e+06	518278		2005-02-03	Sabino Cyn, phoneline trail	JES-05-328	251	71	10	10	lineation stretch shape mylonitic Description			-1362.91
JES-05-352	JES-05-352	32.3128	-110.818	3.57513e+06	517103		2005-02-03	Sabino Cyn, phoneline trail	JES-05-352	251	71	18	18	lineation stretch shape mylonitic Description			-2560.07
JES-05-470	JES-05-470	32.3183	-110.814	3.57574e+06	517491		2005-02-27	Sabino Cyn, west side	JES-05-470	251	71	11	11	lineation stretch shape mylonitic Description			-1885.96
JES-05-474	JES-05-474	32.3162	-110.819	3.5755e+06	517035		2005-02-27	Sabino Cyn, west side	JES-05-474	251	71	14	14	lineation stretch shape mylonitic Description			-2197.48
JES-05-269	JES-05-269	32.306	-110.747	3.57438e+06	523854		2005-01-28	Soldier Cyn, lower, west ridge	JES-05-269	251	71	9	9	lineation stretch shape mylonitic Description			-2174.28
JES-05-270	JES-05-270	32.3061	-110.748	3.57439e+06	523757		2005-01-28	Soldier Cyn, lower, west ridge	JES-05-270	251	71	9	9	lineation stretch shape mylonitic Description			-2178.56
JES-05-249	JES-05-249	32.318	-110.717	3.57572e+06	526685		2005-01-25	Babad Do'ag N	JES-05-249	253	73	9	9	lineation stretch shape mylonitic Description			-364.259
JES-05-483	JES-05-483	32.3213	-110.803	3.57606e+06	518528		2005-03-04	Sabino Cyn, east side (Blackett)	JES-05-483	253	73	14	14	lineation stretch shape mylonitic Description			-1385.96
JES-05-105	JES-05-105	32.3131	-110.714	3.57518e+06	526945		2004-11-10	lower Molino Cyn	JES-05-105	254	74	9	9	lineation stretch shape mylonitic Description			-854.635
JES-05-347	JES-05-347	32.3106	-110.817	3.57488e+06	517232		2005-02-03	Sabino Cyn, phoneline trail	JES-05-347	254	74	16	16	lineation stretch shape mylonitic Description			-2787.43
JES-05-104	JES-05-104	32.3136	-110.712	3.57523e+06	527070		2004-11-10	lower Molino Cyn	JES-05-104	255	75	9	9	lineation stretch shape mylonitic Description			-782.661
JES-05-183	JES-05-183	32.3174	-110.745	3.57565e+06	523963		2004-12-30	Lower Soldier Cyn	JES-05-183	255	75	2	2	lineation stretch shape mylonitic Description			-889.992
JES-05-472	JES-05-472	32.3166	-110.818	3.57554e+06	517152		2005-02-27	Sabino Cyn, west side	JES-05-472	255	75	17	17	lineation stretch shape mylonitic Description			-2134.84
JES-05-471	JES-05-471	32.3173	-110.817	3.57563e+06	517263		2005-02-27	Sabino Cyn, west side	JES-05-471	256	76	11	11	lineation stretch shape mylonitic Description			-2035.22
JES-05-350	JES-05-350	32.3121	-110.819	3.57505e+06	517085		2005-02-03	Sabino Cyn, phoneline trail	JES-05-350	257	77	18	18	lineation stretch shape mylonitic Description			-2642.09
JES-04-778	JES-04-778	32.3107	-110.741	3.5749e+06	524348		2004-04-19	Lower Mt. Lemmon Hwy	JES-04-778	258	78	10	10	ml, Mineral lineation, plunging			-1569.39
JES-05-098	JES-05-098	32.3127	-110.709	3.57513e+06	527394		2004-11-10	lower Molino Cyn	JES-05-098	259	79	2	2	lineation stretch shape mylonitic Description			-831.297
JES-05-268	JES-05-268	32.3053	-110.746	3.5743e+06	523947		2005-01-28	Soldier Cyn, lower, west ridge	JES-05-268	262	82	14	14	lineation stretch shape mylonitic Description			-2238.68
JES-19-084	JES-19-084	32.3775	-110.703	3582324	527954	NAD83	2019-05-11	Lizard Rock	JES-19-084	218.7	38.7	3	3	mylonitic lineation	trend and plunge		6457.7	trend derived from several measurements
JES-19-085	JES-19-085			3582307	527909	NAD83	2019-05-11	Lizard Rock	JES-19-085	223	43	3	3	mylonitic lineation	trend and plunge		6433.15
JES-19-086	JES-19-086			3582232	527882	NAD83	2019-05-11	Lizard Rock	JES-19-086	38	38	1	-1	mylonitic lineation	trend and plunge		6353.61
JES-19-087	JES-19-087			3582171	527863	NAD83	2019-05-11	Lizard Rock	JES-19-087	219	39	4	4	mylonitic lineation	trend and plunge		6289.43
JES-19-087.5	JES-19-087.5			3582602	528410	NAD83	2019-05-11	Lizard Rock	JES-19-087.5	30.75	30.75	2	-2	mylonitic lineation	trend and plunge		6812.21	trend derived from several measurements
JES-19-088	JES-19-088			3582552	528410	NAD83	2019-05-11	Lizard Rock	JES-19-088	212	32	15	15	mylonitic lineation	trend and plunge		6762.21
JES-19-089	JES-19-089			3582563	528484	NAD83	2019-05-11	Lizard Rock	JES-19-089	40.5	40.5	12	-12	mylonitic lineation	trend and plunge		6785.63	trend derived from several measurements
JES-19-090	JES-19-090			3583477	527485	NAD83	2019-05-11	Rose Canyon Lake	JES-19-090	36	36	11	-11	mylonitic lineation	trend and plunge		7532
JES-19-091	JES-19-091			3583522	527368	NAD83	2019-05-11	Rose Canyon Lake	JES-19-091	39	39	6.6	-6.6	mylonitic lineation	trend and plunge		7557.37	trend derived from several measurements

## Sheet: Molino Basin
StationId	ID	Lat	Long	UtmN	UtmE	UtmDatum	UtmZone	UTMN 27	UTME 27	DateVisited	area	StationID	Trend (strike)	Plunge (dip)	Type	Shear sense	Group
JES-04-475	JES-04-475	32.3379	-110.683	3.57793e+06	529833	NAD83	Z12	3577734	529894	2004-03-18	Molino basin near E	JES-04-475	43	7	lt, Lineation, generic tectonic		Molino-Soldier
JES-04-477	JES-04-477	32.3374	-110.682	3.57788e+06	529917	NAD83	Z12	3577680	529978	2004-03-18	Molino basin near E	JES-04-477	44	17	lt, Lineation, generic tectonic		Molino-Soldier
JES-04-478	JES-04-478	32.336	-110.682	3.57772e+06	529952	NAD83	Z12	3577527	530013	2004-03-18	Molino basin near E	JES-04-478	45	24	lt, Lineation, generic tectonic		Molino-Soldier
JES-04-483	JES-04-483	32.3354	-110.681	3.57766e+06	530036	NAD83	Z12	3577462	530097	2004-03-18	Molino basin near E	JES-04-483	44	12	lt, Lineation, generic tectonic		Molino-Soldier
JES-04-508	JES-04-508	32.333	-110.695	3.57739e+06	528751	NAD83	Z12	3577188	528812	2004-03-18	Molino basin near E	JES-04-508	50	18	lt, Lineation, generic tectonic		Molino-Soldier
JES-04-755	JES-04-755	32.3411	-110.684	3.57829e+06	529760	NAD83	Z12	3578091	529821	2004-04-19	Molino basin near E	JES-04-755	42	17	lt, Lineation, generic tectonic		Molino-Soldier
JES-04-761	JES-04-761	32.3458	-110.68	3.57881e+06	530080	NAD83	Z12	3578614	530141	2004-04-19	Molino basin near E	JES-04-761	30	11	lt, Lineation, generic tectonic		Molino-Soldier
JES-04-762	JES-04-762	32.3457	-110.68	3.5788e+06	530106	NAD83	Z12	3578598	530167	2004-04-19	Molino basin near E	JES-04-762	34	10	lt, Lineation, generic tectonic		Molino-Soldier
JES-04-764	JES-04-764	32.3479	-110.678	3.57905e+06	530277	NAD83	Z12	3578848	530338	2004-04-19	Molino basin near E	JES-04-764	32	10	lt, Lineation, generic tectonic		Molino-Soldier
JES-04-464	JES-04-464	32.3369	-110.688	3.57782e+06	529354	NAD83	Z12	3577623	529415	2004-03-18	Molino basin near E	JES-04-464	42	18	ml, Mineral lineation, plunging		Molino-Soldier
JES-04-465	JES-04-465	32.337	-110.687	3.57783e+06	529412	NAD83	Z12	3577635	529473	2004-03-18	Molino basin near E	JES-04-465	39	20	ml, Mineral lineation, plunging		Molino-Soldier
JES-04-466	JES-04-466	32.3371	-110.687	3.57784e+06	529497	NAD83	Z12	3577643	529558	2004-03-18	Molino basin near E	JES-04-466	37	26	ml, Mineral lineation, plunging		Molino-Soldier
JES-04-467	JES-04-467	32.3377	-110.686	3.57792e+06	529571	NAD83	Z12	3577719	529632	2004-03-18	Molino basin near E	JES-04-467	45	15	ml, Mineral lineation, plunging		Molino-Soldier
JES-04-468	JES-04-468	32.3378	-110.685	3.57792e+06	529626	NAD83	Z12	3577722	529687	2004-03-18	Molino basin near E	JES-04-468	223	4	ml, Mineral lineation, plunging		Molino-Soldier
JES-04-469	JES-04-469	32.3373	-110.685	3.57786e+06	529635	NAD83	Z12	3577666	529696	2004-03-18	Molino basin near E	JES-04-469	37	9	ml, Mineral lineation, plunging		Molino-Soldier
JES-04-470	JES-04-470	32.3377	-110.684	3.57791e+06	529742	NAD83	Z12	3577714	529803	2004-03-18	Molino basin near E	JES-04-470	49	19	ml, Mineral lineation, plunging		Molino-Soldier
JES-04-471	JES-04-471	32.3377	-110.684	3.57791e+06	529764	NAD83	Z12	3577711	529825	2004-03-18	Molino basin near E	JES-04-471	48	8	ml, Mineral lineation, plunging		Molino-Soldier
JES-04-472	JES-04-472	32.338	-110.683	3.57794e+06	529811	NAD83	Z12	3577744	529872	2004-03-18	Molino basin near E	JES-04-472	50	3	ml, Mineral lineation, plunging		Molino-Soldier
JES-04-473	JES-04-473	32.3375	-110.683	3.5779e+06	529791	NAD83	Z12	3577698	529852	2004-03-18	Molino basin near E	JES-04-473	45	19	ml, Mineral lineation, plunging		Molino-Soldier
JES-04-474	JES-04-474	32.3375	-110.683	3.57789e+06	529815	NAD83	Z12	3577690	529876	2004-03-18	Molino basin near E	JES-04-474	49	4	ml, Mineral lineation, plunging		Molino-Soldier
JES-04-476	JES-04-476	32.3377	-110.683	3.57791e+06	529879	NAD83	Z12	3577713	529940	2004-03-18	Molino basin near E	JES-04-476	50	10	ml, Mineral lineation, plunging		Molino-Soldier
JES-04-479	JES-04-479	32.3357	-110.681	3.57769e+06	529990	NAD83	Z12	3577491	530051	2004-03-18	Molino basin near E	JES-04-479	39	12	ml, Mineral lineation, plunging		Molino-Soldier
JES-04-480	JES-04-480	32.3352	-110.682	3.57763e+06	529953	NAD83	Z12	3577437	530014	2004-03-18	Molino basin near E	JES-04-480	49	2	ml, Mineral lineation, plunging		Molino-Soldier
JES-04-481	JES-04-481	32.335	-110.682	3.57762e+06	529955	NAD83	Z12	3577419	530016	2004-03-18	Molino basin near E	JES-04-481	45	7	ml, Mineral lineation, plunging		Molino-Soldier
JES-04-482	JES-04-482	32.3354	-110.681	3.57766e+06	530023	NAD83	Z12	3577463	530084	2004-03-18	Molino basin near E	JES-04-482	42	13	ml, Mineral lineation, plunging		Molino-Soldier
JES-04-484	JES-04-484	32.3357	-110.681	3.57769e+06	530054	NAD83	Z12	3577493	530115	2004-03-18	Molino basin near E	JES-04-484	44	6	ml, Mineral lineation, plunging		Molino-Soldier
JES-04-486	JES-04-486	32.3356	-110.68	3.57768e+06	530090	NAD83	Z12	3577479	530151	2004-03-18	Molino basin near E	JES-04-486	48	11	ml, Mineral lineation, plunging		Molino-Soldier
JES-04-487	JES-04-487	32.3353	-110.68	3.57764e+06	530099	NAD83	Z12	3577446	530160	2004-03-18	Molino basin near E	JES-04-487	52	8	ml, Mineral lineation, plunging		Molino-Soldier
JES-04-488	JES-04-488	32.3352	-110.68	3.57763e+06	530099	NAD83	Z12	3577434	530160	2004-03-18	Molino basin near E	JES-04-488	42	14	ml, Mineral lineation, plunging		Molino-Soldier
JES-04-489	JES-04-489	32.335	-110.68	3.57762e+06	530132	NAD83	Z12	3577420	530193	2004-03-18	Molino basin near E	JES-04-489	41	2	ml, Mineral lineation, plunging		Molino-Soldier
JES-04-490	JES-04-490	32.3343	-110.68	3.57754e+06	530117	NAD83	Z12	3577343	530178	2004-03-18	Molino basin near E	JES-04-490	42	7	ml, Mineral lineation, plunging		Molino-Soldier
JES-04-491	JES-04-491	32.3342	-110.681	3.57752e+06	530066	NAD83	Z12	3577323	530127	2004-03-18	Molino basin near E	JES-04-491	45	18	ml, Mineral lineation, plunging		Molino-Soldier
JES-04-492	JES-04-492	32.3337	-110.681	3.57747e+06	530049	NAD83	Z12	3577273	530110	2004-03-18	Molino basin near E	JES-04-492	47	6	ml, Mineral lineation, plunging		Molino-Soldier
JES-04-493	JES-04-493	32.332	-110.681	3.57728e+06	529980	NAD83	Z12	3577081	530041	2004-03-18	Molino basin near E	JES-04-493	45	12	ml, Mineral lineation, plunging		Molino-Soldier
JES-04-494	JES-04-494	32.3316	-110.682	3.57724e+06	529965	NAD83	Z12	3577042	530026	2004-03-18	Molino basin near E	JES-04-494	47	14	ml, Mineral lineation, plunging		Molino-Soldier
JES-04-495	JES-04-495	32.3313	-110.682	3.57721e+06	529919	NAD83	Z12	3577010	529980	2004-03-18	Molino basin near E	JES-04-495	49	12	ml, Mineral lineation, plunging		Molino-Soldier
JES-04-496	JES-04-496	32.3312	-110.683	3.57719e+06	529853	NAD83	Z12	3576990	529914	2004-03-18	Molino basin near E	JES-04-496	49	8	ml, Mineral lineation, plunging		Molino-Soldier
JES-04-497	JES-04-497	32.3316	-110.685	3.57723e+06	529651	NAD83	Z12	3577037	529712	2004-03-18	Molino basin near E	JES-04-497	51	11	ml, Mineral lineation, plunging		Molino-Soldier
JES-04-498	JES-04-498	32.3317	-110.685	3.57725e+06	529615	NAD83	Z12	3577054	529676	2004-03-18	Molino basin near E	JES-04-498	57	9	ml, Mineral lineation, plunging		Molino-Soldier
JES-04-499	JES-04-499	32.3318	-110.686	3.57726e+06	529551	NAD83	Z12	3577061	529612	2004-03-18	Molino basin near E	JES-04-499	53	9	ml, Mineral lineation, plunging		Molino-Soldier
JES-04-500	JES-04-500	32.3316	-110.688	3.57724e+06	529399	NAD83	Z12	3577042	529460	2004-03-18	Molino basin near E	JES-04-500	49	17	ml, Mineral lineation, plunging		Molino-Soldier
JES-04-501	JES-04-501	32.3313	-110.689	3.5772e+06	529295	NAD83	Z12	3577003	529356	2004-03-18	Molino basin near E	JES-04-501	52	10	ml, Mineral lineation, plunging		Molino-Soldier
JES-04-502	JES-04-502	32.3314	-110.689	3.57721e+06	529287	NAD83	Z12	3577016	529348	2004-03-18	Molino basin near E	JES-04-502	48	8	ml, Mineral lineation, plunging		Molino-Soldier
JES-04-503	JES-04-503	32.3313	-110.689	3.57721e+06	529241	NAD83	Z12	3577009	529302	2004-03-18	Molino basin near E	JES-04-503	54	14	ml, Mineral lineation, plunging		Molino-Soldier
JES-04-504	JES-04-504	32.3314	-110.69	3.57722e+06	529154	NAD83	Z12	3577019	529215	2004-03-18	Molino basin near E	JES-04-504	52	20	ml, Mineral lineation, plunging		Molino-Soldier
JES-04-505	JES-04-505	32.3315	-110.691	3.57723e+06	529064	NAD83	Z12	3577030	529125	2004-03-18	Molino basin near E	JES-04-505	51	15	ml, Mineral lineation, plunging		Molino-Soldier
JES-04-506	JES-04-506	32.3317	-110.691	3.57724e+06	529052	NAD83	Z12	3577046	529113	2004-03-18	Molino basin near E	JES-04-506	51	18	ml, Mineral lineation, plunging		Molino-Soldier
JES-04-507	JES-04-507	32.3324	-110.693	3.57733e+06	528898	NAD83	Z12	3577129	528959	2004-03-18	Molino basin near E	JES-04-507	50	20	ml, Mineral lineation, plunging		Molino-Soldier
JES-04-509	JES-04-509	32.3344	-110.695	3.57755e+06	528713	NAD83	Z12	3577348	528774	2004-03-18	Molino basin near E	JES-04-509	44	19	ml, Mineral lineation, plunging		Molino-Soldier
JES-04-510	JES-04-510	32.3354	-110.694	3.57766e+06	528838	NAD83	Z12	3577458	528899	2004-03-18	Molino basin near E	JES-04-510	53	18	ml, Mineral lineation, plunging		Molino-Soldier
JES-04-511	JES-04-511	32.3363	-110.692	3.57775e+06	528949	NAD83	Z12	3577556	529010	2004-03-18	Molino basin near E	JES-04-511	47	20	ml, Mineral lineation, plunging		Molino-Soldier
JES-04-752	JES-04-752	32.34	-110.686	3.57816e+06	529523	NAD83	Z12	3577964	529584	2004-04-19	Molino basin near E	JES-04-752	38	15	ml, Mineral lineation, plunging		Molino-Soldier
JES-04-756	JES-04-756	32.3423	-110.684	3.57842e+06	529769	NAD83	Z12	3578221	529830	2004-04-19	Molino basin near E	JES-04-756	41	26	ml, Mineral lineation, plunging		Molino-Soldier
JES-04-758	JES-04-758	32.3445	-110.683	3.57866e+06	529841	NAD83	Z12	3578465	529902	2004-04-19	Molino basin near E	JES-04-758	41	11	ml, Mineral lineation, plunging		Molino-Soldier
JES-04-759	JES-04-759	32.3447	-110.682	3.57868e+06	529916	NAD83	Z12	3578486	529977	2004-04-19	Molino basin near E	JES-04-759	40	8	ml, Mineral lineation, plunging		Molino-Soldier
JES-04-760	JES-04-760	32.3449	-110.681	3.57871e+06	529979	NAD83	Z12	3578513	530040	2004-04-19	Molino basin near E	JES-04-760	25	16	ml, Mineral lineation, plunging		Molino-Soldier
JES-04-475	JES-04-475	32.3379	-110.683	3.57793e+06	529833	NAD83	Z12	3577734	529894	2004-03-18	Molino basin near E	JES-04-475	317	6	myg, Mylonitic foliation, generic		Molino-Soldier
JES-04-477	JES-04-477	32.3374	-110.682	3.57788e+06	529917	NAD83	Z12	3577680	529978	2004-03-18	Molino basin near E	JES-04-477	353	10	myg, Mylonitic foliation, generic		Molino-Soldier
JES-04-478	JES-04-478	32.336	-110.682	3.57772e+06	529952	NAD83	Z12	3577527	530013	2004-03-18	Molino basin near E	JES-04-478	334	20	myg, Mylonitic foliation, generic		Molino-Soldier
JES-04-483	JES-04-483	32.3354	-110.681	3.57766e+06	530036	NAD83	Z12	3577462	530097	2004-03-18	Molino basin near E	JES-04-483	356	12	myg, Mylonitic foliation, generic		Molino-Soldier
JES-04-508	JES-04-508	32.333	-110.695	3.57739e+06	528751	NAD83	Z12	3577188	528812	2004-03-18	Molino basin near E	JES-04-508	306	21	myg, Mylonitic foliation, generic		Molino-Soldier
JES-04-753	JES-04-753	32.3404	-110.685	3.57821e+06	529621	NAD83	Z12	3578012	529682	2004-04-19	Molino basin near E	JES-04-753	285	22	myg, Mylonitic foliation, generic		Molino-Soldier
JES-04-754	JES-04-754	32.3403	-110.684	3.5782e+06	529706	NAD83	Z12	3577999	529767	2004-04-19	Molino basin near E	JES-04-754	292	20	myg, Mylonitic foliation, generic		Molino-Soldier
JES-04-755	JES-04-755	32.3411	-110.684	3.57829e+06	529760	NAD83	Z12	3578091	529821	2004-04-19	Molino basin near E	JES-04-755	340	20	myg, Mylonitic foliation, generic		Molino-Soldier
JES-04-757	JES-04-757	32.3434	-110.684	3.57855e+06	529714	NAD83	Z12	3578350	529775	2004-04-19	Molino basin near E	JES-04-757	340	23	myg, Mylonitic foliation, generic		Molino-Soldier
JES-04-761	JES-04-761	32.3458	-110.68	3.57881e+06	530080	NAD83	Z12	3578614	530141	2004-04-19	Molino basin near E	JES-04-761	359	22	myg, Mylonitic foliation, generic		Molino-Soldier
JES-04-762	JES-04-762	32.3457	-110.68	3.5788e+06	530106	NAD83	Z12	3578598	530167	2004-04-19	Molino basin near E	JES-04-762	351	21	myg, Mylonitic foliation, generic		Molino-Soldier
JES-04-763	JES-04-763	32.3464	-110.68	3.57887e+06	530148	NAD83	Z12	3578677	530209	2004-04-19	Molino basin near E	JES-04-763	0	20	myg, Mylonitic foliation, generic		Molino-Soldier
JES-04-764	JES-04-764	32.3479	-110.678	3.57905e+06	530277	NAD83	Z12	3578848	530338	2004-04-19	Molino basin near E	JES-04-764	340	22	myg, Mylonitic foliation, generic		Molino-Soldier
JES-04-753	JES-04-753	32.3404	-110.685	3.57821e+06	529621	NAD83	Z12	3578012	529682	2004-04-19	Molino basin near E	JES-04-753	40	20	sld, stretching lineation, directed down-plunge	NE	Molino-Soldier
JES-04-754	JES-04-754	32.3403	-110.684	3.5782e+06	529706	NAD83	Z12	3577999	529767	2004-04-19	Molino basin near E	JES-04-754	39	19	sld, stretching lineation, directed down-plunge	NE	Molino-Soldier
JES-04-757	JES-04-757	32.3434	-110.684	3.57855e+06	529714	NAD83	Z12	3578350	529775	2004-04-19	Molino basin near E	JES-04-757	35	12	sld, stretching lineation, directed down-plunge	NE	Molino-Soldier
JES-04-763	JES-04-763	32.3464	-110.68	3.57887e+06	530148	NAD83	Z12	3578677	530209	2004-04-19	Molino basin near E	JES-04-763	37	9	sld, stretching lineation, directed down-plunge	NE	Molino-Soldier

## Sheet: Molino-Bellota
StationId	ID	Lat	Long	UtmN	UtmE	UtmDatum	UtmZone	UTMN 27	UTME 27	DateVisited	area	StationID	Trend (strike)	Plunge (dip)	Type	type 2	Shear sense	Group	CartoObjID
JES-04-464	JES-04-464	32.3369	-110.688	3.57782e+06	529354			3577623	529415	2004-03-18	Molino basin ridge to E	JES-04-464	42	18	ml, Mineral lineation, plunging			Molino-Soldier
JES-04-465	JES-04-465	32.337	-110.687	3.57783e+06	529412			3577635	529473	2004-03-18	Molino basin ridge to E	JES-04-465	39	20	ml, Mineral lineation, plunging			Molino-Soldier
JES-04-466	JES-04-466	32.3371	-110.687	3.57784e+06	529497			3577643	529558	2004-03-18	Molino basin ridge to E	JES-04-466	37	26	ml, Mineral lineation, plunging			Molino-Soldier
JES-04-467	JES-04-467	32.3377	-110.686	3.57792e+06	529571			3577719	529632	2004-03-18	Molino basin ridge to E	JES-04-467	45	15	ml, Mineral lineation, plunging			Molino-Soldier
JES-04-468	JES-04-468	32.3378	-110.685	3.57792e+06	529626			3577722	529687	2004-03-18	Molino basin ridge to E	JES-04-468	223	4	ml, Mineral lineation, plunging			Molino-Soldier
JES-04-469	JES-04-469	32.3373	-110.685	3.57786e+06	529635			3577666	529696	2004-03-18	Molino basin ridge to E	JES-04-469	37	9	ml, Mineral lineation, plunging			Molino-Soldier
JES-04-470	JES-04-470	32.3377	-110.684	3.57791e+06	529742			3577714	529803	2004-03-18	Molino basin ridge to E	JES-04-470	49	19	ml, Mineral lineation, plunging			Molino-Soldier
JES-04-471	JES-04-471	32.3377	-110.684	3.57791e+06	529764			3577711	529825	2004-03-18	Molino basin ridge to E	JES-04-471	48	8	ml, Mineral lineation, plunging			Molino-Soldier
JES-04-472	JES-04-472	32.338	-110.683	3.57794e+06	529811			3577744	529872	2004-03-18	Molino basin ridge to E	JES-04-472	50	3	ml, Mineral lineation, plunging			Molino-Soldier
JES-04-473	JES-04-473	32.3375	-110.683	3.5779e+06	529791			3577698	529852	2004-03-18	Molino basin ridge to E	JES-04-473	45	19	ml, Mineral lineation, plunging			Molino-Soldier
JES-04-474	JES-04-474	32.3375	-110.683	3.57789e+06	529815			3577690	529876	2004-03-18	Molino basin ridge to E	JES-04-474	49	4	ml, Mineral lineation, plunging			Molino-Soldier
JES-04-475	JES-04-475	32.3379	-110.683	3.57793e+06	529833			3577734	529894	2004-03-18	Molino basin ridge to E	JES-04-475	43	7	lt, Lineation, generic tectonic			Molino-Soldier
JES-04-476	JES-04-476	32.3377	-110.683	3.57791e+06	529879			3577713	529940	2004-03-18	Molino basin ridge to E	JES-04-476	50	10	ml, Mineral lineation, plunging			Molino-Soldier
JES-04-477	JES-04-477	32.3374	-110.682	3.57788e+06	529917			3577680	529978	2004-03-18	Molino basin ridge to E	JES-04-477	44	17	lt, Lineation, generic tectonic			Molino-Soldier
JES-04-478	JES-04-478	32.336	-110.682	3.57772e+06	529952			3577527	530013	2004-03-18	Molino basin ridge to E	JES-04-478	45	24	lt, Lineation, generic tectonic	Ethan Perry collected two oriented samples here		Molino-Soldier
JES-04-479	JES-04-479	32.3357	-110.681	3.57769e+06	529990			3577491	530051	2004-03-18	Molino basin ridge to E	JES-04-479	39	12	ml, Mineral lineation, plunging			Molino-Soldier
JES-04-480	JES-04-480	32.3352	-110.682	3.57763e+06	529953			3577437	530014	2004-03-18	Molino basin ridge to E	JES-04-480	49	2	ml, Mineral lineation, plunging			Molino-Soldier
JES-04-481	JES-04-481	32.335	-110.682	3.57762e+06	529955			3577419	530016	2004-03-18	Molino basin ridge to E	JES-04-481	45	7	ml, Mineral lineation, plunging			Molino-Soldier
JES-04-482	JES-04-482	32.3354	-110.681	3.57766e+06	530023			3577463	530084	2004-03-18	Molino basin ridge to E	JES-04-482	42	13	ml, Mineral lineation, plunging			Molino-Soldier
JES-04-483	JES-04-483	32.3354	-110.681	3.57766e+06	530036			3577462	530097	2004-03-18	Molino basin ridge to E	JES-04-483	44	12	lt, Lineation, generic tectonic			Molino-Soldier
JES-04-484	JES-04-484	32.3357	-110.681	3.57769e+06	530054			3577493	530115	2004-03-18	Molino basin ridge to E	JES-04-484	44	6	ml, Mineral lineation, plunging			Molino-Soldier
JES-04-486	JES-04-486	32.3356	-110.68	3.57768e+06	530090			3577479	530151	2004-03-18	Molino basin ridge to E	JES-04-486	48	11	ml, Mineral lineation, plunging			Molino-Soldier
JES-04-487	JES-04-487	32.3353	-110.68	3.57764e+06	530099			3577446	530160	2004-03-18	Molino basin ridge to E	JES-04-487	52	8	ml, Mineral lineation, plunging			Molino-Soldier
JES-04-488	JES-04-488	32.3352	-110.68	3.57763e+06	530099			3577434	530160	2004-03-18	Molino basin ridge to E	JES-04-488	42	14	ml, Mineral lineation, plunging			Molino-Soldier
JES-04-489	JES-04-489	32.335	-110.68	3.57762e+06	530132			3577420	530193	2004-03-18	Molino basin ridge to E	JES-04-489	41	2	ml, Mineral lineation, plunging			Molino-Soldier
JES-04-490	JES-04-490	32.3343	-110.68	3.57754e+06	530117			3577343	530178	2004-03-18	Molino basin ridge to E	JES-04-490	42	7	ml, Mineral lineation, plunging			Molino-Soldier
JES-04-491	JES-04-491	32.3342	-110.681	3.57752e+06	530066			3577323	530127	2004-03-18	Molino basin ridge to E	JES-04-491	45	18	ml, Mineral lineation, plunging			Molino-Soldier
JES-04-492	JES-04-492	32.3337	-110.681	3.57747e+06	530049			3577273	530110	2004-03-18	Molino basin ridge to E	JES-04-492	47	6	ml, Mineral lineation, plunging			Molino-Soldier
JES-04-493	JES-04-493	32.332	-110.681	3.57728e+06	529980			3577081	530041	2004-03-18	Molino basin ridge to E	JES-04-493	45	12	ml, Mineral lineation, plunging			Molino-Soldier
JES-04-494	JES-04-494	32.3316	-110.682	3.57724e+06	529965			3577042	530026	2004-03-18	Molino basin ridge to E	JES-04-494	47	14	ml, Mineral lineation, plunging			Molino-Soldier
JES-04-495	JES-04-495	32.3313	-110.682	3.57721e+06	529919			3577010	529980	2004-03-18	Molino basin ridge to E	JES-04-495	49	12	ml, Mineral lineation, plunging			Molino-Soldier
JES-04-496	JES-04-496	32.3312	-110.683	3.57719e+06	529853			3576990	529914	2004-03-18	Molino basin ridge to E	JES-04-496	49	8	ml, Mineral lineation, plunging			Molino-Soldier
JES-04-497	JES-04-497	32.3316	-110.685	3.57723e+06	529651			3577037	529712	2004-03-18	Molino basin ridge to E	JES-04-497	51	11	ml, Mineral lineation, plunging			Molino-Soldier
JES-04-498	JES-04-498	32.3317	-110.685	3.57725e+06	529615			3577054	529676	2004-03-18	Molino basin ridge to E	JES-04-498	57	9	ml, Mineral lineation, plunging			Molino-Soldier
JES-04-499	JES-04-499	32.3318	-110.686	3.57726e+06	529551			3577061	529612	2004-03-18	Molino basin ridge to E	JES-04-499	53	9	ml, Mineral lineation, plunging			Molino-Soldier
JES-04-500	JES-04-500	32.3316	-110.688	3.57724e+06	529399			3577042	529460	2004-03-18	Molino basin ridge to E	JES-04-500	49	17	ml, Mineral lineation, plunging			Molino-Soldier
JES-04-501	JES-04-501	32.3313	-110.689	3.5772e+06	529295			3577003	529356	2004-03-18	Molino basin ridge to E	JES-04-501	52	10	ml, Mineral lineation, plunging			Molino-Soldier
JES-04-502	JES-04-502	32.3314	-110.689	3.57721e+06	529287			3577016	529348	2004-03-18	Molino basin ridge to E	JES-04-502	48	8	ml, Mineral lineation, plunging			Molino-Soldier
JES-04-503	JES-04-503	32.3313	-110.689	3.57721e+06	529241			3577009	529302	2004-03-18	Molino basin ridge to E	JES-04-503	54	14	ml, Mineral lineation, plunging			Molino-Soldier
JES-04-504	JES-04-504	32.3314	-110.69	3.57722e+06	529154			3577019	529215	2004-03-18	Molino basin ridge to E	JES-04-504	52	20	ml, Mineral lineation, plunging			Molino-Soldier
JES-04-505	JES-04-505	32.3315	-110.691	3.57723e+06	529064			3577030	529125	2004-03-18	Molino basin ridge to E	JES-04-505	51	15	ml, Mineral lineation, plunging			Molino-Soldier
JES-04-506	JES-04-506	32.3317	-110.691	3.57724e+06	529052			3577046	529113	2004-03-18	Molino basin ridge to E	JES-04-506	51	18	ml, Mineral lineation, plunging			Molino-Soldier
JES-04-507	JES-04-507	32.3324	-110.693	3.57733e+06	528898			3577129	528959	2004-03-18	Molino basin ridge to E	JES-04-507	50	20	ml, Mineral lineation, plunging			Molino-Soldier
JES-04-508	JES-04-508	32.333	-110.695	3.57739e+06	528751			3577188	528812	2004-03-18	Molino basin ridge to E	JES-04-508	50	18	lt, Lineation, generic tectonic			Molino-Soldier
JES-04-509	JES-04-509	32.3344	-110.695	3.57755e+06	528713			3577348	528774	2004-03-18	Molino basin ridge to E	JES-04-509	44	19	ml, Mineral lineation, plunging			Molino-Soldier
JES-04-510	JES-04-510	32.3354	-110.694	3.57766e+06	528838			3577458	528899	2004-03-18	Molino basin ridge to E	JES-04-510	53	18	ml, Mineral lineation, plunging			Molino-Soldier
JES-04-511	JES-04-511	32.3363	-110.692	3.57775e+06	528949			3577556	529010	2004-03-18	Molino basin ridge to E	JES-04-511	47	20	ml, Mineral lineation, plunging			Molino-Soldier
JES-04-752	JES-04-752	32.34	-110.686	3.57816e+06	529523			3577964	529584	2004-04-19	Molino basin near E	JES-04-752	38	15	ml, Mineral lineation, plunging			Molino-Soldier
JES-04-753	JES-04-753	32.3404	-110.685	3.57821e+06	529621			3578012	529682	2004-04-19	Molino basin near E	JES-04-753	40	20	sld, stretching lineation, directed down-plunge		NE	Molino-Soldier
JES-04-754	JES-04-754	32.3403	-110.684	3.5782e+06	529706			3577999	529767	2004-04-19	Molino basin near E	JES-04-754	39	19	sld, stretching lineation, directed down-plunge		NE	Molino-Soldier
JES-04-755	JES-04-755	32.3411	-110.684	3.57829e+06	529760			3578091	529821	2004-04-19	Molino basin near E	JES-04-755	42	17	lt, Lineation, generic tectonic			Molino-Soldier
JES-04-756	JES-04-756	32.3423	-110.684	3.57842e+06	529769			3578221	529830	2004-04-19	Molino basin near E	JES-04-756	41	26	ml, Mineral lineation, plunging			Molino-Soldier
JES-04-757	JES-04-757	32.3434	-110.684	3.57855e+06	529714			3578350	529775	2004-04-19	Molino basin near E	JES-04-757	35	12	sld, stretching lineation, directed down-plunge		NE	Molino-Soldier
JES-04-758	JES-04-758	32.3445	-110.683	3.57866e+06	529841			3578465	529902	2004-04-19	Molino basin near E	JES-04-758	41	11	ml, Mineral lineation, plunging			Molino-Soldier
JES-04-759	JES-04-759	32.3447	-110.682	3.57868e+06	529916			3578486	529977	2004-04-19	Molino basin near E	JES-04-759	40	8	ml, Mineral lineation, plunging			Molino-Soldier
JES-04-760	JES-04-760	32.3449	-110.681	3.57871e+06	529979			3578513	530040	2004-04-19	Molino basin near E	JES-04-760	25	16	ml, Mineral lineation, plunging			Molino-Soldier
JES-04-761	JES-04-761	32.3458	-110.68	3.57881e+06	530080			3578614	530141	2004-04-19	Molino basin near E	JES-04-761	30	11	lt, Lineation, generic tectonic			Molino-Soldier
JES-04-762	JES-04-762	32.3457	-110.68	3.5788e+06	530106			3578598	530167	2004-04-19	Molino basin near E	JES-04-762	34	10	lt, Lineation, generic tectonic			Molino-Soldier
JES-04-763	JES-04-763	32.3464	-110.68	3.57887e+06	530148			3578677	530209	2004-04-19	Molino basin near E	JES-04-763	37	9	sld, stretching lineation, directed down-plunge		NE	Molino-Soldier
JES-04-764	JES-04-764	32.3479	-110.678	3.57905e+06	530277			3578848	530338	2004-04-19	Molino basin near E	JES-04-764	32	10	lt, Lineation, generic tectonic			Molino-Soldier
JES-04-845	JES-04-845	32.3329	-110.695	3.57737e+06	528725			3577175	528786	2004-04-28	Molino Canyon - middle	JES-04-845	45	20	ml, Mineral lineation, plunging			Molino-Soldier
JES-04-846	JES-04-846	32.3332	-110.695	3.57741e+06	528712			3577212	528773	2004-04-28	Molino Canyon - middle	JES-04-846	47	23	ml, Mineral lineation, plunging			Molino-Soldier
JES-04-848	JES-04-848	32.3367	-110.691	3.5778e+06	529039			3577600	529100	2004-04-28	Molino Canyon - middle	JES-04-848	41	15	lt, Lineation, generic tectonic			Molino-Soldier
JES-05-001	JES-05-001	32.3352	-110.721	3.57763e+06	526287		12N	3577429	526348	2004-10-20	Prison Camp E	JES-05-001	45	27	lineation mylonitic stretch shape directed Description		NE		4037
JES-05-002	JES-05-002	32.3348	-110.721	3.57758e+06	526299		12N	3577380	526360	2004-10-20	Prison Camp E	JES-05-002	54	10	lineation stretch shape mylonitic Description				2149
JES-05-003	JES-05-003	32.3347	-110.72	3.57757e+06	526307		12N	3577377	526368	2004-10-20	Prison Camp E	JES-05-003	48	18	lineation stretch shape mylonitic Description				2161
JES-05-004	JES-05-004	32.3348	-110.72	3.57758e+06	526323		12N	3577386	526384	2004-10-20	Prison Camp E	JES-05-004	53	8	lineation stretch shape mylonitic Description				2161
JES-05-005	JES-05-005	32.3344	-110.72	3.57754e+06	526352		12N	3577341	526413	2004-10-20	Prison Camp E	JES-05-005	54	11	lineation mylonitic stretch shape directed Description		NE		4037
JES-05-006	JES-05-006	32.3344	-110.72	3.57754e+06	526358		12N	3577339	526419	2004-10-20	Prison Camp E	JES-05-006	51	13	lineation stretch shape mylonitic Description				2161
JES-05-008	JES-05-008	32.334	-110.718	3.5775e+06	526521		12N	3577298	526582	2004-10-20	Prison Camp E	JES-05-008	49	10	lineation stretch shape mylonitic Description				2161
JES-05-009	JES-05-009	32.3341	-110.718	3.57751e+06	526578		12N	3577310	526639	2004-10-20	Prison Camp E	JES-05-009	51	4	lineation stretch shape mylonitic Description				2161
JES-05-011	JES-05-011	32.334	-110.716	3.57749e+06	526710		12N	3577296	526771	2004-10-20	Prison Camp E	JES-05-011	52	8	lineation stretch shape mylonitic Description				2161
JES-05-012	JES-05-012	32.3348	-110.716	3.57758e+06	526752		12N	3577380	526813	2004-10-20	Prison Camp E	JES-05-012	48	15	lineation stretch shape mylonitic Description				2161
JES-05-013	JES-05-013	32.3352	-110.716	3.57763e+06	526753		12N	3577435	526814	2004-10-20	Prison Camp E	JES-05-013	52	24	lineation stretch shape mylonitic Description				2161
JES-05-014	JES-05-014	32.3356	-110.716	3.57767e+06	526765		12N	3577476	526826	2004-10-20	Prison Camp E	JES-05-014	52	21	lineation stretch shape mylonitic Description				2161
JES-05-015	JES-05-015	32.3378	-110.711	3.57792e+06	527168		12N	3577722	527229	2004-10-20	Prison Camp E	JES-05-015	43	7	lineation stretch shape mylonitic Description				2161
JES-05-016	JES-05-016	32.338	-110.714	3.57794e+06	526955		12N	3577742	527016	2004-10-20	Prison Camp E	JES-05-016	41	10	lineation stretch shape mylonitic Description				2161
JES-05-017	JES-05-017	32.338	-110.715	3.57794e+06	526818		12N	3577744	526879	2004-10-20	Prison Camp E	JES-05-017	42	6	lineation stretch shape mylonitic Description				2161
JES-05-018	JES-05-018	32.3382	-110.716	3.57796e+06	526745		12N	3577763	526806	2004-10-20	Prison Camp E	JES-05-018	42	12	lineation stretch shape mylonitic Description				2149
JES-05-019	JES-05-019	32.3345	-110.723	3.57755e+06	526042		12N	3577350	526103	2004-10-22	Prison Camp S 22 Oct	JES-05-019	53	14	lineation stretch shape mylonitic Description				2149
JES-05-020	JES-05-020	32.3338	-110.724	3.57747e+06	525986		12N	3577276	526047	2004-10-22	Prison Camp S 22 Oct	JES-05-020	58	11	lineation mylonitic stretch shape directed Description		NE		4037
JES-05-023	JES-05-023	32.333	-110.724	3.57738e+06	525993		12N	3577183	526054	2004-10-22	Prison Camp S 22 Oct	JES-05-023	59	9	lineation stretch shape mylonitic Description		NE		2161
JES-05-024	JES-05-024	32.333	-110.723	3.57739e+06	526043		12N	3577188	526104	2004-10-22	Prison Camp S 22 Oct	JES-05-024	56	10	lineation stretch shape mylonitic Description				2161
JES-05-025	JES-05-025	32.3328	-110.722	3.57736e+06	526140		12N	3577167	526201	2004-10-22	Prison Camp S 22 Oct	JES-05-025	55	7	lineation stretch shape mylonitic Description				2149
JES-05-026	JES-05-026	32.3337	-110.722	3.57746e+06	526174		12N	3577261	526235	2004-10-22	Prison Camp S 22 Oct	JES-05-026	57	8	lineation stretch shape mylonitic Description				2161
JES-05-027	JES-05-027	32.3338	-110.721	3.57747e+06	526274		12N	3577276	526335	2004-10-22	Prison Camp S 22 Oct	JES-05-027	51	10	lineation stretch shape mylonitic Description				2161
JES-05-028	JES-05-028	32.333	-110.72	3.57739e+06	526368		12N	3577188	526429	2004-10-22	Prison Camp S 22 Oct	JES-05-028	55	9	lineation stretch shape mylonitic Description		SW		2161
JES-05-030	JES-05-030	32.3321	-110.719	3.57728e+06	526444		12N	3577086	526505	2004-10-22	Prison Camp S 22 Oct	JES-05-030	55	5	lineation stretch shape mylonitic Description				2161
JES-05-031	JES-05-031	32.3324	-110.718	3.57732e+06	526497		12N	3577121	526558	2004-10-22	Prison Camp S 22 Oct	JES-05-031	65	6	lineation stretch shape mylonitic Description		NE		4035
JES-05-032	JES-05-032	32.3322	-110.718	3.57729e+06	526502		12N	3577093	526563	2004-10-22	Prison Camp S 22 Oct	JES-05-032	51	5	lineation mylonitic stretch shape directed Description		NE		4037
JES-05-042	JES-05-042	32.3326	-110.723	3.57734e+06	526080		12N	3577139	526141	2004-10-22	Prison Camp S 22 Oct	JES-05-042	57	10	lineation stretch shape mylonitic Description				2161
JES-05-043	JES-05-043	32.3349	-110.723	3.57759e+06	526084		12N	3577392	526145	2004-10-22	Prison Camp S 22 Oct	JES-05-043	55	12	lineation stretch shape mylonitic Description				2161
JES-05-044	JES-05-044	32.3361	-110.72	3.57772e+06	526397		12N	3577526	526458	2004-11-05	Prison Camp SE (5 Nov)	JES-05-044	54	5	lineation stretch shape mylonitic Description				2161
JES-05-045	JES-05-045	32.335	-110.718	3.57761e+06	526559		12N	3577408	526620	2004-11-05	Prison Camp SE (5 Nov)	JES-05-045	55	10	lineation stretch shape mylonitic Description				2161
JES-05-046	JES-05-046	32.3337	-110.718	3.57746e+06	526534		12N	3577259	526595	2004-11-05	Prison Camp SE (5 Nov)	JES-05-046	55	9	lineation stretch shape mylonitic Description				2161
JES-05-047	JES-05-047	32.3335	-110.718	3.57744e+06	526552		12N	3577240	526613	2004-11-05	Prison Camp SE (5 Nov)	JES-05-047	57	12	lineation stretch shape mylonitic Description				2161
JES-05-048	JES-05-048	32.3333	-110.718	3.57741e+06	526556		12N	3577215	526617	2004-11-05	Prison Camp SE (5 Nov)	JES-05-048	53	3	lineation stretch shape mylonitic Description				2161
JES-05-049	JES-05-049	32.3332	-110.717	3.5774e+06	526596		12N	3577205	526657	2004-11-05	Prison Camp SE (5 Nov)	JES-05-049	53	5	lineation stretch shape mylonitic Description				2161
JES-05-050	JES-05-050	32.3331	-110.717	3.5774e+06	526637		12N	3577201	526698	2004-11-05	Prison Camp SE (5 Nov)	JES-05-050	54	4	lineation stretch shape mylonitic Description				2161
JES-05-051	JES-05-051	32.3333	-110.716	3.57741e+06	526689		12N	3577217	526750	2004-11-05	Prison Camp SE (5 Nov)	JES-05-051	50	2	lineation stretch shape mylonitic Description				2161
JES-05-052	JES-05-052	32.3333	-110.716	3.57741e+06	526750		12N	3577217	526811	2004-11-05	Prison Camp SE (5 Nov)	JES-05-052	53	3	lineation stretch shape mylonitic Description				2161
JES-05-053	JES-05-053	32.3332	-110.715	3.5774e+06	526840		12N	3577205	526901	2004-11-05	Prison Camp SE (5 Nov)	JES-05-053	52	3	lineation stretch shape mylonitic Description				2161
JES-05-054	JES-05-054	32.3331	-110.714	3.57739e+06	526945		12N	3577197	527006	2004-11-05	Prison Camp SE (5 Nov)	JES-05-054	52	1	lineation stretch shape mylonitic Description				2161
JES-05-055	JES-05-055	32.3325	-110.713	3.57733e+06	526988		12N	3577135	527049	2004-11-05	Prison Camp SE (5 Nov)	JES-05-055	53	3	lineation stretch shape mylonitic Description				2161
JES-05-056	JES-05-056	32.3321	-110.713	3.57729e+06	526994		12N	3577088	527055	2004-11-05	Prison Camp SE (5 Nov)	JES-05-056	57	6	lineation mylonitic stretch shape directed Description		NE		4035
JES-05-078	JES-05-078	32.3325	-110.723	3.57733e+06	526099		12N	3577130	526160	2004-11-05	Prison Camp SE (5 Nov)	JES-05-078	59	12	lineation stretch shape mylonitic Description				2161
JES-05-079	JES-05-079	32.3349	-110.723	3.57759e+06	526084		12N	3577392	526145	2004-11-05	Prison Camp SE (5 Nov)	JES-05-079	55	12	lineation stretch shape mylonitic Description				2161
JES-05-111	JES-05-111	32.3322	-110.723	3.57729e+06	526024		12N	3577090	526085	2004-11-24	Middle Soldier Canyon	JES-05-111	59	9	lineation mylonitic stretch shape directed Description		NE		4037
JES-05-113	JES-05-113	32.3324	-110.725	3.57732e+06	525878		12N	3577122	525939	2004-12-13	Middle Soldier Canyon	JES-05-113	50	9	lineation stretch shape mylonitic Description		NE		2149
JES-05-114	JES-05-114	32.3318	-110.725	3.57724e+06	525875		12N	3577046	525936	2004-12-13	Middle Soldier Canyon	JES-05-114	59	11	lineation stretch shape mylonitic Description				2161
JES-05-121	JES-05-121	32.3316	-110.728	3.57722e+06	525580		12N	3577022	525641	2004-12-13	Middle Soldier Canyon	JES-05-121	65	14	lineation mylonitic stretch shape directed Description		NE		4037
JES-05-133	JES-05-133	32.3353	-110.724	3.57764e+06	525937		12N	3577441	525998	2004-12-20	Gibbon Mtn E	JES-05-133	49	14	lineation mylonitic stretch shape directed Description		NE		4037
JES-05-134	JES-05-134	32.3351	-110.725	3.57761e+06	525834		12N	3577413	525895	2004-12-20	Gibbon Mtn E	JES-05-134	52	11	lineation mylonitic stretch shape directed Description		NE		4035
JES-05-136	JES-05-136	32.3344	-110.727	3.57754e+06	525662		12N	3577338	525723	2004-12-20	Gibbon Mtn E	JES-05-136	54	12	lineation stretch shape mylonitic Description				2161
JES-05-137	JES-05-137	32.335	-110.728	3.5776e+06	525636		12N	3577406	525697	2004-12-20	Gibbon Mtn E	JES-05-137	55	14	lineation mylonitic stretch shape directed Description		NE		4035
JES-05-138	JES-05-138	32.335	-110.729	3.5776e+06	525544		12N	3577407	525605	2004-12-20	Gibbon Mtn E	JES-05-138	63	12	lineation mylonitic stretch shape directed Description		NE		4035
JES-05-139	JES-05-139	32.3355	-110.73	3.57765e+06	525429		12N	3577454	525490	2004-12-20	Gibbon Mtn E	JES-05-139	50	10	lineation stretch shape mylonitic Description				2161
JES-05-142	JES-05-142	32.3358	-110.733	3.57768e+06	525164		12N	3577487	525225	2004-12-20	Gibbon Mtn E	JES-05-142	59	14	lineation stretch shape mylonitic Description				2161
JES-05-143	JES-05-143	32.3354	-110.733	3.57764e+06	525097		12N	3577442	525158	2004-12-20	Gibbon Mtn E	JES-05-143	59	5	lineation stretch shape mylonitic Description		NE		4037
JES-05-144	JES-05-144	32.3348	-110.734	3.57758e+06	525036		12N	3577380	525097	2004-12-20	Gibbon Mtn E	JES-05-144	60	7	lineation stretch shape mylonitic Description				2161
JES-05-145	JES-05-145	32.3346	-110.734	3.57756e+06	525022		12N	3577358	525083	2004-12-20	Gibbon Mtn E	JES-05-145	51	5	lineation mylonitic stretch shape directed Description		NE		4035
JES-05-146	JES-05-146	32.3344	-110.734	3.57753e+06	525002		12N	3577333	525063	2004-12-20	Gibbon Mtn E	JES-05-146	60	5	lineation stretch shape mylonitic Description				2161
JES-05-147	JES-05-147	32.3326	-110.736	3.57733e+06	524841		12N	3577133	524902	2004-12-20	Gibbon Mtn E	JES-05-147	245	1	lineation stretch shape mylonitic Description				2161
JES-05-148	JES-05-148	32.3317	-110.737	3.57723e+06	524759		12N	3577035	524820	2004-12-20	Gibbon Mtn E	JES-05-148	65	2	lineation stretch shape mylonitic Description				2161
JES-05-151	JES-05-151	32.3335	-110.736	3.57743e+06	524812		12N	3577233	524873	2004-12-20	Gibbon Mtn E	JES-05-151	58	1	lineation stretch shape mylonitic Description				2161
JES-05-154	JES-05-154	32.3356	-110.737	3.57767e+06	524717		12N	3577471	524778	2004-12-20	Gibbon Mtn E	JES-05-154	54	10	lineation stretch shape mylonitic Description				2161
JES-05-155	JES-05-155	32.3372	-110.738	3.57785e+06	524663		12N	3577648	524724	2004-12-20	Gibbon Mtn E	JES-05-155	50	4	lineation stretch shape mylonitic Description				2161
JES-05-156	JES-05-156	32.3377	-110.739	3.5779e+06	524590		12N	3577698	524651	2004-12-20	Gibbon Mtn E	JES-05-156	49	9	lineation stretch shape mylonitic Description				2161
JES-05-157	JES-05-157	32.3388	-110.74	3.57802e+06	524507		12N	3577827	524568	2004-12-20	Gibbon Mtn E	JES-05-157	51	1	lineation stretch shape mylonitic Description				2161
JES-05-158	JES-05-158	32.3395	-110.741	3.57809e+06	524417		12N	3577897	524478	2004-12-20	Gibbon Mtn E	JES-05-158	231	1	lineation stretch shape mylonitic Description				2161
JES-05-159	JES-05-159	32.3389	-110.744	3.57803e+06	524082		12N	3577829	524143	2004-12-20	Gibbon Mtn E	JES-05-159	51	8	lineation stretch shape mylonitic Description				2161
JES-05-160	JES-05-160	32.339	-110.744	3.57804e+06	524095		12N	3577839	524156	2004-12-20	Gibbon Mtn E	JES-05-160	55	4	lineation stretch shape mylonitic Description				2149
JES-05-161	JES-05-161	32.3394	-110.743	3.57809e+06	524206		12N	3577894	524267	2004-12-20	Gibbon Mtn E	JES-05-161	52	9	lineation stretch shape mylonitic Description				2161
JES-05-163	JES-05-163	32.3375	-110.727	3.57788e+06	525690		12N	3577683	525751	2004-12-20	Gibbon Mtn E	JES-05-163	48	10	lineation stretch shape mylonitic Description				2161
JES-05-165	JES-05-165	32.3377	-110.732	3.57791e+06	525211		12N	3577708	525272	2004-12-27	Gibbon Mtn SE	JES-05-165	50	9	lineation stretch shape mylonitic Description				2149
JES-05-166	JES-05-166	32.3337	-110.74	3.57745e+06	524463		12N	3577256	524524	2004-12-27	Gibbon Mtn SE	JES-05-166	56	6	lineation stretch shape mylonitic Description				2149
JES-05-167	JES-05-167	32.3332	-110.743	3.5774e+06	524192		12N	3577200	524253	2004-12-27	Gibbon Mtn SE	JES-05-167	60	3	lineation stretch shape mylonitic Description				2149
JES-05-168	JES-05-168	32.3318	-110.745	3.57724e+06	524042		12N	3577041	524103	2004-12-27	Gibbon Mtn SE	JES-05-168	60	0	lineation mylonitic stretch shape directed Description		NE		4037
JES-05-178	JES-05-178	32.3325	-110.744	3.57733e+06	524098		12N	3577128	524159	2004-12-27	Gibbon Mtn SE	JES-05-178	59	2	lineation stretch shape mylonitic Description				2149
JES-05-180	JES-05-180	32.3349	-110.743	3.57759e+06	524170		12N	3577389	524231	2004-12-27	Gibbon Mtn SE	JES-05-180	53	5	lineation stretch shape mylonitic Description				2149
JES-05-181	JES-05-181	32.332	-110.741	3.57727e+06	524385		12N	3577068	524446	2004-12-27	Gibbon Mtn SE	JES-05-181	61	1	lineation stretch shape mylonitic Description				2161
JES-05-207	JES-05-207	32.3343	-110.746	3.57752e+06	523895		12N	3577325	523956	2005-01-20	Gibbon Mtn SW	JES-05-207	56	5	lineation stretch shape mylonitic Description				2161
JES-05-209	JES-05-209	32.334	-110.749	3.57749e+06	523663		12N	3577291	523724	2005-01-20	Gibbon Mtn SW	JES-05-209	60	6	lineation stretch shape mylonitic Description				2161
JES-05-212	JES-05-212	32.3332	-110.752	3.5774e+06	523378		12N	3577198	523439	2005-01-20	Gibbon Mtn SW	JES-05-212	55	7	lineation stretch shape mylonitic Description				2149
JES-05-213	JES-05-213	32.3323	-110.753	3.5773e+06	523282		12N	3577099	523343	2005-01-20	Gibbon Mtn SW	JES-05-213	61	0	lineation stretch shape mylonitic Description				2161
JES-05-215	JES-05-215	32.3317	-110.753	3.57723e+06	523231		12N	3577037	523292	2005-01-20	Gibbon Mtn SW	JES-05-215	240	2	lineation stretch shape mylonitic Description				2161
JES-05-226	JES-05-226	32.3315	-110.751	3.57721e+06	523437		12N	3577008	523498	2005-01-20	Gibbon Mtn SW	JES-05-226	243	4	lineation stretch shape mylonitic Description				2161
JES-05-228	JES-05-228	32.3323	-110.749	3.5773e+06	523596		12N	3577103	523657	2005-01-20	Gibbon Mtn SW	JES-05-228	59	4	lineation stretch shape mylonitic Description				2149
JES-05-230	JES-05-230	32.3328	-110.746	3.57735e+06	523890		12N	3577151	523951	2005-01-20	Gibbon Mtn SW	JES-05-230	61	2	lineation stretch shape mylonitic Description				2161
JES-05-231	JES-05-231	32.3331	-110.745	3.57739e+06	523978		12N	3577190	524039	2005-01-20	Gibbon Mtn SW	JES-05-231	63	5	lineation stretch shape mylonitic Description				2149
JES-05-232	JES-05-232	32.3334	-110.744	3.57742e+06	524088		12N	3577226	524149	2005-01-20	Gibbon Mtn SW	JES-05-232	59	10	lineation stretch shape mylonitic Description				2161
JES-05-581		32.3444	-110.78	3.57863e+06	520730		12N	3578431	520791	2005-03-18	Sabino Cyn, upper	JES-05-581	46	7	mylonitic lineation		NE
JES-05-582		32.3491	-110.78	3.57915e+06	520722		12N	3578951	520783	2005-03-18	Sabino Cyn, upper	JES-05-582	233	0	mylonitic lineation
JES-05-583		32.3511	-110.779	3.57937e+06	520827		12N	3579177	520888	2005-03-18	Sabino Cyn, upper	JES-05-583	63	2	mylonitic lineation
JES-05-584		32.3553	-110.775	3.57984e+06	521124		12N	3579640	521185	2005-03-18	Sabino Cyn, upper	JES-05-584	51	12	mylonitic lineation
JES-06-467		32.3312	-110.675	3.57719e+06	530619	NAD83	12N			2006-04-15	E Molino Basin (W Spr Cyn)	JES-06-467	40	14	mylonitic lineation, down-dip arrow	trend and plunge	NE	Molino-Soldier
JES-06-468		32.3315	-110.674	3.57723e+06	530685	NAD83	12N			2006-04-15	E Molino Basin (W Spr Cyn)	JES-06-468	49	20	mylonitic lineation	trend and plunge		Molino-Soldier
JES-06-469		32.3317	-110.673	3.57725e+06	530758	NAD83	12N			2006-04-15	E Molino Basin (W Spr Cyn)	JES-06-469	48	12	mylonitic lineation, down-dip arrow	trend and plunge	NE	Molino-Soldier
JES-06-470		32.332	-110.672	3.57728e+06	530829	NAD83	12N			2006-04-15	E Molino Basin (W Spr Cyn)	JES-06-470	39	14	mylonitic lineation, down-dip arrow	trend and plunge	NE	Molino-Soldier
JES-06-471		32.3325	-110.672	3.57733e+06	530861	NAD83	12N			2006-04-15	E Molino Basin (W Spr Cyn)	JES-06-471	39	19	mylonitic lineation	trend and plunge		Molino-Soldier
JES-06-472		32.3334	-110.671	3.57744e+06	530953	NAD83	12N			2006-04-15	E Molino Basin (W Spr Cyn)	JES-06-472	38	16	mylonitic lineation	trend and plunge		Molino-Soldier
JES-06-473		32.3347	-110.67	3.57758e+06	531022	NAD83	12N			2006-04-15	E Molino Basin (W Spr Cyn)	JES-06-473	41	19	mylonitic lineation, down-dip arrow	trend and plunge	NE	Molino-Soldier
JES-06-474		32.3356	-110.669	3.57768e+06	531106	NAD83	12N			2006-04-15	E Molino Basin (W Spr Cyn)	JES-06-474	36	12	mylonitic lineation, down-dip arrow	trend and plunge	NE	Molino-Soldier
JES-06-475		32.3367	-110.669	3.57781e+06	531128	NAD83	12N			2006-04-15	E Molino Basin (W Spr Cyn)	JES-06-475	38	23	mylonitic lineation	trend and plunge		Molino-Soldier
JES-06-476		32.3386	-110.667	3.57802e+06	531296	NAD83	12N			2006-04-15	E Molino Basin (W Spr Cyn)	JES-06-476	33	12	mylonitic lineation	trend and plunge		Molino-Soldier
JES-06-477		32.339	-110.667	3.57806e+06	531323	NAD83	12N			2006-04-15	E Molino Basin (W Spr Cyn)	JES-06-477	31	19	mylonitic lineation	trend and plunge		Molino-Soldier
JES-06-478		32.3394	-110.667	3.57811e+06	531349	NAD83	12N			2006-04-15	E Molino Basin (W Spr Cyn)	JES-06-478	27	14	mylonitic lineation	trend and plunge		Molino-Soldier
JES-06-479		32.3399	-110.667	3.57816e+06	531368	NAD83	12N			2006-04-15	E Molino Basin (W Spr Cyn)	JES-06-479	34	18	mylonitic lineation	trend and plunge		Molino-Soldier
JES-06-480		32.3402	-110.666	3.5782e+06	531474	NAD83	12N			2006-04-24	E Molino Basin (W Spr Cyn)	JES-06-480	38	16	mylonitic lineation	trend and plunge		Molino-Soldier
JES-06-481		32.3404	-110.665	3.57822e+06	531527	NAD83	12N			2006-04-24	E Molino Basin (W Spr Cyn)	JES-06-481	27	9	mylonitic lineation	trend and plunge		Molino-Soldier
JES-06-482		32.3407	-110.665	3.57825e+06	531567	NAD83	12N			2006-04-24	E Molino Basin (W Spr Cyn)	JES-06-482	31	10	mylonitic lineation	trend and plunge		Molino-Soldier
JES-06-483		32.3415	-110.664	3.57834e+06	531637	NAD83	12N			2006-04-24	E Molino Basin (W Spr Cyn)	JES-06-483	31	4	mylonitic lineation	trend and plunge		Molino-Soldier
JES-06-484		32.3422	-110.663	3.57842e+06	531746	NAD83	12N			2006-04-24	E Molino Basin (W Spr Cyn)	JES-06-484	27	4	mylonitic lineation	trend and plunge		Molino-Soldier
JES-06-485		32.3427	-110.662	3.57847e+06	531774	NAD83	12N			2006-04-24	E Molino Basin (W Spr Cyn)	JES-06-485	29	3	mylonitic lineation	trend and plunge		Molino-Soldier
JES-06-486		32.3432	-110.662	3.57853e+06	531825	NAD83	12N			2006-04-24	E Molino Basin (W Spr Cyn)	JES-06-486	26	13	mylonitic lineation	trend and plunge		Molino-Soldier
JES-06-487		32.3437	-110.661	3.57858e+06	531894	NAD83	12N			2006-04-24	E Molino Basin (W Spr Cyn)	JES-06-487	29	8	mylonitic lineation	trend and plunge		Molino-Soldier
JES-06-488		32.3429	-110.658	3.57849e+06	532159	NAD83	12N			2006-04-24	E Molino Basin (W Spr Cyn)	JES-06-488	211	2	mylonitic lineation	trend and plunge		Molino-Soldier
JES-06-489		32.3426	-110.658	3.57846e+06	532182	NAD83	12N			2006-04-24	E Molino Basin (W Spr Cyn)	JES-06-489	212	5	mylonitic lineation	trend and plunge		Molino-Soldier
JES-06-490		32.3424	-110.658	3.57844e+06	532181	NAD83	12N			2006-04-24	E Molino Basin (W Spr Cyn)	JES-06-490	208	5	mylonitic lineation	trend and plunge		Molino-Soldier
JES-06-491		32.342	-110.657	3.57839e+06	532287	NAD83	12N			2006-04-24	E Molino Basin (W Spr Cyn)	JES-06-491	27	12	mylonitic lineation	trend and plunge		Molino-Soldier
JES-06-492		32.3417	-110.656	3.57836e+06	532348	NAD83	12N			2006-04-24	E Molino Basin (W Spr Cyn)	JES-06-492	28	7	mylonitic lineation	trend and plunge		Molino-Soldier
JES-06-493		32.3429	-110.655	3.5785e+06	532447	NAD83	12N			2006-04-24	E Molino Basin (W Spr Cyn)	JES-06-493	29	7	mylonitic lineation	trend and plunge		Molino-Soldier
JES-06-494		32.3442	-110.654	3.57864e+06	532538	NAD83	12N			2006-04-24	E Molino Basin (W Spr Cyn)	JES-06-494	33	9	mylonitic lineation	trend and plunge		Molino-Soldier
JES-06-495		32.3445	-110.654	3.57868e+06	532514	NAD83	12N			2006-04-24	E Molino Basin (W Spr Cyn)	JES-06-495	26	14	mylonitic lineation	trend and plunge		Molino-Soldier
JES-06-496		32.3454	-110.653	3.57877e+06	532642	NAD83	12N			2006-04-24	E Molino Basin (W Spr Cyn)	JES-06-496	31	12	mylonitic lineation	trend and plunge		Molino-Soldier
JES-06-497		32.3463	-110.656	3.57888e+06	532372	NAD83	12N			2006-04-24	E Molino Basin (W Spr Cyn)	JES-06-497	30	4	mylonitic lineation	trend and plunge		Molino-Soldier
JES-19-031		32.3363	-110.634	3.57757e+06	534510	NAD83	12S			2018-12-10	Bellota W	JES-19-031	40	7	mylo lineation		SW	Bellota W	1204
JES-19-032		32.3369	-110.635	3.57764e+06	534455	NAD83	12S			2018-12-10	Bellota W	JES-19-032	35	9	mylo lineation			Bellota W	1221
JES-19-033		32.3377	-110.639	3.57772e+06	533989	NAD83	12S			2018-12-10	Bellota W	JES-19-033	28	9	mylo lineation			Bellota W	1229
JES-19-034		32.3387	-110.64	3.57784e+06	533904	NAD83	12S			2018-12-10	Bellota W	JES-19-034	27	2	mylo lineation			Bellota W	1269
JES-19-036		32.3385	-110.644	3.57781e+06	533585	NAD83	12S			2018-12-10	Bellota W	JES-19-036	31	5	mylo lineation			Bellota W	1265
JES-19-037		32.3411	-110.647	3.5781e+06	533315	NAD83	12S			2018-12-10	Bellota W	JES-19-037	201	6	mylo lineation			Bellota W	1308
JES-19-038		32.3422	-110.649	3.57823e+06	533087	NAD83	12S			2018-12-10	Bellota W	JES-19-038	27	5	mylo lineation			Bellota W	1344
JES-19-040		32.3436	-110.648	3.57838e+06	533166	NAD83	12S			2018-12-10	Bellota W	JES-19-040	31	17	mylo lineation			Bellota W	1321
JES-19-043		32.3454	-110.648	3.57858e+06	533139	NAD83	12S			2018-12-10	Bellota W	JES-19-043	201	19	mylo lineation			Bellota W	1270
JES-19-044		32.3435	-110.643	3.57837e+06	533700	NAD83	12S			2018-12-10	Bellota W	JES-19-044	5	5	mylo lineation			Bellota W	1240
JES-19-045		32.34	-110.639	3.57798e+06	533997	NAD83	12S			2018-12-10	Bellota W	JES-19-045	19	10	mylo lineation			Bellota W	1227
JES-19-046		32.3387	-110.634	3.57784e+06	534461	NAD83	12S			2018-12-10	Bellota W	JES-19-046	15	15	mylo lineation			Bellota W	1226
JES-19-047		32.3364	-110.635	3.57759e+06	534446	NAD83	12S			2019-01-17	Bellota W	JES-19-047	34	18	mylo lineation			Bellota W	1216
JES-19-048		32.3361	-110.636	3.57755e+06	534310	NAD83	12S			2019-01-17	Bellota W	JES-19-048	32	2	mylo lineation		SW	Bellota W	1217
JES-19-050		32.3371	-110.633	3.57767e+06	534596	NAD83	12S			2019-01-17	Bellota W	JES-19-050	35	1	mylo lineation		SW	Bellota W	1211
JES-19-051		32.3346	-110.631	3.57739e+06	534764	NAD83	12S			2019-01-17	Bellota W	JES-19-051	208	1	mylo lineation			Bellota W	1218
JES-19-052		32.3346	-110.632	3.57739e+06	534648	NAD83	12S			2019-01-17	Bellota W	JES-19-052	203	1	mylo lineation			Bellota W	1223
JES-19-053		32.3348	-110.606	3.57742e+06	537106	NAD83	12S			2019-01-27	Bellota E	JES-19-053	212	4	mylo lineation			Bellota E	1192
JES-19-054		32.3362	-110.606	3.57757e+06	537137	NAD83	12S			2019-01-27	Bellota E	JES-19-054	207	4	mylo lineation		SW	Bellota E	1189
JES-19-055		32.3371	-110.605	3.57767e+06	537247	NAD83	12S			2019-01-27	Bellota E	JES-19-055	207	12	mylo lineation		SW	Bellota E	1184
JES-19-056		32.3377	-110.604	3.57774e+06	537348	NAD83	12S			2019-01-27	Bellota E	JES-19-056	3	2	mylo lineation			Bellota E	1182
JES-19-057		32.338	-110.604	3.57778e+06	537372	NAD83	12S			2019-01-27	Bellota E	JES-19-057	10	11	mylo lineation			Bellota E	1178
JES-19-058		32.3385	-110.603	3.57783e+06	537388	NAD83	12S			2019-01-27	Bellota E	JES-19-058	13	12	mylo lineation			Bellota E	1180
JES-19-059		32.3402	-110.603	3.57802e+06	537458	NAD83	12S			2019-01-27	Bellota E	JES-19-059	11	6	mylo lineation			Bellota E	1171
JES-19-059.5		32.3416	-110.601	3578175	537612	NAD83	12S			2019-01-27	Bellota E	JES-19-059.5	181	3	mylo lineation		NE	Bellota E
JES-19-060		32.3429	-110.599	3.57832e+06	537841	NAD83	12S			2019-01-27	Bellota E	JES-19-060	5	11	mylo lineation			Bellota E	1160
JES-19-062		32.3424	-110.601	3.57826e+06	537579	NAD83	12S			2019-01-27	Bellota E	JES-19-062	8	10	mylo lineation			Bellota E	1171
JES-19-063		32.3424	-110.604	3.57827e+06	537327	NAD83	12S			2019-01-27	Bellota E	JES-19-063	190	2	mylo lineation			Bellota E	1183
JES-19-064		32.3415	-110.605	3.57816e+06	537201	NAD83	12S			2019-01-27	Bellota E	JES-19-064	25	5	mylo lineation			Bellota E	1230
JES-19-065		32.341	-110.607	3.57811e+06	537033	NAD83	12S			2019-01-27	Bellota E	JES-19-065	199	11	mylo lineation			Bellota E	1236
JES-19-066		32.3382	-110.611	3.57779e+06	536629	NAD83	12S			2019-01-27	Bellota E	JES-19-066	196	11	mylo lineation			Bellota E	1248
JES-19-067		32.3367	-110.612	3.57763e+06	536602	NAD83	12S			2019-01-27	Bellota E	JES-19-067	29	6	mylo lineation			Bellota E	1228
JES-19-075		32.3367	-110.587	3.57763e+06	538888	NAD83	12S			2019-02-28	Bellota E	JES-19-075	12	14	mylo lineation		NE	Bellota E	1185
JES-19-079		32.3447	-110.586	3.57852e+06	538984	NAD83	12S			2019-02-28	Bellota E	JES-19-079	193	11	mylo lineation			Bellota E	1187
JES-19-080		32.3437	-110.587	3.57841e+06	538899	NAD83	12S			2019-02-28	Bellota E	JES-19-080	9	17	mylo lineation			Bellota E	1215
JES-19-081		32.3423	-110.59	3.57826e+06	538673	NAD83	12S			2019-02-28	Bellota E	JES-19-081	11	5	mylo lineation			Bellota E	1223
JES-19-082		32.3407	-110.592	3.57807e+06	538471	NAD83	12S			2019-02-28	Bellota E	JES-19-082	200	4	mylo lineation			Bellota E	1253
JES-19-083		32.3403	-110.592	3.57804e+06	538446	NAD83	12S			2019-02-28	Bellota E	JES-19-083	200	5	mylo lineation		SW	Bellota E	1254
JES-98-101		32.3359	-110.724	3.57771e+06	525931	NAD83	12N			1998-08-28	Prison Camp west 98	JES-98-101	52	12.1244	mylonitic lineation	trend and plunge		Sabino - Bear
JES-98-102		32.3397	-110.729	3.57812e+06	525539	NAD83	12N			1998-08-28	Prison Camp west 98	JES-98-102	55	17.9315	mylonitic lineation	trend and plunge		Sabino - Bear
JES-98-103		32.3406	-110.732	3.57822e+06	525246	NAD83	12N			1998-08-28	Prison Camp west 98	JES-98-103	44	17.6693	mylonitic lineation	trend and plunge		Sabino - Bear
JES-98-104		32.3411	-110.732	3.57827e+06	525203	NAD83	12N			1998-08-28	Prison Camp west 98	JES-98-104	47	31.2972	mylonitic lineation	trend and plunge		Sabino - Bear
JES-98-105		32.3507	-110.743	3.57933e+06	524224	NAD83	12N			1998-08-28	Prison Camp west 98	JES-98-105	54	1	mylonitic lineation	trend and plunge		Sabino - Bear
JES-98-106		32.345	-110.741	3.57871e+06	524382	NAD83	12N			1998-08-28	Prison Camp west 98	JES-98-106	42	32	mylonitic lineation	trend and plunge		Sabino - Bear
JES-98-107		32.3434	-110.739	3.57853e+06	524602	NAD83	12N			1998-08-28	Prison Camp west 98	JES-98-107	40	44	mylonitic lineation	trend and plunge		Sabino - Bear
JES-98-108		32.3421	-110.735	3.57839e+06	524953	NAD83	12N			1998-08-28	Prison Camp west 98	JES-98-108	34	26	mylonitic lineation	trend and plunge		Sabino - Bear
JES-98-109		32.3416	-110.733	3.57833e+06	525132	NAD83	12N			1998-08-28	Prison Camp west 98	JES-98-109	30	20	mylonitic lineation	trend and plunge		Sabino - Bear
SMR-04-0628		32.3398	-110.729	3.57813e+06	525529	NAD83	12_NAD27	3.57793e+06	525590		Sycamore Reservoir area	SMR-04-0628	43	5	lin	lineation stretch shape mylonitic Description
SMR-04-0629		32.3406	-110.731	3.57822e+06	525298	NAD83	12_NAD27	3.57802e+06	525359		Sycamore Reservoir area	SMR-04-0629	40	10	lin	lineation stretch shape mylonitic Description
SMR-04-0630		32.3418	-110.733	3.57836e+06	525099	NAD83	12_NAD27	3.57816e+06	525160		Sycamore Reservoir area	SMR-04-0630	45	5	lin	lineation stretch shape mylonitic Description
SMR-04-0632		32.3418	-110.734	3.57835e+06	525013	NAD83	12_NAD27	3.57815e+06	525074		Sycamore Reservoir area	SMR-04-0632	48	11	lin	lineation mylonitic stretch shape directed Description	SW
SMR-04-0633		32.3422	-110.735	3.57839e+06	524930	NAD83	12_NAD27	3.5782e+06	524991		Sycamore Reservoir area	SMR-04-0633	26	18	lin	lineation stretch shape mylonitic Description
SMR-04-0634		32.3423	-110.736	3.57841e+06	524801	NAD83	12_NAD27	3.57822e+06	524862		Sycamore Reservoir area	SMR-04-0634	49	10	lin	lineation stretch shape mylonitic Description
SMR-04-0635		32.3441	-110.739	3.5786e+06	524578	NAD83	12_NAD27	3.5784e+06	524639		Sycamore Reservoir area	SMR-04-0635	32	23	lin	lineation stretch shape mylonitic Description
SMR-04-0637		32.3449	-110.741	3.5787e+06	524351	NAD83	12_NAD27	3.5785e+06	524412		Sycamore Reservoir area	SMR-04-0637	37	27	lin	lineation mylonitic stretch shape directed Description
SMR-04-0638		32.3474	-110.744	3.57897e+06	524118	NAD83	12_NAD27	3.57877e+06	524179		Sycamore Reservoir area	SMR-04-0638	38	27	lin	lineation stretch shape mylonitic Description
SMR-04-0640		32.349	-110.745	3.57915e+06	524000	NAD83	12_NAD27	3.57895e+06	524061		Sycamore Reservoir area	SMR-04-0640	38	5	lin	lineation stretch shape mylonitic Description
SMR-04-0641		32.3497	-110.745	3.57922e+06	523990	NAD83	12_NAD27	3.57903e+06	524051		Sycamore Reservoir area	SMR-04-0641	13	35	lin	lineation mylonitic stretch shape directed Description	NE
SMR-04-0642		32.3504	-110.746	3.5793e+06	523936	NAD83	12_NAD27	3.5791e+06	523997		Sycamore Reservoir area	SMR-04-0642	44	30	lin	lineation stretch shape mylonitic Description	NE
SMR-04-0643		32.349	-110.747	3.57914e+06	523842	NAD83	12_NAD27	3.57895e+06	523903		Sycamore Reservoir area	SMR-04-0643	43	16	lin	lineation stretch shape mylonitic Description
SMR-04-0644		32.3501	-110.748	3.57928e+06	523700	NAD83	12_NAD27	3.57908e+06	523761		Sycamore Reservoir area	SMR-04-0644	36	12	lin	lineation stretch shape mylonitic Description
SMR-04-0645		32.3493	-110.748	3.57918e+06	523683	NAD83	12_NAD27	3.57899e+06	523744		Sycamore Reservoir area	SMR-04-0645	47	8	lin	lineation mylonitic stretch shape directed Description	NE
SMR-04-0647		32.3492	-110.749	3.57918e+06	523607	NAD83	12_NAD27	3.57898e+06	523668		Sycamore Reservoir area	SMR-04-0647	45	22	lin	lineation stretch shape mylonitic Description
SMR-04-0652		32.3507	-110.754	3.57933e+06	523106	NAD83	12_NAD27	3.57914e+06	523167		Sycamore Reservoir area	SMR-04-0652	43	7	lin	lineation stretch shape mylonitic Description
SMR-04-0654		32.3489	-110.755	3.57913e+06	523045	NAD83	12_NAD27	3.57893e+06	523106		Sycamore Reservoir area	SMR-04-0654	53	5	lin	lineation stretch shape mylonitic Description
SMR-04-0657		32.3492	-110.756	3.57917e+06	522972	NAD83	12_NAD27	3.57897e+06	523033		Sycamore Reservoir area	SMR-04-0657	47	20	lin	lineation stretch shape mylonitic Description
SMR-04-0659		32.3507	-110.755	3.57933e+06	523037	NAD83	12_NAD27	3.57913e+06	523098		Sycamore Reservoir area	SMR-04-0659	51	12	lin	lineation mylonitic stretch shape directed Description	NE
SMR-04-0660		32.3508	-110.755	3.57935e+06	523022	NAD83	12_NAD27	3.57915e+06	523083		Sycamore Reservoir area	SMR-04-0660	56	14	lin	lineation stretch shape mylonitic Description

## Sheet: Sabino - Molino fol
StationId	ID	Lat	Long	UtmN	UtmE	UtmDatum	DateVisited	area	StationID	Trend (strike)	Plunge (dip)	Type	type 2	Shear sense	distance from arch axis (m)
JES-05-236	JES-05-236	32.3101	-110.719	3.57485e+06	526478		2005-01-25	Babad Do'ag N	JES-05-236	95	17	Composite foliation gneissic mylonitic foliation Description			#REF!
JES-05-240	JES-05-240	32.3124	-110.718	3.5751e+06	526585		2005-01-25	Babad Do'ag N	JES-05-240	84	17	Composite foliation gneissic mylonitic foliation Description			#REF!
JES-05-242	JES-05-242	32.3148	-110.718	3.57537e+06	526531		2005-01-25	Babad Do'ag N	JES-05-242	83	22	Composite foliation gneissic mylonitic foliation Description			#REF!
JES-05-245	JES-05-245	32.3174	-110.714	3.57566e+06	526950		2005-01-25	Babad Do'ag N	JES-05-245	85	14	Composite foliation gneissic mylonitic foliation Description			#REF!
JES-05-247	JES-05-247	32.3176	-110.715	3.57568e+06	526865		2005-01-25	Babad Do'ag N	JES-05-247	88	20	Composite foliation gneissic mylonitic foliation Description			#REF!
JES-05-258	JES-05-258	32.322	-110.719	3.57616e+06	526457		2005-01-25	Babad Do'ag N	JES-05-258	105	8	Composite foliation gneissic mylonitic foliation Description			#REF!
JES-05-260	JES-05-260	32.3198	-110.722	3.57592e+06	526201		2005-01-25	Babad Do'ag N	JES-05-260	108	11	Composite foliation gneissic mylonitic foliation Description			#REF!
JES-05-263	JES-05-263	32.3173	-110.723	3.57564e+06	526051		2005-01-25	Babad Do'ag N	JES-05-263	72	16	Composite foliation gneissic mylonitic foliation Description			#REF!
JES-05-265	JES-05-265	32.3134	-110.721	3.57521e+06	526256		2005-01-25	Babad Do'ag N	JES-05-265	92	12	Composite foliation gneissic mylonitic foliation Description			#REF!
JES-05-266	JES-05-266	32.3124	-110.722	3.5751e+06	526207		2005-01-25	Babad Do'ag N	JES-05-266	84	20	Composite foliation gneissic mylonitic foliation Description			#REF!
JES-05-133	JES-05-133	32.3353	-110.724	3.57764e+06	525937		2004-12-20	Gibbon Mtn E	JES-05-133	269	26	Composite foliation gneissic mylonitic foliation Description			#REF!
JES-05-140	JES-05-140	32.3356	-110.731	3.57766e+06	525346		2004-12-20	Gibbon Mtn E	JES-05-140	299	9	Composite foliation gneissic mylonitic foliation Description			#REF!
JES-05-142	JES-05-142	32.3358	-110.733	3.57768e+06	525164		2004-12-20	Gibbon Mtn E	JES-05-142	278	12	Composite foliation gneissic mylonitic foliation Description			#REF!
JES-05-143	JES-05-143	32.3354	-110.733	3.57764e+06	525097		2004-12-20	Gibbon Mtn E	JES-05-143	251	10	Composite foliation gneissic mylonitic foliation Description			#REF!
JES-05-150	JES-05-150	32.3328	-110.737	3.57736e+06	524795		2004-12-20	Gibbon Mtn E	JES-05-150	240	11	Composite foliation gneissic mylonitic foliation Description			#REF!
JES-05-160	JES-05-160	32.339	-110.744	3.57804e+06	524095		2004-12-20	Gibbon Mtn E	JES-05-160	36	12	Composite foliation gneissic mylonitic foliation Description			#REF!
JES-05-164	JES-05-164	32.337	-110.727	3.57783e+06	525730		2004-12-20	Gibbon Mtn E	JES-05-164	285	26	Composite foliation gneissic mylonitic foliation Description			#REF!
JES-05-165	JES-05-165	32.3377	-110.732	3.57791e+06	525211		2004-12-27	Gibbon Mtn SE	JES-05-165	261	20	Composite foliation gneissic mylonitic foliation Description			#REF!
JES-05-166	JES-05-166	32.3337	-110.74	3.57745e+06	524463		2004-12-27	Gibbon Mtn SE	JES-05-166	249	18	Composite foliation gneissic mylonitic foliation Description			#REF!
JES-05-167	JES-05-167	32.3332	-110.743	3.5774e+06	524192		2004-12-27	Gibbon Mtn SE	JES-05-167	250	10	Composite foliation gneissic mylonitic foliation Description			#REF!
JES-05-168	JES-05-168	32.3318	-110.745	3.57724e+06	524042		2004-12-27	Gibbon Mtn SE	JES-05-168	237	18	Composite foliation gneissic mylonitic foliation Description			#REF!
JES-05-169	JES-05-169	32.3304	-110.744	3.57709e+06	524053		2004-12-27	Gibbon Mtn SE	JES-05-169	30	2	Composite foliation gneissic mylonitic foliation Description			#REF!
JES-05-170	JES-05-170	32.3285	-110.746	3.57688e+06	523923		2004-12-27	Gibbon Mtn SE	JES-05-170	210	7	Composite foliation gneissic mylonitic foliation Description			#REF!
JES-05-171	JES-05-171	32.3262	-110.746	3.57662e+06	523910		2004-12-27	Gibbon Mtn SE	JES-05-171	42	8	Composite foliation gneissic mylonitic foliation Description			#REF!
JES-05-172	JES-05-172	32.3248	-110.746	3.57647e+06	523918		2004-12-27	Gibbon Mtn SE	JES-05-172	212	8	Composite foliation gneissic mylonitic foliation Description			#REF!
JES-05-173	JES-05-173	32.3237	-110.748	3.57634e+06	523739		2004-12-27	Gibbon Mtn SE	JES-05-173	112	12	Composite foliation gneissic mylonitic foliation Description			#REF!
JES-05-176	JES-05-176	32.3289	-110.746	3.57692e+06	523928		2004-12-27	Gibbon Mtn SE	JES-05-176	0	0	Composite foliation gneissic mylonitic foliation Description			#REF!
JES-05-178	JES-05-178	32.3325	-110.744	3.57733e+06	524098		2004-12-27	Gibbon Mtn SE	JES-05-178	245	17	Composite foliation gneissic mylonitic foliation Description			#REF!
JES-05-179	JES-05-179	32.3343	-110.745	3.57752e+06	524044		2004-12-27	Gibbon Mtn SE	JES-05-179	270	17	Composite foliation gneissic mylonitic foliation Description			#REF!
JES-05-180	JES-05-180	32.3349	-110.743	3.57759e+06	524170		2004-12-27	Gibbon Mtn SE	JES-05-180	236	13	Composite foliation gneissic mylonitic foliation Description			#REF!
JES-05-208	JES-05-208	32.3342	-110.747	3.5775e+06	523843		2005-01-20	Gibbon Mtn SW	JES-05-208	355	3	Composite foliation gneissic mylonitic foliation Description			#REF!
JES-05-210	JES-05-210	32.334	-110.749	3.57749e+06	523634		2005-01-20	Gibbon Mtn SW	JES-05-210	275	10	Composite foliation gneissic mylonitic foliation Description			#REF!
JES-05-211	JES-05-211	32.3335	-110.75	3.57743e+06	523491		2005-01-20	Gibbon Mtn SW	JES-05-211	273	4	Composite foliation gneissic mylonitic foliation Description			#REF!
JES-05-212	JES-05-212	32.3332	-110.752	3.5774e+06	523378		2005-01-20	Gibbon Mtn SW	JES-05-212	271	11	Composite foliation gneissic mylonitic foliation Description			#REF!
JES-05-218	JES-05-218	32.3293	-110.756	3.57697e+06	523010		2005-01-20	Gibbon Mtn SW	JES-05-218	250	4	Composite foliation gneissic mylonitic foliation Description			#REF!
JES-05-220	JES-05-220	32.3275	-110.759	3.57677e+06	522699		2005-01-20	Gibbon Mtn SW	JES-05-220	108	3	Composite foliation gneissic mylonitic foliation Description			#REF!
JES-05-221	JES-05-221	32.3257	-110.759	3.57657e+06	522672		2005-01-20	Gibbon Mtn SW	JES-05-221	95	11	Composite foliation gneissic mylonitic foliation Description			#REF!
JES-05-222	JES-05-222	32.3257	-110.76	3.57656e+06	522630		2005-01-20	Gibbon Mtn SW	JES-05-222	143	8	Composite foliation gneissic mylonitic foliation Description			#REF!
JES-05-224	JES-05-224	32.3252	-110.76	3.57651e+06	522636		2005-01-20	Gibbon Mtn SW	JES-05-224	125	4	Composite foliation gneissic mylonitic foliation Description			#REF!
JES-05-227	JES-05-227	32.3314	-110.75	3.5772e+06	523497		2005-01-20	Gibbon Mtn SW	JES-05-227	275	10	Composite foliation gneissic mylonitic foliation Description			#REF!
JES-05-228	JES-05-228	32.3323	-110.749	3.5773e+06	523596		2005-01-20	Gibbon Mtn SW	JES-05-228	38	10	Composite foliation gneissic mylonitic foliation Description			#REF!
JES-05-229	JES-05-229	32.3328	-110.748	3.57736e+06	523712		2005-01-20	Gibbon Mtn SW	JES-05-229	200	9	Composite foliation gneissic mylonitic foliation Description			#REF!
JES-05-231	JES-05-231	32.3331	-110.745	3.57739e+06	523978		2005-01-20	Gibbon Mtn SW	JES-05-231	12	7	Composite foliation gneissic mylonitic foliation Description			#REF!
JES-05-081	JES-05-081	32.3082	-110.717	3.57463e+06	526667		2004-11-10	lower Molino Cyn	JES-05-081	95	14	Composite foliation gneissic mylonitic foliation Description			#REF!
JES-05-082	JES-05-082	32.3067	-110.717	3.57446e+06	526651		2004-11-10	lower Molino Cyn	JES-05-082	54	17	Composite foliation gneissic mylonitic foliation Description			#REF!
JES-05-085	JES-05-085	32.306	-110.714	3.57439e+06	526971		2004-11-10	lower Molino Cyn	JES-05-085	170	6	Composite foliation gneissic mylonitic foliation Description			#REF!
JES-05-086	JES-05-086	32.307	-110.713	3.5745e+06	527035		2004-11-10	lower Molino Cyn	JES-05-086	102	11	Composite foliation gneissic mylonitic foliation Description			#REF!
JES-05-088	JES-05-088	32.3083	-110.711	3.57465e+06	527246		2004-11-10	lower Molino Cyn	JES-05-088	136	7	Composite foliation gneissic mylonitic foliation Description			#REF!
JES-05-089	JES-05-089	32.3082	-110.711	3.57464e+06	527248		2004-11-10	lower Molino Cyn	JES-05-089	112	10	Composite foliation gneissic mylonitic foliation Description			#REF!
JES-05-090	JES-05-090	32.3085	-110.71	3.57467e+06	527305		2004-11-10	lower Molino Cyn	JES-05-090	105	15	Composite foliation gneissic mylonitic foliation Description			#REF!
JES-05-092	JES-05-092	32.3098	-110.71	3.57482e+06	527336		2004-11-10	lower Molino Cyn	JES-05-092	67	40	Composite foliation gneissic mylonitic foliation Description			#REF!
JES-05-094	JES-05-094	32.3108	-110.71	3.57493e+06	527345		2004-11-10	lower Molino Cyn	JES-05-094	98	15	Composite foliation gneissic mylonitic foliation Description			#REF!
JES-05-096	JES-05-096	32.3121	-110.709	3.57507e+06	527394		2004-11-10	lower Molino Cyn	JES-05-096	116	18	Composite foliation gneissic mylonitic foliation Description			#REF!
JES-05-098	JES-05-098	32.3127	-110.709	3.57513e+06	527394		2004-11-10	lower Molino Cyn	JES-05-098	79	17	Composite foliation gneissic mylonitic foliation Description			#REF!
JES-05-099	JES-05-099	32.3137	-110.709	3.57524e+06	527369		2004-11-10	lower Molino Cyn	JES-05-099	50	8	Composite foliation gneissic mylonitic foliation Description			#REF!
JES-05-100	JES-05-100	32.3138	-110.709	3.57526e+06	527384		2004-11-10	lower Molino Cyn	JES-05-100	20	9	Composite foliation gneissic mylonitic foliation Description			#REF!
JES-05-102	JES-05-102	32.3149	-110.709	3.57538e+06	527396		2004-11-10	lower Molino Cyn	JES-05-102	75	10	Composite foliation gneissic mylonitic foliation Description			#REF!
JES-05-104	JES-05-104	32.3136	-110.712	3.57523e+06	527070		2004-11-10	lower Molino Cyn	JES-05-104	122	18	Composite foliation gneissic mylonitic foliation Description			#REF!
JES-05-105	JES-05-105	32.3131	-110.714	3.57518e+06	526945		2004-11-10	lower Molino Cyn	JES-05-105	159	9	Composite foliation gneissic mylonitic foliation Description			#REF!
JES-05-107	JES-05-107	32.3132	-110.716	3.57519e+06	526731		2004-11-10	lower Molino Cyn	JES-05-107	83	17	Composite foliation gneissic mylonitic foliation Description			#REF!
JES-05-108	JES-05-108	32.3126	-110.718	3.57512e+06	526592		2004-11-10	lower Molino Cyn	JES-05-108	120	14	Composite foliation gneissic mylonitic foliation Description			#REF!
JES-05-109	JES-05-109	32.3113	-110.717	3.57498e+06	526669		2004-11-10	lower Molino Cyn	JES-05-109	125	14	Composite foliation gneissic mylonitic foliation Description			#REF!
JES-05-183	JES-05-183	32.3174	-110.745	3.57565e+06	523963		2004-12-30	Lower Soldier Cyn	JES-05-183	240	8	Composite foliation gneissic mylonitic foliation Description			#REF!
JES-05-184	JES-05-184	32.3176	-110.746	3.57567e+06	523943		2004-12-30	Lower Soldier Cyn	JES-05-184		0	Composite foliation gneissic mylonitic foliation Description			#REF!
JES-05-185	JES-05-185	32.3167	-110.745	3.57557e+06	523982		2004-12-30	Lower Soldier Cyn	JES-05-185	94	9	Composite foliation gneissic mylonitic foliation Description			#REF!
JES-05-186	JES-05-186	32.3179	-110.744	3.5757e+06	524136		2004-12-30	Lower Soldier Cyn	JES-05-186	306	4	Composite foliation gneissic mylonitic foliation Description			#REF!
JES-05-189	JES-05-189	32.3158	-110.743	3.57547e+06	524157		2004-12-30	Lower Soldier Cyn	JES-05-189	70	8	Composite foliation gneissic mylonitic foliation Description			#REF!
JES-05-190	JES-05-190	32.3145	-110.717	3.57534e+06	526602		2004-12-31	Lower Soldier Cyn	JES-05-190	86	23	Composite foliation gneissic mylonitic foliation Description			#REF!
JES-05-111	JES-05-111	32.3322	-110.723	3.57729e+06	526024		2004-11-24	Middle Soldier Canyon	JES-05-111	313	19	Composite foliation gneissic mylonitic foliation Description			#REF!
JES-05-113	JES-05-113	32.3324	-110.725	3.57732e+06	525878		2004-12-13	Middle Soldier Canyon	JES-05-113	294	10	Composite foliation gneissic mylonitic foliation Description			#REF!
JES-05-115	JES-05-115	32.331	-110.725	3.57716e+06	525870		2004-12-13	Middle Soldier Canyon	JES-05-115	5	10	Composite foliation gneissic mylonitic foliation Description			#REF!
JES-05-124	JES-05-124	32.3308	-110.729	3.57713e+06	525485		2004-12-13	Middle Soldier Canyon	JES-05-124	310	11	Composite foliation gneissic mylonitic foliation Description			#REF!
JES-05-125	JES-05-125	32.3284	-110.73	3.57686e+06	525372		2004-12-13	Middle Soldier Canyon	JES-05-125	340	8	Composite foliation gneissic mylonitic foliation Description			#REF!
JES-05-127	JES-05-127	32.3267	-110.732	3.57668e+06	525197		2004-12-13	Middle Soldier Canyon	JES-05-127	285	8	Composite foliation gneissic mylonitic foliation Description			#REF!
JES-05-128	JES-05-128	32.3274	-110.733	3.57676e+06	525171		2004-12-13	Middle Soldier Canyon	JES-05-128	325	8	Composite foliation gneissic mylonitic foliation Description			#REF!
JES-05-129	JES-05-129	32.3281	-110.73	3.57684e+06	525430		2004-12-13	Middle Soldier Canyon	JES-05-129	287	10	Composite foliation gneissic mylonitic foliation Description			#REF!
JES-05-130	JES-05-130	32.3285	-110.728	3.57689e+06	525609		2004-12-13	Middle Soldier Canyon	JES-05-130	288	16	Composite foliation gneissic mylonitic foliation Description			#REF!
JES-05-001	JES-05-001	32.3352	-110.721	3.57763e+06	526287		2004-10-20	Prison Camp E	JES-05-001	260	36	Composite foliation gneissic mylonitic foliation Description			#REF!
JES-05-002	JES-05-002	32.3348	-110.721	3.57758e+06	526299		2004-10-20	Prison Camp E	JES-05-002	316	14	Composite foliation gneissic mylonitic foliation Description			#REF!
JES-05-005	JES-05-005	32.3344	-110.72	3.57754e+06	526352		2004-10-20	Prison Camp E	JES-05-005	338	14	Composite foliation gneissic mylonitic foliation Description			#REF!
JES-05-016	JES-05-016	32.338	-110.714	3.57794e+06	526955		2004-10-20	Prison Camp E	JES-05-016	0	12	Composite foliation gneissic mylonitic foliation Description			#REF!
JES-05-018	JES-05-018	32.3382	-110.716	3.57796e+06	526745		2004-10-20	Prison Camp E	JES-05-018	355	14	Composite foliation gneissic mylonitic foliation Description			#REF!
JES-05-019	JES-05-019	32.3345	-110.723	3.57755e+06	526042		2004-10-22	Prison Camp S 22 Oct	JES-05-019	333	14	Composite foliation gneissic mylonitic foliation Description			#REF!
JES-05-020	JES-05-020	32.3338	-110.724	3.57747e+06	525986		2004-10-22	Prison Camp S 22 Oct	JES-05-020	357	12	Composite foliation gneissic mylonitic foliation Description			#REF!
JES-05-025	JES-05-025	32.3328	-110.722	3.57736e+06	526140		2004-10-22	Prison Camp S 22 Oct	JES-05-025	270	8	Composite foliation gneissic mylonitic foliation Description			#REF!
JES-05-032	JES-05-032	32.3322	-110.718	3.57729e+06	526502		2004-10-22	Prison Camp S 22 Oct	JES-05-032	295	6	Composite foliation gneissic mylonitic foliation Description			#REF!
JES-05-036	JES-05-036	32.3279	-110.716	3.57681e+06	526733		2004-10-22	Prison Camp S 22 Oct	JES-05-036	47	13	Composite foliation gneissic mylonitic foliation Description		SW	#REF!
JES-05-071	JES-05-071	32.3236	-110.721	3.57634e+06	526303		2004-11-05	Prison Camp SE (5 Nov)	JES-05-071	245	15	Composite foliation gneissic mylonitic foliation Description			#REF!
JES-05-073	JES-05-073	32.3249	-110.722	3.57649e+06	526144		2004-11-05	Prison Camp SE (5 Nov)	JES-05-073	265	27	Composite foliation gneissic mylonitic foliation Description			#REF!
JES-05-074	JES-05-074	32.3251	-110.723	3.57651e+06	526065		2004-11-05	Prison Camp SE (5 Nov)	JES-05-074	265	20	Composite foliation gneissic mylonitic foliation Description			#REF!
JES-05-300	JES-05-300	32.344	-110.78	3.57859e+06	520681		2005-02-03	Sabino Cyn N, phoneline trail	JES-05-300	265	18	Composite foliation gneissic mylonitic foliation Description			#REF!
JES-05-301	JES-05-301	32.3441	-110.78	3.5786e+06	520724		2005-02-03	Sabino Cyn N, phoneline trail	JES-05-301	232	9	Composite foliation gneissic mylonitic foliation Description			#REF!
JES-05-302	JES-05-302	32.3443	-110.779	3.57862e+06	520752		2005-02-03	Sabino Cyn N, phoneline trail	JES-05-302	253	20	Composite foliation gneissic mylonitic foliation Description			#REF!
JES-05-303	JES-05-303	32.3444	-110.779	3.57863e+06	520813		2005-02-03	Sabino Cyn N, phoneline trail	JES-05-303	235	17	Composite foliation gneissic mylonitic foliation Description			#REF!
JES-05-305	JES-05-305	32.3442	-110.778	3.57861e+06	520897		2005-02-03	Sabino Cyn N, phoneline trail	JES-05-305	236	15	Composite foliation gneissic mylonitic foliation Description			#REF!
JES-05-306	JES-05-306	32.3428	-110.779	3.57846e+06	520774		2005-02-03	Sabino Cyn N, phoneline trail	JES-05-306	256	21	Composite foliation gneissic mylonitic foliation Description			#REF!
JES-05-308	JES-05-308	32.3409	-110.78	3.57824e+06	520731		2005-02-03	Sabino Cyn N, phoneline trail	JES-05-308	85	22	Composite foliation gneissic mylonitic foliation Description			#REF!
JES-05-311	JES-05-311	32.3374	-110.782	3.57786e+06	520484		2005-02-03	Sabino Cyn N, phoneline trail	JES-05-311	270	9	Composite foliation gneissic mylonitic foliation Description			#REF!
JES-05-312	JES-05-312	32.3367	-110.783	3.57778e+06	520434		2005-02-03	Sabino Cyn N, phoneline trail	JES-05-312	258	13	Composite foliation gneissic mylonitic foliation Description			#REF!
JES-05-313	JES-05-313	32.3359	-110.782	3.57769e+06	520491		2005-02-03	Sabino Cyn N, phoneline trail	JES-05-313	235	10	Composite foliation gneissic mylonitic foliation Description			#REF!
JES-05-315	JES-05-315	32.3307	-110.787	3.57711e+06	520071		2005-02-03	Sabino Cyn N, phoneline trail	JES-05-315	254	13	Composite foliation gneissic mylonitic foliation Description			#REF!
JES-05-475	JES-05-475	32.3073	-110.81	3.57452e+06	517859		2005-03-04	Sabino Cyn, east side (Blackett)	JES-05-475	119	22	Composite foliation gneissic mylonitic foliation Description			#REF!
JES-05-476	JES-05-476	32.3078	-110.811	3.57457e+06	517830		2005-03-04	Sabino Cyn, east side (Blackett)	JES-05-476	129	22	Composite foliation gneissic mylonitic foliation Description			#REF!
JES-05-485	JES-05-485	32.3217	-110.802	3.57611e+06	518670		2005-03-04	Sabino Cyn, east side (Blackett)	JES-05-485	156	15	Composite foliation gneissic mylonitic foliation Description			#REF!
JES-05-486	JES-05-486	32.3223	-110.801	3.57618e+06	518749		2005-03-04	Sabino Cyn, east side (Blackett)	JES-05-486	162	17	Composite foliation gneissic mylonitic foliation Description			#REF!
JES-05-488	JES-05-488	32.3243	-110.796	3.5764e+06	519239		2005-03-04	Sabino Cyn, east side (Blackett)	JES-05-488	133	10	Composite foliation gneissic mylonitic foliation Description			#REF!
JES-05-489	JES-05-489	32.3244	-110.793	3.57642e+06	519450		2005-03-04	Sabino Cyn, east side (Blackett)	JES-05-489	170	11	Composite foliation gneissic mylonitic foliation Description			#REF!
JES-05-318	JES-05-318	32.3283	-110.791	3.57684e+06	519658		2005-02-03	Sabino Cyn, phoneline trail	JES-05-318	173	12	Composite foliation gneissic mylonitic foliation Description			#REF!
JES-05-319	JES-05-319	32.3282	-110.793	3.57684e+06	519525		2005-02-03	Sabino Cyn, phoneline trail	JES-05-319	142	7	Composite foliation gneissic mylonitic foliation Description			#REF!
JES-05-322	JES-05-322	32.3265	-110.797	3.57665e+06	519150		2005-02-03	Sabino Cyn, phoneline trail	JES-05-322	82	20	Composite foliation gneissic mylonitic foliation Description			#REF!
JES-05-323	JES-05-323	32.3257	-110.798	3.57656e+06	518995		2005-02-03	Sabino Cyn, phoneline trail	JES-05-323	127	8	Composite foliation gneissic mylonitic foliation Description			#REF!
JES-05-324	JES-05-324	32.3255	-110.799	3.57654e+06	518904		2005-02-03	Sabino Cyn, phoneline trail	JES-05-324	110	26	Composite foliation gneissic mylonitic foliation Description			#REF!
JES-05-326	JES-05-326	32.323	-110.804	3.57626e+06	518450		2005-02-03	Sabino Cyn, phoneline trail	JES-05-326	195	10	Composite foliation gneissic mylonitic foliation Description			#REF!
JES-05-327	JES-05-327	32.3215	-110.807	3.57609e+06	518208		2005-02-03	Sabino Cyn, phoneline trail	JES-05-327	122	17	Composite foliation gneissic mylonitic foliation Description			#REF!
JES-05-328	JES-05-328	32.3218	-110.806	3.57613e+06	518278		2005-02-03	Sabino Cyn, phoneline trail	JES-05-328	127	16	Composite foliation gneissic mylonitic foliation Description			#REF!
JES-05-329	JES-05-329	32.3207	-110.807	3.576e+06	518182		2005-02-03	Sabino Cyn, phoneline trail	JES-05-329	303	24	Composite foliation gneissic mylonitic foliation Description			#REF!
JES-05-333	JES-05-333	32.3176	-110.808	3.57565e+06	518040		2005-02-03	Sabino Cyn, phoneline trail	JES-05-333	165	18	Composite foliation gneissic mylonitic foliation Description			#REF!
JES-05-334	JES-05-334	32.317	-110.808	3.57559e+06	518072		2005-02-03	Sabino Cyn, phoneline trail	JES-05-334	172	16	Composite foliation gneissic mylonitic foliation Description			#REF!
JES-05-335	JES-05-335	32.3157	-110.808	3.57544e+06	518040		2005-02-03	Sabino Cyn, phoneline trail	JES-05-335	158	13	Composite foliation gneissic mylonitic foliation Description			#REF!
JES-05-337	JES-05-337	32.3131	-110.809	3.57515e+06	518006		2005-02-03	Sabino Cyn, phoneline trail	JES-05-337	162	10	Composite foliation gneissic mylonitic foliation Description			#REF!
JES-05-338	JES-05-338	32.312	-110.808	3.57503e+06	518031		2005-02-03	Sabino Cyn, phoneline trail	JES-05-338	153	18	Composite foliation gneissic mylonitic foliation Description			#REF!
JES-05-339	JES-05-339	32.3112	-110.81	3.57495e+06	517906		2005-02-03	Sabino Cyn, phoneline trail	JES-05-339	162	12	Composite foliation gneissic mylonitic foliation Description			#REF!
JES-05-340	JES-05-340	32.3114	-110.811	3.57496e+06	517787		2005-02-03	Sabino Cyn, phoneline trail	JES-05-340	158	21	Composite foliation gneissic mylonitic foliation Description			#REF!
JES-05-341	JES-05-341	32.3107	-110.812	3.57489e+06	517686		2005-02-03	Sabino Cyn, phoneline trail	JES-05-341	138	24	Composite foliation gneissic mylonitic foliation Description			#REF!
JES-05-342	JES-05-342	32.3091	-110.813	3.57471e+06	517559		2005-02-03	Sabino Cyn, phoneline trail	JES-05-342	125	19	Composite foliation gneissic mylonitic foliation Description			#REF!
JES-05-347	JES-05-347	32.3106	-110.817	3.57488e+06	517232		2005-02-03	Sabino Cyn, phoneline trail	JES-05-347	171	16	Composite foliation gneissic mylonitic foliation Description			#REF!
JES-05-350	JES-05-350	32.3121	-110.819	3.57505e+06	517085		2005-02-03	Sabino Cyn, phoneline trail	JES-05-350	160	18	Composite foliation gneissic mylonitic foliation Description			#REF!
JES-05-352	JES-05-352	32.3128	-110.818	3.57513e+06	517103		2005-02-03	Sabino Cyn, phoneline trail	JES-05-352	150	18	Composite foliation gneissic mylonitic foliation Description			#REF!
JES-05-457	JES-05-457	32.327	-110.81	3.5767e+06	517920		2005-02-27	Sabino Cyn, west side	JES-05-457	54	19	Composite foliation gneissic mylonitic foliation Description			#REF!
JES-05-458	JES-05-458	32.3281	-110.807	3.57682e+06	518132		2005-02-27	Sabino Cyn, west side	JES-05-458	96	20	Composite foliation gneissic mylonitic foliation Description			#REF!
JES-05-460	JES-05-460	32.3295	-110.805	3.57697e+06	518380		2005-02-27	Sabino Cyn, west side	JES-05-460	119	15	Composite foliation gneissic mylonitic foliation Description			#REF!
JES-05-462	JES-05-462	32.3309	-110.802	3.57713e+06	518660		2005-02-27	Sabino Cyn, west side	JES-05-462	196	16	Composite foliation gneissic mylonitic foliation Description			#REF!
JES-05-464	JES-05-464	32.3323	-110.8	3.57729e+06	518792		2005-02-27	Sabino Cyn, west side	JES-05-464	192	20	Composite foliation gneissic mylonitic foliation Description			#REF!
JES-05-466	JES-05-466	32.3251	-110.811	3.57649e+06	517756		2005-02-27	Sabino Cyn, west side	JES-05-466	129	18	Composite foliation gneissic mylonitic foliation Description			#REF!
JES-05-467	JES-05-467	32.3235	-110.814	3.5763e+06	517544		2005-02-27	Sabino Cyn, west side	JES-05-467	140	22	Composite foliation gneissic mylonitic foliation Description			#REF!
JES-05-468	JES-05-468	32.3224	-110.814	3.57619e+06	517552		2005-02-27	Sabino Cyn, west side	JES-05-468	164	22	Composite foliation gneissic mylonitic foliation Description			#REF!
JES-05-469	JES-05-469	32.3197	-110.813	3.57589e+06	517629		2005-02-27	Sabino Cyn, west side	JES-05-469	162	12	Composite foliation gneissic mylonitic foliation Description			#REF!
JES-05-470	JES-05-470	32.3183	-110.814	3.57574e+06	517491		2005-02-27	Sabino Cyn, west side	JES-05-470	151	11	Composite foliation gneissic mylonitic foliation Description			#REF!
JES-05-471	JES-05-471	32.3173	-110.817	3.57563e+06	517263		2005-02-27	Sabino Cyn, west side	JES-05-471	158	11	Composite foliation gneissic mylonitic foliation Description			#REF!
JES-05-472	JES-05-472	32.3166	-110.818	3.57554e+06	517152		2005-02-27	Sabino Cyn, west side	JES-05-472	149	17	Composite foliation gneissic mylonitic foliation Description			#REF!
JES-05-474	JES-05-474	32.3162	-110.819	3.5755e+06	517035		2005-02-27	Sabino Cyn, west side	JES-05-474	156	14	Composite foliation gneissic mylonitic foliation Description			#REF!
JES-05-268	JES-05-268	32.3053	-110.746	3.5743e+06	523947		2005-01-28	Soldier Cyn, lower, west ridge	JES-05-268	96	19	Composite foliation gneissic mylonitic foliation Description			#REF!
JES-05-270	JES-05-270	32.3061	-110.748	3.57439e+06	523757		2005-01-28	Soldier Cyn, lower, west ridge	JES-05-270	80	34	Composite foliation gneissic mylonitic foliation Description			#REF!
JES-05-272	JES-05-272	32.3067	-110.749	3.57446e+06	523594		2005-01-28	Soldier Cyn, lower, west ridge	JES-05-272	90	28	Composite foliation gneissic mylonitic foliation Description			#REF!
JES-05-273	JES-05-273	32.3075	-110.75	3.57455e+06	523517		2005-01-28	Soldier Cyn, lower, west ridge	JES-05-273	91	22	Composite foliation gneissic mylonitic foliation Description			#REF!
JES-05-274	JES-05-274	32.3085	-110.75	3.57466e+06	523523		2005-01-28	Soldier Cyn, lower, west ridge	JES-05-274	120	20	Composite foliation gneissic mylonitic foliation Description			#REF!
JES-05-276	JES-05-276	32.3133	-110.747	3.57519e+06	523847		2005-01-28	Soldier Cyn, lower, west ridge	JES-05-276	109	16	Composite foliation gneissic mylonitic foliation Description			#REF!
JES-05-277	JES-05-277	32.315	-110.747	3.57539e+06	523816		2005-01-28	Soldier Cyn, lower, west ridge	JES-05-277	80	22	Composite foliation gneissic mylonitic foliation Description			#REF!
JES-05-281	JES-05-281	32.3194	-110.748	3.57587e+06	523715		2005-01-28	Soldier Cyn, lower, west ridge	JES-05-281	133	12	Composite foliation gneissic mylonitic foliation Description			#REF!
JES-05-284	JES-05-284	32.3206	-110.751	3.576e+06	523457		2005-01-28	Soldier Cyn, lower, west ridge	JES-05-284	112	11	Composite foliation gneissic mylonitic foliation Description			#REF!
JES-05-285	JES-05-285	32.3196	-110.752	3.57589e+06	523349		2005-01-28	Soldier Cyn, lower, west ridge	JES-05-285	92	13	Composite foliation gneissic mylonitic foliation Description			#REF!
JES-05-286	JES-05-286	32.3191	-110.752	3.57583e+06	523324		2005-01-28	Soldier Cyn, lower, west ridge	JES-05-286	95	14	Composite foliation gneissic mylonitic foliation Description			#REF!
JES-05-288	JES-05-288	32.3163	-110.753	3.57552e+06	523254		2005-01-28	Soldier Cyn, lower, west ridge	JES-05-288	88	22	Composite foliation gneissic mylonitic foliation Description			#REF!
JES-05-289	JES-05-289	32.3155	-110.754	3.57544e+06	523156		2005-01-28	Soldier Cyn, lower, west ridge	JES-05-289	97	18	Composite foliation gneissic mylonitic foliation Description			#REF!
JES-05-290	JES-05-290	32.3139	-110.753	3.57526e+06	523286		2005-01-28	Soldier Cyn, lower, west ridge	JES-05-290	113	20	Composite foliation gneissic mylonitic foliation Description			#REF!
[truncated: 77 more rows]

## Sheet: Banks - Pontotoc
number	Trend (strike)	Plunge (dip)	Type
1	116	18	fol
2	247	12	lin
3	123	25	fol
4	247	18	lin
[truncated: 26 more rows]

## Sheet: Tanque Verde Ridge
StationId	Lat	Long	UtmN	UtmE	UtmDatum	UtmZone	DateVisited	Project	area	Station	trend	plunge	type
[truncated: 28 more rows]

[truncated: 11 more sheets: Bellota, Sycamore, Tanque Verde Falls, Windy Point, Windy Point (2), WinPt av S & D meas, Agua Caliente, Molino E, Molino-Soldier-Gibbon, Sabino, Pusch]
